# Supplementary material for: Gene expression profiling of single cells from archival tissue with laser-capture microdissection and Smart-3SEQ
Source: Genome Res. 2019 Nov;29(11):1816–25. doi: 10.1101/gr.234807.118 (PMC6836736; doi:10.1101/gr.234807.118)
Supplement: Supplemental Material [file supp_gr.234807.118_Supplemental_File_3.xlsx]

## Sheet: README
Legend of spreadsheets in this file
count	number of reads uniquely aligned to each gene
TPM	read counts normalized to transcripts per million
rlog	read counts normalized to regularized logarithm by DESeq2
bulk comparison	bulk DCIS vs. bulk macrophage
single comparison	single DCIS vs. single macrophage, excluding DCIS cells that lack the ERBB2 amplification
amp comparison	single DCIS with the amplification vs. single DCIS without the amplification
site comparison	single DCIS without the amplification (inferred ductal macrophage) vs. single macrophage (stromal)
single vs. bulk	single cells vs. bulk tissue, controlling for tissue type, excluding DCIS cells without the amplification
DCIS vs. macrophage	DCIS vs. macrophage, single cells and bulk combined and controlled for, excluding DCIS cells without the amplification

## Sheet: count
Ensembl ID	gene name	macrophage_bulk_1	macrophage_bulk_2	macrophage_bulk_3	macrophage_bulk_4	macrophage_bulk_5	macrophage_bulk_6	DCIS_bulk_1	DCIS_bulk_2	DCIS_bulk_3	DCIS_bulk_4	DCIS_bulk_5	DCIS_bulk_6	macrophage_single_1	macrophage_single_2	macrophage_single_3	macrophage_single_4	macrophage_single_5	macrophage_single_6	macrophage_single_7	macrophage_single_8	macrophage_single_9	macrophage_single_10	DCIS_single_1	DCIS_single_2	DCIS_single_3	DCIS_single_4	DCIS_single_5	DCIS_single_6	DCIS_single_7	DCIS_single_8	DCIS_single_9	DCIS_single_10	control_1	control_2	control_3	control_4	control_5	control_6
ENSG00000227232	WASH7P	0	0	0	0	0	0	1	1	5	0	2	0	0	0	0	0	3	0	0	0	0	0	0	3	0	0	1	0	4	2	0	3	0	0	0	0	0	0
ENSG00000279457	FO538757.1	0	5	0	6	0	0	1	2	4	1	2	6	0	0	0	0	23	0	0	0	0	0	0	0	0	1	0	0	0	15	0	0	0	0	0	1	0	0
ENSG00000228463	AP006222.1	0	0	2	0	0	0	5	0	2	0	0	5	0	0	0	0	0	0	0	2	0	0	0	0	12	0	0	0	41	0	0	0	0	0	0	0	0	0
ENSG00000237094	AL732372.2	0	0	0	0	0	1	0	0	0	0	0	0	0	0	0	0	0	0	0	1	0	0	0	0	0	0	0	0	0	1	0	0	0	0	0	0	0	0
ENSG00000230021	AL669831.3	1	0	0	0	0	2	0	1	1	0	0	2	14	2	0	0	0	0	0	0	0	0	0	0	0	0	0	0	0	17	0	0	0	0	0	0	0	0
ENSG00000225972	MTND1P23	1787	1708	1705	1833	1641	1881	482	520	518	577	391	530	1094	577	1979	1404	2292	862	421	809	790	293	18	108	834	206	1165	359	1802	3653	869	2553	3	92	3	5	1	15
ENSG00000225630	MTND2P28	2624	2414	2921	2756	2534	2546	1460	1473	1508	2066	1719	1390	1508	701	3066	1800	3162	494	1186	1294	740	797	110	278	1869	1038	2387	295	2150	12912	1149	7066	12	14	6	2	7	25
ENSG00000237973	MTCO1P12	3757	3246	3610	3679	3486	3844	2982	2567	3229	4282	3491	3490	604	717	2018	1101	2339	599	1184	323	766	268	251	379	1774	672	2540	299	2114	18817	1784	8574	7	22	38	5	9	131
ENSG00000278791	MIR6723	0	0	0	0	0	1	0	0	0	0	0	0	0	0	0	0	0	0	0	0	0	0	0	0	0	0	0	0	0	0	0	0	0	0	0	0	0	0
ENSG00000229344	MTCO2P12	14	21	28	28	59	40	28	42	48	41	49	72	26	2	20	1	0	36	95	0	0	0	0	0	20	54	1	0	78	285	0	100	0	0	14	0	0	0
ENSG00000240409	MTATP8P1	0	1	0	1	0	0	0	0	0	0	0	0	0	0	0	0	3	0	0	0	0	0	0	0	0	0	2	0	0	0	1	0	0	0	0	0	0	0
ENSG00000248527	MTATP6P1	0	6	0	3	0	3	3	4	7	4	6	0	0	0	10	0	2	0	0	0	0	0	0	0	1	1	0	0	0	2	0	1	0	0	0	0	0	0
ENSG00000198744	MTCO3P12	170	118	100	103	86	65	80	107	101	65	100	128	84	3	161	61	278	40	27	88	1	0	20	22	105	1	181	45	113	580	0	343	0	0	0	0	3	3
ENSG00000228327	AL669831.1	0	0	0	0	0	0	0	0	0	1	0	0	0	0	0	0	0	0	0	0	0	0	0	0	0	0	0	0	0	0	1	0	0	0	0	0	0	0
ENSG00000237491	AL669831.5	4	4	4	0	16	36	9	2	1	0	6	2	0	0	0	7	0	0	0	0	0	0	0	0	0	0	0	0	0	0	0	59	0	0	0	0	0	0
ENSG00000230092	AL669831.4	9	23	48	33	33	39	14	6	16	28	23	25	0	0	0	24	0	0	32	0	0	0	0	0	0	1	80	0	26	110	77	56	0	0	0	0	0	0
ENSG00000177757	FAM87B	0	0	0	0	0	0	0	0	0	0	0	0	0	0	1	0	0	0	0	0	0	0	0	0	0	0	0	0	0	0	0	0	0	0	0	0	0	0
ENSG00000228794	LINC01128	41	24	14	0	34	3	4	6	6	1	6	14	0	0	85	1	0	0	0	1	0	0	0	0	0	0	125	29	51	0	0	59	0	0	0	0	0	1
ENSG00000225880	LINC00115	1	6	0	0	26	20	0	2	0	2	1	11	0	0	0	0	0	0	0	0	0	1	0	0	0	0	0	0	0	0	0	0	0	0	0	0	0	0
ENSG00000234711	TUBB8P11	0	0	0	0	0	0	0	0	0	0	0	0	0	0	0	0	0	0	0	0	0	0	0	0	0	0	0	0	0	1	0	0	0	0	0	0	0	0
ENSG00000223764	AL645608.1	0	0	0	0	0	3	0	3	0	0	1	0	0	0	0	0	0	0	0	0	0	0	0	0	0	0	0	0	0	0	0	0	0	0	0	0	0	0
ENSG00000187634	SAMD11	0	0	0	0	0	0	0	3	0	0	0	0	0	45	0	0	0	0	0	0	0	0	0	0	0	0	0	0	0	1	8	5	0	0	0	0	0	0
ENSG00000188976	NOC2L	0	6	15	0	0	11	0	0	0	2	1	0	0	0	0	6	0	1	47	0	0	0	0	0	15	0	28	0	0	3	0	0	0	0	0	0	0	0
ENSG00000187961	KLHL17	0	0	0	0	0	0	0	0	0	0	0	0	0	0	0	0	0	0	0	0	0	0	0	0	0	0	0	0	0	0	0	49	0	0	0	0	0	0
ENSG00000187583	PLEKHN1	0	0	11	0	0	0	3	0	3	0	3	1	0	0	0	0	0	0	0	0	0	0	0	0	0	0	0	0	0	0	0	4	0	0	0	0	0	0
ENSG00000272512	AL645608.8	0	0	1	0	0	0	1	0	1	0	3	0	0	0	0	0	0	0	0	0	0	0	0	0	0	0	0	0	0	0	0	0	0	0	0	0	0	0
ENSG00000188290	HES4	1	11	5	17	10	0	42	10	17	31	17	22	2	20	50	0	1	0	0	30	36	0	27	0	48	1	9	0	6	107	0	128	0	0	0	1	0	0
ENSG00000187608	ISG15	15	4	10	6	9	5	6	1	6	11	7	5	0	0	0	0	0	0	0	0	0	0	0	0	0	0	39	11	1	34	0	17	0	0	0	0	0	0
ENSG00000188157	AGRN	0	0	0	0	0	0	0	0	3	1	0	2	0	0	0	0	0	0	0	0	0	0	0	0	0	0	0	0	0	0	0	0	0	0	0	0	0	0
ENSG00000217801	AL390719.1	0	0	0	0	0	3	0	0	0	1	2	0	0	0	0	0	1	0	0	0	0	0	0	0	0	0	0	0	0	25	0	0	0	0	0	0	0	0
ENSG00000237330	RNF223	0	0	0	0	0	0	4	0	0	1	4	0	0	0	0	0	0	0	0	0	0	0	0	0	0	0	0	0	0	0	0	0	0	0	0	0	0	0
ENSG00000131591	C1orf159	1	17	2	4	0	0	3	0	1	3	6	4	0	0	0	0	0	1	0	0	5	0	0	26	0	0	1	0	1	11	0	1	0	0	1	0	0	0
ENSG00000223823	LINC01342	0	0	0	0	0	0	0	0	0	3	0	0	0	0	0	0	0	0	0	0	0	0	0	0	0	0	0	0	0	0	0	0	0	0	0	0	0	0
ENSG00000272141	AL390719.2	0	0	0	0	0	0	1	0	0	0	3	7	0	0	0	0	0	0	0	0	0	0	0	0	0	0	0	0	0	18	0	0	0	0	0	0	0	0
ENSG00000205231	TTLL10-AS1	0	0	0	1	0	0	0	0	0	0	0	0	0	0	0	0	0	0	0	0	0	0	0	0	0	0	0	0	0	0	0	0	0	0	0	0	0	0
ENSG00000186891	TNFRSF18	37	2	27	11	8	16	0	3	3	10	3	12	0	0	0	0	0	0	0	0	0	0	0	0	0	3	51	0	0	83	0	0	0	0	0	0	0	1
ENSG00000186827	TNFRSF4	0	2	0	2	0	0	0	0	0	1	0	0	0	1	0	0	0	0	0	0	0	0	0	0	0	0	0	0	61	15	0	0	0	0	0	0	0	0
ENSG00000078808	SDF4	83	130	70	78	114	90	31	12	41	61	15	43	0	62	2	77	45	41	8	0	2	1	0	15	188	3	49	27	167	21	131	148	1	0	0	1	1	141
ENSG00000176022	B3GALT6	5	10	26	65	42	7	9	0	17	5	4	15	22	0	0	54	0	0	0	0	0	0	0	1	0	0	55	0	0	1	0	0	0	0	0	0	0	0
ENSG00000184163	C1QTNF12	0	0	0	0	0	0	1	0	2	1	0	0	0	0	0	0	0	0	0	0	0	0	0	0	0	0	0	0	0	27	0	0	0	0	0	0	0	0
ENSG00000160087	UBE2J2	10	57	43	27	44	42	13	15	11	22	3	12	0	33	0	0	0	0	13	0	19	0	0	1	0	6	18	0	152	30	147	99	0	0	0	0	0	0
ENSG00000162572	SCNN1D	0	0	0	0	0	0	1	0	0	0	0	0	0	0	0	0	0	0	0	0	0	0	0	0	0	0	0	0	0	0	0	0	0	0	0	0	0	0
ENSG00000131584	ACAP3	4	20	10	23	1	7	7	0	7	5	13	9	0	0	0	0	12	0	0	0	0	0	0	0	0	0	0	0	0	63	0	4	0	0	0	0	0	1
ENSG00000169972	PUSL1	0	0	0	1	0	0	0	0	0	0	0	0	0	0	0	0	0	0	0	2	0	0	0	0	0	0	0	0	0	0	0	0	0	0	0	0	0	0
ENSG00000127054	INTS11	0	0	0	0	0	0	0	0	3	0	1	0	0	0	0	0	0	0	0	0	0	0	0	0	0	1	0	0	0	28	0	0	0	0	0	0	0	0
ENSG00000169962	TAS1R3	0	0	0	0	15	0	5	0	0	1	1	0	0	0	0	1	0	0	0	0	0	0	0	0	0	1	0	0	101	0	0	0	0	0	0	0	0	0
ENSG00000107404	DVL1	0	19	6	14	50	0	0	2	0	7	2	4	0	0	0	81	0	0	0	0	0	0	0	0	0	1	0	21	49	1	0	44	0	0	1	0	0	0
ENSG00000162576	MXRA8	218	327	227	331	309	175	73	51	65	65	27	34	0	29	299	299	0	171	17	0	212	1	2	0	12	56	72	0	174	293	175	50	0	1	3	1	0	3
ENSG00000221978	CCNL2	77	56	56	135	46	21	22	30	41	34	30	33	130	0	0	32	76	0	15	1	98	0	15	36	89	1	155	13	137	179	0	266	0	0	0	0	0	1
ENSG00000224870	AL391244.1	15	0	0	7	0	0	3	0	2	0	2	1	0	0	24	0	0	0	0	0	0	0	0	0	0	0	0	0	0	0	0	0	0	0	0	0	0	0
ENSG00000242485	MRPL20	32	71	73	35	155	46	14	7	16	20	9	21	0	1	0	38	17	0	4	0	0	0	0	69	0	1	55	0	2	122	31	77	0	0	0	0	0	0
ENSG00000235098	ANKRD65	0	1	0	1	0	1	0	0	0	0	0	0	0	0	0	1	0	0	0	0	0	0	0	0	0	0	0	0	0	0	0	0	0	0	0	0	0	0
ENSG00000179403	VWA1	0	0	8	0	10	0	4	6	9	31	4	11	0	0	0	0	0	0	0	0	0	0	0	0	0	34	0	0	171	160	1	150	0	0	0	0	1	1
ENSG00000215915	ATAD3C	0	0	0	0	0	0	0	0	0	2	0	0	1	0	0	0	0	0	0	0	0	0	0	0	0	0	0	0	0	0	0	0	0	0	0	0	0	0
ENSG00000160072	ATAD3B	30	0	0	3	0	0	0	0	0	5	0	4	0	0	0	0	0	0	0	0	0	0	0	0	0	0	0	0	0	0	0	0	0	0	0	0	0	0
ENSG00000197785	ATAD3A	33	30	26	28	31	24	23	7	14	18	11	10	0	0	0	0	70	0	0	0	0	1	62	0	37	0	3	0	0	119	1	100	0	0	0	2	0	0
ENSG00000205090	TMEM240	0	0	0	0	0	0	0	0	0	2	0	0	0	0	0	0	0	0	0	0	0	0	0	0	0	0	0	0	0	0	0	0	0	0	0	0	0	0
ENSG00000160075	SSU72	34	30	26	31	9	7	4	6	2	8	0	13	4	0	0	4	141	0	2	0	0	0	0	0	0	0	12	0	6	1	1	0	1	1	0	0	0	0
ENSG00000215014	AL645728.1	15	0	13	6	8	0	0	0	0	0	0	0	0	0	0	0	0	0	0	0	0	0	0	9	0	0	0	0	34	0	0	34	0	0	0	0	0	0
ENSG00000228594	FNDC10	0	0	3	0	0	0	0	0	0	0	0	0	0	0	0	0	0	0	0	0	0	0	0	0	0	0	0	0	0	0	0	0	0	0	0	0	0	0
ENSG00000272106	AL691432.2	10	2	0	7	0	35	0	4	0	2	0	0	0	0	0	0	0	0	3	0	0	0	0	0	0	0	0	0	0	0	0	0	0	0	0	0	0	0
ENSG00000197530	MIB2	7	1	3	0	21	0	0	0	0	3	0	0	0	0	0	0	0	0	0	0	0	0	0	0	0	0	0	0	0	0	0	0	0	0	0	0	0	0
ENSG00000189409	MMP23B	0	0	7	0	15	0	3	0	0	0	0	0	0	0	0	0	0	0	0	0	0	0	0	0	0	0	0	0	0	0	0	1	0	0	0	0	0	0
ENSG00000248333	CDK11B	115	154	99	67	94	81	27	6	27	15	45	39	0	45	0	130	176	0	34	0	22	125	1	0	76	0	219	0	0	160	179	148	0	0	1	0	0	2
ENSG00000189339	SLC35E2B	10	37	9	10	1	12	9	1	0	12	3	5	0	0	85	0	0	0	0	0	0	1	0	0	74	0	0	0	64	46	0	7	0	0	0	1	0	0
ENSG00000215914	MMP23A	0	3	3	0	0	0	0	0	0	0	0	0	0	0	0	0	0	0	0	0	0	0	0	0	0	0	0	0	0	0	0	0	0	0	0	0	0	0
ENSG00000008128	CDK11A	0	0	0	0	0	0	0	0	1	0	0	0	0	0	2	0	0	0	0	0	0	0	0	0	0	0	0	0	0	0	0	0	0	0	0	0	0	0
ENSG00000268575	AL031282.2	0	0	0	0	0	0	0	0	0	0	0	0	0	0	0	0	0	0	0	0	0	0	0	0	0	0	0	0	0	0	0	1	0	0	0	0	0	0
ENSG00000227775	AL031282.1	1	1	0	0	1	0	0	1	1	0	1	7	0	0	0	0	1	0	6	0	0	0	0	0	1	0	0	0	0	9	0	52	0	0	0	0	0	0
ENSG00000215790	SLC35E2	12	0	4	0	0	0	3	0	0	1	0	2	0	0	5	0	0	0	0	0	0	0	0	0	0	0	0	0	0	1	0	1	0	0	0	0	0	0
ENSG00000008130	NADK	51	49	35	43	11	75	10	3	19	18	4	16	8	1	18	59	1	0	0	0	0	0	1	0	1	183	101	0	3	95	0	1	0	0	0	0	0	0
ENSG00000078369	GNB1	410	490	391	450	237	447	162	85	129	157	103	163	252	185	183	287	544	142	128	68	131	81	4	12	97	380	617	45	130	1234	186	664	1	1	1	0	0	2
ENSG00000178821	TMEM52	0	0	0	2	0	0	3	0	0	1	2	0	0	0	0	0	0	0	0	0	0	0	0	0	0	0	0	0	0	0	0	0	0	0	0	0	0	0
ENSG00000142609	CFAP74	0	0	0	0	0	0	0	0	0	0	1	0	0	0	0	0	0	0	1	0	0	0	0	0	0	0	0	0	0	0	0	0	0	0	0	0	0	0
ENSG00000233542	AL391845.2	0	0	0	1	0	0	2	1	0	0	1	0	0	0	0	0	0	0	0	0	0	0	0	0	0	0	0	0	0	23	0	1	0	0	0	0	0	0
ENSG00000187730	GABRD	0	2	0	2	0	0	1	0	1	3	0	1	0	0	0	0	7	0	0	0	1	0	0	0	0	0	2	0	1	3	0	2	0	0	0	0	0	0
ENSG00000067606	PRKCZ	0	0	2	2	0	0	0	0	0	0	0	0	0	0	0	0	0	0	0	0	0	0	0	0	0	0	0	0	0	0	0	0	0	0	0	0	0	0
ENSG00000271806	AL590822.2	1	0	0	1	0	0	0	0	0	0	0	0	0	0	0	0	0	0	0	0	0	0	0	0	0	0	0	0	0	1	0	2	0	0	0	0	0	0
ENSG00000162585	FAAP20	0	0	10	17	0	0	1	3	0	5	6	3	0	0	0	0	0	0	15	0	0	0	0	0	0	0	0	0	0	66	0	0	0	0	0	0	0	0
ENSG00000234396	AL590822.1	0	0	0	0	0	0	0	0	0	0	0	0	0	0	0	0	0	0	0	0	0	0	0	0	0	0	0	0	14	0	0	0	0	0	0	0	0	0
ENSG00000157933	SKI	70	63	70	27	53	24	18	2	12	47	3	26	24	78	33	91	73	116	0	0	9	247	0	60	62	0	80	0	0	97	171	255	0	0	0	0	0	0
ENSG00000116151	MORN1	0	0	0	0	0	0	0	0	1	0	3	1	0	0	0	4	0	0	1	0	0	0	0	0	0	0	0	0	0	0	0	0	0	0	0	0	0	0
ENSG00000269896	AL513477.1	0	3	0	0	0	0	0	0	0	0	0	0	1	0	0	0	0	0	0	0	0	0	0	0	0	0	0	0	0	0	0	0	0	0	0	0	0	0
ENSG00000272420	AL513477.2	0	1	0	0	0	0	0	0	0	0	0	0	0	0	0	0	0	0	0	0	0	0	0	0	0	0	0	0	0	30	0	0	0	0	0	0	0	0
ENSG00000157916	RER1	46	40	61	44	82	59	10	5	2	40	16	16	0	1	184	92	220	53	0	0	0	1	0	0	17	1	43	1	0	264	0	1	0	0	0	0	0	2
ENSG00000157911	PEX10	14	11	8	16	6	0	5	8	3	0	2	0	0	0	0	0	0	0	0	0	0	0	0	0	0	0	0	90	25	0	0	0	0	0	1	0	0	0
ENSG00000149527	PLCH2	0	0	0	0	0	0	0	0	0	4	1	0	0	0	0	0	0	0	0	0	0	0	0	0	0	0	0	0	0	0	0	0	0	0	0	0	0	0
ENSG00000224387	AL139246.1	0	0	0	0	0	0	0	0	0	0	0	0	0	0	0	0	0	0	0	0	0	0	0	0	0	0	0	0	0	29	0	0	0	0	0	0	0	0
ENSG00000157881	PANK4	21	7	20	17	10	0	4	2	10	1	3	6	7	0	0	0	0	0	0	0	0	0	0	0	2	2	0	0	0	6	0	0	0	0	0	0	0	0
ENSG00000272449	AL139246.5	0	1	0	0	0	11	10	6	3	2	2	0	0	0	0	0	0	0	0	0	0	0	0	0	0	0	0	0	0	1	0	0	0	0	0	0	0	0
ENSG00000157873	TNFRSF14	112	161	190	219	146	309	6	7	8	25	8	23	0	32	0	369	73	0	76	23	18	0	1	0	11	0	94	0	144	200	78	0	0	0	1	0	0	0
ENSG00000228037	AL139246.3	0	0	0	0	0	0	0	0	0	0	0	4	0	0	0	0	0	0	0	0	0	0	0	0	0	0	0	0	0	0	0	0	0	0	0	0	0	0
ENSG00000157870	FAM213B	23	6	7	0	0	0	1	0	0	4	2	1	0	0	0	0	0	0	0	0	0	0	0	0	0	0	0	1	0	0	1	147	0	0	0	0	0	0
ENSG00000142606	MMEL1	0	0	0	0	0	0	9	1	15	16	17	15	0	0	0	0	0	0	0	0	0	0	0	0	0	0	0	0	0	61	0	134	0	0	0	0	0	0
ENSG00000215912	TTC34	0	0	0	0	0	23	7	1	2	0	0	2	0	0	0	0	0	0	0	0	0	0	0	0	1	0	0	0	0	49	0	0	0	0	0	0	0	0
ENSG00000177133	LINC00982	0	0	0	0	0	0	0	0	0	0	0	0	0	0	0	0	85	0	0	0	0	0	0	0	0	0	0	0	0	0	0	0	0	0	0	0	0	0
ENSG00000142611	PRDM16	13	4	0	16	0	0	0	0	2	6	7	10	0	0	0	0	0	0	30	28	0	0	0	0	1	0	2	0	0	32	0	34	0	0	0	0	0	0
ENSG00000226286	AL008733.1	0	0	0	0	0	0	0	0	0	0	0	1	0	0	0	0	0	0	0	0	0	0	0	0	0	0	0	0	0	0	0	0	0	0	0	0	0	0
ENSG00000130762	ARHGEF16	0	0	0	1	0	0	38	30	30	59	33	35	0	2	0	0	0	0	0	0	0	0	0	0	0	1	0	0	0	294	0	182	0	0	0	0	0	0
ENSG00000162591	MEGF6	61	46	27	25	22	42	5	4	4	5	1	8	0	0	73	215	0	0	0	0	42	0	1	0	0	0	39	0	54	44	73	44	1	0	1	1	0	0
ENSG00000158109	TPRG1L	49	22	39	48	17	18	8	11	18	16	10	5	0	2	0	69	281	0	0	0	0	0	2	8	0	0	0	104	14	31	0	0	0	0	0	0	0	0
ENSG00000116213	WRAP73	26	50	34	59	11	26	7	1	7	9	5	13	0	0	0	0	0	0	65	41	0	37	0	0	0	0	106	0	0	33	73	35	0	0	0	0	0	0
ENSG00000078900	TP73	0	4	2	12	0	0	1	0	0	0	1	2	0	0	0	0	0	0	0	0	0	0	0	0	0	0	0	0	0	0	0	0	0	0	0	0	0	0
ENSG00000227372	TP73-AS1	20	27	1	33	0	0	4	0	4	10	13	4	0	0	0	64	0	14	0	0	0	0	0	16	0	0	0	0	0	2	0	1	0	0	0	0	0	0
ENSG00000235169	SMIM1	0	0	0	0	0	0	0	0	1	2	0	0	0	0	0	0	0	0	0	0	0	0	0	0	0	0	0	0	0	0	0	0	0	0	0	0	0	0
ENSG00000130764	LRRC47	8	11	0	3	0	0	1	0	0	0	0	2	0	0	0	0	0	0	0	0	0	0	0	0	0	0	0	0	0	27	0	0	0	0	0	0	0	0
ENSG00000272153	AL365330.1	0	0	0	0	0	0	2	0	0	0	0	0	0	0	0	0	0	0	0	0	0	0	0	0	0	0	0	0	0	0	0	0	0	0	0	0	0	0
ENSG00000116198	CEP104	42	26	13	36	3	16	11	12	5	13	11	4	0	0	27	0	0	0	0	0	0	5	0	35	0	2	0	0	0	119	49	49	0	0	0	0	0	0
ENSG00000169598	DFFB	2	0	4	7	6	0	0	0	0	0	0	0	0	0	0	0	0	0	0	0	0	0	0	0	0	0	0	0	1	0	0	0	0	0	0	0	0	0
ENSG00000198912	C1orf174	15	57	38	52	34	82	4	15	9	5	18	20	0	0	146	0	16	38	0	1	0	0	0	0	98	0	12	0	177	118	0	0	1	0	0	0	0	1
ENSG00000236423	LINC01134	0	4	0	6	0	0	0	1	0	0	0	0	0	0	0	0	0	0	0	0	0	0	0	0	0	0	0	0	0	0	0	0	0	0	0	0	0	0
ENSG00000233304	LINC01346	0	0	0	0	0	0	0	0	0	1	0	0	0	0	0	0	0	0	0	0	0	0	0	0	0	0	0	0	0	0	0	0	0	0	0	0	0	0
ENSG00000229280	EEF1DP6	4	41	20	1	47	13	13	26	9	14	17	25	12	0	130	0	0	19	0	0	0	0	0	0	0	1	7	0	0	195	0	1	0	0	1	1	0	0
ENSG00000235054	LINC01777	0	0	0	0	0	0	0	0	0	0	0	0	0	0	0	0	0	0	0	0	0	0	0	0	0	0	0	0	0	0	0	1	0	0	0	0	0	0
ENSG00000232596	LINC01646	0	0	0	1	0	0	0	0	0	0	0	0	0	0	0	0	0	0	0	0	0	0	0	0	0	0	0	0	0	0	0	0	0	0	0	0	0	0
ENSG00000196581	AJAP1	0	0	0	0	9	0	3	0	0	0	0	2	0	0	0	0	0	0	0	0	0	0	0	0	0	0	0	0	0	0	0	0	0	0	0	0	0	0
ENSG00000131697	NPHP4	35	20	24	29	50	22	5	0	4	0	3	1	1	0	0	0	0	0	0	77	0	0	1	0	0	0	13	0	0	0	0	38	0	0	0	0	0	0
ENSG00000069424	KCNAB2	151	135	143	147	184	117	3	0	5	9	3	0	208	2	0	112	59	0	51	0	78	10	0	1	25	3	106	0	1	107	0	93	0	0	0	0	0	1
ENSG00000116254	CHD5	0	0	2	7	9	0	0	0	0	3	2	1	0	0	0	0	0	0	0	0	0	0	0	0	0	0	0	0	0	5	5	24	0	0	0	0	0	0
ENSG00000116251	RPL22	543	351	457	566	459	697	122	122	126	112	108	136	143	114	128	318	330	43	248	36	65	215	63	20	346	37	681	23	342	833	123	565	0	4	3	0	1	8
ENSG00000158286	RNF207	32	7	7	0	5	0	31	0	8	8	26	0	0	0	0	0	0	0	0	0	0	0	0	0	0	0	0	0	0	34	0	18	0	0	0	0	0	0
ENSG00000116237	ICMT	19	62	59	34	24	6	20	18	28	28	17	7	1	0	0	45	0	0	3	0	0	0	0	0	0	0	41	0	0	115	0	0	0	0	0	0	0	0
ENSG00000225077	LINC00337	0	0	0	0	0	0	3	0	0	0	0	0	0	0	0	0	0	0	0	0	0	0	0	0	0	0	0	0	0	0	0	0	0	0	0	0	0	0
ENSG00000173673	HES3	0	0	0	0	0	0	0	0	0	0	0	0	0	0	0	0	0	0	0	0	0	0	0	0	0	0	0	0	0	1	0	0	0	0	0	0	0	0
ENSG00000158292	GPR153	11	24	4	12	38	1	8	3	3	4	5	2	0	0	0	0	0	37	89	0	0	0	0	0	0	0	1	0	0	49	0	0	0	0	0	0	0	0
ENSG00000097021	ACOT7	14	2	10	3	40	0	4	0	6	15	3	3	0	1	0	18	0	0	0	0	0	0	0	0	0	0	0	0	0	19	26	38	0	0	0	0	0	0
ENSG00000271746	AL031848.2	0	0	0	0	0	0	0	0	0	0	0	0	0	0	0	0	0	0	0	0	0	0	0	0	0	0	0	0	24	0	0	0	0	0	0	0	0	0
ENSG00000069812	HES2	12	14	3	16	1	1	10	3	4	10	8	10	0	0	0	0	0	0	0	0	0	0	0	1	6	0	1	0	9	108	0	0	0	1	0	0	0	0
ENSG00000187017	ESPN	0	0	0	0	0	1	11	2	3	5	10	7	0	0	1	0	0	0	0	0	0	0	0	0	0	0	0	0	20	7	0	74	0	0	0	0	0	0
ENSG00000215788	TNFRSF25	33	22	25	15	16	11	22	32	12	32	9	14	25	1	250	0	28	0	0	40	0	0	1	0	0	9	0	31	132	212	4	137	0	0	0	0	0	0
ENSG00000171680	PLEKHG5	8	3	1	1	15	0	9	7	6	4	11	18	113	0	53	28	1	0	0	0	0	0	0	1	0	0	1	0	35	37	0	55	0	0	0	1	0	0
ENSG00000162408	NOL9	70	40	24	61	67	74	10	16	15	28	10	9	0	107	42	70	0	0	0	0	0	0	0	0	237	0	33	33	41	86	83	76	0	0	0	0	0	0
ENSG00000229519	AL591866.1	72	141	168	236	128	146	71	42	81	91	100	113	29	18	67	46	103	89	98	3	25	30	4	0	108	3	123	101	146	312	103	289	0	2	0	1	0	2
ENSG00000204859	ZBTB48	0	0	0	1	0	0	0	0	0	0	0	0	0	0	0	0	0	0	0	0	0	0	0	0	0	0	0	0	0	16	0	0	0	0	0	0	0	0
ENSG00000162413	KLHL21	22	22	36	24	69	40	11	4	11	7	8	6	0	0	25	0	171	20	0	25	24	1	0	0	1	0	0	0	0	0	0	118	0	0	0	0	0	0
ENSG00000116273	PHF13	2	9	11	18	5	0	4	3	14	12	7	2	1	1	0	0	0	0	0	0	0	0	0	0	0	0	0	0	0	66	0	0	0	0	0	0	0	0
ENSG00000041988	THAP3	0	8	3	0	14	27	1	8	5	5	1	0	0	0	0	0	0	0	25	0	0	0	0	0	0	0	0	0	68	8	0	0	0	0	0	0	0	0
ENSG00000007923	DNAJC11	0	16	0	22	0	17	0	1	5	9	1	0	0	0	0	0	0	0	0	0	0	0	0	0	8	0	28	0	1	1	0	0	0	0	0	0	0	0
ENSG00000228750	LINC01672	0	0	0	0	0	0	0	0	0	0	0	0	0	0	0	0	0	0	0	0	0	0	0	0	0	0	1	0	0	0	0	0	0	0	0	0	0	0
ENSG00000171735	CAMTA1	62	35	76	78	71	52	12	6	22	14	13	15	0	0	0	173	140	0	0	0	0	0	2	0	0	3	26	0	59	54	88	67	2	0	1	0	0	1
ENSG00000269978	AL359881.1	0	0	0	0	0	0	3	0	3	0	0	0	0	0	0	0	0	0	0	0	0	0	0	0	0	0	0	0	0	0	0	0	0	0	0	0	0	0
ENSG00000049245	VAMP3	126	141	186	124	65	59	41	47	25	80	16	19	2	133	270	35	173	33	0	46	14	17	3	29	4	2	164	77	20	312	94	141	0	1	0	0	1	2
ENSG00000269925	Z98884.2	0	0	3	0	0	0	0	0	0	0	0	0	0	0	0	0	0	0	0	0	0	0	0	0	0	0	0	0	0	0	0	0	0	0	0	0	0	0
ENSG00000049246	PER3	149	18	84	138	36	100	7	0	15	19	14	3	8	50	31	3	279	203	33	0	0	0	0	0	0	0	3	0	66	145	0	1	0	0	0	1	0	0
ENSG00000049247	UTS2	20	30	23	38	64	91	0	0	0	4	0	0	0	0	0	0	0	0	0	0	0	0	0	0	0	0	0	0	0	0	0	0	0	0	0	0	0	0
ENSG00000049249	TNFRSF9	0	9	9	11	12	13	1	1	0	2	0	2	0	0	1	0	0	0	0	0	1	0	0	0	0	1	1	0	0	0	0	1	0	0	0	0	0	0
ENSG00000116288	PARK7	81	130	136	87	163	67	36	26	34	68	40	67	88	0	55	19	177	0	137	5	0	121	0	0	73	4	101	0	23	149	120	208	0	0	0	1	0	3
ENSG00000284747	AL034417.4	0	0	0	0	0	0	0	0	0	0	1	0	0	0	0	0	0	0	0	0	0	0	0	0	0	0	1	0	0	0	0	0	0	0	0	0	0	0
ENSG00000284716	AL034417.3	0	0	0	0	1	0	1	0	0	3	2	1	0	0	0	0	0	0	67	0	0	0	0	0	0	0	1	0	0	0	0	1	0	0	0	0	0	0
ENSG00000116285	ERRFI1	18	19	36	27	34	92	37	43	69	26	30	52	82	108	0	172	0	9	30	0	0	52	1	0	21	1	74	0	97	194	0	442	0	0	0	0	0	0
ENSG00000232848	AL034417.1	0	2	1	0	0	0	0	0	0	0	0	1	1	0	0	1	0	0	0	0	0	0	0	0	0	0	0	0	0	0	0	0	0	0	0	0	0	0
ENSG00000227634	LINC01714	0	0	0	0	0	0	0	0	0	0	0	0	0	10	0	0	0	0	0	0	0	0	0	0	0	0	0	0	0	0	0	0	0	0	0	0	0	0
ENSG00000162426	SLC45A1	0	0	0	0	0	0	0	0	3	0	1	0	0	0	0	0	0	0	0	0	0	0	0	0	0	0	0	0	0	0	0	0	0	0	0	0	0	0
ENSG00000142599	RERE	123	110	158	91	143	194	26	41	74	65	36	51	73	1	90	426	92	135	152	136	38	1	4	0	11	1	95	0	31	156	123	609	0	0	0	1	0	1
ENSG00000232912	AL096855.1	0	1	0	0	0	0	0	0	0	0	0	0	0	0	0	0	0	0	0	0	0	0	0	0	0	1	0	0	0	0	0	0	0	0	0	0	0	0
ENSG00000221083	SNORA77	0	0	4	7	0	25	0	0	0	4	1	2	0	0	0	0	0	0	0	0	0	0	0	0	0	0	0	0	0	0	0	0	0	0	0	0	0	0
ENSG00000224315	RPL7P7	0	1	0	0	0	0	0	0	0	0	0	0	0	0	0	0	0	0	0	0	0	0	0	0	0	0	0	0	0	0	0	0	0	0	0	0	0	0
ENSG00000226545	AL357552.1	3	7	11	5	12	2	1	0	1	3	1	2	1	0	1	3	5	0	0	0	4	0	0	0	1	0	11	0	2	20	0	3	0	0	0	0	0	2
ENSG00000074800	ENO1	584	543	477	525	675	356	130	126	173	251	159	173	150	232	150	204	229	200	54	61	79	73	2	82	134	337	545	302	282	1523	476	740	1	1	3	101	1	48
ENSG00000238249	HMGN2P17	1	0	0	0	0	0	0	0	0	0	0	0	0	0	0	0	0	0	0	0	0	0	0	0	0	0	0	0	0	1	0	0	0	0	0	0	0	0
ENSG00000232208	AL139415.1	15	8	7	0	0	6	13	4	0	7	5	9	0	0	0	45	188	0	0	0	0	0	0	0	0	0	0	0	0	1	26	0	0	0	0	0	0	0
ENSG00000142583	SLC2A5	33	30	17	60	71	28	0	4	0	4	2	9	0	0	78	37	293	0	0	0	0	0	0	0	0	0	2	0	1	0	0	0	0	0	0	1	0	1
ENSG00000180758	GPR157	2	11	19	3	0	54	20	5	25	22	22	20	221	0	0	0	0	0	33	0	0	1	0	0	23	0	43	0	0	107	0	30	0	0	0	0	0	2
ENSG00000228526	MIR34AHG	8	31	12	36	25	66	6	0	1	1	3	0	2	0	0	0	0	0	0	0	0	0	0	0	0	1	0	0	0	0	19	0	0	0	0	0	0	0
ENSG00000234546	LINC01759	8	0	6	0	0	0	0	0	0	0	0	1	0	0	0	0	0	0	0	0	0	0	0	0	0	0	1	0	0	0	0	25	0	0	0	0	0	0
ENSG00000049239	H6PD	57	88	95	90	114	107	8	10	19	53	11	12	62	4	211	142	378	18	15	0	138	2	1	1	11	1	80	0	68	208	1	113	0	1	0	0	0	0
ENSG00000171621	SPSB1	0	3	2	0	4	3	5	0	0	0	1	0	0	0	0	5	0	0	0	0	0	0	0	0	0	0	24	0	0	17	1	0	0	0	0	0	0	0
ENSG00000284693	AL928921.2	0	0	3	0	23	0	0	0	0	0	0	2	0	0	43	0	0	0	0	0	0	0	0	0	0	0	0	0	0	0	0	0	0	0	0	0	0	0
ENSG00000171612	SLC25A33	9	24	18	24	24	97	18	27	8	9	5	10	0	0	0	0	1	0	0	42	0	0	1	0	0	0	1	0	0	121	0	147	0	0	0	1	0	0
ENSG00000188807	TMEM201	28	16	27	0	26	24	6	4	9	4	2	10	0	0	0	0	0	0	0	0	0	0	0	0	0	0	0	0	0	25	0	2	0	0	0	0	0	0
ENSG00000171608	PIK3CD	50	79	58	66	77	95	3	6	0	7	0	15	0	0	4	43	0	0	0	46	0	0	0	0	76	2	104	0	0	168	0	40	0	0	2	0	0	0
ENSG00000179840	PIK3CD-AS1	0	0	0	5	0	0	0	0	0	0	0	0	0	0	0	0	0	0	0	0	0	0	0	0	0	0	0	0	0	0	0	0	0	0	0	0	0	0
ENSG00000233268	AL691449.1	0	6	0	1	0	0	0	0	0	0	0	0	0	0	0	0	0	0	0	0	0	0	0	0	0	0	0	0	0	0	0	0	0	0	0	0	0	0
ENSG00000231789	PIK3CD-AS2	25	3	4	0	0	0	0	0	1	1	0	0	0	0	0	0	0	0	0	0	0	0	0	0	0	0	0	0	0	0	0	0	0	0	0	0	0	0
ENSG00000171603	CLSTN1	45	56	83	89	61	90	61	59	69	97	59	56	1	37	48	156	110	24	20	0	46	0	2	54	20	30	22	1	102	387	49	198	0	1	1	0	0	0
ENSG00000178585	CTNNBIP1	0	44	83	50	36	34	20	5	15	33	26	23	0	0	0	0	0	0	0	0	0	0	0	73	0	0	0	111	1	170	0	72	0	0	0	0	0	0
ENSG00000162441	LZIC	28	23	0	9	27	13	3	10	3	12	3	8	0	0	0	0	0	0	0	0	0	0	0	0	0	0	35	0	0	0	0	38	0	0	0	0	0	0
ENSG00000228150	AL357140.2	0	1	0	0	0	0	0	0	0	0	0	0	0	0	0	0	0	0	0	0	0	0	0	0	0	0	0	0	0	0	0	0	0	0	0	0	0	0
ENSG00000173614	NMNAT1	18	7	14	15	44	4	1	7	7	1	1	7	1	0	0	0	1	27	0	0	0	0	0	0	2	0	23	0	2	37	0	4	0	0	0	0	0	0
ENSG00000202415	RN7SKP269	0	1	0	0	0	0	0	0	0	0	0	0	0	0	0	0	0	0	0	0	0	0	0	0	0	0	0	0	0	0	0	0	0	0	0	0	0	0
ENSG00000162444	RBP7	64	31	49	71	78	56	0	0	3	0	0	0	1	1	115	65	0	2	0	113	0	31	1	0	0	1	105	76	48	62	0	0	0	0	0	0	0	0
ENSG00000130939	UBE4B	78	67	89	71	114	30	14	6	14	40	12	16	0	29	92	0	0	34	0	61	73	0	1	0	38	1	61	0	78	1	0	186	0	0	0	0	0	0
ENSG00000224340	AL590639.1	0	1	0	1	0	0	0	0	0	0	0	0	0	0	0	0	0	0	0	0	0	0	0	0	0	0	0	0	0	0	0	0	0	0	0	0	0	0
ENSG00000201746	RNU6-828P	0	0	0	0	2	0	0	0	0	1	0	0	0	0	0	0	0	0	0	0	0	0	0	0	0	0	0	0	0	9	0	0	0	0	0	0	0	0
ENSG00000054523	KIF1B	81	64	71	60	108	66	7	2	7	15	14	13	0	0	0	0	1	0	0	0	0	0	2	0	0	0	121	0	5	5	6	36	0	0	0	0	0	1
ENSG00000199562	RNU6-37P	0	0	0	0	0	0	0	0	0	0	0	0	0	0	8	1	0	0	0	0	0	0	0	0	0	0	0	0	0	0	0	0	0	0	0	0	0	0
ENSG00000284735	AL139424.3	0	0	0	0	1	0	0	0	0	0	0	0	0	0	0	0	0	0	0	0	0	0	0	0	0	0	0	0	0	0	0	0	0	0	0	0	0	0
ENSG00000284642	AL139424.2	0	0	11	0	0	25	0	0	0	0	0	0	0	0	0	0	0	0	0	0	0	0	0	0	0	0	0	0	0	0	0	0	0	0	0	0	0	0
ENSG00000142657	PGD	67	148	112	72	112	119	30	16	13	34	13	25	24	3	1	43	145	48	121	0	178	83	2	0	20	44	201	1	111	141	0	62	0	19	0	0	0	1
ENSG00000175279	CENPS	18	9	0	7	33	40	4	0	6	8	5	3	1	0	0	0	0	0	20	0	0	0	0	0	0	0	43	0	39	31	0	0	0	0	0	0	0	0
ENSG00000160049	DFFA	22	22	73	46	19	27	22	3	20	9	14	2	0	1	0	68	1	0	0	0	0	0	0	0	14	0	7	0	0	131	3	0	0	0	0	0	0	1
ENSG00000142655	PEX14	101	50	34	68	8	49	13	0	25	17	10	16	0	36	0	58	138	0	0	0	0	0	0	0	1	1	21	0	57	135	0	260	0	0	0	0	0	0
ENSG00000243267	RN7SL614P	0	0	0	0	0	0	0	0	0	0	0	0	0	0	0	0	0	0	0	2	0	0	0	0	0	0	0	0	0	0	0	0	0	0	0	0	0	0
ENSG00000130940	CASZ1	7	12	0	9	1	0	22	7	34	52	50	38	0	3	0	0	0	0	0	0	0	0	0	1	0	0	52	0	15	175	0	18	0	0	0	0	0	0
ENSG00000120948	TARDBP	125	101	119	146	130	218	40	21	36	87	34	41	0	18	52	440	25	59	0	51	54	122	3	0	85	0	37	0	19	335	0	116	0	0	1	0	2	0
ENSG00000009724	MASP2	0	0	1	0	0	0	0	0	0	0	0	0	0	0	0	0	0	0	0	0	0	0	0	0	0	0	0	0	6	0	0	0	0	0	0	0	0	0
ENSG00000116649	SRM	1	28	25	13	12	38	4	2	3	0	0	0	0	0	0	0	0	0	0	0	0	0	0	0	0	0	0	0	0	0	0	0	0	0	0	0	0	0
ENSG00000171824	EXOSC10	5	32	36	65	50	59	17	17	12	19	8	25	0	0	108	0	0	0	0	0	0	0	0	0	25	1	24	66	0	133	0	65	0	0	0	0	0	1
ENSG00000226849	AL109811.1	0	0	0	0	0	0	0	0	0	0	0	0	0	0	0	0	0	0	0	0	0	0	0	0	0	0	0	0	0	0	0	0	0	0	0	3	0	0
ENSG00000230337	AL109811.2	0	1	0	0	0	0	0	0	0	0	2	0	0	0	0	0	0	0	0	0	0	0	0	0	0	0	0	0	0	0	0	0	0	0	0	0	0	0
ENSG00000198793	MTOR	20	5	43	31	48	23	6	12	6	7	3	4	0	1	0	0	0	0	0	0	67	0	0	0	1	0	0	0	0	151	75	21	1	0	48	0	0	0
ENSG00000120942	UBIAD1	14	29	7	8	7	31	2	4	2	4	1	26	0	0	0	0	0	0	0	0	0	0	0	0	87	1	0	0	0	50	0	0	0	0	0	0	0	0
ENSG00000238199	UBE2V2P3	0	0	0	0	0	0	0	0	0	0	0	0	0	0	0	0	0	0	0	0	0	0	0	0	0	0	0	22	0	0	0	0	0	0	0	0	0	0
ENSG00000204624	DISP3	0	0	0	0	0	0	0	0	0	0	0	0	0	0	0	0	0	0	0	0	0	0	0	0	0	0	0	0	0	1	0	0	0	0	0	0	0	0
ENSG00000116661	FBXO2	0	0	0	0	0	53	2	1	1	4	2	0	0	0	0	1	0	0	0	1	0	0	0	0	0	107	0	1	100	36	121	0	0	0	0	0	0	0
ENSG00000132879	FBXO44	2	5	6	5	9	36	0	3	7	15	4	5	0	0	0	0	0	32	1	0	0	0	0	0	0	0	0	0	58	28	0	0	0	0	0	0	0	0
ENSG00000116663	FBXO6	0	3	5	0	0	11	1	0	0	3	0	0	0	0	0	0	0	0	0	0	0	0	0	0	0	0	0	0	0	0	0	0	0	0	0	0	0	0
ENSG00000116670	MAD2L2	16	32	11	22	0	6	11	10	7	8	2	8	0	0	0	0	0	0	0	0	0	1	0	0	43	0	0	0	31	0	0	81	0	0	0	0	0	0
ENSG00000162490	DRAXIN	0	0	0	0	0	5	0	0	0	0	0	0	0	0	0	0	0	0	0	0	0	0	0	0	0	0	0	0	0	0	0	62	0	0	0	0	0	0
ENSG00000177674	AGTRAP	28	38	81	30	16	86	28	8	11	32	6	16	0	1	51	0	41	0	0	34	24	0	0	0	0	0	88	0	52	56	1	0	0	0	0	0	0	1
ENSG00000177000	MTHFR	42	26	29	44	18	30	14	7	4	15	14	3	56	0	110	9	115	0	0	0	0	0	0	0	0	0	54	69	0	52	0	0	0	0	0	0	0	0
ENSG00000011021	CLCN6	9	29	33	2	24	29	3	0	1	9	7	7	0	0	50	0	0	0	0	46	0	0	1	0	34	0	0	0	232	36	0	0	0	0	0	0	0	2
ENSG00000242349	NPPA-AS1	0	0	0	0	8	0	0	5	0	0	4	0	0	0	0	0	0	0	0	0	0	0	0	0	0	0	0	0	0	0	0	0	0	0	0	0	0	0
ENSG00000116685	KIAA2013	61	54	73	88	78	32	17	12	18	34	11	11	1	11	0	34	76	1	1	0	0	0	0	0	0	2	32	0	65	200	0	87	0	0	0	0	0	0
ENSG00000083444	PLOD1	7	9	41	33	18	22	6	6	17	5	1	0	1	0	0	0	0	0	0	0	0	0	0	0	0	0	0	0	0	1	0	0	0	0	0	0	0	0
ENSG00000116688	MFN2	130	72	51	68	49	93	31	4	45	28	30	29	0	1	97	46	56	0	74	1	47	1	1	0	0	80	130	0	172	275	0	19	0	0	1	0	0	0
ENSG00000116691	MIIP	9	7	12	31	1	4	0	0	4	0	2	1	0	0	0	0	0	0	0	0	0	0	0	13	0	0	7	0	0	0	0	0	0	0	0	0	0	0
ENSG00000243539	RN7SL649P	0	0	0	0	0	0	0	0	0	1	0	0	0	0	0	0	0	0	0	0	0	0	0	0	0	0	0	0	0	0	0	0	0	0	0	0	0	0
ENSG00000120949	TNFRSF8	0	19	15	39	0	0	0	0	0	3	0	3	0	0	0	0	0	0	0	0	0	0	0	0	0	1	0	0	0	0	0	0	0	0	0	0	0	0
ENSG00000028137	TNFRSF1B	53	117	122	92	78	200	6	1	3	17	3	6	0	0	144	138	87	0	56	5	118	0	0	0	52	0	366	82	83	99	0	62	0	9	0	1	0	2
ENSG00000048707	VPS13D	15	63	43	30	47	53	23	14	8	12	14	14	60	0	0	0	0	0	0	0	127	0	0	0	0	0	36	0	0	144	117	41	0	0	0	0	0	0
ENSG00000162496	DHRS3	0	5	10	25	13	0	6	10	0	7	0	0	0	0	0	113	0	0	0	0	0	0	0	0	0	0	0	0	0	0	0	0	0	0	0	0	0	0
ENSG00000272482	AC254633.1	0	0	9	0	0	0	0	0	0	0	0	0	0	0	0	0	0	0	0	0	0	0	0	0	0	0	0	0	0	0	0	0	0	0	0	0	0	0
ENSG00000274178	PRAMEF28P	0	0	0	0	0	0	0	0	0	0	0	0	0	0	1	0	0	0	0	0	0	0	0	0	0	0	0	0	0	0	0	0	0	0	0	0	0	0
ENSG00000179412	HNRNPCL4	0	0	2	0	0	0	0	0	0	0	0	0	0	0	0	0	0	0	0	0	0	0	0	0	0	0	0	0	0	0	0	0	0	0	0	0	0	0
ENSG00000207511	RNU6-771P	0	0	0	0	0	0	0	0	0	0	1	0	0	0	0	0	0	0	0	0	0	0	0	0	0	0	0	0	0	0	0	0	0	0	0	0	0	0
ENSG00000204480	PRAMEF19	0	0	0	0	0	0	0	0	0	0	0	0	0	0	0	0	0	0	0	0	0	0	0	0	0	0	0	0	0	0	0	0	14	0	0	0	0	0
ENSG00000162493	PDPN	14	87	77	42	136	98	9	0	1	32	0	7	0	0	169	0	61	0	2	33	0	0	0	0	2	0	18	0	0	192	68	43	0	0	0	0	0	0
ENSG00000237445	AL359771.1	0	0	0	0	0	0	0	0	1	0	0	0	0	0	0	0	0	0	0	0	0	0	0	0	0	0	0	0	0	0	0	0	0	0	0	0	0	0
ENSG00000116731	PRDM2	163	99	107	85	162	74	27	7	24	38	11	41	2	1	22	137	176	0	39	31	0	10	1	37	24	1	137	1	18	171	56	156	0	4	0	0	0	0
ENSG00000189337	KAZN	0	0	0	9	19	4	2	2	1	14	0	3	0	0	0	18	0	0	0	0	0	0	0	24	0	0	1	0	0	0	0	29	0	0	0	0	0	0
ENSG00000235829	TBCAP2	0	2	0	1	0	0	2	0	0	2	5	2	1	0	0	0	36	0	0	0	0	0	0	0	0	0	1	0	0	8	0	0	0	0	0	0	0	0
ENSG00000175147	TMEM51-AS1	0	0	4	0	0	0	3	3	0	0	0	0	0	0	0	0	0	0	0	0	0	0	0	0	0	0	0	0	0	0	0	0	0	0	0	0	0	0
ENSG00000171729	TMEM51	142	126	130	115	78	181	25	32	22	62	28	38	136	1	0	18	0	1	320	1	27	0	1	38	1	1	63	0	100	175	25	186	0	0	0	0	0	1
ENSG00000215720	AL035405.1	0	0	0	0	0	0	0	0	0	0	0	0	0	0	19	0	0	0	0	0	0	0	0	0	0	0	0	0	0	0	0	0	0	0	0	0	0	0
ENSG00000142621	FHAD1	49	8	26	16	30	12	2	0	0	9	5	8	65	0	0	0	0	0	0	0	0	0	0	0	0	0	0	0	1	0	0	5	0	0	0	0	0	0
ENSG00000142634	EFHD2	133	118	139	106	114	48	10	1	10	31	18	23	20	1	179	26	164	18	46	0	0	29	0	37	40	1	327	0	23	183	37	104	0	0	0	0	0	2
ENSG00000142615	CELA2A	0	1	1	0	2	0	0	0	0	0	0	0	0	0	0	0	0	0	0	0	0	0	0	0	0	0	0	0	0	1	0	0	0	0	0	0	0	0
ENSG00000132906	CASP9	23	14	2	17	0	42	0	0	17	8	2	0	0	0	0	152	0	0	0	0	0	0	2	0	0	0	0	0	0	0	0	0	0	0	0	0	0	0
ENSG00000116138	DNAJC16	65	10	25	49	36	37	0	24	6	16	11	3	40	0	0	0	66	0	0	0	0	3	0	0	0	0	0	0	0	1	0	4	0	0	0	0	0	0
ENSG00000272510	AL121992.3	0	0	0	0	0	0	0	0	0	0	0	0	0	0	0	0	0	0	0	0	0	0	0	0	0	0	1	0	0	0	0	0	0	0	0	0	0	0
ENSG00000116771	AGMAT	0	0	1	0	0	0	0	0	0	0	0	0	0	0	0	0	0	0	0	0	0	0	0	0	0	0	0	0	0	0	0	0	0	0	0	0	0	0
ENSG00000235084	CHCHD2P6	0	1	5	1	0	0	5	0	0	3	0	2	0	0	60	0	0	0	0	0	0	0	0	0	0	0	0	0	0	0	0	0	0	0	0	0	0	0
ENSG00000197312	DDI2	94	66	63	107	73	105	13	13	14	34	18	46	0	81	26	28	0	21	0	13	22	74	0	0	1	0	25	1	7	38	1	22	0	0	0	0	0	0
ENSG00000116786	PLEKHM2	24	39	15	70	16	71	0	0	1	2	3	8	0	0	16	0	0	0	14	0	0	0	0	0	0	0	13	0	30	71	0	0	0	0	0	0	0	0
ENSG00000162461	SLC25A34	0	7	3	18	0	0	2	1	0	0	1	0	0	0	0	0	0	0	0	0	0	0	0	0	0	0	0	0	0	0	0	0	0	0	0	0	0	0
ENSG00000162458	FBLIM1	8	16	29	21	87	67	6	14	17	4	5	7	0	0	50	0	0	0	0	1	0	0	0	0	14	0	0	0	17	67	0	1	0	0	0	0	0	0
ENSG00000224321	RPL12P14	8	3	4	0	4	0	0	3	0	0	0	0	0	0	0	0	3	0	0	0	0	0	0	0	0	0	1	0	2	2	0	4	0	0	0	0	0	0
ENSG00000233954	UQCRHL	57	105	142	156	149	131	148	100	135	179	163	84	0	2	44	59	39	59	71	116	0	0	4	0	84	3	144	0	111	755	1	520	0	0	0	0	1	1
ENSG00000178715	AL450998.1	148	166	99	120	213	183	57	48	34	59	24	76	0	5	1	238	107	1	466	298	0	1	0	0	0	0	166	23	317	305	32	257	0	0	0	1	0	0
ENSG00000065526	SPEN	29	44	65	47	25	21	27	41	15	19	19	28	1	0	122	0	126	0	65	22	30	1	0	0	136	1	40	36	57	153	0	68	0	0	0	0	0	0
ENSG00000270620	AL034555.1	0	0	3	1	0	0	0	0	0	0	0	0	0	0	0	0	0	0	0	0	0	0	0	0	0	0	0	0	0	0	0	0	0	0	0	0	0	0
ENSG00000116809	ZBTB17	0	0	0	0	0	0	0	0	1	0	0	0	0	0	0	0	0	0	0	0	0	0	0	0	0	0	0	0	0	0	0	0	0	0	0	0	0	0
ENSG00000183888	SRARP	0	0	0	1	0	0	11	7	6	19	2	17	0	0	0	0	0	0	0	0	0	0	1	0	61	0	0	0	3	0	0	0	0	0	0	0	0	0
ENSG00000173641	HSPB7	80	16	54	29	191	83	1	2	0	2	1	2	126	0	182	19	328	0	71	108	55	0	2	0	0	3	83	86	0	46	42	206	1	1	0	0	0	1
ENSG00000186510	CLCNKA	5	2	0	0	0	0	0	0	1	4	8	3	0	0	0	0	0	0	0	0	0	0	0	0	0	0	1	0	0	43	0	0	0	1	0	0	0	0
ENSG00000185519	FAM131C	0	0	1	0	0	0	0	0	0	0	0	0	0	0	0	0	0	0	0	0	0	0	0	0	0	0	0	0	0	0	0	0	0	0	0	0	0	0
ENSG00000142627	EPHA2	0	16	5	0	11	7	8	0	3	2	3	3	0	0	0	0	69	0	82	0	0	0	0	0	0	0	0	0	0	38	0	0	0	0	0	0	0	0
ENSG00000142632	ARHGEF19	0	13	6	2	0	0	0	19	6	13	13	16	0	1	31	0	0	0	0	0	0	0	0	0	58	0	0	0	0	84	0	0	0	0	0	0	0	0
ENSG00000237276	ANO7L1	0	14	0	0	0	0	0	0	0	0	0	0	0	0	0	0	0	0	0	0	0	0	0	0	0	0	0	0	0	0	0	61	0	0	0	0	0	0
ENSG00000132881	RSG1	0	0	0	0	0	0	0	0	0	4	0	0	0	0	0	0	0	0	0	0	0	0	0	0	0	0	0	0	0	0	0	0	0	0	0	0	0	0
ENSG00000233929	MT1XP1	1	0	8	0	3	0	0	0	0	0	0	3	1	0	0	0	0	0	0	0	0	0	0	0	0	0	82	0	2	1	0	1	0	0	0	0	0	0
ENSG00000037637	FBXO42	29	37	22	15	12	11	15	4	8	23	4	10	0	0	106	15	0	0	0	0	0	0	1	0	0	1	45	0	0	1	0	96	0	0	0	0	0	0
ENSG00000055070	SZRD1	172	131	66	142	169	93	26	17	44	89	24	49	159	1	140	96	121	14	141	55	66	174	6	0	24	2	70	0	34	300	156	160	1	1	0	0	0	0
ENSG00000226457	AL358794.1	20	21	42	24	21	12	5	4	2	4	10	8	3	0	4	22	0	1	3	0	5	3	0	0	7	56	35	9	33	41	16	42	0	0	1	0	0	0
ENSG00000187144	SPATA21	1	0	0	0	0	0	0	0	0	0	0	0	0	0	0	0	0	0	0	0	0	0	0	0	0	0	0	0	0	0	0	0	0	0	0	0	0	0
ENSG00000157191	NECAP2	133	117	112	96	128	192	5	3	12	31	9	27	0	1	42	76	395	7	0	0	212	0	1	26	0	0	141	1	51	125	1	104	1	0	0	0	4	1
ENSG00000226029	LINC01772	3	2	0	0	2	0	3	0	0	1	0	0	71	0	0	0	0	0	0	0	0	0	0	0	0	0	0	0	1	0	0	0	0	0	0	0	0	0
ENSG00000080947	CROCCP3	16	10	4	0	1	63	0	0	2	5	0	1	0	0	0	0	0	0	0	0	3	0	0	0	0	1	0	0	12	11	0	2	0	0	0	0	0	0
ENSG00000224174	AL137802.1	0	4	0	9	0	0	0	0	1	0	4	1	0	0	0	0	0	0	0	0	48	0	0	0	1	0	36	0	0	36	0	0	0	0	0	0	0	0
ENSG00000219481	NBPF1	147	112	96	147	126	149	21	8	10	8	12	25	54	3	6	20	0	66	0	1	19	0	0	0	0	0	1	7	52	17	0	4	0	0	0	0	0	0
ENSG00000215908	CROCCP2	3	23	40	9	11	18	6	4	2	11	10	1	0	2	0	0	0	0	0	1	0	0	0	0	0	1	42	0	13	81	0	128	0	0	0	0	0	1
ENSG00000186301	MST1P2	1	14	21	0	0	0	1	0	4	0	1	0	0	0	0	0	0	0	0	0	0	0	0	0	0	0	0	198	0	50	0	90	0	0	1	0	0	0
ENSG00000236698	EIF1AXP1	35	7	18	17	11	34	9	0	11	13	21	6	0	0	0	0	0	0	0	0	4	0	0	0	0	0	15	0	0	35	0	102	0	0	0	0	0	0
ENSG00000279151	AL021920.1	0	0	0	0	0	0	0	0	0	1	0	0	0	0	0	0	0	0	0	0	0	0	0	0	0	0	0	0	0	0	0	2	0	0	0	0	0	0
ENSG00000058453	CROCC	5	24	29	24	0	0	7	5	2	4	7	3	0	0	0	0	1	0	0	0	0	0	0	0	0	0	0	0	0	0	0	0	0	0	0	0	0	0
ENSG00000207389	RNU1-4	0	0	0	4	0	0	0	0	0	0	0	0	0	0	0	0	0	0	0	0	0	0	0	0	0	0	0	0	0	0	0	0	0	0	0	0	0	0
ENSG00000186715	MST1L	1	0	0	0	11	0	2	0	1	0	0	0	0	0	0	0	0	0	0	0	0	0	0	24	0	0	0	0	0	0	0	0	0	0	0	0	0	0
ENSG00000238142	BX284668.5	24	21	16	6	1	1	5	0	6	0	1	0	0	0	0	0	0	0	0	0	0	0	0	0	0	0	4	0	0	0	5	0	0	0	0	0	0	0
ENSG00000159363	ATP13A2	0	4	14	0	31	0	10	0	1	4	4	0	0	0	0	0	0	0	0	0	0	0	0	0	0	0	0	0	0	3	0	0	0	0	0	0	0	0
ENSG00000117118	SDHB	117	80	47	102	96	55	19	9	14	16	8	6	39	30	39	0	18	0	0	0	0	211	0	0	0	2	0	0	34	67	0	72	0	0	0	0	0	0
ENSG00000117115	PADI2	52	26	22	46	0	28	223	121	301	296	243	273	2	12	0	2	0	1	0	2	0	0	0	25	0	36	4	0	49	1354	4	896	0	1	0	0	0	0
ENSG00000204362	AL590644.1	0	0	0	0	0	0	1	0	0	0	0	0	0	0	0	0	0	0	0	0	0	0	0	0	0	0	0	0	0	0	0	0	0	0	0	0	0	0
ENSG00000282843	AL590644.3	0	0	0	0	0	0	0	0	0	0	0	0	0	0	0	0	0	0	0	0	0	0	0	0	0	0	1	0	0	0	0	0	0	0	0	0	0	0
ENSG00000142623	PADI1	0	0	0	0	0	0	1	0	0	0	5	0	0	0	0	0	0	0	0	0	0	0	1	0	0	0	0	0	0	0	0	53	0	0	0	0	0	0
ENSG00000159339	PADI4	0	0	0	0	0	0	0	0	0	0	2	0	0	0	0	0	0	0	0	0	0	0	0	0	0	0	0	0	0	0	0	0	0	0	0	0	0	0
ENSG00000179051	RCC2	90	79	76	75	88	65	53	24	32	51	20	36	0	1	86	0	90	1	0	0	0	0	0	0	37	1	62	0	35	375	2	142	0	1	0	1	0	1
ENSG00000074964	ARHGEF10L	32	79	70	62	57	96	26	8	11	12	25	28	84	0	149	0	0	0	19	0	0	0	0	0	0	52	27	0	78	141	0	0	0	0	0	1	0	0
ENSG00000117154	IGSF21	0	0	0	0	0	0	0	0	4	1	4	0	5	0	0	0	0	0	0	0	0	0	0	42	0	0	30	0	0	45	0	0	0	0	0	0	0	0
ENSG00000179023	KLHDC7A	7	0	0	0	0	0	0	0	2	1	2	0	0	0	0	0	0	0	0	0	0	0	0	0	0	0	0	0	0	0	0	1	0	0	0	0	0	0
ENSG00000235282	DYNLL1P3	0	0	0	0	0	0	0	0	0	0	0	0	0	0	0	0	0	0	0	0	0	0	0	0	0	0	0	0	0	0	0	2	0	0	0	0	0	0
ENSG00000009709	PAX7	0	0	0	0	7	0	0	0	1	0	3	0	0	0	0	0	0	0	0	0	0	0	0	0	0	0	0	0	0	12	0	0	0	0	0	0	0	0
ENSG00000159423	ALDH4A1	81	46	47	34	30	16	45	50	30	37	33	29	0	1	5	0	0	0	39	0	50	0	0	32	1	0	40	0	0	274	166	38	0	2	0	0	0	1
ENSG00000169991	IFFO2	0	20	1	13	0	23	14	9	3	3	2	1	106	0	0	0	0	0	0	0	0	0	0	0	0	0	0	0	0	1	106	86	0	0	0	0	0	0
ENSG00000127481	UBR4	15	14	30	23	19	1	0	6	4	14	5	3	0	0	0	0	0	0	0	0	0	0	0	0	1	0	45	0	0	88	166	0	0	0	0	0	0	0
ENSG00000230424	AL035413.1	0	0	0	9	0	6	0	0	0	0	0	0	0	0	0	0	0	0	0	0	0	0	0	0	0	0	0	0	0	0	0	0	0	0	0	0	0	0
ENSG00000127463	EMC1	61	29	31	28	26	22	8	2	6	9	17	8	0	0	0	157	0	64	39	0	30	0	1	0	0	0	25	0	0	13	0	2	0	0	0	0	0	0
ENSG00000053372	MRTO4	15	20	28	27	25	41	8	24	18	10	2	10	0	2	0	73	141	0	0	0	0	0	2	0	0	0	1	0	0	36	0	22	0	0	0	0	0	0
ENSG00000211454	AKR7L	0	0	2	10	0	0	0	2	4	3	1	0	0	0	1	1	119	0	0	0	0	0	0	0	0	0	1	0	0	0	0	0	0	0	0	0	0	0
ENSG00000162482	AKR7A3	0	5	0	4	0	0	20	15	21	1	22	14	0	0	42	0	0	0	0	0	0	0	0	0	0	0	0	0	1	0	0	0	0	0	0	0	0	0
ENSG00000053371	AKR7A2	17	65	33	39	39	36	5	0	2	19	16	14	0	33	0	0	0	0	0	0	0	49	1	0	0	0	0	0	0	105	0	1	0	1	0	0	0	0
ENSG00000200403	RNU6-1099P	0	0	0	0	0	0	0	0	0	0	0	2	0	0	0	3	0	0	0	0	0	0	0	0	0	0	0	0	0	0	0	0	0	0	0	0	0	0
ENSG00000077549	CAPZB	207	279	196	285	134	114	64	9	31	110	38	41	181	41	28	111	55	1	162	8	0	74	1	68	9	3	312	1	61	310	226	253	0	0	0	0	0	2
ENSG00000173436	MINOS1	75	75	55	99	65	108	9	9	18	17	14	19	0	1	159	1	0	0	0	0	0	0	0	1	20	0	28	53	4	110	0	355	0	0	0	0	0	0
ENSG00000226396	AL031727.1	894	963	889	997	755	850	629	520	630	654	611	623	326	163	264	205	241	122	409	7	103	55	4	170	558	129	490	119	506	3597	408	2159	2	12	2	1	4	3
ENSG00000158747	NBL1	159	164	184	181	184	161	16	22	13	47	15	29	11	35	192	290	0	146	68	23	237	10	3	0	1	0	74	4	15	255	117	171	0	1	1	0	0	1
ENSG00000162542	TMCO4	33	30	31	29	18	2	7	2	3	9	9	0	1	3	0	53	58	0	0	1	0	0	0	0	0	0	31	0	156	79	0	111	0	0	0	0	0	0
ENSG00000235434	AL391883.1	0	0	0	0	0	0	0	0	0	0	0	0	0	0	0	0	0	0	0	0	0	0	0	0	0	0	17	0	0	0	0	0	0	0	0	0	0	1
ENSG00000169914	OTUD3	5	0	0	14	0	0	0	0	1	1	0	0	0	0	0	0	0	0	86	0	0	1	0	0	0	2	0	0	331	0	0	0	0	0	0	0	0	0
ENSG00000188257	PLA2G2A	0	2	2	4	25	0	0	0	0	7	0	0	0	2	36	75	106	52	0	0	0	0	0	0	0	0	0	1	0	0	280	102	0	0	0	0	0	0
ENSG00000127472	PLA2G5	0	0	0	0	0	1	0	0	0	0	0	0	0	0	0	0	0	0	0	0	0	0	0	0	0	0	0	0	0	0	0	0	0	0	0	0	0	0
ENSG00000158786	PLA2G2F	0	0	0	0	0	0	2	0	0	0	1	0	0	0	0	0	0	0	0	0	0	0	0	0	0	0	0	0	0	0	0	0	0	0	0	0	0	0
ENSG00000187980	PLA2G2C	0	0	0	0	0	0	0	0	0	0	0	0	0	0	0	0	0	0	0	0	0	0	0	0	0	0	0	0	0	1	0	0	0	0	0	0	0	0
ENSG00000225986	UBXN10-AS1	0	9	0	5	0	0	5	0	0	1	0	0	0	0	0	0	0	0	0	0	0	0	0	0	0	0	0	0	0	0	0	0	0	0	0	0	0	0
ENSG00000162543	UBXN10	13	0	0	0	0	0	0	0	1	4	0	1	0	0	0	0	0	0	0	0	0	0	0	0	0	0	0	0	0	0	0	0	0	0	0	0	0	0
ENSG00000162545	CAMK2N1	45	83	98	83	77	63	200	118	181	122	234	164	22	3	96	21	287	0	111	0	29	282	72	41	131	39	72	17	215	1482	87	931	1	22	0	0	1	1
ENSG00000090432	MUL1	18	46	61	23	60	64	6	8	5	13	16	17	0	0	0	17	0	0	0	0	0	0	0	0	1	0	25	0	2	28	100	50	0	0	0	0	0	0
ENSG00000183114	FAM43B	0	7	12	5	0	0	0	0	0	0	0	6	0	0	25	0	0	0	0	0	61	0	0	0	0	0	0	0	0	0	0	0	0	0	0	0	0	0
ENSG00000158825	CDA	0	1	1	0	0	0	0	0	1	4	0	1	0	0	0	0	0	0	0	0	272	0	0	0	0	0	2	0	0	0	0	79	0	0	0	0	0	0
ENSG00000158828	PINK1	65	42	54	25	69	31	6	8	8	22	13	13	0	0	58	0	0	0	0	0	0	0	0	0	0	0	28	0	2	62	0	154	0	0	0	1	0	0
ENSG00000117242	PINK1-AS	0	0	4	0	0	0	8	0	0	0	0	6	0	0	0	74	0	0	0	0	0	0	0	0	0	0	0	0	0	42	0	0	0	0	0	0	0	0
ENSG00000244038	DDOST	84	117	103	104	140	216	64	49	82	110	64	94	2	2	2	59	10	34	26	30	110	0	10	22	13	3	53	1	56	242	263	290	0	0	0	0	0	0
ENSG00000117245	KIF17	0	3	0	0	0	0	0	0	0	0	0	0	0	0	0	0	0	0	0	0	0	0	0	0	0	0	31	0	0	0	0	0	0	0	0	0	0	1
ENSG00000235432	AL663074.2	0	14	0	0	0	0	5	0	3	4	0	4	0	0	0	0	0	0	0	0	0	0	0	0	0	0	0	0	0	7	0	0	0	0	0	0	0	0
ENSG00000189410	SH2D5	0	1	0	0	0	0	0	0	0	0	0	0	0	0	0	0	0	0	0	0	0	0	0	0	0	0	0	0	0	0	0	0	0	0	0	0	0	0
ENSG00000127483	HP1BP3	171	212	194	164	249	349	43	19	28	73	37	43	189	132	204	92	389	0	111	63	162	2	1	24	99	1	118	8	98	320	168	106	0	0	1	0	0	1
ENSG00000075151	EIF4G3	207	138	239	158	246	69	72	29	46	62	42	87	46	20	164	34	1	0	20	0	79	0	0	55	19	2	80	1	0	495	438	202	0	1	2	1	0	1
ENSG00000233072	RPS15AP6	0	0	1	0	13	0	0	0	0	0	0	0	0	0	0	0	0	0	0	0	0	0	0	0	0	0	0	0	0	0	0	0	0	0	0	0	0	0
ENSG00000117298	ECE1	16	18	55	39	62	94	95	93	88	46	79	62	1	63	155	119	37	0	137	0	0	0	0	0	0	1	124	1	431	471	67	248	0	1	0	2	0	2
ENSG00000231105	AL031728.1	0	0	0	0	0	0	0	0	0	0	0	0	0	0	0	0	0	0	0	0	0	0	0	0	1	0	0	0	0	0	0	0	0	0	0	0	0	0
ENSG00000236216	PPP1R11P1	0	0	0	4	5	0	0	0	0	0	0	3	0	0	0	0	0	0	0	0	0	0	0	0	0	0	0	0	0	0	0	0	0	0	0	0	0	0
ENSG00000227001	NBPF2P	0	0	0	0	0	0	3	0	0	0	1	1	0	0	0	0	0	0	0	0	0	0	0	0	0	0	0	0	0	0	0	0	0	0	0	0	0	0
ENSG00000142794	NBPF3	30	9	13	4	29	1	1	1	5	6	5	5	0	0	0	0	0	8	0	0	0	0	0	0	0	0	22	0	3	3	0	1	0	0	0	0	0	0
ENSG00000162551	ALPL	45	52	68	57	28	86	7	0	1	0	0	3	1	0	82	50	56	0	56	0	0	0	1	0	0	0	223	0	0	0	0	1	0	0	0	0	0	0
ENSG00000076864	RAP1GAP	0	0	7	0	0	0	12	23	12	31	29	8	1	0	0	0	0	0	0	0	0	0	1	0	0	0	0	0	0	73	0	172	0	0	0	0	0	0
ENSG00000090686	USP48	30	91	92	32	24	52	6	5	8	32	21	18	1	0	30	36	37	0	0	0	0	0	1	0	140	1	0	6	49	140	169	36	9	0	0	0	0	0
ENSG00000187942	LDLRAD2	0	0	0	0	0	0	0	0	0	0	0	0	0	0	0	0	0	0	0	0	0	0	0	0	0	0	0	0	33	0	0	1	0	0	0	0	0	0
ENSG00000142798	HSPG2	143	119	161	125	159	143	48	8	25	21	6	37	367	48	231	267	436	2	46	181	121	0	3	0	2	131	147	55	48	377	125	78	0	0	0	1	0	2
ENSG00000232037	AL590556.1	0	0	1	1	2	0	0	0	1	1	0	0	0	0	0	0	0	0	0	1	0	0	0	0	4	0	0	0	0	0	0	2	0	0	0	0	0	0
ENSG00000283234	AL590556.2	0	0	0	0	0	0	0	0	0	0	0	0	0	0	0	0	0	0	0	0	0	0	0	0	0	0	0	0	0	0	2	0	0	0	0	0	0	0
ENSG00000201919	RNU6-1022P	0	0	0	0	0	0	0	0	1	0	0	0	0	0	0	0	0	0	0	0	0	0	0	0	0	0	0	0	0	0	0	0	0	0	0	0	0	0
ENSG00000218510	LINC00339	64	29	15	10	43	0	2	2	3	18	0	9	0	0	1	45	0	0	0	0	1	0	0	0	0	1	31	0	0	72	0	221	0	0	0	0	0	0
ENSG00000070831	CDC42	271	363	286	283	322	163	59	42	60	75	58	51	0	26	77	475	0	60	17	144	71	144	5	45	41	34	288	230	312	278	2	158	2	0	0	0	0	2
ENSG00000230068	CDC42-IT1	3	1	0	0	0	0	0	0	0	0	2	0	0	0	0	0	0	0	0	0	0	0	0	0	0	0	0	0	0	0	0	0	0	0	0	0	0	0
ENSG00000271428	AL031281.1	0	0	0	0	0	0	0	0	3	0	0	0	0	0	0	0	0	0	0	0	0	0	0	0	0	0	0	0	0	0	0	0	0	0	0	0	0	0
ENSG00000162552	WNT4	0	3	0	0	0	0	1	0	3	0	0	2	0	0	0	0	0	0	0	0	0	0	0	0	0	0	0	0	0	0	0	0	0	0	0	0	0	0
ENSG00000184677	ZBTB40	17	32	27	39	24	10	3	1	5	13	5	21	0	0	0	3	0	1	45	26	0	1	1	0	3	0	4	0	0	35	21	66	0	0	0	0	0	1
ENSG00000173372	C1QA	0	12	0	1	1	0	0	0	0	0	0	0	0	1	0	0	0	1	0	0	0	0	0	0	0	0	0	0	0	45	0	0	0	0	0	0	0	0
ENSG00000159189	C1QC	3339	3548	3902	3762	3024	3026	96	94	59	233	27	148	1131	387	3190	2346	1479	643	1072	1564	1111	360	31	422	260	159	3362	115	922	1197	2229	880	4	6	2	11	6	24
ENSG00000173369	C1QB	483	532	649	619	614	396	9	16	4	46	9	18	17	43	239	123	131	136	167	156	355	32	1	82	4	1	554	65	127	195	506	224	1	0	1	1	0	4
ENSG00000133216	EPHB2	31	39	37	36	23	78	2	0	7	15	5	1	0	0	0	59	28	0	0	0	0	0	0	0	0	0	71	0	0	67	0	0	0	0	0	0	0	0
ENSG00000004487	KDM1A	57	51	100	66	68	43	69	74	50	42	58	76	9	22	93	9	0	66	0	37	1	0	1	26	67	1	40	16	47	293	0	145	0	0	1	0	108	22
ENSG00000169641	LUZP1	40	82	45	61	19	27	16	6	14	14	9	29	0	0	142	0	126	0	0	57	34	0	1	0	0	1	40	0	0	254	0	229	0	0	0	0	0	1
ENSG00000179546	HTR1D	0	0	0	0	0	0	3	7	0	2	0	0	0	0	0	0	0	0	0	0	0	0	0	0	0	0	0	0	0	0	0	0	0	0	0	0	0	0
ENSG00000215381	AL109936.1	0	0	0	0	0	0	0	0	0	0	1	0	0	0	0	0	0	0	0	0	0	0	0	0	0	0	0	0	0	0	0	0	0	0	0	0	0	0
ENSG00000261326	LINC01355	0	6	3	0	41	7	0	1	6	14	11	0	0	1	0	0	0	0	0	0	4	0	0	0	0	0	0	0	0	28	0	97	0	0	0	0	0	0
ENSG00000125944	HNRNPR	335	107	236	154	207	225	104	58	87	142	82	105	35	3	423	0	14	26	138	1	0	2	10	2	185	19	302	0	373	591	126	155	1	0	0	145	1	0
ENSG00000125945	ZNF436	52	23	9	28	6	48	13	4	19	16	7	10	31	1	0	34	0	50	28	0	0	0	0	33	0	0	1	0	0	55	0	191	0	0	0	1	0	0
ENSG00000249087	ZNF436-AS1	0	16	0	0	0	0	0	0	4	2	0	0	0	0	43	1	39	0	0	0	0	0	0	0	0	0	0	20	0	25	0	95	0	0	0	0	0	0
ENSG00000271420	AL109936.2	0	0	0	0	0	0	5	9	2	0	0	0	0	0	0	0	0	0	0	0	0	0	0	0	0	0	0	0	0	0	0	0	0	0	0	0	0	0
ENSG00000204219	TCEA3	37	51	30	53	13	60	174	171	150	205	154	144	7	36	50	2	0	22	0	0	1	0	0	0	116	51	4	69	2	647	26	571	1	1	0	0	1	0
ENSG00000232482	AL357134.1	0	0	0	0	0	0	1	0	1	5	0	0	0	0	0	0	0	0	0	0	0	0	0	0	0	0	0	0	0	0	0	0	0	0	0	0	0	0
ENSG00000088280	ASAP3	15	12	52	12	11	62	14	13	11	33	15	11	0	1	0	128	0	1	28	0	0	117	1	0	0	0	1	0	0	268	0	157	0	0	0	0	0	1
ENSG00000007968	E2F2	14	0	0	0	0	0	1	1	6	2	5	0	0	0	0	0	0	0	0	0	0	0	0	0	0	0	0	0	0	31	0	28	0	0	0	0	0	0
ENSG00000235052	AL021154.1	0	0	0	0	0	0	0	10	0	0	0	6	0	0	0	0	0	0	0	0	0	0	0	0	0	0	0	0	0	0	0	0	0	0	0	0	0	0
ENSG00000117318	ID3	3	0	0	7	0	0	0	3	2	0	0	5	0	0	0	0	0	0	0	0	0	0	0	0	0	0	0	0	0	5	0	0	0	0	0	0	0	0
ENSG00000142676	RPL11	584	419	415	443	484	367	164	117	142	279	185	183	203	23	700	335	222	78	284	68	99	62	40	92	174	61	312	104	200	1054	124	530	58	1	0	0	0	3
ENSG00000011007	ELOA	28	84	26	84	10	39	33	5	36	31	30	23	0	16	0	64	168	46	0	0	0	0	0	0	0	3	31	0	184	41	0	432	1	0	0	0	0	0
ENSG00000236810	ELOA-AS1	0	17	10	9	10	0	0	0	2	10	0	7	0	0	0	0	0	0	0	0	0	0	0	0	0	0	0	0	0	111	0	0	0	0	0	0	0	0
ENSG00000057757	PITHD1	49	133	102	68	55	56	18	22	12	25	27	20	0	2	34	418	0	0	0	0	108	0	5	0	18	0	46	0	36	204	1	53	0	0	0	0	0	31
ENSG00000011009	LYPLA2	14	28	16	18	33	0	27	9	18	29	63	36	1	3	42	41	53	3	0	0	50	0	0	0	44	0	4	0	0	308	0	41	0	0	0	0	1	0
ENSG00000117308	GALE	10	18	50	32	23	48	37	6	24	28	48	19	0	2	0	1	0	0	0	1	0	1	0	0	67	0	1	0	0	166	0	5	0	0	0	0	0	0
ENSG00000117305	HMGCL	0	15	40	9	44	10	10	13	5	8	2	3	0	0	0	41	1	0	0	0	0	0	0	1	18	0	105	0	1	31	55	1	0	0	0	0	0	1
ENSG00000179163	FUCA1	527	544	549	672	235	540	55	43	33	51	37	44	75	1	68	202	129	70	0	6	139	108	1	1	14	0	385	1	1	319	41	111	0	0	0	0	1	2
ENSG00000188822	CNR2	0	0	0	0	0	0	0	0	1	0	0	0	0	0	0	0	0	0	0	0	0	0	0	0	0	0	0	0	0	0	0	0	0	0	0	0	0	0
ENSG00000229106	BTBD6P1	0	0	0	0	0	0	0	0	1	0	0	0	0	0	0	0	0	0	0	0	0	0	0	0	0	0	0	0	0	0	0	0	0	0	0	0	0	0
ENSG00000230228	AL590609.2	16	19	12	17	34	9	24	7	46	30	27	24	1	0	13	0	4	0	16	2	0	0	0	0	14	2	0	1	20	292	5	89	0	0	0	0	0	0
ENSG00000189266	PNRC2	200	90	87	145	66	32	29	31	41	108	29	75	0	32	94	0	84	16	0	0	24	0	0	27	27	0	114	0	79	293	6	103	0	0	0	0	0	1
ENSG00000188529	SRSF10	154	208	169	227	130	188	68	60	81	168	88	109	3	2	0	213	128	52	1	1	266	0	0	18	202	5	60	10	116	538	173	322	0	0	1	0	1	1
ENSG00000215905	AL590609.1	2	4	2	0	2	4	3	0	3	5	2	0	0	0	0	1	1	0	0	1	3	0	0	0	0	1	10	0	0	5	3	0	0	0	0	0	0	0
ENSG00000142661	MYOM3	0	0	0	0	0	0	4	10	4	0	2	0	0	0	0	0	0	0	0	0	0	0	0	0	0	0	0	0	0	0	0	0	0	0	0	0	0	0
ENSG00000142677	IL22RA1	0	0	0	0	0	0	0	0	1	6	0	0	0	0	0	0	0	0	0	0	0	0	0	0	0	0	0	0	0	0	0	0	0	0	0	0	0	0
ENSG00000185436	IFNLR1	0	9	22	18	5	6	5	0	1	4	1	0	0	0	0	0	0	0	0	0	0	0	0	0	0	0	0	0	0	0	0	0	0	0	0	0	0	0
ENSG00000158055	GRHL3	0	0	0	0	0	0	2	2	0	5	6	0	0	0	0	0	0	0	0	0	0	0	0	0	0	0	0	0	0	3	0	0	0	0	0	0	0	0
ENSG00000001460	STPG1	7	4	9	11	1	1	3	5	7	2	4	7	0	4	0	0	8	0	0	68	0	0	0	0	0	0	0	14	0	1	0	2	0	1	0	0	0	0
ENSG00000001461	NIPAL3	0	9	29	14	0	32	11	8	19	18	20	11	57	0	0	0	40	0	0	153	0	0	3	0	0	0	1	0	223	125	15	177	0	0	1	0	0	0
ENSG00000117602	RCAN3	50	35	75	37	8	13	1	24	23	11	10	15	2	3	0	0	0	0	0	0	0	0	0	0	1	0	38	49	35	263	108	86	0	0	0	0	0	0
ENSG00000184454	NCMAP	0	0	0	0	0	1	0	0	0	0	0	0	0	0	0	0	0	0	0	0	0	0	0	0	0	0	0	0	0	0	1	0	1	0	0	0	0	0
ENSG00000133226	SRRM1	9	54	42	39	89	42	18	23	21	22	21	24	0	3	16	12	0	0	0	0	0	0	0	17	12	0	32	0	18	187	29	43	0	0	0	0	0	1
ENSG00000169504	CLIC4	127	155	139	116	58	183	68	62	68	88	56	65	41	19	190	273	340	0	37	0	0	0	3	0	56	56	165	0	0	518	61	239	0	0	1	1	0	2
ENSG00000020633	RUNX3	51	96	57	62	116	22	14	0	5	26	16	33	0	1	42	0	0	75	0	201	22	0	1	33	0	3	15	34	189	52	184	8	0	1	0	0	1	0
ENSG00000233419	AL121994.1	0	1	1	0	0	0	0	0	0	0	0	0	0	0	0	5	0	0	2	0	0	0	0	0	24	0	0	0	0	13	0	0	0	0	0	0	4	0
ENSG00000117614	SYF2	46	144	84	134	39	126	93	47	73	64	67	72	0	2	325	109	360	73	49	0	282	1	1	0	29	2	77	35	43	181	0	607	0	1	0	2	0	0
ENSG00000284602	AL031432.4	15	0	0	4	0	0	0	0	0	0	0	0	0	0	0	0	0	0	0	0	0	0	0	0	0	0	0	0	0	0	0	0	0	0	0	0	0	0
ENSG00000117616	RSRP1	137	126	155	176	147	161	26	11	34	77	35	40	0	4	73	78	129	0	14	0	0	191	0	0	1	2	47	0	240	191	200	273	0	0	0	0	0	1
ENSG00000272432	AL031432.3	0	2	0	0	0	25	0	0	0	3	1	0	1	0	0	0	0	0	0	0	0	0	0	0	0	0	0	0	0	0	0	14	0	0	0	0	0	0
ENSG00000261349	AL031432.2	0	0	0	0	0	0	1	0	0	0	0	0	0	0	0	0	0	0	0	0	0	0	0	0	0	0	0	0	0	0	0	0	0	0	0	0	0	0
ENSG00000187010	RHD	0	0	0	0	0	0	0	0	0	1	0	0	0	0	0	0	0	0	0	0	0	0	0	0	0	0	0	0	0	0	0	0	0	0	0	0	0	0
ENSG00000183726	TMEM50A	197	162	255	127	147	310	116	99	107	168	97	114	84	104	348	180	669	0	1	199	59	0	2	0	0	0	208	0	57	636	109	140	0	1	0	1	0	1
ENSG00000204178	TMEM57	44	59	102	74	56	91	74	43	59	107	63	47	85	1	107	14	0	0	69	0	39	0	1	0	36	1	39	0	0	389	0	110	0	1	0	3	0	1
ENSG00000157978	LDLRAP1	20	32	29	44	29	22	18	24	35	11	19	5	0	2	3	0	0	0	0	0	0	0	0	0	0	0	25	0	0	28	16	112	0	0	0	0	0	1
ENSG00000225643	AL606491.1	0	0	0	0	0	0	0	4	1	0	0	0	0	0	0	0	0	0	0	0	0	0	0	0	0	0	0	0	0	0	0	0	0	0	0	0	0	0
ENSG00000117643	MAN1C1	68	59	22	34	18	113	27	19	15	22	18	23	1	0	0	28	0	0	35	148	15	0	2	0	3	1	81	0	0	79	196	38	0	0	0	0	0	0
ENSG00000233478	AL031280.1	8	10	4	0	1	0	1	4	0	1	2	3	0	1	0	0	0	0	0	0	0	0	0	0	0	0	0	0	0	0	6	63	0	0	0	0	0	0
ENSG00000162430	SELENON	89	74	103	68	76	39	42	30	37	29	19	29	0	5	48	0	66	9	73	29	2	55	4	43	2	46	9	2	46	237	1	143	0	0	0	0	0	0
ENSG00000228172	AL020996.1	14	0	0	5	0	0	0	2	0	3	3	2	0	0	0	0	0	0	0	0	0	0	0	0	23	0	0	0	0	41	0	0	0	0	0	0	0	0
ENSG00000117640	MTFR1L	0	21	10	27	5	0	9	5	3	8	10	16	0	0	143	0	0	0	0	0	0	0	0	0	0	0	0	0	0	53	0	0	0	0	0	0	0	0
ENSG00000127423	AUNIP	0	0	0	6	0	0	0	0	2	2	1	0	0	0	0	0	0	0	0	0	0	0	0	0	0	0	53	0	0	85	0	0	0	1	0	0	0	0
ENSG00000182749	PAQR7	15	68	9	25	10	13	32	17	37	30	33	35	0	2	30	0	0	0	34	0	0	0	0	0	0	0	0	0	47	218	0	43	0	0	0	0	0	1
ENSG00000207302	Y_RNA	0	0	0	0	0	0	0	0	0	0	0	0	0	0	0	0	0	0	0	0	0	0	0	0	0	0	0	0	0	0	0	28	0	0	0	0	0	0
ENSG00000117632	STMN1	325	246	277	333	176	355	146	84	135	122	134	111	2	3	0	149	0	0	49	52	376	1	0	0	84	11	151	23	55	715	68	471	1	1	0	0	0	2
ENSG00000229786	SNRPFP2	2	0	2	3	4	1	2	0	0	2	2	5	0	0	1	0	0	2	0	1	0	0	0	0	8	0	4	0	1	3	0	1	0	0	0	0	2	0
ENSG00000223624	AL033528.1	1	1	0	0	0	0	0	0	1	0	0	2	0	0	0	0	0	0	0	0	0	0	0	0	0	0	0	0	0	3	0	0	0	0	0	0	0	0
ENSG00000158006	PAFAH2	0	5	3	10	9	0	0	4	4	3	1	3	0	0	0	0	0	0	0	0	0	0	0	0	0	0	15	0	0	0	58	0	0	0	0	0	0	0
ENSG00000158008	EXTL1	0	2	0	8	0	0	0	1	1	0	0	0	0	0	0	0	0	0	0	0	0	0	0	0	0	0	0	0	0	47	0	0	0	0	0	0	0	0
ENSG00000158014	SLC30A2	0	0	0	0	0	0	5	3	2	0	6	2	0	0	0	0	0	0	0	0	0	0	0	0	0	0	0	0	0	69	0	0	0	0	0	0	0	0
ENSG00000284309	AL391650.2	0	0	0	0	0	0	0	0	0	0	2	0	0	0	0	0	0	0	0	0	0	0	0	0	0	0	0	0	0	0	0	0	0	0	0	0	0	0
ENSG00000158022	TRIM63	16	0	0	0	0	0	0	0	0	0	0	0	0	0	0	0	0	0	0	0	0	0	0	0	0	0	0	0	0	0	0	0	0	0	0	0	0	0
ENSG00000175087	PDIK1L	20	26	19	18	7	21	61	24	38	66	40	40	6	2	0	0	0	0	0	0	0	0	0	19	0	27	13	0	2	152	0	42	0	0	0	0	0	0
ENSG00000197245	FAM110D	0	1	0	13	20	15	6	0	0	0	7	0	0	70	0	0	0	0	179	0	0	0	0	0	0	0	1	0	24	32	0	98	0	0	0	0	0	0
ENSG00000142684	ZNF593	1	3	0	0	6	0	2	5	0	2	6	2	0	0	0	0	1	0	0	0	0	0	0	0	32	0	2	0	0	37	0	2	0	0	0	0	0	2
ENSG00000142675	CNKSR1	0	0	0	3	0	0	1	0	1	0	0	0	0	0	0	0	0	0	0	0	0	0	0	0	0	0	0	0	0	40	0	0	0	0	0	0	0	0
ENSG00000188782	CATSPER4	0	0	0	0	0	0	0	0	1	0	0	0	0	0	0	0	0	0	0	0	0	0	0	0	0	0	0	0	0	0	0	0	0	0	0	0	0	0
ENSG00000278572	AL355877.3	0	0	0	0	0	0	0	0	3	0	0	0	0	0	0	0	0	0	0	0	0	0	0	0	0	0	0	0	0	0	0	0	0	0	0	0	0	0
ENSG00000130695	CEP85	0	6	22	13	0	0	3	4	6	19	11	13	0	0	0	0	0	0	0	0	0	0	0	0	0	0	0	0	0	1	0	0	0	0	0	0	0	0
ENSG00000142669	SH3BGRL3	1192	1580	1017	1128	1143	995	182	106	161	234	182	186	43	23	242	412	275	156	46	94	143	3	42	24	63	32	1147	0	300	964	157	868	0	2	1	0	1	5
ENSG00000158062	UBXN11	0	0	1	0	0	0	0	0	1	0	0	0	0	0	0	0	0	0	0	0	0	0	0	0	0	0	0	0	0	0	54	0	0	0	0	0	0	0
ENSG00000169442	CD52	300	314	298	180	265	179	3	14	2	25	3	5	29	0	0	6	90	0	0	0	1	2	0	74	85	0	316	1	3	3	142	7	0	0	1	0	1	2
ENSG00000176092	CRYBG2	0	0	0	0	0	0	0	0	1	0	0	0	0	0	0	0	0	0	0	0	0	0	0	0	0	0	0	0	0	0	0	0	0	0	0	0	0	0
ENSG00000225854	AL451139.1	11	13	9	22	7	16	4	8	16	13	12	6	1	4	8	3	40	0	29	13	0	3	0	0	31	0	15	1	7	36	5	34	0	0	0	1	0	0
ENSG00000131914	LIN28A	0	2	10	6	23	1	104	166	221	133	159	166	2	2	0	0	0	0	0	2	1	1	47	54	92	86	0	3	107	366	0	89	0	1	1	0	0	0
ENSG00000117682	DHDDS	20	21	10	15	48	32	5	8	13	27	7	16	0	0	0	30	0	110	3	0	1	1	0	1	0	0	0	0	0	0	1	1	0	0	0	0	0	0
ENSG00000223583	AL513365.1	8	31	17	6	17	20	4	9	2	3	9	7	0	1	4	18	7	0	1	1	0	0	0	0	3	0	19	0	15	27	4	7	0	0	0	0	0	3
ENSG00000225891	AL513365.2	0	0	0	0	0	0	0	0	0	1	0	0	0	0	0	0	0	0	0	0	0	0	0	0	0	0	0	0	0	0	0	0	0	0	0	0	0	0
ENSG00000198830	HMGN2	1	2	1	0	0	0	0	1	0	2	2	0	0	0	0	0	0	0	0	3	0	0	0	0	0	0	0	0	1	4	0	3	0	0	0	1	0	0
ENSG00000117676	RPS6KA1	144	115	77	65	78	259	19	8	38	25	16	27	44	0	0	48	0	0	0	0	0	1	0	0	82	0	182	0	45	95	18	1	0	0	0	1	0	1
ENSG00000238705	MIR1976	9	0	0	0	0	0	0	0	0	0	0	0	0	0	0	0	0	0	0	0	0	0	0	0	0	0	0	0	0	0	0	0	0	0	0	0	0	0
ENSG00000243905	RN7SL679P	0	0	0	1	0	13	0	1	0	1	1	0	0	0	0	0	0	0	0	0	0	0	0	0	0	0	0	0	0	0	0	0	0	0	0	0	0	0
ENSG00000229247	AL627313.1	1	0	0	0	0	0	0	0	1	0	1	0	0	0	0	0	0	0	0	0	0	0	0	0	0	0	0	0	0	2	0	0	0	0	0	0	0	0
ENSG00000238316	snoU13	1	0	0	1	2	0	1	0	0	1	0	0	0	0	0	0	0	0	0	0	0	0	0	0	45	0	0	0	0	0	1	0	0	0	0	0	0	0
ENSG00000235069	AL627082.1	2	2	39	34	1	18	27	47	18	18	7	5	0	0	0	0	0	0	0	0	0	0	0	0	35	0	102	1	0	86	0	56	0	0	0	0	0	1
ENSG00000260063	AL512408.1	0	0	1	4	10	0	0	0	0	5	0	1	0	0	0	0	0	0	0	0	0	0	0	0	0	0	0	0	0	7	0	0	0	0	0	0	0	0
ENSG00000117713	ARID1A	297	373	270	276	217	255	165	156	190	221	265	241	39	4	215	138	288	172	118	57	33	0	1	45	304	12	640	0	311	881	53	391	0	3	0	2	0	9
ENSG00000060642	PIGV	20	34	1	0	29	67	7	13	2	14	2	3	0	0	124	0	0	0	0	0	0	0	0	0	0	0	0	0	74	0	0	0	0	1	0	0	0	0
ENSG00000241188	RN7SL165P	3	0	0	0	0	0	0	0	0	0	0	0	0	0	0	0	0	0	0	0	0	0	0	0	0	0	0	0	0	0	0	0	0	0	0	0	0	0
ENSG00000204160	ZDHHC18	88	49	80	34	68	88	35	22	26	19	10	18	18	1	27	0	0	0	0	37	0	0	3	1	57	51	18	1	31	160	107	1	0	0	0	1	0	0
ENSG00000175793	SFN	0	1	0	1	0	1	110	52	89	92	167	106	1	3	0	0	0	0	0	0	0	0	0	1	20	0	0	0	56	895	0	419	0	44	0	64	0	0
ENSG00000142751	GPN2	7	28	38	34	34	41	46	31	42	45	48	83	0	1	0	0	32	0	99	0	0	0	0	32	9	1	0	0	228	256	0	140	0	0	0	0	0	0
ENSG00000198746	GPATCH3	24	43	23	9	22	29	18	14	24	11	15	9	54	0	0	0	0	0	0	0	0	0	0	0	0	1	44	38	0	73	0	102	0	0	0	2	0	0
ENSG00000090273	NUDC	51	104	68	46	64	70	63	73	62	111	50	59	0	3	80	80	52	0	135	0	0	0	0	0	0	1	54	35	253	749	0	55	0	0	0	0	0	2
ENSG00000175707	KDF1	7	0	0	0	0	1	18	7	27	35	9	37	1	1	0	0	0	0	0	0	1	0	0	0	143	0	0	0	0	260	0	94	0	1	0	0	0	0
ENSG00000172746	RPL12P13	23	28	16	24	11	9	8	6	5	12	13	8	46	0	0	29	0	1	0	23	0	0	0	0	1	0	81	8	0	0	0	57	0	0	0	0	0	0
ENSG00000224064	AL356390.1	0	1	0	0	1	1	0	0	0	1	0	0	0	0	3	0	0	4	0	0	1	0	0	0	1	0	4	0	0	9	1	0	0	0	0	0	0	0
ENSG00000225294	OSTCP2	0	0	3	3	0	0	0	0	0	3	6	0	0	0	0	0	0	0	0	0	0	0	0	0	0	0	0	0	0	0	0	0	0	0	0	0	0	0
ENSG00000253368	TRNP1	0	1	1	0	0	10	9	13	17	15	11	18	1	0	0	87	0	0	0	0	0	0	1	0	0	0	0	0	0	92	0	0	0	0	0	0	0	0
ENSG00000158246	FAM46B	0	0	0	0	0	0	17	7	1	12	2	2	0	0	0	0	0	0	0	0	0	0	0	0	0	0	0	0	0	30	0	0	0	0	0	0	0	112
ENSG00000090020	SLC9A1	21	26	39	55	77	30	29	33	29	41	21	37	1	53	0	1	0	0	0	0	0	0	0	0	33	76	0	0	212	369	5	198	0	0	0	0	1	0
ENSG00000229985	AL590640.2	5	0	1	0	1	2	0	0	1	1	0	2	3	0	0	0	0	0	0	0	0	0	0	0	0	0	0	0	0	6	0	0	0	15	0	0	0	0
ENSG00000214973	CHCHD3P3	0	0	0	0	0	0	0	0	0	0	3	0	0	0	0	0	0	0	0	0	0	0	0	0	0	0	0	0	0	0	0	0	0	0	0	0	0	0
ENSG00000225159	NPM1P39	1	0	1	1	0	0	0	1	0	1	1	0	0	0	0	0	0	1	0	0	0	0	0	0	0	0	0	0	0	0	0	0	0	0	0	0	0	0
ENSG00000225990	SNRPEP7	0	0	0	0	0	0	0	0	0	0	0	0	0	0	0	0	0	0	0	0	0	0	0	0	0	0	0	0	0	0	1	0	0	0	0	0	0	0
ENSG00000142784	WDTC1	41	21	69	12	25	12	12	4	11	24	13	11	1	2	1	2	29	0	0	0	1	0	53	0	123	1	13	0	0	275	0	271	0	2	0	0	0	0
ENSG00000186501	TMEM222	9	18	13	7	24	16	6	7	8	7	9	13	1	1	4	1	1	1	18	1	6	0	1	6	3	0	0	0	0	55	0	12	0	0	0	0	0	0
ENSG00000142765	SYTL1	20	10	11	17	11	6	6	5	0	6	0	4	1	0	0	0	0	0	0	0	36	0	0	0	2	43	0	0	1	66	14	97	0	0	0	0	0	0
ENSG00000142733	MAP3K6	0	10	27	13	40	0	7	0	4	6	6	4	0	0	0	0	15	0	0	0	0	0	0	0	0	0	31	0	0	7	0	1	0	0	0	0	0	0
ENSG00000142748	FCN3	0	0	2	0	0	0	3	0	0	0	0	0	0	0	0	0	0	0	0	0	0	0	0	0	0	0	36	0	0	0	0	0	0	0	0	0	0	0
ENSG00000174950	CD164L2	0	0	0	0	0	0	1	1	0	1	3	0	0	0	0	0	0	0	0	0	0	0	0	0	0	0	0	0	0	0	0	0	0	0	0	0	0	0
ENSG00000181773	GPR3	0	0	3	0	0	0	0	0	0	0	0	0	0	0	0	0	0	0	17	0	0	1	0	0	0	0	0	0	0	0	0	0	0	0	0	0	0	0
ENSG00000158195	WASF2	56	46	40	60	48	26	13	10	30	29	18	18	0	3	95	2	0	4	22	0	0	0	0	0	112	0	28	0	1	68	2	223	0	0	0	0	0	2
ENSG00000126705	AHDC1	32	66	109	60	127	72	56	42	68	54	46	33	0	2	191	78	0	57	256	1	0	2	1	0	30	0	16	0	195	352	0	34	0	0	0	0	0	1
ENSG00000000938	FGR	197	253	198	250	202	273	7	8	1	2	2	8	1	0	137	0	95	0	0	20	76	0	0	2	1	1	379	0	13	2	52	0	0	1	0	0	0	3
ENSG00000235912	AL031729.1	4	20	7	20	6	13	5	0	2	1	4	4	3	0	0	3	0	0	65	0	0	0	0	0	0	0	0	0	1	9	0	65	0	0	0	0	4	0
ENSG00000233975	LINC02574	0	0	0	0	0	0	1	0	0	0	0	0	0	0	0	0	0	0	0	0	0	0	0	0	0	0	0	0	0	0	0	0	0	0	0	0	0	0
ENSG00000126709	IFI6	412	543	438	395	429	341	551	380	467	930	315	443	1	9	291	253	100	1	135	127	45	0	80	44	179	9	13	126	135	1585	108	753	1	0	0	0	0	2
ENSG00000206767	RNU6-949P	0	0	0	1	0	0	0	0	0	0	0	0	0	0	0	0	0	0	0	0	0	0	0	0	0	0	0	0	0	0	0	0	0	0	0	0	0	0
ENSG00000226662	CHMP1AP1	0	0	0	0	0	0	0	0	0	0	0	0	0	0	4	0	0	0	0	0	0	0	0	0	0	0	0	0	0	0	0	0	0	0	0	0	0	0
ENSG00000207095	RNU6-424P	0	0	0	0	0	0	0	0	0	0	0	0	0	0	0	1	0	0	0	0	0	0	0	0	0	0	0	0	0	0	0	0	0	0	0	0	0	0
ENSG00000009780	FAM76A	109	58	39	72	21	61	31	23	19	62	26	25	0	0	0	39	137	0	14	0	0	0	0	1	36	0	4	0	0	174	19	84	0	0	0	0	0	1
ENSG00000231344	AL020997.1	20	5	2	0	3	0	2	0	8	4	3	0	0	0	0	0	0	0	0	0	0	0	0	0	0	0	0	0	0	1	0	2	0	0	0	0	0	0
ENSG00000117758	STX12	54	68	56	57	66	111	22	9	28	25	29	38	1	0	39	59	313	0	0	0	47	0	0	0	32	1	77	7	34	116	49	183	0	0	0	0	0	2
ENSG00000269971	AL020997.2	4	0	0	2	0	0	0	0	0	0	0	0	0	0	0	0	0	0	0	0	0	0	0	0	0	0	0	0	0	0	0	0	0	0	0	0	0	0
ENSG00000270031	AL020997.3	0	0	0	0	0	0	3	0	0	0	0	0	0	0	1	0	0	0	0	0	0	0	0	0	0	0	0	0	0	0	0	0	0	0	0	0	0	0
ENSG00000117751	PPP1R8	77	42	80	42	27	9	36	10	30	15	23	25	0	1	0	0	0	0	122	0	0	0	0	0	0	0	0	0	1	115	0	137	0	0	0	0	0	0
ENSG00000130775	THEMIS2	104	221	233	197	235	128	14	5	20	28	33	22	0	0	2	76	0	0	0	82	0	18	0	0	180	2	279	0	226	24	47	209	2	0	0	0	2	1
ENSG00000117748	RPA2	45	60	77	64	80	69	27	17	31	38	23	60	1	5	0	32	0	0	44	0	1	0	0	1	2	0	106	0	278	252	0	137	1	0	0	0	0	1
ENSG00000130768	SMPDL3B	5	0	2	0	0	39	9	9	19	16	3	4	0	0	0	0	0	0	0	0	0	0	0	0	0	0	0	0	72	0	0	39	0	0	0	0	0	0
ENSG00000158156	XKR8	69	59	32	25	21	38	12	6	18	12	25	23	0	27	0	0	0	0	1	0	0	0	0	12	31	0	28	0	0	31	0	0	0	0	0	0	0	0
ENSG00000158161	EYA3	12	21	33	26	19	24	15	20	23	32	14	16	0	1	0	0	44	1	16	263	0	57	2	0	0	54	54	1	22	68	36	138	0	0	0	0	0	1
ENSG00000240750	RN7SL559P	0	0	9	0	11	0	9	5	1	0	1	2	0	0	0	0	0	0	0	0	0	0	0	0	0	8	0	0	0	0	0	0	0	0	0	0	0	0
ENSG00000228589	SPCS2P4	10	7	10	6	0	0	6	4	4	13	7	8	0	0	0	0	0	0	0	0	0	0	0	0	0	0	62	0	39	41	0	5	0	0	0	0	0	1
ENSG00000214812	AL137792.1	0	0	0	0	0	0	0	0	2	0	0	0	0	0	0	0	0	0	0	0	34	0	0	0	0	0	0	0	0	0	0	0	0	0	0	0	0	0
ENSG00000253005	RNU6-176P	0	0	0	0	0	0	0	0	0	0	0	0	0	0	0	0	0	0	0	0	0	0	0	0	0	0	0	0	0	0	0	10	0	0	0	0	0	0
ENSG00000169403	PTAFR	78	91	43	71	69	9	8	2	19	16	6	8	157	1	0	0	297	0	0	158	1	0	29	0	0	1	57	0	1	158	0	1	0	0	0	0	0	0
ENSG00000126698	DNAJC8	44	48	56	94	68	101	22	7	11	36	29	23	2	25	18	0	121	0	7	0	0	0	0	0	0	1	61	0	41	144	103	61	2	1	0	0	0	1
ENSG00000130770	ATPIF1	106	106	127	191	182	201	110	112	165	176	136	112	122	6	26	86	250	0	1	1	2	0	0	0	27	70	54	82	84	835	0	618	1	0	0	1	0	2
ENSG00000270605	AL353622.1	14	1	0	0	0	0	2	0	0	0	1	0	0	0	0	0	0	0	0	0	0	0	0	0	0	0	0	0	0	1	0	0	0	0	0	0	0	0
ENSG00000130766	SESN2	9	2	2	19	6	0	5	7	0	11	10	0	1	0	0	0	1	0	0	0	0	0	0	0	0	0	36	1	0	14	0	0	0	0	0	0	0	0
ENSG00000130772	MED18	6	2	22	5	6	0	20	7	3	0	7	17	0	1	0	34	75	0	0	0	0	0	0	0	0	0	0	0	0	83	0	0	0	0	0	1	0	0
ENSG00000204138	PHACTR4	73	23	94	134	59	122	26	24	29	83	20	39	119	2	59	88	113	0	47	1	0	0	1	0	7	62	274	0	92	191	0	66	0	0	0	1	0	0
ENSG00000229820	CR391992.1	33	10	0	2	11	0	3	0	0	4	0	0	0	0	0	0	0	0	0	0	0	0	0	0	0	0	0	0	0	11	0	0	0	0	0	0	0	0
ENSG00000180198	RCC1	2	6	7	9	12	1	31	17	40	28	43	33	0	0	0	0	0	0	0	0	0	0	0	0	0	0	0	0	0	143	0	300	0	0	0	0	0	0
ENSG00000242125	SNHG3	2	7	0	4	9	0	3	2	7	5	10	1	0	0	0	0	0	0	0	0	0	0	0	0	51	0	79	18	0	71	0	152	0	0	0	0	0	1
ENSG00000231468	PRDX3P2	0	0	7	0	0	0	0	0	1	0	0	0	0	0	0	0	0	0	0	0	0	0	0	0	0	0	0	0	0	0	0	0	0	0	0	0	0	0
ENSG00000279443	AL513497.1	0	0	0	2	0	0	7	0	0	4	7	16	0	1	0	0	0	0	0	0	0	0	0	0	0	0	0	0	0	128	0	0	0	0	0	0	0	0
ENSG00000180098	TRNAU1AP	5	16	30	13	7	22	24	21	32	20	18	9	0	0	38	0	0	0	2	0	24	0	72	0	0	0	0	14	125	152	1	35	0	0	0	0	0	0
ENSG00000197989	SNHG12	209	147	158	179	124	181	32	10	26	45	29	70	2	66	0	2	63	21	0	0	38	1	1	1	42	4	26	1	5	351	156	325	1	0	0	0	0	1
ENSG00000120656	TAF12	98	53	19	84	79	58	41	25	18	33	13	15	1	0	114	124	12	0	1	37	0	0	3	0	116	1	91	0	103	93	0	119	0	0	0	0	0	0
ENSG00000188060	RAB42	25	74	30	71	82	50	2	3	1	0	0	5	0	0	0	0	80	0	0	0	0	0	0	0	0	0	0	0	0	0	0	130	0	0	0	1	0	1
ENSG00000229388	LINC01715	0	0	0	0	0	0	1	0	0	0	0	0	0	0	0	0	0	0	0	0	0	0	0	0	0	0	0	0	0	0	0	0	0	0	0	0	0	0
ENSG00000162419	GMEB1	10	6	13	7	45	42	10	9	14	12	12	18	0	2	0	89	2	0	0	0	55	0	0	0	18	0	11	0	30	152	1	24	0	0	0	0	0	1
ENSG00000198492	YTHDF2	92	113	84	127	227	200	138	170	152	235	185	206	29	81	26	173	336	43	0	0	112	5	1	1	401	2	107	8	88	903	182	458	0	0	0	0	0	2
ENSG00000116329	OPRD1	2	0	3	7	11	0	0	3	0	0	1	0	0	0	0	0	2	0	0	0	0	0	0	0	0	0	1	0	0	1	0	0	0	0	0	0	0	0
ENSG00000159023	EPB41	11	13	10	2	26	20	12	3	1	14	3	11	42	2	0	0	0	0	0	0	0	0	0	0	15	0	58	0	9	13	0	2	0	0	0	0	0	0
ENSG00000225616	AL138785.1	144	163	177	128	107	141	46	36	31	70	36	56	29	11	86	102	2	31	9	0	92	0	14	1	32	8	171	7	49	357	39	212	0	0	1	0	0	3
ENSG00000277958	Metazoa_SRP	0	0	0	0	0	1	0	0	1	2	1	0	0	0	0	0	1	0	0	0	0	0	0	0	0	0	0	0	0	2	0	0	0	0	0	0	0	0
ENSG00000253304	TMEM200B	0	12	0	0	5	0	0	0	0	1	0	0	0	0	0	0	29	0	0	0	0	0	0	0	0	0	0	0	4	42	0	0	0	0	0	0	0	0
ENSG00000116350	SRSF4	162	103	87	78	64	140	53	28	70	71	71	54	236	0	65	8	313	0	184	3	0	0	38	0	116	0	157	1	71	423	210	86	0	0	0	2	0	1
ENSG00000116353	MECR	28	5	5	2	23	9	7	12	19	27	28	25	1	0	0	0	6	0	0	0	0	0	0	0	18	0	25	0	0	96	67	191	0	0	1	1	0	1
ENSG00000060656	PTPRU	37	7	15	21	19	3	168	150	119	124	191	157	0	1	67	1	0	0	0	0	0	0	43	7	84	64	1	44	42	695	0	404	0	1	0	0	0	0
ENSG00000186056	MATN1-AS1	0	4	0	10	0	0	2	0	2	5	3	0	0	0	0	0	0	0	0	0	0	0	0	0	0	0	0	0	0	56	0	0	0	0	0	0	0	0
ENSG00000162511	LAPTM5	1279	1836	1613	1422	1510	1357	35	54	13	167	19	68	190	70	132	260	351	165	52	180	151	27	3	33	302	32	1512	1	374	551	441	72	3	0	37	0	2	8
ENSG00000223382	LINC01778	0	0	0	0	0	0	0	0	0	0	0	0	0	0	0	0	0	0	0	0	0	0	0	0	0	0	0	0	0	1	0	0	0	0	0	0	0	0
ENSG00000162512	SDC3	146	119	113	96	88	33	45	61	51	63	48	60	1	27	177	83	0	261	49	54	39	2	0	4	35	1	170	0	54	156	0	228	0	0	0	0	0	0
ENSG00000134644	PUM1	190	205	187	210	265	233	208	202	235	258	154	218	178	4	56	28	246	0	123	145	174	194	4	0	197	76	220	1	161	912	134	641	0	0	0	0	165	2
ENSG00000232768	AL356320.1	0	0	0	0	0	0	0	0	0	0	0	1	0	0	0	0	0	0	0	0	0	0	0	0	0	0	0	0	0	0	0	0	0	0	0	0	0	0
ENSG00000225142	AC114495.1	1	0	0	0	0	0	0	0	0	0	0	0	0	0	0	0	0	0	0	0	0	0	0	0	0	0	0	0	0	0	0	0	0	0	0	0	0	0
ENSG00000084628	NKAIN1	0	0	0	0	0	0	0	0	1	0	0	0	0	0	0	0	0	0	0	0	0	0	0	0	0	0	0	0	0	0	0	0	0	0	0	0	0	0
ENSG00000060688	SNRNP40	56	48	23	13	19	3	34	24	47	47	35	47	1	137	1	92	0	0	0	0	0	0	0	0	15	1	33	0	0	28	0	90	0	0	0	0	0	0
ENSG00000229447	AC114495.2	0	0	1	14	42	0	0	11	0	0	0	5	0	0	0	0	0	0	0	0	0	0	0	0	0	0	0	0	0	0	0	0	0	0	0	0	0	0
ENSG00000121766	ZCCHC17	49	22	12	20	17	0	13	4	19	18	16	20	0	1	0	0	1	0	4	0	0	0	34	0	2	0	0	99	0	199	0	27	0	0	0	0	0	1
ENSG00000121769	FABP3	29	21	52	29	12	158	10	7	14	2	1	10	0	0	0	0	0	0	0	0	1	0	0	0	0	1	0	0	0	1	0	0	0	0	0	0	0	0
ENSG00000168528	SERINC2	15	14	32	25	10	0	161	147	131	172	109	249	0	2	0	0	0	0	0	0	0	0	0	0	0	28	1	72	0	482	0	402	0	0	0	1	0	1
ENSG00000260386	LINC01225	0	0	0	0	0	0	0	0	0	0	2	0	0	0	0	0	0	0	0	0	0	0	0	0	0	0	0	0	0	0	0	0	0	0	0	0	0	0
ENSG00000284543	LINC01226	11	0	0	0	0	0	2	0	0	4	0	0	0	0	0	0	0	0	0	0	0	0	0	0	2	0	0	0	0	2	0	0	0	0	0	0	0	0
ENSG00000142910	TINAGL1	1	17	26	18	32	38	34	58	51	58	38	9	2	37	0	74	9	1	373	0	1	0	0	0	32	1	1	0	72	319	0	383	0	0	0	0	0	0
ENSG00000162517	PEF1	29	55	36	34	74	59	26	29	39	79	25	74	1	2	29	15	3	0	0	0	0	0	0	0	36	1	161	0	34	365	103	329	0	0	0	0	0	1
ENSG00000084636	COL16A1	69	131	59	97	191	78	14	0	11	14	14	39	123	1	28	20	307	1	28	0	55	96	1	0	1	0	51	0	7	130	51	65	0	0	0	0	0	0
ENSG00000121753	ADGRB2	51	27	23	22	32	15	63	36	64	21	37	38	0	0	0	25	1	1	24	0	0	39	1	0	0	31	26	0	1	222	14	122	0	0	0	0	0	0
ENSG00000134668	SPOCD1	22	68	27	42	99	46	0	2	0	6	1	8	1	0	0	0	0	0	0	0	0	0	0	0	0	0	2	0	11	12	0	1	0	0	0	0	0	0
ENSG00000203620	AL354919.1	0	2	0	1	0	0	0	0	0	0	0	0	0	0	0	0	0	0	0	0	0	0	0	0	0	0	0	0	0	0	0	0	0	0	0	0	0	0
ENSG00000269967	AL136115.2	0	0	0	0	0	0	0	0	1	0	0	0	0	0	0	0	0	0	0	0	0	0	0	0	0	0	0	0	0	0	0	0	0	0	0	0	0	0
ENSG00000184007	PTP4A2	713	577	643	612	760	572	526	570	664	897	577	645	213	75	245	403	302	201	209	536	1	3	98	81	255	78	597	64	882	3314	134	2445	20	3	3	2	3	10
ENSG00000121774	KHDRBS1	218	213	222	318	208	142	204	207	202	259	183	227	54	1	127	169	259	0	256	109	92	5	107	2	20	5	179	24	331	1599	184	426	0	2	0	2	0	1
ENSG00000203325	AL445248.1	0	0	0	0	0	0	1	0	0	0	0	0	0	0	0	0	0	0	0	0	0	0	0	0	0	0	0	0	0	0	0	0	0	0	0	0	0	0
ENSG00000121775	TMEM39B	29	21	10	51	88	6	15	5	19	19	19	19	1	0	44	0	0	0	26	0	0	0	0	0	0	0	57	0	0	122	0	106	0	0	0	0	0	0
ENSG00000276493	Metazoa_SRP	1	2	0	0	0	1	0	0	0	0	0	0	0	0	0	0	0	0	0	0	0	0	0	0	0	0	0	0	0	0	0	0	0	0	0	0	0	0
ENSG00000025800	KPNA6	48	60	59	61	93	25	107	104	111	130	101	129	3	1	73	16	0	0	29	0	0	1	0	0	134	1	40	25	39	788	79	514	0	1	0	0	0	0
ENSG00000084652	TXLNA	91	145	104	109	58	152	93	65	98	118	121	112	0	2	0	151	30	37	40	0	147	80	3	0	2	1	95	0	70	490	66	321	1	0	67	0	0	2
ENSG00000160050	CCDC28B	9	0	0	2	0	0	1	1	1	2	0	0	0	0	0	0	0	0	0	0	0	0	0	0	0	0	0	0	0	35	0	1	0	0	0	0	0	0
ENSG00000224066	AL049795.1	0	0	0	0	0	43	3	0	0	6	0	0	0	0	0	0	0	0	0	0	0	0	0	0	0	0	0	0	0	0	0	0	0	0	0	0	0	0
ENSG00000160051	IQCC	0	2	4	0	0	1	4	0	1	6	2	2	0	0	0	0	0	0	0	0	0	0	0	0	0	0	0	0	0	1	1	0	0	0	0	0	0	0
ENSG00000160055	TMEM234	5	13	9	23	40	0	31	16	16	21	16	25	0	1	0	0	0	0	0	0	0	0	0	0	73	1	30	0	56	160	53	0	0	0	0	0	0	0
ENSG00000084623	EIF3I	93	59	65	43	79	87	105	92	119	144	93	98	1	70	138	53	0	0	0	87	0	26	1	0	252	23	28	2	113	660	63	517	0	0	0	0	0	0
ENSG00000220785	MTMR9LP	0	6	12	0	6	68	1	0	2	3	6	3	0	0	42	0	0	0	0	0	0	0	0	0	0	1	0	0	0	0	6	1	0	0	0	0	0	0
ENSG00000183615	FAM167B	0	0	25	13	0	0	3	0	3	4	3	12	0	26	0	0	0	0	0	0	0	0	0	0	0	0	0	0	0	47	0	51	0	0	0	0	0	0
ENSG00000182866	LCK	0	39	20	17	54	0	0	6	0	1	1	0	0	0	0	0	0	0	145	0	0	1	0	0	0	0	0	0	0	0	57	0	0	0	0	0	0	0
ENSG00000116478	HDAC1	45	32	63	65	9	67	52	12	36	42	54	75	3	34	13	1	0	0	114	0	0	0	0	0	0	2	84	0	215	350	0	260	0	0	0	0	1	0
ENSG00000175130	MARCKSL1	41	83	60	162	119	54	805	757	889	1036	753	997	11	9	92	2	72	33	4	4	0	1	21	40	246	288	93	2	379	3847	80	3089	1	4	0	2	1	3
ENSG00000225828	FAM229A	6	3	2	9	17	37	4	1	8	14	1	0	0	0	0	0	49	0	0	10	0	0	0	0	0	0	1	0	1	1	0	0	0	1	0	0	0	0
ENSG00000160058	BSDC1	87	130	79	55	58	35	103	92	82	109	50	123	63	2	16	24	15	1	0	0	63	2	0	36	20	2	127	0	99	432	56	487	0	0	0	0	0	2
ENSG00000273274	ZBTB8B	0	0	0	0	0	0	1	0	0	0	5	1	0	0	0	0	0	0	0	0	0	0	0	0	0	0	0	0	0	4	0	0	0	0	0	0	0	0
ENSG00000160062	ZBTB8A	20	9	25	15	16	3	18	1	23	16	7	6	0	0	89	0	0	0	0	0	0	0	0	0	0	8	0	0	85	166	0	23	0	0	0	0	0	0
ENSG00000176261	ZBTB8OS	108	69	58	90	41	80	59	35	26	56	34	28	0	1	143	0	0	57	89	0	56	0	0	0	0	1	76	0	43	140	1	27	1	0	0	1	0	2
ENSG00000162521	RBBP4	219	118	114	130	92	98	202	170	150	230	180	179	19	7	0	24	1	49	50	149	21	64	72	1	33	19	128	0	144	1357	53	951	1	1	0	1	0	1
ENSG00000162520	SYNC	6	14	8	0	0	13	6	0	0	3	2	0	0	0	0	0	0	0	0	0	0	0	0	0	0	0	0	0	0	0	0	0	0	0	0	0	0	0
ENSG00000162522	KIAA1522	10	32	18	31	9	28	264	206	303	337	316	323	1	10	45	1	68	0	1	3	95	1	0	19	106	146	2	0	257	1376	1	978	0	0	0	1	1	2
ENSG00000134684	YARS	132	85	49	122	20	95	89	74	86	125	90	107	3	1	1	53	19	0	35	1	102	0	0	0	0	171	176	1	5	638	12	411	1	0	0	0	1	2
ENSG00000116497	S100PBP	28	35	48	31	47	48	24	46	30	37	19	50	0	1	0	0	0	0	14	0	0	0	0	31	0	1	14	0	0	130	0	191	0	0	0	0	0	0
ENSG00000160097	FNDC5	1	4	23	0	0	0	0	0	0	0	1	0	0	0	0	0	0	0	0	29	0	0	0	0	0	0	0	0	0	0	0	0	0	0	0	0	0	0
ENSG00000121905	HPCA	0	1	0	0	0	0	2	0	0	0	0	0	0	0	0	0	0	0	0	0	0	0	0	0	0	0	0	0	0	0	0	0	0	0	0	0	0	0
ENSG00000121900	TMEM54	11	25	7	5	5	0	54	40	86	83	69	72	0	1	0	0	0	0	0	0	194	53	0	0	31	0	0	2	0	292	0	46	0	1	0	0	0	0
ENSG00000116514	RNF19B	21	7	26	0	0	34	3	5	10	0	1	8	0	0	0	0	0	0	0	0	0	0	0	0	0	0	0	0	0	0	0	0	0	0	0	0	0	0
ENSG00000217644	AL355864.1	0	0	0	0	0	0	0	0	0	0	0	1	0	0	0	0	0	0	0	0	0	0	0	0	0	0	0	0	0	0	0	0	0	0	0	0	0	0
ENSG00000004455	AK2	64	89	41	71	58	45	77	75	86	109	64	81	19	1	128	61	2	0	0	1	0	72	1	0	71	6	2	0	117	396	0	161	0	0	0	0	0	1
ENSG00000276645	Metazoa_SRP	0	0	0	0	0	0	1	3	2	3	0	3	0	0	0	0	0	0	0	0	0	0	0	0	0	0	0	0	0	0	0	0	0	0	0	0	0	0
ENSG00000142920	AZIN2	21	20	12	16	0	7	2	6	4	13	4	0	1	1	0	0	0	0	0	0	0	0	0	0	0	0	0	11	0	142	1	130	0	0	0	0	0	0
ENSG00000278997	AL662907.1	17	4	0	0	5	0	0	0	1	0	2	2	0	0	0	0	0	0	0	0	0	0	0	0	0	0	0	0	0	0	0	0	0	0	0	0	0	0
ENSG00000116525	TRIM62	15	14	7	4	0	1	32	32	31	37	27	15	0	0	0	0	0	0	0	0	0	0	0	0	18	42	0	0	0	47	0	5	0	0	0	0	0	0
ENSG00000279179	AL662907.2	0	0	0	0	0	3	0	0	0	0	0	0	0	0	0	0	0	0	0	0	0	0	0	0	0	0	0	0	0	0	0	0	0	0	0	0	0	0
ENSG00000160094	ZNF362	23	46	64	31	89	32	56	60	51	47	53	62	4	1	74	0	91	0	43	0	66	0	0	0	3	1	1	0	90	367	0	73	0	0	0	0	0	0
ENSG00000225313	AL513327.1	0	0	8	0	0	0	0	0	0	0	0	0	0	0	0	0	0	0	0	0	0	0	0	0	0	0	0	0	0	0	0	0	0	0	0	0	0	0
ENSG00000134686	PHC2	83	86	38	88	112	7	68	25	78	54	100	52	1	4	0	0	207	0	51	0	18	0	66	33	11	17	195	61	1	366	23	129	0	0	0	0	2	1
ENSG00000222112	RN7SKP16	0	8	0	0	0	0	0	0	0	0	0	0	0	0	0	0	0	0	0	0	0	0	0	0	0	0	0	0	0	0	0	1	0	0	0	0	0	0
ENSG00000121903	ZSCAN20	0	0	0	4	0	0	0	0	0	0	1	0	0	0	0	0	0	0	0	0	0	0	0	0	0	0	0	0	0	0	0	0	0	0	0	0	0	0
ENSG00000235907	AC115285.1	124	41	68	70	118	24	50	24	27	17	20	50	0	2	4	0	0	0	0	0	0	0	0	0	16	1	5	1	0	82	138	4	0	0	0	0	0	1
ENSG00000121904	CSMD2	0	5	23	15	41	17	0	0	0	0	0	2	0	0	0	0	0	0	0	12	0	0	0	0	0	0	0	0	0	0	0	72	0	0	0	0	0	0
ENSG00000227000	HSPD1P14	0	0	0	0	0	0	0	0	0	0	1	0	0	0	0	0	0	0	0	0	0	0	0	0	0	0	0	0	0	0	0	0	0	0	0	0	0	0
ENSG00000142698	C1orf94	0	0	0	0	0	0	1	0	0	0	0	0	0	0	0	0	0	0	0	0	0	0	0	0	0	0	0	0	0	0	0	0	0	0	0	0	0	0
ENSG00000163866	SMIM12	53	11	10	43	18	42	2	4	9	18	19	15	0	0	0	0	0	0	0	0	0	0	0	0	0	0	23	0	1	95	84	12	0	0	0	0	1	0
ENSG00000189280	GJB5	0	0	0	0	0	0	2	2	12	17	6	2	0	0	0	0	0	0	0	0	0	0	0	0	0	0	0	0	0	0	0	0	0	0	0	0	0	0
ENSG00000188910	GJB3	0	0	0	0	0	0	4	2	2	0	10	0	0	0	0	0	6	0	0	0	0	0	0	0	0	0	0	0	1	0	0	26	0	0	0	0	0	0
ENSG00000187513	GJA4	9	7	51	24	18	0	3	0	5	0	0	8	0	0	86	0	0	0	0	0	0	0	0	0	0	0	0	0	0	0	0	0	0	0	0	0	0	0
ENSG00000116544	DLGAP3	0	0	0	0	0	0	0	0	0	0	1	0	0	0	0	0	0	0	0	0	0	0	0	0	0	0	0	0	0	0	0	0	0	0	0	0	0	0
ENSG00000241014	AC114490.1	108	13	28	8	39	38	0	0	0	1	4	1	0	0	0	0	0	0	0	0	0	0	15	0	24	0	0	0	0	0	0	0	0	0	0	0	0	0
ENSG00000163867	ZMYM6	48	36	52	94	24	22	10	20	23	40	28	29	0	2	29	0	232	0	1	0	0	0	0	0	13	0	111	0	0	79	0	84	0	0	0	0	0	1
ENSG00000197056	ZMYM1	9	5	3	5	0	14	5	3	3	0	3	8	0	0	0	0	0	0	0	0	0	0	0	0	0	0	40	0	0	11	0	38	0	0	0	0	0	0
ENSG00000116560	SFPQ	183	336	373	340	352	394	265	176	231	374	325	440	286	153	327	126	155	61	153	8	140	111	2	0	178	288	410	160	75	1910	176	617	0	2	2	1	2	5
ENSG00000201868	Y_RNA	0	0	0	3	0	0	0	0	0	0	0	0	0	0	0	0	0	0	0	0	0	0	0	0	0	0	0	0	0	0	0	0	0	0	0	0	0	0
ENSG00000146463	ZMYM4	94	59	99	53	149	99	35	51	39	75	63	69	0	131	0	38	6	0	1	11	0	1	0	0	78	3	62	0	100	339	70	92	0	0	0	2	0	1
ENSG00000201542	SNORA62	0	2	0	3	0	0	10	0	4	0	0	0	81	0	0	0	0	0	0	0	0	0	0	0	0	1	0	0	31	56	0	0	1	0	0	0	0	0
ENSG00000229994	RPL5P4	1	6	8	20	5	14	9	1	11	4	2	3	0	0	0	0	0	0	0	0	0	0	0	0	2	0	0	0	43	0	0	9	0	0	0	0	0	0
ENSG00000278702	Metazoa_SRP	0	0	0	0	0	0	0	0	0	0	0	0	0	0	0	0	6	0	0	0	0	0	0	0	0	0	0	0	0	1	0	0	0	0	0	0	0	0
ENSG00000142687	KIAA0319L	22	62	91	105	36	89	102	122	109	187	94	124	111	5	168	58	0	13	11	46	1	0	0	0	88	158	64	0	144	684	0	332	0	0	0	0	0	1
ENSG00000236274	AC004865.1	0	1	0	0	0	0	0	0	0	0	0	0	0	0	0	0	0	0	0	0	0	0	0	0	0	0	0	0	0	0	0	0	0	0	0	0	0	0
ENSG00000020129	NCDN	21	1	33	9	40	11	46	41	38	61	24	55	0	1	0	0	0	0	0	0	0	0	0	0	123	1	0	0	48	123	0	167	0	0	0	0	0	0
ENSG00000239636	AC004865.2	0	10	6	10	11	8	0	0	0	6	0	1	0	1	1	0	71	0	0	0	0	61	0	0	0	0	0	0	0	18	0	0	0	0	0	0	0	0
ENSG00000126067	PSMB2	159	164	139	183	178	154	158	121	162	281	172	175	80	38	144	17	34	82	62	84	181	0	1	1	107	26	298	0	122	827	0	306	0	1	0	0	0	4
ENSG00000142686	C1orf216	29	7	1	40	39	23	17	0	15	2	2	5	0	0	0	1	0	0	18	0	0	0	0	40	40	0	7	0	0	166	0	59	0	1	1	0	0	2
ENSG00000092853	CLSPN	8	6	0	0	0	0	2	0	7	8	16	9	0	0	0	0	0	0	0	0	0	0	0	0	13	0	0	0	0	97	1	2	0	0	0	0	0	0
ENSG00000134698	AGO4	68	31	36	49	7	56	29	24	24	39	27	36	1	0	27	2	32	0	68	12	0	0	0	0	68	18	21	0	0	20	0	157	0	0	0	0	1	1
ENSG00000092847	AGO1	28	95	33	46	47	109	48	46	28	45	33	64	1	33	66	0	13	2	0	65	62	1	12	0	4	0	39	0	0	141	0	45	0	0	0	0	0	0
ENSG00000271914	AL139286.2	0	0	0	0	0	0	0	0	0	5	0	0	0	0	0	0	0	0	0	0	0	0	0	0	0	0	0	0	0	0	0	0	0	0	0	0	0	0
ENSG00000126070	AGO3	33	43	92	31	36	104	47	5	37	48	43	25	8	0	0	34	0	102	126	0	1	0	17	0	189	56	24	126	90	69	198	158	0	1	5	0	0	1
ENSG00000271554	AL138787.2	0	0	0	0	0	0	4	0	0	6	0	0	0	0	0	0	0	0	0	0	0	0	0	0	0	0	0	0	0	0	0	0	0	0	0	0	0	0
ENSG00000092850	TEKT2	0	0	0	0	0	0	6	0	0	2	1	3	0	0	0	0	0	0	0	0	0	0	0	0	0	1	0	0	4	0	0	0	0	0	0	0	0	0
ENSG00000116863	ADPRHL2	2	38	15	32	0	0	19	8	6	35	12	32	147	3	0	0	0	0	0	0	0	210	0	0	111	2	167	0	50	209	0	0	1	0	0	0	0	1
ENSG00000171812	COL8A2	166	134	106	107	99	87	16	34	6	61	6	15	0	1	97	175	184	240	0	210	169	0	4	17	0	0	1	0	25	123	0	1	0	0	0	1	0	0
ENSG00000054116	TRAPPC3	15	53	23	32	139	5	12	44	30	33	35	39	0	2	6	0	2	0	11	0	2	0	0	0	23	2	33	0	295	117	0	0	0	0	0	0	0	1
ENSG00000116871	MAP7D1	295	296	310	266	299	160	122	80	121	130	92	138	33	68	243	34	224	80	38	55	0	1	0	0	45	24	346	198	318	567	237	297	0	0	1	0	0	1
ENSG00000264592	RN7SL131P	1	0	1	0	2	1	0	0	1	1	4	1	0	0	1	0	0	0	0	0	0	0	0	0	0	0	0	0	0	24	0	0	0	0	0	0	0	0
ENSG00000054118	THRAP3	128	179	161	165	233	230	80	86	120	198	159	138	67	17	40	44	51	65	24	1	25	123	56	1	65	1	114	84	162	797	47	302	0	0	0	0	0	1
ENSG00000214193	SH3D21	18	25	10	14	14	15	24	26	28	9	37	15	0	0	0	0	0	0	0	0	0	0	0	0	2	11	0	0	0	16	0	2	0	0	0	0	0	0
ENSG00000142694	EVA1B	145	222	114	186	129	89	67	41	49	109	27	94	0	2	182	0	61	51	0	0	0	55	0	28	43	77	26	0	82	287	42	290	1	1	0	0	2	1
ENSG00000116883	AL591845.1	0	0	4	16	0	0	6	0	1	9	2	8	0	0	0	0	0	0	0	0	0	0	0	0	0	0	0	0	0	26	0	0	0	0	0	0	0	0
ENSG00000196182	STK40	179	183	175	215	163	117	116	115	145	118	132	127	8	0	86	210	204	89	37	37	0	3	2	17	52	0	317	27	5	714	0	181	0	0	0	2	0	3
ENSG00000181817	LSM10	60	79	16	30	15	47	7	19	21	37	22	34	0	1	17	140	0	0	61	0	0	0	2	0	0	0	53	0	0	113	0	253	0	0	0	0	1	1
ENSG00000116885	OSCP1	8	28	2	5	16	0	10	16	11	8	12	27	1	1	0	0	0	10	0	0	0	41	0	0	0	0	0	0	0	48	0	55	0	0	0	0	0	0
ENSG00000201448	SNORA63C	0	0	0	0	0	0	1	0	0	1	0	0	0	0	0	0	0	0	0	0	0	0	0	0	0	0	0	0	0	0	0	0	0	0	0	0	0	0
ENSG00000116898	MRPS15	0	23	7	44	0	47	19	32	18	34	11	16	1	0	2	0	24	0	0	0	0	0	0	0	56	0	19	0	0	112	1	52	0	0	0	0	0	0
ENSG00000119535	CSF3R	17	10	22	51	14	12	1	1	4	14	18	0	0	0	0	2	0	0	29	0	0	0	0	0	0	0	12	0	2	0	0	34	0	0	0	0	0	0
ENSG00000163873	GRIK3	0	0	0	0	0	0	0	0	1	0	0	0	0	0	0	0	0	0	0	0	0	0	0	0	0	0	0	0	0	71	0	0	0	1	0	0	0	0
ENSG00000230451	RPS29P6	0	0	0	0	0	0	0	0	0	0	0	0	0	0	0	0	0	0	0	0	0	0	0	0	0	0	0	0	1	0	0	0	0	0	0	0	0	0
ENSG00000233621	LINC01137	19	0	0	0	0	0	0	0	1	4	0	0	0	0	0	0	0	0	0	0	0	0	0	0	0	0	0	0	0	0	0	0	0	0	0	0	0	0
ENSG00000163874	ZC3H12A	5	22	10	1	12	0	22	9	27	60	26	11	0	1	0	0	0	0	0	0	0	0	0	0	0	0	0	9	16	93	0	134	0	0	0	0	0	0
ENSG00000163875	MEAF6	109	131	174	116	174	112	111	96	119	150	117	79	2	3	0	41	0	0	0	0	0	1	0	0	72	83	60	1	87	1111	95	521	0	3	1	0	0	3
ENSG00000163877	SNIP1	58	15	2	23	24	12	18	5	17	20	36	18	0	0	0	0	17	0	0	0	0	0	0	0	0	19	49	0	0	12	0	114	0	0	0	0	0	0
ENSG00000232273	FTH1P1	2351	2453	2436	2131	1920	2101	166	153	137	186	93	271	277	2	296	208	250	1	140	1	426	2	1	0	333	3	1610	28	386	417	313	271	0	1	2	0	1	16
ENSG00000237749	AL034379.1	359	395	343	405	340	305	114	137	156	188	104	142	136	74	97	127	48	24	67	61	78	3	4	37	496	35	241	6	70	820	154	569	1	2	0	0	85	2
ENSG00000163879	DNALI1	0	0	0	0	0	0	19	3	7	7	4	14	0	1	0	0	0	0	0	0	0	0	0	0	0	0	0	0	0	55	0	0	0	0	0	0	0	0
ENSG00000134697	GNL2	10	32	27	41	95	61	47	49	45	65	35	50	0	0	0	0	55	0	48	0	0	0	1	27	0	1	74	0	12	183	110	17	0	0	0	0	0	1
ENSG00000169218	RSPO1	0	0	0	0	0	0	3	0	0	0	0	0	0	0	0	40	0	0	0	0	0	0	1	0	0	0	0	0	0	0	0	0	0	0	0	0	0	0
ENSG00000116922	C1orf109	0	9	9	21	1	19	10	12	18	33	15	17	0	0	0	0	0	0	14	0	0	0	0	0	0	0	0	0	25	76	63	7	0	0	0	0	0	0
ENSG00000134690	CDCA8	0	6	14	19	32	7	16	19	13	22	11	5	0	0	0	27	0	0	0	0	0	0	0	0	0	0	0	0	0	27	0	1	0	0	71	0	0	0
ENSG00000183317	EPHA10	0	0	0	0	0	0	0	0	0	3	1	2	0	0	0	0	0	0	0	0	0	0	0	0	0	0	0	0	0	0	0	1	0	0	0	0	0	0
ENSG00000200421	Y_RNA	0	0	0	0	0	0	1	0	0	0	0	0	0	0	0	0	0	0	0	0	0	0	0	0	0	0	0	0	0	0	0	0	0	0	0	0	0	0
ENSG00000185090	MANEAL	0	0	1	7	0	0	3	2	8	12	9	9	0	1	0	0	0	0	0	0	0	0	0	0	0	49	0	0	0	64	1	0	0	1	0	0	0	0
ENSG00000196449	YRDC	5	17	10	0	16	0	18	16	15	24	13	13	0	0	0	0	0	0	0	60	0	0	1	0	0	0	0	0	0	14	0	230	0	0	0	0	0	0
ENSG00000197982	C1orf122	58	54	71	37	45	14	45	48	90	113	42	99	33	4	112	232	182	0	18	28	65	0	4	0	0	0	14	0	0	279	0	95	0	0	0	0	0	1
ENSG00000188786	MTF1	72	15	50	37	20	0	17	47	27	37	36	49	0	1	0	0	3	0	64	0	0	0	0	1	0	1	24	0	0	166	0	217	0	1	0	0	0	0
ENSG00000204084	INPP5B	53	32	25	46	39	90	25	0	8	27	21	11	1	1	33	157	98	0	0	0	1	0	94	0	47	0	4	0	6	201	69	137	0	0	0	0	0	0
ENSG00000183431	SF3A3	41	40	100	88	52	30	82	54	57	98	53	56	139	0	20	63	49	0	0	75	0	0	0	0	0	2	128	0	38	201	0	345	0	0	0	0	0	0
ENSG00000183386	FHL3	0	7	1	17	0	2	1	8	6	4	6	5	0	0	0	0	0	0	25	0	0	0	0	0	0	0	0	0	0	43	0	0	0	0	0	0	0	1
ENSG00000183520	UTP11	6	76	29	46	15	50	18	17	32	44	31	30	0	0	73	0	0	0	0	1	0	0	27	0	127	0	2	0	112	231	0	70	0	0	0	1	0	0
ENSG00000185668	POU3F1	0	0	0	0	0	0	0	0	2	0	0	0	0	0	0	1	0	0	0	0	0	0	0	0	0	0	0	0	0	0	0	0	0	0	0	0	0	0
ENSG00000284623	AL139158.3	0	0	0	0	0	0	0	0	0	0	0	0	0	0	0	0	0	0	0	0	0	0	0	0	0	0	0	0	0	1	0	0	0	0	0	0	0	0
ENSG00000215895	AL354702.1	32	10	32	31	58	93	15	10	33	43	46	28	0	1	3	95	15	0	0	0	0	0	1	1	71	0	53	0	34	63	56	174	0	1	0	0	0	0
ENSG00000116954	RRAGC	38	26	29	82	53	40	16	20	7	26	21	25	0	0	0	0	0	0	0	0	0	0	0	0	0	0	63	26	0	62	0	51	0	1	0	0	0	0
ENSG00000228436	AL139260.1	0	0	0	14	0	0	8	2	0	0	0	0	0	0	0	0	0	0	0	0	0	0	0	0	0	0	0	0	0	0	0	0	0	0	0	0	0	0
ENSG00000214114	MYCBP	9	13	11	32	62	19	36	20	66	84	52	88	1	1	0	48	0	0	0	0	0	0	0	11	41	124	161	0	4	308	0	48	0	0	0	0	0	2
ENSG00000158315	RHBDL2	0	0	0	2	0	0	3	3	13	20	2	26	0	0	0	63	0	0	0	0	0	0	0	0	0	0	0	0	0	91	0	69	0	0	0	0	0	0
ENSG00000199963	RNU6-605P	0	0	0	0	3	0	0	0	0	3	0	0	0	0	0	0	0	0	0	0	0	0	0	0	0	0	0	0	0	0	0	0	0	0	0	0	0	0
ENSG00000235549	EIF1P2	2	0	0	2	0	4	0	1	0	0	0	0	0	0	0	2	0	0	0	0	0	0	0	1	0	0	1	0	0	3	0	2	0	0	0	0	0	0
ENSG00000174574	AKIRIN1	70	51	60	117	68	36	78	25	87	62	77	27	6	53	1	22	126	1	26	48	114	2	1	0	70	4	48	21	150	369	111	294	0	0	0	0	0	1
ENSG00000168653	NDUFS5	115	69	95	185	120	141	114	75	87	156	85	78	1	3	140	1	0	62	83	114	2	0	7	1	25	80	241	69	345	618	66	174	0	0	0	0	1	0
ENSG00000127603	MACF1	184	292	200	357	187	243	151	125	183	228	161	189	41	3	41	142	373	0	154	23	1	21	1	21	198	8	492	64	55	715	108	1124	3	0	0	1	1	5
ENSG00000270040	AL356055.1	0	1	0	0	17	0	0	0	1	0	0	0	0	0	0	0	0	0	0	0	0	0	0	0	0	0	0	0	0	0	0	0	0	0	0	0	0	0
ENSG00000217897	HSPE1P8	0	0	0	0	0	0	0	0	0	0	0	0	0	0	0	0	0	0	0	0	0	0	0	0	0	0	0	0	0	0	0	1	0	0	0	0	0	0
ENSG00000237624	OXCT2P1	0	0	0	1	0	0	0	0	0	0	1	0	0	0	0	0	0	0	0	0	0	0	0	0	0	0	0	0	0	0	0	0	0	0	0	0	0	0
ENSG00000182109	AL365277.1	41	27	25	12	29	24	19	7	24	37	12	30	0	0	0	39	0	0	18	55	1	0	2	0	0	1	0	0	42	71	7	30	0	1	0	0	0	0
ENSG00000090621	PABPC4	264	297	257	318	218	244	212	146	224	296	248	247	65	37	37	228	148	0	117	108	39	95	13	44	140	5	140	0	295	1317	156	470	0	2	0	0	4	10
ENSG00000163909	HEYL	8	11	4	9	0	0	10	0	2	1	2	1	0	0	0	0	0	0	0	0	0	0	0	0	0	0	0	0	0	0	0	0	0	0	0	0	0	0
ENSG00000116983	HPCAL4	0	0	0	0	0	0	0	0	0	0	2	0	0	0	0	0	0	0	0	0	0	0	0	0	0	0	0	0	0	0	0	0	0	0	0	0	0	0
ENSG00000084072	PPIE	33	34	21	31	23	20	26	72	31	66	26	57	59	14	25	2	0	0	0	0	1	0	0	0	0	0	13	20	0	156	39	289	0	0	0	0	0	0
ENSG00000225333	AL035404.1	0	4	6	24	0	0	5	17	0	3	5	10	1	0	0	0	0	0	32	0	0	0	0	0	0	0	0	0	0	3	0	0	1	0	0	0	0	0
ENSG00000116985	BMP8B	0	0	0	8	0	0	0	0	2	5	5	15	0	0	0	0	0	0	0	0	0	0	0	0	0	0	0	0	0	0	0	0	0	0	0	0	0	0
ENSG00000198754	OXCT2	0	1	0	0	0	0	0	0	0	0	0	0	0	0	0	0	0	0	0	0	0	0	0	0	0	0	0	0	0	0	0	0	0	0	0	0	0	0
ENSG00000261798	AL033527.3	0	0	0	0	0	0	0	0	0	1	0	0	0	0	0	0	0	0	0	0	0	0	0	0	0	0	0	0	0	0	0	0	0	0	0	0	0	0
ENSG00000043514	TRIT1	5	4	33	7	4	1	20	16	19	15	22	16	0	0	42	0	0	0	0	117	0	0	3	0	17	6	0	0	0	19	39	64	0	1	0	0	0	0
ENSG00000202222	Y_RNA	0	0	0	0	0	0	2	0	3	5	2	0	0	1	0	0	0	0	0	0	0	0	0	0	0	0	0	0	0	23	0	0	0	0	0	0	0	0
ENSG00000116990	MYCL	5	1	7	1	0	0	10	0	10	4	5	5	0	0	0	0	0	0	0	0	0	0	0	0	0	0	0	0	0	35	0	24	0	0	0	0	0	0
ENSG00000207356	Y_RNA	0	0	0	0	0	0	0	0	0	0	1	0	0	0	0	0	0	0	0	0	0	0	0	0	0	0	0	0	0	0	0	0	0	0	0	0	0	0
ENSG00000168389	MFSD2A	1	15	20	16	0	93	93	47	74	22	67	50	0	3	0	0	0	0	0	0	0	0	45	0	7	0	101	0	0	229	0	45	0	0	0	0	0	1
ENSG00000228477	AL663070.1	1	0	0	0	0	0	1	0	1	0	0	0	0	0	0	0	0	2	0	0	0	0	0	0	0	0	0	0	0	1	0	1	0	0	0	0	0	0
ENSG00000131236	CAP1	988	785	745	848	757	802	864	702	806	1083	655	819	18	212	270	389	324	92	152	111	158	0	114	155	337	234	541	133	215	4009	177	2234	0	4	1	1	0	9
ENSG00000131238	PPT1	901	694	687	761	673	519	1020	1045	999	998	823	924	74	109	170	106	286	141	127	73	156	8	97	15	605	408	516	48	219	5249	393	1538	0	1	2	5	3	10
ENSG00000226745	AL512599.1	0	0	0	0	0	0	3	0	0	0	0	0	0	0	0	0	0	0	0	0	0	0	0	0	0	0	0	0	0	51	0	0	0	0	0	0	0	0
ENSG00000117000	RLF	6	43	40	30	6	42	24	67	39	32	32	44	0	0	0	0	87	0	0	0	16	0	0	0	71	1	98	0	62	349	0	64	0	0	0	0	0	0
ENSG00000207508	RNU6-1237P	0	0	0	9	0	0	0	0	0	6	0	0	0	0	0	0	0	0	0	0	0	0	0	0	0	0	0	0	0	0	0	0	0	0	0	0	0	0
ENSG00000259943	AL050341.2	0	0	0	0	0	23	5	3	7	7	4	6	0	0	0	0	0	0	0	0	0	0	0	0	0	0	0	0	0	0	0	0	0	0	0	0	0	0
ENSG00000084073	ZMPSTE24	76	64	116	81	97	140	170	74	192	219	161	162	4	5	0	0	151	0	46	0	0	0	0	0	0	1	105	25	0	983	1	647	0	0	0	1	0	1
ENSG00000049089	COL9A2	7	8	0	27	11	1	115	60	95	65	81	61	0	2	0	0	0	0	0	0	0	0	1	0	35	2	0	0	0	330	0	76	0	1	0	0	0	0
ENSG00000227311	AL031985.2	0	0	1	0	0	0	0	0	0	0	0	1	0	0	3	0	0	1	0	0	0	0	0	0	0	0	1	0	3	0	0	4	0	0	0	3	0	0
ENSG00000084070	SMAP2	167	32	162	135	94	99	72	85	81	80	94	77	0	1	249	10	33	173	2	0	10	2	1	0	198	46	155	0	147	250	54	405	1	1	0	1	0	4
ENSG00000213172	AL031985.1	0	0	0	0	0	0	0	0	0	2	0	4	0	1	0	0	0	0	2	0	0	0	0	0	0	0	17	26	0	1	0	0	0	0	0	0	0	0
ENSG00000284677	AL031985.4	0	0	0	0	0	0	1	0	0	0	0	0	0	0	0	0	0	0	0	0	0	0	0	0	0	0	0	0	0	0	0	0	0	0	0	0	0	0
ENSG00000187801	ZFP69B	2	0	0	0	0	0	0	0	0	4	0	0	0	0	0	0	0	0	0	0	0	0	0	0	0	0	0	0	11	0	0	0	0	0	0	0	0	0
ENSG00000260920	AL031985.3	0	7	3	12	0	0	9	0	4	10	2	0	0	0	0	0	0	0	0	0	0	0	0	0	0	0	0	0	0	0	0	0	0	0	0	0	0	0
ENSG00000187815	ZFP69	10	0	1	0	0	0	5	1	7	5	2	3	0	0	0	0	0	0	0	0	0	0	0	0	0	0	0	0	0	47	0	0	0	0	0	0	0	0
ENSG00000164002	EXO5	0	30	1	9	0	12	5	17	4	12	9	3	0	0	0	0	20	0	0	0	0	0	0	0	0	1	0	0	0	62	0	46	0	0	0	0	1	0
ENSG00000117010	ZNF684	8	3	8	10	0	15	2	6	4	10	14	4	1	0	46	0	0	0	140	0	0	1	0	0	37	0	74	0	1	73	0	0	0	0	1	0	0	1
ENSG00000117016	RIMS3	0	4	5	3	1	0	2	1	1	5	1	6	0	1	0	1	0	0	0	0	40	0	0	0	1	0	6	0	0	86	2	2	0	0	0	0	0	0
ENSG00000272145	NFYC-AS1	0	0	0	0	0	1	0	0	0	0	0	0	0	0	0	0	0	0	0	0	0	0	0	0	0	0	0	0	0	0	0	0	0	0	0	0	0	0
ENSG00000066136	NFYC	25	19	40	32	65	77	20	20	34	25	31	32	0	39	0	87	0	0	10	0	5	1	2	33	21	0	16	0	45	122	0	1	0	0	0	0	0	0
ENSG00000117013	KCNQ4	0	0	0	0	0	0	0	0	5	3	5	0	0	0	0	0	0	0	0	0	0	0	0	0	0	0	0	0	0	0	0	0	0	0	0	0	0	0
ENSG00000179862	CITED4	0	5	10	10	0	0	7	15	7	18	12	32	0	1	0	0	57	4	0	1	0	0	0	0	0	77	0	0	100	99	0	91	0	0	0	0	0	0
ENSG00000171793	CTPS1	0	0	0	8	11	0	5	0	30	20	11	10	0	0	0	62	0	0	0	0	0	0	0	0	1	0	0	59	1	52	0	0	0	0	0	0	0	0
ENSG00000281207	SLFNL1-AS1	0	0	0	0	0	0	0	0	1	0	0	0	0	0	0	0	0	0	0	0	0	0	0	0	0	0	0	0	0	0	0	0	0	0	0	0	0	0
ENSG00000171790	SLFNL1	0	0	0	0	0	0	1	0	0	1	0	0	0	0	0	0	0	0	0	0	0	0	0	0	0	0	0	0	0	0	0	0	0	0	0	0	0	0
ENSG00000010803	SCMH1	0	13	2	2	5	9	30	1	4	9	13	35	213	1	0	0	125	0	0	0	92	0	0	0	0	1	1	0	0	138	6	92	0	0	0	0	0	0
ENSG00000215893	RPL23AP17	0	0	0	1	0	0	0	0	0	0	0	0	0	0	0	0	0	0	0	0	0	0	0	0	0	0	0	0	0	0	0	0	0	0	0	0	0	0
ENSG00000235358	AC093151.3	0	0	0	0	0	0	0	0	0	0	0	6	0	0	0	0	0	0	8	0	0	0	0	0	0	0	0	0	0	27	0	0	0	0	0	0	0	0
ENSG00000204060	FOXO6	15	0	0	7	1	0	39	38	31	64	48	25	2	1	0	0	0	0	1	0	0	0	1	0	0	0	0	0	0	161	0	48	0	0	0	0	0	1
ENSG00000229901	AC093151.2	0	0	0	0	0	0	3	0	0	2	2	0	0	0	0	0	0	0	0	0	0	0	0	0	0	0	0	0	0	8	0	0	0	0	0	0	0	0
ENSG00000127129	EDN2	0	0	0	0	0	0	1	1	4	11	2	2	0	0	0	0	0	0	0	0	0	0	0	0	0	0	0	0	0	0	0	0	0	0	0	0	0	0
ENSG00000127124	HIVEP3	63	32	3	11	29	0	4	17	10	17	8	7	1	0	0	0	0	0	25	1	207	63	0	0	1	0	45	0	19	2	0	0	0	0	0	0	0	1
ENSG00000230638	AL445933.1	0	0	0	0	0	0	0	1	0	0	0	0	0	0	0	0	0	0	0	0	0	0	0	0	0	0	0	0	0	0	0	0	0	0	0	0	0	0
ENSG00000227538	HNRNPFP1	0	0	1	0	0	0	0	0	0	0	0	1	0	0	0	0	0	0	0	0	0	0	0	0	0	0	0	0	0	0	0	10	0	0	0	0	0	0
ENSG00000198815	FOXJ3	28	28	36	43	32	32	33	41	42	56	32	33	1	0	115	102	0	0	34	0	32	1	0	0	45	24	36	0	0	229	0	413	0	0	0	0	0	1
ENSG00000177181	RIMKLA	0	0	0	0	0	0	3	0	0	0	0	0	0	0	0	0	0	0	0	0	0	0	0	0	0	0	0	0	0	0	0	0	0	0	0	0	0	0
ENSG00000066185	ZMYND12	1	1	14	1	0	0	9	6	8	14	10	7	0	0	0	0	0	0	0	0	0	0	1	0	0	0	0	0	0	36	0	0	0	0	0	0	0	0
ENSG00000127125	PPCS	199	255	213	266	143	241	369	398	401	496	414	346	1	7	95	54	95	63	0	2	54	3	49	0	260	3	274	24	184	1951	53	361	2	15	0	1	0	2
ENSG00000186409	CCDC30	0	6	8	0	0	0	32	17	17	27	20	16	0	1	0	0	0	0	0	0	0	0	0	0	0	0	0	0	80	53	0	161	0	0	0	0	0	0
ENSG00000230116	AL445669.1	0	0	0	0	0	0	0	0	0	0	0	0	0	0	0	0	0	0	0	0	0	0	0	0	1	0	0	0	0	0	0	0	0	0	0	0	0	0
ENSG00000236876	TMSB4XP1	50	86	48	86	86	54	39	34	23	21	96	30	34	1	69	141	172	0	81	33	15	1	2	35	67	0	51	1	0	221	62	196	0	0	41	0	0	0
ENSG00000236180	AL445669.2	0	0	0	0	0	0	1	0	0	0	0	0	0	0	0	0	0	0	0	0	0	0	0	0	0	0	0	0	0	0	0	0	0	0	0	0	0	0
ENSG00000171960	PPIH	4	35	56	65	45	86	58	47	102	101	94	49	10	1	0	0	17	37	70	0	0	0	0	0	0	1	1	0	78	661	139	304	0	0	0	0	0	0
ENSG00000234917	AC098484.2	18	0	0	0	0	0	4	2	6	4	3	0	0	0	0	0	0	0	0	0	0	0	0	0	0	0	0	0	0	0	0	0	0	0	0	0	0	0
ENSG00000065978	YBX1	143	182	169	155	159	88	50	46	48	67	44	56	93	122	122	130	160	78	63	0	2	0	1	0	31	3	170	20	72	401	13	49	0	0	1	1	0	1
ENSG00000164007	CLDN19	0	0	0	0	0	0	0	0	1	0	0	0	0	0	0	0	0	0	0	0	0	0	0	0	0	0	0	0	0	0	0	0	0	0	0	0	0	0
ENSG00000117385	P3H1	15	66	89	35	22	16	12	14	20	36	11	13	2	0	119	29	1	12	0	0	6	0	0	0	2	1	17	0	168	41	64	215	0	0	0	0	0	0
ENSG00000164008	C1orf50	0	0	0	4	0	0	0	0	4	0	0	4	0	252	0	8	0	0	0	0	0	0	0	0	0	0	0	0	0	0	1	31	0	0	0	0	0	0
ENSG00000274386	TMEM269	0	0	0	0	0	0	0	0	0	5	0	0	0	0	0	0	0	0	0	0	0	0	0	0	0	0	0	0	0	0	0	0	0	0	0	0	0	0
ENSG00000177868	SVBP	0	16	13	35	35	18	9	10	19	3	12	16	0	0	0	26	0	0	0	0	0	0	0	0	0	0	0	34	11	0	89	0	0	0	0	0	0	0
ENSG00000164010	ERMAP	46	33	63	70	37	14	9	24	27	30	11	39	0	0	0	0	0	0	0	0	0	0	0	0	0	0	23	0	60	79	0	0	0	0	0	0	0	0
ENSG00000164011	ZNF691	2	0	12	0	1	0	5	4	1	6	1	6	0	0	0	0	0	0	0	0	0	0	0	0	44	15	0	0	0	56	0	0	0	0	0	0	0	0
ENSG00000233708	AL512353.2	0	0	0	0	0	0	0	0	0	0	1	0	0	0	0	0	0	0	0	0	0	0	0	0	0	0	0	0	0	0	0	0	0	0	0	0	0	0
ENSG00000225099	ATP6V1E1P1	6	1	4	9	1	9	3	0	2	8	8	10	0	0	0	0	0	0	0	0	0	0	0	0	0	0	0	0	0	1	0	9	0	0	0	0	0	0
ENSG00000117394	SLC2A1	319	275	348	286	237	304	255	200	250	259	336	259	85	7	187	110	84	9	2	36	52	60	2	23	48	60	142	0	76	1839	76	908	0	1	1	0	2	4
ENSG00000227533	SLC2A1-AS1	0	6	0	0	0	0	0	10	8	2	5	0	0	0	0	0	0	0	0	0	0	0	0	0	0	0	0	0	79	92	0	0	0	0	0	0	0	0
ENSG00000117395	EBNA1BP2	48	53	67	39	3	78	109	97	97	138	114	114	38	126	55	13	184	0	1	0	0	0	0	0	48	1	76	0	28	769	72	352	0	0	1	0	0	0
ENSG00000243710	CFAP57	9	0	1	4	26	0	1	0	5	4	3	5	0	0	0	0	0	0	0	0	0	0	0	10	0	0	0	0	0	41	0	0	0	0	0	0	0	1
ENSG00000179178	TMEM125	0	0	0	0	0	0	21	9	17	19	26	30	0	1	0	0	0	0	0	0	0	0	0	0	80	0	0	0	0	91	6	3	0	0	0	0	0	0
ENSG00000253313	C1orf210	0	0	0	0	0	0	13	24	18	26	10	17	0	1	0	1	0	0	0	0	0	0	0	0	0	0	0	0	0	217	0	24	0	0	0	0	0	0
ENSG00000066056	TIE1	17	13	30	12	31	8	10	0	1	4	0	0	0	0	58	0	0	0	7	44	0	0	0	0	0	1	44	36	77	2	0	0	0	0	0	0	0	0
ENSG00000234694	AL139289.2	1	0	0	0	0	0	2	0	0	1	3	0	0	0	0	0	0	0	0	0	0	0	0	0	0	0	0	0	59	0	0	0	0	0	0	0	0	0
ENSG00000117399	CDC20	0	0	0	1	0	0	0	0	4	0	0	0	0	0	0	0	0	0	0	0	0	0	0	0	0	0	0	0	0	0	0	30	0	0	0	0	0	0
ENSG00000066322	ELOVL1	2	20	41	28	31	76	47	42	44	49	42	48	3	0	170	4	0	0	6	1	0	0	1	0	5	39	18	0	69	237	0	228	0	0	0	1	0	0
ENSG00000159479	MED8	41	87	76	70	108	66	79	92	84	70	67	100	20	11	52	0	125	0	14	0	0	0	0	0	48	1	89	54	0	574	0	78	0	1	0	0	1	0
ENSG00000198198	SZT2	0	12	11	14	43	11	8	6	6	13	8	9	0	0	49	0	0	0	46	0	0	0	0	0	0	0	2	0	0	67	0	11	0	0	0	0	0	1
ENSG00000229372	SZT2-AS1	0	0	0	0	0	0	0	0	0	11	0	1	0	0	0	0	0	0	0	0	0	0	0	0	0	0	0	0	0	6	0	0	0	0	0	0	0	0
ENSG00000178922	HYI	14	34	20	26	18	2	26	17	31	48	26	42	17	0	0	44	34	1	1	0	0	0	0	0	1	2	41	0	97	132	0	160	0	0	0	0	0	0
ENSG00000142949	PTPRF	164	108	141	79	176	105	1287	1284	1435	2536	1394	1761	168	131	380	2	556	63	3	4	5	2	172	115	592	484	439	88	307	7693	166	5103	4	2	0	2	194	8
ENSG00000066135	KDM4A	75	88	38	55	10	51	32	14	24	82	64	51	14	1	56	0	137	0	39	0	0	0	0	29	0	0	1	0	109	346	0	25	0	1	2	2	2	1
ENSG00000236200	KDM4A-AS1	0	0	0	0	0	0	0	0	0	0	0	0	0	1	0	0	0	0	0	0	0	0	0	0	0	1	9	0	0	20	0	0	0	0	0	0	0	0
ENSG00000126091	ST3GAL3	1	0	0	10	6	1	8	0	5	5	5	17	1	0	0	1	0	0	0	0	0	0	0	0	0	0	0	0	0	77	0	46	0	0	0	0	0	0
ENSG00000229444	AL451062.1	0	0	0	0	0	0	0	0	0	0	1	0	0	0	0	0	0	0	0	0	0	0	0	0	0	0	0	0	0	0	0	0	0	0	0	0	0	0
ENSG00000117407	ARTN	0	0	0	0	0	0	1	6	0	2	3	8	0	0	0	0	0	0	0	0	0	0	0	0	0	0	0	0	0	0	0	0	0	0	0	0	0	0
ENSG00000117408	IPO13	9	44	22	17	13	4	16	10	16	14	13	28	0	0	0	0	4	0	0	0	0	0	0	0	0	0	49	0	5	73	5	129	0	0	0	0	0	0
ENSG00000132768	DPH2	8	30	9	11	11	1	36	30	49	32	26	46	2	1	57	0	1	23	0	0	0	2	0	0	38	1	70	0	0	314	0	0	0	0	0	0	0	1
ENSG00000117410	ATP6V0B	127	154	139	95	163	52	121	125	171	214	214	133	2	1	170	66	84	0	0	0	28	0	0	20	110	1	422	84	161	708	63	678	0	1	0	0	0	5
ENSG00000117411	B4GALT2	17	68	68	47	72	42	83	78	107	95	103	73	2	30	0	0	122	0	78	13	1	1	0	1	89	76	59	0	121	644	153	318	1	0	0	0	0	0
ENSG00000159214	CCDC24	1	6	18	3	20	0	27	48	29	64	49	40	0	1	55	0	126	0	27	0	0	0	0	0	104	0	68	0	1	265	0	93	0	0	0	1	0	0
ENSG00000196517	SLC6A9	0	13	4	16	0	0	153	51	113	140	133	95	0	4	0	0	0	0	23	0	0	0	0	0	8	3	1	0	0	407	0	245	0	0	0	0	0	0
ENSG00000230615	AL139220.2	1	0	21	3	1	0	7	1	8	17	2	14	0	0	0	0	19	0	0	0	0	0	0	0	0	0	0	0	0	10	0	3	0	0	0	0	1	0
ENSG00000227163	AL139220.1	0	0	0	0	0	0	0	1	0	0	0	3	0	0	0	0	0	0	0	0	0	0	0	0	0	0	0	0	0	3	0	0	0	0	0	0	1	0
ENSG00000271647	KRT8P47	0	0	0	0	0	0	0	0	0	0	0	0	0	0	0	0	0	0	0	0	0	0	0	0	0	0	0	0	0	0	6	0	0	0	0	0	0	0
ENSG00000239560	RN7SL479P	0	0	0	0	0	0	0	0	0	0	0	0	0	0	0	0	0	0	0	0	0	0	0	0	0	0	0	0	0	0	0	4	0	0	0	0	0	0
ENSG00000171872	KLF17	0	1	0	0	0	0	0	4	1	0	0	0	1	0	0	0	0	0	0	0	0	0	0	0	0	0	0	0	0	0	0	1	0	0	0	0	0	0
ENSG00000233514	AL356653.1	0	0	0	0	0	0	1	0	3	1	2	4	0	0	0	0	0	0	0	0	3	0	0	8	0	0	0	0	0	52	0	24	0	0	0	0	0	0
ENSG00000178028	DMAP1	0	0	0	1	0	0	0	0	0	0	0	0	0	0	0	0	0	0	0	0	1	0	0	0	0	0	0	0	0	0	0	0	0	0	0	0	0	0
ENSG00000117419	ERI3	0	0	4	0	0	0	1	6	4	1	0	5	170	0	0	0	0	0	0	0	0	0	0	0	0	0	4	1	0	38	0	5	0	0	0	1	0	0
ENSG00000187147	RNF220	106	81	135	104	51	77	60	44	57	84	74	61	1	0	0	66	78	0	110	0	7	0	1	1	170	3	56	0	1	393	61	131	0	0	0	0	0	2
ENSG00000126106	TMEM53	0	1	12	1	24	0	15	14	10	11	12	6	0	1	0	0	0	0	0	0	0	0	0	0	0	51	1	2	0	103	32	0	0	0	0	0	0	0
ENSG00000198520	C1orf228	0	0	0	0	0	0	0	3	0	6	0	1	0	1	0	0	0	32	1	0	0	0	0	0	0	0	0	0	0	0	0	0	0	0	0	0	0	0
ENSG00000142945	KIF2C	3	0	9	2	3	0	17	37	31	15	28	34	0	0	0	0	0	0	0	0	0	0	0	0	0	2	0	0	0	138	0	36	0	0	0	0	1	0
ENSG00000225721	AL592166.1	0	0	0	0	0	0	0	0	1	0	0	0	0	0	0	0	0	0	0	0	0	0	0	0	0	0	0	0	0	0	0	0	0	0	0	0	0	0
ENSG00000142937	RPS8	29	37	29	26	32	50	16	8	18	18	18	13	0	0	24	5	16	0	3	1	36	1	0	0	4	1	40	32	35	93	12	93	65	1	0	6	0	0
ENSG00000202031	SNORD38A	0	4	0	0	0	0	0	0	0	0	0	0	0	0	0	0	0	0	0	0	0	0	0	0	0	0	0	0	0	0	0	0	0	0	0	0	0	0
ENSG00000234093	RPS15AP11	2	6	7	8	7	0	8	2	4	5	1	7	0	0	2	4	1	0	1	0	0	0	0	0	3	0	4	1	10	19	4	10	0	0	0	0	0	1
ENSG00000142959	BEST4	0	0	0	0	0	0	0	4	2	0	2	0	0	0	0	0	0	0	0	0	0	0	0	0	0	0	0	0	0	19	0	0	0	0	0	0	0	0
ENSG00000173846	PLK3	7	55	52	27	31	19	7	2	14	7	8	22	0	1	1	25	0	0	0	0	0	0	0	0	0	0	0	0	91	190	0	137	0	0	0	0	0	0
ENSG00000188396	TCTEX1D4	16	0	1	0	0	0	7	0	1	0	0	0	0	0	0	0	0	0	0	0	0	0	0	0	0	0	0	0	0	0	0	0	0	0	0	0	0	0
ENSG00000222009	BTBD19	46	12	31	0	1	24	6	2	2	12	4	0	0	1	0	0	0	0	0	241	1	1	1	0	0	1	14	1	5	30	9	3	0	0	0	0	0	0
ENSG00000117425	PTCH2	11	20	27	9	25	57	0	0	0	13	8	0	47	0	0	0	94	0	47	0	0	0	0	0	0	0	0	0	0	0	0	31	0	0	0	1	0	0
ENSG00000226499	AL136380.1	184	178	194	168	86	117	146	92	76	92	79	146	87	338	206	1	160	3	2	115	0	0	0	97	282	216	149	1	150	973	287	531	1	1	0	0	1	1
ENSG00000070785	EIF2B3	12	21	24	41	12	11	27	5	34	51	14	16	0	0	0	0	0	0	0	41	0	0	0	0	0	1	48	0	0	111	0	72	0	0	0	0	0	0
ENSG00000232369	PPIAP35	0	2	4	1	19	1	0	0	0	0	2	0	0	0	0	0	0	0	0	0	0	7	0	0	0	0	0	0	0	0	0	0	0	0	4	0	0	0
ENSG00000268949	MRPS17P1	13	19	7	56	0	0	33	19	44	8	25	20	0	0	23	0	0	0	0	44	0	0	0	0	0	10	4	0	0	100	156	39	0	0	0	0	0	0
ENSG00000126107	HECTD3	15	46	26	35	64	26	37	42	33	45	55	65	0	2	33	0	77	0	0	8	0	0	0	0	34	42	41	0	21	389	169	106	0	0	0	0	0	0
ENSG00000126088	UROD	21	5	32	0	8	0	0	4	4	13	15	9	0	0	154	1	0	0	0	0	0	0	0	0	0	0	26	0	0	42	0	143	0	0	0	1	0	0
ENSG00000162415	ZSWIM5	0	4	0	0	0	0	0	0	0	1	1	0	0	0	0	0	0	0	36	0	0	0	0	0	0	0	0	0	36	0	135	0	0	0	0	0	0	0
ENSG00000281912	LINC01144	0	0	0	1	0	0	0	0	4	1	8	0	0	0	0	0	0	0	0	0	0	0	0	0	0	0	0	0	0	0	0	0	0	0	0	0	0	0
ENSG00000186603	HPDL	0	0	1	1	0	0	11	3	8	6	8	8	0	0	0	0	0	0	0	0	0	0	0	0	0	0	0	0	0	0	0	16	0	0	0	0	0	0
ENSG00000132781	MUTYH	0	0	0	0	0	0	0	0	1	3	0	2	0	0	0	0	0	0	0	0	0	0	16	0	1	0	0	0	0	0	0	1	0	0	0	0	0	0
ENSG00000132773	TOE1	51	20	10	21	27	1	34	14	40	60	46	48	0	1	1	36	0	0	0	0	0	0	0	0	0	1	1	0	47	252	0	173	0	0	0	1	0	1
ENSG00000070759	TESK2	19	25	11	22	8	0	22	18	26	17	23	15	0	0	0	0	0	0	0	0	0	0	0	0	0	0	0	0	0	107	0	123	0	0	0	0	0	0
ENSG00000236872	PPIAP36	0	0	7	0	0	0	0	1	0	0	0	0	0	0	0	0	0	0	0	0	0	1	0	0	0	0	4	0	0	0	0	0	0	0	0	0	0	0
ENSG00000280670	CCDC163	0	4	0	1	0	12	1	6	0	0	3	0	1	0	0	98	0	0	0	1	0	0	0	0	0	0	0	0	10	53	0	181	0	0	0	0	0	0
ENSG00000132763	MMACHC	2	5	0	0	0	0	11	0	8	16	13	14	0	0	0	0	6	0	0	0	0	0	0	0	63	0	0	0	0	0	0	0	0	0	0	0	0	0
ENSG00000117450	PRDX1	732	645	642	703	683	469	864	807	1009	1403	870	1110	145	28	306	475	258	68	182	77	2	2	20	56	353	223	961	42	326	3832	76	2191	1	3	2	1	3	10
ENSG00000117448	AKR1A1	130	168	182	199	161	120	140	71	166	246	171	165	5	235	144	149	152	0	31	1	0	40	5	0	106	39	62	34	114	1093	1	258	0	1	0	1	1	1
ENSG00000132780	NASP	11	26	41	43	6	2	29	17	19	33	37	30	17	0	0	0	258	0	0	0	0	0	0	0	1	0	70	0	0	357	1	26	0	0	0	0	0	0
ENSG00000159588	CCDC17	0	0	0	0	0	0	0	0	2	0	2	0	0	0	0	0	0	0	0	0	0	0	0	0	0	0	0	0	0	0	0	0	0	0	0	0	0	0
ENSG00000159592	GPBP1L1	342	276	253	244	147	169	441	415	386	374	361	419	5	43	164	241	193	2	205	5	12	53	2	19	291	185	234	26	323	2175	147	935	0	2	0	0	1	4
ENSG00000225447	RPS15AP10	4	0	0	0	0	0	0	6	0	0	2	0	0	0	0	0	0	0	0	0	0	0	0	0	0	0	0	0	0	0	0	1	0	0	0	0	0	0
ENSG00000159596	TMEM69	5	23	31	46	26	30	18	14	14	48	21	27	74	2	42	0	0	93	0	0	0	0	0	0	0	2	29	0	22	66	11	122	0	0	0	0	0	0
ENSG00000197429	IPP	6	10	17	7	0	18	16	18	20	26	23	22	1	0	0	1	55	29	59	0	1	44	0	0	0	1	10	0	70	45	0	2	0	0	0	1	0	0
ENSG00000230896	AL604028.1	8	6	0	3	0	10	12	9	1	7	9	1	0	10	0	0	0	0	3	0	0	0	0	0	0	0	19	0	0	0	0	83	0	0	0	0	0	0
ENSG00000236111	AL603882.1	6	4	12	23	13	16	7	7	11	9	3	7	49	1	6	0	0	0	0	0	0	0	4	7	15	2	9	0	6	92	6	62	0	0	0	1	0	0
ENSG00000086015	MAST2	0	0	6	0	0	0	0	0	0	1	2	3	0	0	0	0	0	0	0	0	0	0	0	0	0	0	17	21	0	31	0	2	0	0	0	0	0	0
ENSG00000232467	TMA16P2	0	17	13	10	4	22	13	0	3	13	6	8	0	0	0	0	0	0	0	0	1	0	0	0	0	0	5	0	0	62	17	0	0	0	0	0	0	0
ENSG00000117461	PIK3R3	7	22	28	2	0	0	38	50	59	64	55	107	94	2	21	47	0	30	0	45	0	0	1	0	0	0	19	0	1	439	0	108	0	0	0	1	0	0
ENSG00000233114	AL358075.3	11	0	0	1	0	0	4	0	1	0	0	0	0	0	0	0	0	0	0	0	0	0	0	0	0	0	0	0	0	9	0	0	0	0	0	0	0	0
ENSG00000227857	AL358075.2	0	0	0	0	0	0	0	0	1	0	0	0	0	0	0	0	0	0	0	0	0	0	0	0	0	0	0	0	0	0	0	0	0	0	0	0	0	0
ENSG00000117472	TSPAN1	7	1	0	1	0	1	80	61	64	78	62	73	1	1	0	0	0	0	0	0	0	0	1	0	58	0	1	0	0	507	1	344	0	1	0	0	0	0
ENSG00000085998	POMGNT1	5	1	13	18	0	16	7	25	15	14	7	25	0	1	0	0	0	0	33	0	0	0	0	0	3	0	20	0	0	89	0	127	0	0	0	0	0	0
ENSG00000171357	LURAP1	0	0	0	3	0	0	0	0	0	4	1	0	0	0	0	0	0	0	0	0	0	0	0	0	0	0	0	0	0	24	0	0	0	0	0	0	0	0
ENSG00000085999	RAD54L	0	9	1	5	0	7	7	0	8	6	8	12	0	0	0	0	0	0	0	0	0	0	0	0	0	0	0	0	0	37	0	0	0	0	0	0	0	0
ENSG00000132128	LRRC41	30	37	26	32	32	0	24	27	35	23	32	9	2	0	0	1	0	0	0	0	0	0	0	0	1	23	25	0	89	128	0	47	0	0	0	0	0	1
ENSG00000173660	UQCRH	116	198	127	155	258	90	116	124	138	139	105	102	0	127	115	83	104	0	344	0	69	1	0	1	249	0	142	119	220	528	0	720	0	0	0	0	1	2
ENSG00000117481	NSUN4	34	12	5	29	32	56	7	9	16	27	30	19	0	0	30	0	0	1	38	0	12	0	0	0	4	1	35	3	0	74	58	69	0	1	0	0	0	3
ENSG00000117480	FAAH	5	7	0	5	2	0	27	57	47	32	39	22	1	0	0	0	0	0	0	0	0	0	12	0	0	0	37	0	0	199	0	0	0	0	0	0	0	0
ENSG00000232022	FAAHP1	0	0	0	0	0	0	0	0	3	0	0	0	0	0	0	0	0	0	0	0	0	0	0	0	0	0	0	0	0	0	0	0	0	0	0	0	0	0
ENSG00000162456	KNCN	0	0	0	0	0	0	0	0	0	0	0	1	0	0	0	0	0	0	0	0	0	0	0	0	0	0	0	0	0	0	0	0	0	0	0	0	0	0
ENSG00000079277	MKNK1	76	73	114	57	117	24	8	0	6	14	6	8	109	68	20	9	0	46	85	0	8	1	2	9	1	1	155	81	1	62	0	162	0	0	0	0	0	0
ENSG00000142961	MOB3C	37	29	37	31	34	26	12	1	4	12	3	2	0	2	19	0	0	0	0	69	0	0	1	0	11	0	13	2	37	30	0	48	0	0	0	0	0	0
ENSG00000123472	ATPAF1	24	52	47	43	34	100	36	34	27	53	25	17	1	1	142	72	0	0	0	0	0	66	1	0	0	2	12	86	0	68	0	19	0	0	1	0	0	0
ENSG00000233647	NENFP1	0	0	0	0	0	0	0	4	0	0	0	0	0	0	0	0	0	0	0	0	0	0	0	0	0	0	0	0	0	0	0	0	0	0	0	0	0	0
ENSG00000186118	TEX38	0	0	0	0	0	0	0	2	0	0	0	0	0	0	0	0	0	0	0	0	0	0	0	0	0	0	0	0	0	0	0	0	0	0	0	0	0	0
ENSG00000159658	EFCAB14	222	125	156	107	76	125	87	79	132	145	89	118	1	14	110	98	175	69	99	0	66	0	4	74	135	1	145	18	98	735	230	250	0	0	0	1	2	2
ENSG00000236476	AL593856.1	4	2	10	1	6	0	3	2	8	4	5	0	1	0	0	0	0	0	13	0	0	0	0	0	2	1	0	0	72	0	0	0	0	0	0	0	0	0
ENSG00000142973	CYP4B1	0	0	0	0	0	0	9	0	3	7	12	0	0	0	0	0	0	0	0	0	0	0	0	0	0	0	0	0	0	24	0	0	0	0	0	0	0	0
ENSG00000154198	CYP4Z2P	0	0	0	0	0	0	6	1	15	27	5	23	0	0	0	0	0	0	0	1	0	0	0	0	0	0	0	0	0	52	0	17	0	0	0	0	0	0
ENSG00000187048	CYP4A11	0	0	0	0	0	0	0	0	1	0	0	0	0	0	0	0	0	0	0	0	0	0	0	0	0	0	0	0	0	0	0	0	0	0	0	0	0	0
ENSG00000186377	CYP4X1	0	15	2	0	0	1	26	11	16	35	9	21	0	2	0	0	0	0	0	0	0	0	0	0	0	0	1	0	0	160	0	0	0	0	0	0	0	1
ENSG00000186160	CYP4Z1	0	0	0	1	0	0	77	49	53	76	66	53	0	3	0	1	0	0	0	0	0	0	0	0	0	0	0	0	1	312	1	170	0	0	0	0	0	0
ENSG00000225506	CYP4A22-AS1	0	0	0	0	0	0	2	2	0	0	0	0	0	0	0	0	0	0	0	0	0	0	0	0	0	0	0	0	0	0	0	0	0	0	0	0	0	0
ENSG00000162365	CYP4A22	0	0	0	1	0	0	0	0	0	0	0	0	0	0	0	0	0	0	0	0	0	0	0	0	0	0	0	0	0	0	0	0	0	0	0	0	0	0
ENSG00000224805	LINC00853	0	0	0	0	0	0	2	0	0	0	0	0	0	0	0	0	0	0	0	0	0	0	0	0	0	0	0	0	0	0	0	0	0	0	0	0	0	0
ENSG00000162366	PDZK1IP1	0	0	0	0	0	0	58	36	41	53	26	20	0	1	0	0	0	0	0	0	0	0	0	0	146	68	0	0	0	271	1	1	0	0	0	0	0	0
ENSG00000162367	TAL1	0	6	25	10	0	13	0	4	4	0	3	0	0	0	0	0	0	0	43	25	0	0	0	0	0	0	0	0	1	32	0	0	0	0	0	0	0	0
ENSG00000226252	AL135960.1	0	0	0	0	0	0	0	0	0	0	0	0	0	0	0	0	0	0	0	0	0	0	0	0	0	0	0	6	0	0	0	0	0	0	0	0	0	0
ENSG00000123473	STIL	0	0	1	21	0	0	3	2	4	7	3	15	0	0	0	0	0	0	0	0	0	0	0	0	0	0	0	0	0	1	0	0	0	0	0	0	0	0
ENSG00000162368	CMPK1	213	92	148	152	113	245	102	91	75	122	104	111	251	4	12	26	54	22	90	2	44	0	0	0	89	70	57	167	84	339	91	70	0	0	0	0	0	1
ENSG00000225762	LINC01389	0	0	0	0	0	0	4	0	0	0	0	0	0	0	0	0	0	0	0	0	0	0	0	0	0	0	0	0	0	0	0	0	0	0	0	0	0	0
ENSG00000186790	FOXE3	0	7	0	0	0	0	0	0	0	0	0	0	0	0	0	0	0	0	0	0	0	0	0	0	0	0	0	0	0	0	0	0	0	0	0	0	0	0
ENSG00000237424	FOXD2-AS1	0	0	2	0	0	0	0	0	0	0	3	8	0	0	4	0	0	0	0	0	0	0	0	0	0	0	0	0	6	0	0	0	0	0	0	1	0	0
ENSG00000186564	FOXD2	0	1	0	0	0	0	14	3	5	17	16	6	0	0	0	0	1	0	0	0	0	0	0	0	0	0	0	0	0	44	0	0	0	0	0	0	0	0
ENSG00000269113	TRABD2B	0	0	0	6	0	15	6	2	2	0	1	8	0	0	0	0	0	0	0	0	0	0	0	0	0	0	0	0	52	0	0	0	0	0	0	0	0	0
ENSG00000117834	SLC5A9	0	0	0	0	0	0	0	0	0	1	0	0	0	0	0	0	1	0	0	0	0	0	0	0	0	0	0	0	0	0	0	0	0	0	0	0	0	0
ENSG00000132122	SPATA6	0	0	0	8	0	0	19	12	11	24	11	25	2	0	0	36	0	0	0	0	0	0	0	0	0	1	0	0	0	182	2	0	0	0	0	0	1	0
ENSG00000223175	RNU4-61P	0	0	1	0	0	0	0	0	0	0	0	0	0	0	0	0	0	0	0	0	0	0	0	0	0	0	0	0	0	0	0	0	0	0	0	0	0	0
ENSG00000186094	AGBL4	9	0	0	0	4	0	0	2	0	0	0	5	0	0	0	0	0	0	0	0	0	0	0	0	0	0	0	0	0	0	0	0	0	0	0	0	0	0
ENSG00000162373	BEND5	1	0	12	0	0	0	3	0	1	0	0	2	0	0	0	0	0	0	0	0	0	0	0	0	0	0	0	0	97	1	8	1	0	0	0	0	0	0
ENSG00000162374	ELAVL4	0	0	0	0	0	0	1	0	0	0	2	0	0	0	0	0	0	0	0	0	0	0	0	0	0	0	0	0	0	0	0	0	0	0	0	0	0	0
ENSG00000284696	AL596275.2	0	1	0	0	0	0	0	0	0	0	0	0	0	0	0	0	0	0	0	0	0	0	0	0	0	0	0	0	0	0	0	0	0	0	0	0	0	0
ENSG00000234080	AL596275.1	0	4	6	4	0	0	0	0	0	0	1	0	0	0	0	0	0	0	0	0	0	0	0	0	16	0	0	0	117	6	0	0	0	0	0	0	0	0
ENSG00000225671	FCF1P6	0	9	7	0	0	0	2	0	0	0	2	1	0	0	0	0	2	0	0	0	0	0	0	0	0	0	0	0	0	0	0	0	0	0	0	0	0	0
ENSG00000185104	FAF1	15	22	53	16	47	47	55	37	35	53	15	33	1	2	0	0	0	14	0	18	0	0	0	0	1	3	16	0	10	191	0	106	0	0	0	0	0	0
ENSG00000237130	MRPS6P2	6	4	0	6	31	8	3	0	7	10	7	3	0	0	0	0	0	0	0	0	0	0	0	0	0	0	7	0	0	0	0	0	0	0	0	0	0	0
ENSG00000123080	CDKN2C	50	35	40	19	74	33	0	7	11	2	16	6	0	1	28	0	26	70	1	134	59	0	0	0	0	0	1	1	0	101	0	0	0	0	0	0	0	0
ENSG00000200262	Y_RNA	0	0	0	0	0	0	0	0	0	0	0	0	0	0	0	0	0	0	0	0	0	0	0	0	0	0	0	0	0	1	0	1	0	0	0	0	0	0
ENSG00000213478	CFL1P2	0	0	0	0	0	0	2	0	0	0	0	0	0	0	0	0	0	0	0	0	0	0	0	0	0	0	0	0	0	0	0	0	0	0	0	0	0	0
ENSG00000203356	LINC01562	0	0	0	0	0	0	0	0	0	0	0	2	0	0	0	0	0	0	0	0	0	0	0	0	0	0	0	0	0	0	0	0	0	0	0	0	0	0
ENSG00000123091	RNF11	213	170	104	119	176	100	96	119	119	117	110	113	1	1	144	117	131	177	78	196	105	1	2	47	19	68	230	0	0	411	45	346	0	0	0	0	1	1
ENSG00000233406	AL162430.1	0	0	0	0	0	0	0	0	0	0	0	0	0	0	0	0	0	0	0	0	0	0	0	0	0	0	0	0	28	14	0	1	0	0	0	0	0	0
ENSG00000085831	TTC39A	0	1	7	1	0	0	31	34	31	22	44	67	0	0	0	0	0	0	135	0	0	2	0	0	13	0	1	0	20	222	0	147	0	0	0	0	0	1
ENSG00000261664	TTC39A-AS1	0	0	0	0	0	0	0	0	2	0	2	0	0	0	0	0	0	0	0	0	0	0	0	0	0	0	0	0	0	0	0	0	0	0	0	0	0	0
ENSG00000085832	EPS15	238	174	118	160	170	36	34	59	41	80	53	36	6	57	91	87	0	5	7	0	267	2	0	48	169	19	183	127	49	222	21	190	0	0	0	2	0	1
ENSG00000232027	AL671986.1	0	0	0	1	0	0	0	0	0	0	0	0	0	0	0	0	0	0	0	0	0	0	0	0	0	0	0	0	0	12	0	4	0	0	0	0	0	0
ENSG00000227070	AC104170.1	16	0	0	0	4	0	0	2	7	11	3	5	0	0	0	0	0	0	0	0	0	0	0	0	25	0	0	0	0	0	0	0	0	0	0	0	0	0
ENSG00000227742	CALR4P	0	0	0	0	0	0	0	0	1	0	1	0	0	0	0	0	0	0	0	0	0	0	0	0	0	0	0	0	0	0	0	0	0	0	0	0	0	0
ENSG00000117859	OSBPL9	140	57	79	93	83	119	30	42	40	83	30	75	0	39	156	54	115	1	0	0	24	0	0	0	77	1	93	0	129	415	2	237	0	0	0	0	1	1
ENSG00000078618	NRDC	44	69	26	30	93	89	17	16	9	41	13	27	0	0	44	0	0	0	100	0	0	0	0	0	89	147	1	0	6	102	22	236	0	0	0	0	0	1
ENSG00000272175	AL050343.2	0	0	0	0	0	0	0	0	0	0	0	0	0	0	0	0	0	0	0	0	0	0	0	0	0	0	0	0	0	1	0	0	0	0	0	0	0	0
ENSG00000169213	RAB3B	0	0	10	0	0	1	2	22	5	37	0	2	0	0	0	0	0	0	0	0	0	0	0	0	6	0	0	0	0	0	0	113	0	0	0	0	0	0
ENSG00000117862	TXNDC12	59	85	82	68	74	63	56	31	37	79	23	41	212	1	0	0	0	35	56	1	68	0	0	0	0	0	52	0	2	205	0	67	0	0	0	0	0	0
ENSG00000198841	KTI12	11	16	0	30	24	0	7	2	3	5	0	11	0	0	0	0	0	0	0	0	0	0	0	0	28	0	0	0	66	26	0	32	0	0	0	0	0	0
ENSG00000223390	AL445685.1	0	0	0	0	1	0	0	0	0	0	0	1	0	0	0	0	0	0	0	0	0	0	0	0	0	0	5	0	0	0	0	0	0	0	0	0	0	0
ENSG00000134717	BTF3L4	41	98	52	78	54	76	48	31	78	37	21	49	51	4	24	200	5	21	198	0	0	0	0	0	0	0	0	0	0	384	0	11	1	1	0	0	0	1
ENSG00000157077	ZFYVE9	3	9	3	5	3	14	6	4	3	13	13	19	0	0	1	0	0	0	1	27	0	0	0	0	0	0	0	0	37	24	0	0	0	1	0	0	0	0
ENSG00000228407	AL139156.2	3	7	5	3	0	0	1	0	2	3	0	2	0	0	0	0	0	0	0	15	0	0	0	0	0	0	1	0	5	0	0	0	0	1	0	0	0	0
ENSG00000237663	DNAJC19P7	0	0	0	0	0	0	0	0	0	0	0	2	0	0	0	0	0	0	0	0	0	0	0	0	0	0	0	0	0	0	0	0	0	0	0	0	0	0
ENSG00000213735	ANAPC10P1	0	0	0	1	0	0	0	0	0	0	0	0	0	0	0	0	0	0	0	0	0	0	0	0	0	0	0	0	0	0	0	0	0	0	0	0	0	0
ENSG00000154222	CC2D1B	19	9	3	37	0	1	8	6	7	6	2	10	0	0	22	3	0	0	0	0	0	0	0	0	0	1	0	0	100	0	0	107	0	0	0	0	0	0
ENSG00000224680	PLA2G12AP1	0	0	24	0	0	0	0	0	2	3	3	1	0	0	0	0	0	0	0	0	0	0	0	0	0	0	0	0	0	0	0	0	0	0	0	0	0	0
ENSG00000085840	ORC1	0	0	9	0	0	0	0	4	0	4	10	4	0	0	0	0	0	0	0	0	0	0	0	0	0	0	0	0	0	0	0	31	0	0	0	0	0	0
ENSG00000134748	PRPF38A	6	20	26	2	12	13	8	11	15	13	17	18	0	0	0	187	0	70	0	82	0	238	0	0	56	0	72	0	0	74	0	204	0	0	0	0	0	1
ENSG00000134744	ZCCHC11	38	57	45	64	19	93	12	0	4	21	12	5	0	0	50	83	106	0	0	0	52	0	2	19	0	1	17	0	60	39	0	0	0	0	0	1	0	0
ENSG00000236290	EEF1GP7	0	0	0	0	0	0	0	0	0	0	0	0	0	0	0	0	0	0	5	0	0	0	0	0	0	0	0	0	0	0	0	0	0	0	0	0	0	0
ENSG00000116157	GPX7	0	33	39	31	49	53	2	4	3	2	5	1	0	1	0	0	0	0	0	0	0	0	0	0	0	2	0	0	0	73	0	45	0	0	0	0	0	0
ENSG00000182183	FAM159A	0	0	0	1	0	0	2	0	1	0	2	0	0	0	0	12	1	0	0	0	0	0	1	0	0	0	0	0	0	19	15	0	0	0	0	0	0	0
ENSG00000162377	COA7	38	21	27	10	7	83	5	19	9	13	18	7	0	0	0	0	0	0	15	0	0	0	0	0	0	0	20	0	83	105	1	1	0	0	0	0	0	0
ENSG00000233664	NDUFS5P3	39	13	19	40	37	0	30	26	8	22	18	18	0	0	0	0	0	0	0	0	0	0	0	0	0	0	48	0	0	83	137	21	0	0	0	0	0	1
ENSG00000162378	ZYG11B	96	133	142	147	115	114	35	35	35	47	25	35	0	1	30	0	41	103	0	124	46	1	2	0	24	1	69	69	0	174	64	76	0	1	0	0	0	3
ENSG00000228929	RPS13P2	269	337	280	280	371	273	102	55	61	115	53	168	23	1	0	255	195	23	173	0	0	0	1	0	198	1	98	2	0	558	422	314	0	0	1	0	57	3
ENSG00000203995	ZYG11A	0	0	0	0	0	0	0	0	1	0	3	0	0	0	0	0	0	0	0	0	0	0	0	0	0	0	0	0	0	0	0	0	0	0	0	0	0	0
ENSG00000121310	ECHDC2	75	29	24	66	39	77	24	21	32	73	53	32	0	28	240	49	182	0	12	0	105	0	0	0	2	0	45	0	9	199	83	76	0	0	0	0	0	0
ENSG00000230953	AC099677.1	19	15	14	15	16	27	2	0	8	12	6	12	0	0	0	0	1	0	0	0	0	0	13	0	0	0	0	0	3	0	0	1	0	0	0	0	0	0
ENSG00000116171	SCP2	227	205	252	159	195	271	55	119	64	209	62	79	68	2	23	124	146	152	0	33	0	39	1	111	14	1	166	0	28	589	51	315	0	0	0	0	2	0
ENSG00000264834	MIR1273F	0	0	0	0	0	0	0	0	0	0	0	0	0	0	0	0	0	0	0	0	0	1	0	0	0	0	0	0	0	1	0	0	0	0	0	0	0	0
ENSG00000265815	MIR1273G	0	0	0	0	0	0	0	0	1	0	0	0	0	0	0	0	0	0	0	0	0	0	0	0	0	0	0	0	0	0	0	0	0	0	0	0	0	0
ENSG00000226147	TUBBP10	17	16	1	11	0	21	6	0	4	7	11	13	0	0	0	0	0	0	0	0	2	0	0	0	0	9	0	0	0	108	0	24	0	0	0	0	0	0
ENSG00000174348	PODN	411	256	215	200	273	266	10	0	0	30	0	11	0	116	206	501	145	209	65	88	1	140	4	0	0	2	135	0	9	69	85	2	0	1	0	0	0	2
ENSG00000227644	HIGD1AP11	0	0	0	0	0	0	0	0	0	0	0	0	0	0	0	0	0	0	0	0	0	0	0	0	0	0	0	0	0	13	0	0	0	0	0	0	0	0
ENSG00000162383	SLC1A7	0	0	0	0	0	7	0	0	0	0	0	0	0	0	0	0	0	0	0	0	0	0	0	0	0	0	0	0	0	0	0	0	0	0	0	0	0	0
ENSG00000235563	AL445183.2	0	0	7	0	0	0	0	0	0	0	0	0	0	0	0	0	0	0	0	0	0	0	0	0	0	0	0	0	0	0	0	0	0	0	0	0	0	0
ENSG00000157184	CPT2	53	67	65	75	41	96	28	3	20	22	14	28	0	0	65	0	0	1	0	0	0	80	0	0	0	0	0	67	0	43	0	0	0	0	0	0	0	0
ENSG00000162384	C1orf123	60	35	65	60	97	74	11	10	6	9	4	2	0	1	145	0	88	42	0	1	0	1	0	1	72	0	150	0	0	30	0	82	0	0	0	0	76	0
ENSG00000259818	AL606760.3	0	0	2	1	0	0	0	0	0	1	1	0	0	0	0	0	0	0	0	0	0	0	0	0	0	0	0	0	0	0	0	0	0	0	0	0	0	0
ENSG00000162385	MAGOH	28	31	65	73	74	11	19	16	20	60	30	35	45	0	10	13	0	0	0	0	0	0	1	0	0	1	37	0	112	89	0	74	1	0	0	0	0	0
ENSG00000226754	AL606760.1	0	0	0	1	0	0	0	0	1	0	0	0	0	0	0	0	0	0	0	0	0	0	0	0	0	0	0	0	0	8	0	0	0	0	0	0	0	0
ENSG00000157193	LRP8	9	17	11	15	0	0	34	28	41	71	25	45	0	0	25	78	0	0	0	0	0	0	0	0	44	58	12	0	4	151	0	112	0	0	0	0	0	1
ENSG00000230138	AC119428.2	7	0	0	0	0	0	0	0	0	2	0	0	0	0	0	0	0	0	0	0	0	0	0	0	0	0	0	0	0	28	0	0	0	0	0	0	0	0
ENSG00000174332	GLIS1	0	0	0	0	0	0	5	0	0	0	0	0	0	0	0	0	0	0	0	0	0	0	0	1	0	0	0	0	0	0	0	0	0	0	0	0	0	0
ENSG00000058804	NDC1	49	26	25	22	5	10	35	15	14	29	21	20	2	0	0	0	0	0	41	0	1	0	0	0	58	0	102	0	43	310	0	102	0	0	0	0	0	0
ENSG00000229687	AL049745.1	0	0	1	0	0	0	0	0	1	0	0	0	0	0	0	0	0	0	0	0	0	0	0	0	0	0	0	0	0	0	0	0	0	0	0	0	0	0
ENSG00000058799	YIPF1	31	20	19	48	61	74	34	39	23	66	23	26	1	2	0	70	61	0	61	5	0	0	1	0	0	0	4	0	13	257	15	0	0	0	0	0	0	0
ENSG00000211452	DIO1	0	0	0	0	0	0	0	0	1	3	0	0	0	0	0	0	0	0	0	0	0	0	0	0	0	0	0	0	0	0	0	0	0	0	0	0	0	0
ENSG00000081870	HSPB11	15	7	35	37	0	0	6	0	4	3	2	5	0	0	0	1	160	32	0	0	0	0	0	0	38	0	0	0	89	1	0	138	0	0	0	0	0	0
ENSG00000116212	LRRC42	73	45	31	85	7	22	31	19	22	34	31	16	0	0	0	0	0	0	0	0	72	0	0	0	0	0	17	0	52	113	60	0	0	0	0	0	0	0
ENSG00000219102	HNRNPA3P12	0	0	0	1	0	0	0	0	0	0	0	0	0	0	0	0	0	0	0	0	0	0	0	0	0	0	0	0	0	0	0	0	0	0	0	0	0	0
ENSG00000203985	LDLRAD1	0	0	0	0	0	0	2	0	4	0	0	4	0	0	0	0	0	0	0	0	0	0	0	0	0	0	0	0	0	0	0	0	0	0	0	0	0	0
ENSG00000116209	TMEM59	259	304	443	463	480	427	324	269	311	510	324	474	101	62	155	294	206	41	33	56	267	145	3	37	146	148	234	121	429	1512	187	718	1	1	0	2	3	3
ENSG00000116205	TCEANC2	0	30	28	10	19	35	4	6	7	5	2	13	0	0	0	0	33	0	0	0	0	15	0	0	34	0	0	0	0	0	0	0	0	1	0	0	0	0
ENSG00000225183	AL353898.1	11	8	19	5	5	0	5	12	14	3	3	4	0	0	0	0	0	0	0	0	0	0	0	0	0	0	0	0	0	44	0	0	0	0	0	0	0	0
ENSG00000215883	CYB5RL	0	19	0	0	0	0	4	7	0	6	0	2	286	0	0	0	0	0	20	1	0	0	0	0	0	0	0	0	0	1	0	1	0	0	0	0	0	0
ENSG00000116221	MRPL37	29	29	33	36	20	11	14	15	21	13	22	21	0	1	0	0	0	0	208	0	33	2	0	0	1	0	0	0	44	65	0	40	0	0	0	0	1	0
ENSG00000157216	SSBP3	90	43	57	61	62	36	32	31	35	35	27	26	25	0	13	90	0	0	29	0	124	0	0	0	38	1	87	0	109	170	0	13	0	1	0	1	87	0
ENSG00000198711	SSBP3-AS1	0	0	0	0	0	27	0	0	0	0	0	0	0	0	0	0	0	0	0	0	0	0	0	0	0	0	0	0	0	0	0	0	0	0	0	0	0	0
ENSG00000237173	AC099796.2	0	1	0	35	0	0	0	0	0	5	0	0	0	0	0	0	0	0	0	0	0	0	0	0	0	0	0	0	0	4	0	0	0	0	0	0	0	0
ENSG00000162390	ACOT11	5	26	8	12	1	14	3	0	0	9	1	3	0	0	0	0	0	0	0	0	27	0	0	0	0	0	0	0	0	1	0	0	0	0	0	0	0	0
ENSG00000243725	TTC4	0	0	0	0	0	0	0	0	0	4	0	0	0	0	0	0	0	0	0	0	0	0	0	0	0	0	0	0	0	38	0	0	0	0	0	0	0	0
ENSG00000162396	PARS2	0	0	15	1	0	0	2	1	3	5	0	5	0	0	0	0	0	0	0	0	0	0	0	0	0	0	0	0	0	0	0	0	0	0	0	0	0	0
ENSG00000006555	TTC22	0	0	4	0	0	17	2	0	3	11	2	3	0	0	0	0	45	0	0	0	0	0	0	0	0	0	0	0	0	29	0	1	0	0	0	0	0	0
ENSG00000116133	DHCR24	0	5	4	5	0	0	157	80	102	175	115	185	1	0	0	0	0	21	0	31	0	1	2	0	62	4	0	0	0	721	102	428	0	0	0	0	0	107
ENSG00000143001	TMEM61	0	0	0	0	0	0	6	0	0	2	7	7	0	0	0	0	0	0	0	0	0	0	0	0	0	0	0	0	1	0	0	8	0	0	0	0	0	0
ENSG00000169174	PCSK9	0	0	0	0	0	0	4	7	5	5	3	11	0	0	0	0	0	0	0	0	0	0	0	0	0	0	0	0	0	33	0	0	0	0	0	0	0	0
ENSG00000162402	USP24	51	34	23	4	1	65	26	4	15	26	25	17	0	20	0	92	0	34	24	0	0	57	1	0	0	44	71	0	78	57	0	49	0	0	0	0	0	0
ENSG00000260971	AC119674.1	0	0	0	6	0	0	0	0	1	0	1	0	0	0	0	0	0	0	0	0	0	0	0	0	24	0	0	0	0	0	0	0	0	0	0	0	0	0
ENSG00000162407	PLPP3	268	189	178	234	93	238	27	4	25	50	42	83	0	2	88	335	86	190	88	0	56	159	3	33	0	35	133	1	97	574	355	179	0	1	1	0	0	2
ENSG00000236776	RPL21P23	16	0	1	0	1	22	4	4	0	2	0	0	0	0	0	0	0	0	0	0	0	0	0	0	0	0	2	0	0	44	0	0	0	1	0	0	0	1
ENSG00000225475	AC099789.1	4	10	1	5	8	11	7	6	12	19	10	8	5	0	16	0	1	0	0	0	0	4	0	3	0	0	17	0	37	29	0	0	0	0	0	0	0	0
ENSG00000162409	PRKAA2	0	0	0	7	0	0	8	24	11	29	8	18	0	0	0	1	0	48	0	0	143	0	0	0	1	0	0	0	0	26	0	56	0	0	0	0	0	0
ENSG00000187889	FYB2	0	0	0	0	0	0	0	0	0	0	1	0	0	0	0	0	0	0	0	0	0	0	0	0	0	0	0	0	0	19	0	0	0	0	0	0	0	0
ENSG00000173406	DAB1	0	6	0	0	17	0	0	0	0	0	0	0	0	0	0	0	0	0	0	0	0	0	0	0	0	0	0	0	0	0	0	0	0	0	0	0	0	0
ENSG00000236888	RPS20P5	3	6	3	21	2	0	1	0	1	1	2	1	0	0	4	1	0	0	0	0	0	0	0	0	0	0	0	0	7	7	6	22	0	0	0	0	0	1
ENSG00000162600	OMA1	0	0	4	2	13	14	2	9	19	5	2	2	5	0	0	0	0	0	0	0	0	1	0	0	34	0	73	0	0	75	0	0	0	0	0	0	0	0
ENSG00000264128	RN7SL713P	0	0	0	1	0	0	0	0	0	0	0	0	0	0	0	0	0	0	0	0	0	0	0	0	0	0	0	0	0	0	0	0	0	0	0	0	0	0
ENSG00000184292	TACSTD2	2	2	7	8	24	1	490	390	477	526	569	506	0	85	0	0	0	0	1	0	0	0	165	83	20	160	54	1	272	2633	1	702	0	0	0	0	1	6
ENSG00000185839	AL035411.1	0	0	0	0	0	0	0	1	0	0	0	0	0	0	0	0	0	0	0	0	0	0	0	0	0	0	0	0	0	0	0	0	0	0	0	0	0	0
ENSG00000162601	MYSM1	44	95	63	97	75	44	30	13	33	45	30	32	1	0	112	38	100	19	0	126	0	0	1	14	1	2	94	45	42	108	0	469	0	0	0	2	0	1
ENSG00000283445	AL136985.3	0	0	0	0	0	0	2	0	0	0	4	0	0	0	0	0	0	0	0	0	0	0	0	0	0	0	0	0	0	52	0	0	0	0	0	0	0	0
ENSG00000177606	JUN	738	649	586	693	559	613	150	148	104	100	111	130	99	222	656	366	89	162	204	323	188	114	5	0	93	7	153	81	180	597	253	409	0	4	1	1	0	1
ENSG00000232453	AC105277.1	0	16	8	7	14	0	1	0	0	2	0	0	0	0	0	0	0	0	0	0	0	0	0	0	0	0	0	0	0	0	0	1	0	0	0	0	0	0
ENSG00000237352	LINC01358	0	7	0	0	10	1	0	0	0	0	0	0	0	0	5	0	0	0	0	0	0	0	0	0	0	0	0	0	0	0	0	0	0	0	0	0	0	0
ENSG00000228121	PHBP3	3	0	0	0	0	0	1	0	0	3	0	0	0	0	0	0	0	0	0	0	0	0	0	0	0	0	0	0	0	0	0	0	0	0	0	0	0	0
ENSG00000270457	AC093424.1	0	0	1	0	0	0	0	0	0	0	0	0	0	0	0	0	0	0	0	0	0	0	0	0	0	0	0	0	0	0	0	0	0	0	0	0	0	0
ENSG00000172456	FGGY	5	15	24	0	15	0	3	3	14	6	13	12	0	0	0	112	0	0	0	0	0	1	0	0	40	0	0	0	0	32	0	0	0	0	0	0	0	0
ENSG00000134709	HOOK1	4	1	4	3	0	0	28	30	38	53	27	42	0	1	0	0	0	0	1	0	0	0	0	0	92	0	0	0	0	161	0	153	0	0	0	0	0	0
ENSG00000134716	CYP2J2	0	0	0	0	0	0	0	7	2	18	2	9	0	0	0	0	0	0	0	0	0	0	0	0	0	0	0	0	0	7	0	5	0	0	0	0	0	0
ENSG00000226476	LINC01748	0	0	0	0	0	0	0	0	7	0	7	9	0	0	0	0	0	0	0	0	0	0	0	0	0	0	0	0	0	59	0	8	1	0	0	0	0	0
ENSG00000162599	NFIA	114	151	208	148	238	128	251	241	275	446	233	364	3	311	424	568	766	143	347	165	140	163	4	78	28	48	181	70	364	1608	34	1178	0	2	0	3	0	2
ENSG00000270742	AC096947.1	0	0	0	0	0	0	0	0	0	1	0	0	0	0	0	0	0	0	0	0	0	0	0	0	0	0	0	0	0	0	0	3	0	0	0	0	0	0
ENSG00000162604	TM2D1	97	127	95	103	84	39	41	46	36	64	39	42	0	0	0	0	2	2	0	116	2	148	2	0	45	0	117	0	11	155	0	147	0	0	12	0	0	1
ENSG00000271200	AC099791.2	6	9	0	0	0	0	0	10	0	0	0	0	0	0	0	0	0	0	0	0	0	0	0	0	0	0	9	0	0	27	0	0	0	0	0	0	0	0
ENSG00000132849	PATJ	15	0	0	16	32	0	47	18	38	47	38	36	0	2	0	2	0	0	0	0	0	0	0	0	0	0	0	0	13	232	0	0	0	0	0	0	0	1
ENSG00000236646	LAMTOR5P1	0	0	0	0	0	0	0	0	0	0	0	0	0	0	0	0	0	0	0	0	0	0	0	0	0	1	0	0	0	29	0	0	0	0	0	0	0	0
ENSG00000242860	RN7SL180P	0	0	0	0	0	0	0	0	1	0	0	0	0	0	0	0	0	0	1	0	0	0	0	0	0	0	0	0	0	0	0	0	0	0	0	0	0	0
ENSG00000240563	L1TD1	12	0	0	0	0	0	2	0	0	0	0	0	0	0	0	0	0	0	0	0	0	0	0	0	0	0	0	0	0	0	0	0	0	0	0	0	0	0
ENSG00000132854	KANK4	21	4	0	0	1	0	0	0	1	2	2	2	0	0	0	0	75	0	0	0	0	0	0	0	0	0	0	0	1	2	0	5	0	0	0	0	0	0
ENSG00000162607	USP1	30	72	58	35	59	48	39	26	41	56	42	23	0	0	0	1	78	0	0	0	62	0	0	0	0	1	10	10	14	87	42	150	0	0	0	0	0	0
ENSG00000116641	DOCK7	19	78	29	32	36	23	9	6	7	14	10	0	0	1	0	0	1	0	0	0	51	0	0	0	47	0	115	0	0	80	36	0	0	0	0	0	0	0
ENSG00000213703	AL138847.1	0	0	1	0	0	0	0	0	0	1	1	0	1	0	0	0	0	6	0	0	0	1	0	0	0	0	0	0	0	0	0	0	0	0	0	0	0	0
ENSG00000125703	ATG4C	117	60	43	30	23	66	9	1	1	13	6	11	0	0	0	0	0	21	0	0	0	0	0	0	0	3	0	0	220	1	0	73	0	0	0	0	0	0
ENSG00000224209	LINC00466	0	0	0	0	0	0	1	0	0	0	0	0	0	0	0	0	0	0	0	0	0	9	0	0	0	0	0	0	0	0	0	0	0	0	0	0	0	0
ENSG00000230798	FOXD3-AS1	0	0	0	0	0	0	4	9	1	0	0	0	0	0	0	0	0	0	0	0	0	0	0	0	0	0	0	0	0	30	0	0	0	0	0	0	0	0
ENSG00000236674	AL049636.1	5	3	1	0	0	0	0	0	0	3	0	0	0	0	0	0	0	0	0	0	0	0	0	0	0	0	1	0	0	0	0	0	0	0	0	0	0	0
ENSG00000088035	ALG6	30	0	1	8	24	49	24	1	18	36	11	14	0	0	0	0	0	12	0	3	10	0	0	0	0	1	0	0	89	0	66	143	0	0	0	0	0	0
ENSG00000142856	ITGB3BP	9	30	4	13	71	47	23	0	17	16	6	19	0	2	0	3	0	0	32	0	15	0	0	0	136	0	7	0	0	128	3	0	0	1	0	0	0	0
ENSG00000203965	EFCAB7	0	0	3	0	0	7	0	3	2	2	2	9	0	0	0	9	0	0	0	0	0	0	0	0	0	0	0	0	0	0	5	1	0	0	0	0	0	0
ENSG00000116652	DLEU2L	0	0	15	21	0	0	1	0	1	1	0	3	0	0	0	0	0	0	0	0	0	0	0	0	0	0	0	0	0	0	0	35	34	0	0	0	0	0
ENSG00000276884	DLEU2_6	0	0	0	0	0	0	0	0	0	0	0	0	0	0	0	0	0	0	0	0	1	0	0	0	0	0	0	0	0	0	0	0	0	0	0	0	0	0
ENSG00000079739	PGM1	51	53	46	61	102	27	22	16	28	67	35	28	1	4	122	163	35	10	30	0	0	111	0	26	60	0	60	0	0	240	0	87	0	0	0	0	0	0
ENSG00000244256	RN7SL130P	0	0	3	1	0	0	2	0	0	8	1	0	0	0	0	0	0	0	0	0	0	0	0	0	0	0	0	0	0	0	0	0	0	0	0	0	0	0
ENSG00000185483	ROR1	24	26	39	61	62	89	0	1	0	10	7	10	10	0	0	0	81	0	0	0	21	0	0	0	0	0	77	0	54	0	0	0	0	0	0	0	1	0
ENSG00000177452	AL161742.1	14	36	40	32	61	19	149	123	163	196	164	165	5	8	21	2	1	1	19	1	16	0	4	0	84	22	23	2	51	1011	57	511	0	0	0	0	0	0
ENSG00000223949	ROR1-AS1	0	0	0	0	0	0	0	0	0	0	0	0	0	0	0	0	0	0	0	0	0	0	0	0	0	2	0	0	1	0	0	0	0	0	0	0	0	0
ENSG00000158966	CACHD1	0	0	0	0	14	31	0	11	2	5	1	0	0	0	0	131	0	0	0	0	0	0	0	0	0	0	61	0	0	95	0	0	0	0	0	0	0	0
ENSG00000162437	RAVER2	4	12	0	8	7	0	0	3	0	0	0	0	0	0	0	0	0	0	0	0	0	0	0	0	0	0	0	0	0	0	0	0	0	0	0	0	0	0
ENSG00000162434	JAK1	229	222	212	227	177	150	52	30	44	54	43	73	27	29	221	3	334	0	58	24	40	114	0	43	120	1	193	0	43	373	354	291	0	1	0	0	0	2
ENSG00000234784	AL606517.2	0	1	0	0	0	2	0	0	0	2	1	0	0	1	0	0	0	2	0	0	0	0	0	0	0	0	0	0	0	0	0	0	0	0	0	0	0	0
ENSG00000233877	AL606517.1	7	0	3	1	15	0	0	0	0	0	0	3	0	0	0	0	0	0	0	0	0	0	0	0	0	0	0	0	0	0	0	0	0	0	0	0	0	0
ENSG00000226891	LINC01359	1	0	0	3	0	0	0	0	0	0	0	0	0	0	0	0	0	0	0	0	0	0	0	0	0	0	0	0	0	0	0	0	0	0	0	0	0	0
ENSG00000185031	SLC2A3P2	0	0	7	0	0	0	0	0	0	0	0	0	0	0	0	0	0	0	0	0	0	0	0	0	0	0	0	0	0	0	0	0	0	0	0	0	0	0
ENSG00000231485	AL357078.1	0	0	2	3	0	10	2	0	0	0	0	0	0	0	0	0	0	0	0	0	0	0	0	0	0	0	0	0	0	0	0	111	0	0	0	0	0	0
ENSG00000235804	AL357078.2	15	28	13	28	8	18	23	7	11	24	18	12	0	2	0	0	0	0	13	0	0	0	0	0	2	0	25	0	4	148	10	153	0	0	0	0	0	1
ENSG00000234496	MRPS21P1	0	0	0	6	0	0	2	0	0	0	0	0	0	0	0	0	0	0	0	0	0	0	0	0	0	0	13	0	0	0	0	0	0	0	0	0	0	0
ENSG00000162433	AK4	21	16	27	6	0	0	0	17	2	33	0	2	0	134	163	0	0	0	0	0	0	0	0	0	0	3	0	0	0	17	0	0	0	0	0	0	0	0
ENSG00000231622	RPS29P7	0	0	2	0	0	1	0	10	0	0	0	0	0	0	0	0	0	0	0	0	0	0	0	0	0	0	0	0	0	0	0	0	0	0	0	0	0	0
ENSG00000116675	DNAJC6	9	11	3	6	0	2	2	2	6	6	6	16	0	0	0	0	0	0	0	0	0	0	0	0	0	0	0	0	0	90	0	27	0	0	0	0	0	0
ENSG00000234144	COX6CP13	0	1	0	0	0	0	0	0	0	0	0	0	0	0	0	0	0	0	0	0	0	0	0	0	0	0	0	0	0	0	0	0	0	0	0	0	0	0
ENSG00000213625	LEPROT	167	324	199	195	195	246	106	49	85	178	60	92	215	2	480	364	258	103	201	2	0	64	1	1	82	66	327	0	182	548	261	300	0	2	0	0	0	1
ENSG00000116678	LEPR	27	14	19	12	11	14	1	0	2	4	1	4	0	1	26	427	81	43	35	122	174	108	4	1	0	89	26	0	150	42	120	86	0	0	0	0	0	1
ENSG00000237852	AC119800.1	0	0	0	0	0	0	0	0	0	0	0	0	0	0	0	0	0	0	0	18	0	0	1	0	0	0	0	0	0	0	0	0	0	0	0	0	0	0
ENSG00000184588	PDE4B	1	17	4	22	25	0	7	16	10	23	8	23	0	0	78	0	0	0	0	0	0	50	0	0	0	2	58	0	70	99	0	0	0	0	1	0	0	37
ENSG00000118473	SGIP1	17	17	2	17	9	0	6	0	0	4	0	9	0	11	0	0	0	0	0	0	0	0	0	0	0	0	0	0	0	16	0	0	0	0	0	0	0	0
ENSG00000152760	TCTEX1D1	0	0	0	9	7	0	0	0	0	0	0	0	0	0	0	0	0	0	0	0	0	0	0	0	0	0	0	0	0	0	0	0	0	0	0	0	0	0
ENSG00000152763	WDR78	0	0	0	2	0	0	0	18	1	20	6	14	0	0	0	0	0	0	0	0	0	0	0	0	0	0	0	55	0	41	0	0	0	0	0	0	0	0
ENSG00000198160	MIER1	139	165	140	96	39	44	35	26	15	36	22	58	2	0	0	0	123	0	68	48	0	0	0	0	0	1	20	0	96	300	31	146	0	0	1	0	0	1
ENSG00000116704	SLC35D1	23	28	11	14	5	16	15	13	15	27	11	16	0	0	133	5	0	0	0	0	0	0	0	1	0	0	0	0	0	0	0	125	0	0	0	0	0	0
ENSG00000252433	SNORA31	0	0	0	0	0	0	0	0	7	0	0	0	0	0	0	0	0	0	0	0	0	0	0	0	0	0	0	0	0	0	0	0	0	0	0	0	0	0
ENSG00000275678	AL133320.1	0	0	0	0	0	4	0	0	0	0	1	0	0	0	0	0	0	0	0	0	0	0	0	0	0	0	0	0	0	0	0	0	0	0	0	0	0	0
ENSG00000162594	IL23R	0	0	0	0	0	2	0	0	0	0	0	0	0	0	0	0	0	0	0	0	0	6	0	0	0	0	0	0	0	0	0	0	0	0	0	0	0	0
ENSG00000228523	AL389925.1	0	0	5	0	0	9	5	0	0	2	2	0	0	0	0	0	0	0	0	0	0	0	0	0	0	0	0	0	0	63	0	1	0	1	0	0	0	0
ENSG00000081985	IL12RB2	0	0	0	0	0	0	0	0	0	0	0	0	0	0	6	0	0	0	0	0	0	0	0	0	0	0	0	0	0	0	0	0	0	0	0	0	0	0
ENSG00000142864	SERBP1	166	272	228	220	136	172	149	92	120	147	145	121	298	2	32	59	78	39	46	3	169	0	0	19	53	55	370	4	183	407	99	482	1	0	0	0	0	1
ENSG00000116717	GADD45A	24	34	45	85	65	87	9	39	15	31	17	12	0	0	37	27	44	18	23	0	0	0	0	0	1	1	166	0	126	197	4	39	53	0	0	0	0	1
ENSG00000172380	GNG12	76	34	53	58	134	13	32	18	33	36	31	32	1	0	149	95	136	25	156	5	0	1	1	62	2	0	107	1	79	391	0	251	0	0	0	0	0	1
ENSG00000238778	RNU7-80P	0	0	2	0	0	0	0	0	0	0	0	0	0	0	0	0	0	0	0	0	0	0	0	0	0	0	0	0	0	0	0	0	0	0	0	0	0	0
ENSG00000232284	GNG12-AS1	0	0	0	0	8	0	0	0	0	0	0	1	0	0	0	0	0	0	0	0	0	0	0	0	0	0	0	0	0	0	0	0	0	0	0	0	0	0
ENSG00000235055	AL157407.1	0	0	0	3	0	6	0	0	0	0	0	0	0	0	0	0	0	0	0	0	0	0	0	0	0	0	0	0	0	0	0	0	0	0	0	0	0	0
ENSG00000162595	DIRAS3	0	0	0	6	0	0	3	9	0	13	3	4	1	0	0	0	0	0	0	0	0	0	0	0	40	0	0	0	0	0	7	0	0	0	0	0	0	0
ENSG00000116729	WLS	28	7	14	20	41	14	3	0	7	0	0	6	0	0	0	13	0	0	0	3	0	0	0	0	0	1	0	67	78	37	0	26	0	0	0	0	0	0
ENSG00000229133	RPS7P4	42	10	15	18	11	34	10	4	4	7	1	8	16	1	0	1	66	0	0	0	0	0	112	0	0	1	1	0	0	165	0	8	0	0	0	3	0	0
ENSG00000237622	ELOCP18	7	8	0	1	19	0	5	5	2	4	5	8	0	0	0	0	23	0	0	0	0	0	0	0	0	0	0	0	0	60	0	123	0	0	0	0	0	0
ENSG00000229440	AL139413.1	0	0	0	0	0	0	0	0	0	0	1	0	0	0	0	0	0	0	0	0	0	0	0	0	0	0	0	0	0	0	0	0	0	0	0	0	0	0
ENSG00000024526	DEPDC1	12	1	0	0	0	0	2	0	3	5	11	11	0	0	0	0	0	0	0	0	0	0	0	0	0	0	0	0	0	8	0	0	0	0	0	0	0	0
ENSG00000033122	LRRC7	0	0	0	0	0	0	5	2	7	21	4	2	0	0	0	1	0	0	0	0	0	0	0	0	0	0	0	0	0	26	0	0	0	0	0	0	0	0
ENSG00000229359	PIN1P1	7	4	4	13	29	25	3	7	7	6	8	7	0	0	0	1	0	0	0	0	46	0	0	0	11	0	0	0	0	65	0	2	0	0	0	0	0	0
ENSG00000066557	LRRC40	52	36	82	54	27	10	8	23	16	16	23	25	70	0	0	0	207	84	0	0	0	0	0	0	2	1	97	0	107	110	0	50	0	1	0	0	0	3
ENSG00000244389	RN7SL242P	0	0	0	0	0	0	0	0	0	0	2	6	0	0	0	0	0	0	0	0	0	0	0	0	0	0	0	0	0	0	0	0	0	0	0	0	0	0
ENSG00000116754	SRSF11	333	371	494	382	430	432	227	203	235	255	295	309	138	200	193	122	243	14	215	44	94	86	18	30	251	3	505	0	378	1714	85	889	2	2	10	2	1	5
ENSG00000118454	ANKRD13C	39	27	11	18	26	87	18	12	18	17	17	20	0	0	0	0	0	0	0	0	0	0	0	0	48	1	1	96	142	48	0	1	0	0	0	1	0	1
ENSG00000116761	CTH	0	0	0	0	0	0	0	0	0	0	1	3	0	0	0	0	0	0	0	0	0	0	0	0	0	0	0	0	0	0	0	0	0	0	0	0	0	0
ENSG00000278636	Metazoa_SRP	0	0	0	0	0	1	0	0	0	0	0	0	0	0	0	0	0	0	0	0	0	0	0	0	0	0	0	0	0	0	0	0	0	0	0	0	0	0
ENSG00000233020	AL354872.1	0	0	6	0	0	0	0	0	5	0	1	2	0	0	0	0	0	0	0	0	0	0	0	0	0	0	0	0	0	0	0	0	0	0	0	0	0	0
ENSG00000237033	CASP3P1	0	0	0	0	1	0	0	0	4	0	0	0	0	0	0	0	0	0	0	0	0	0	0	0	0	0	0	0	0	0	0	0	0	0	0	0	0	0
ENSG00000226208	AL513285.1	0	0	0	0	0	0	0	0	2	0	0	0	0	0	0	0	0	0	0	0	0	0	0	0	0	0	0	0	0	0	0	0	0	0	0	0	0	0
ENSG00000050628	PTGER3	26	33	26	44	70	20	7	3	0	0	2	0	0	0	2	0	188	0	0	0	0	0	0	0	0	0	120	1	0	0	0	0	0	0	0	0	0	1
ENSG00000235782	AL031429.1	0	0	0	21	0	36	0	0	0	0	0	0	0	0	0	0	0	0	0	0	0	0	0	0	0	0	0	0	0	0	0	0	0	0	0	0	0	0
ENSG00000269933	AL031429.2	0	2	0	4	0	0	0	0	0	0	0	0	0	0	0	0	0	0	0	0	0	0	0	0	0	0	0	0	0	0	0	0	0	0	0	0	0	0
ENSG00000132485	ZRANB2	220	143	200	237	175	212	77	61	102	187	95	116	108	3	165	209	178	0	34	0	20	41	3	0	194	3	167	6	49	805	177	392	1	0	0	1	1	2
ENSG00000229956	ZRANB2-AS2	4	0	7	0	0	0	1	4	1	2	0	0	0	0	0	0	0	0	0	0	0	0	0	0	0	0	0	0	0	0	0	0	0	0	0	0	0	0
ENSG00000172260	NEGR1	70	114	99	50	47	84	0	1	4	10	1	17	29	0	10	70	87	1	0	1	0	0	0	0	0	0	0	0	1	81	0	0	0	1	0	0	0	0
ENSG00000233994	GDI2P2	0	0	1	0	0	0	0	0	0	0	0	0	0	0	0	0	0	0	0	0	0	0	0	0	0	0	0	0	0	0	0	0	0	0	0	0	0	0
ENSG00000227207	RPL31P12	628	559	796	785	680	861	243	231	231	388	244	235	75	116	353	249	438	1	234	51	19	76	2	0	447	289	821	55	871	1207	543	549	0	1	9	0	0	5
ENSG00000225087	AL583808.1	0	0	0	0	0	0	0	0	2	0	0	0	0	0	0	0	0	0	0	0	0	0	0	0	0	0	0	0	0	0	0	0	0	0	0	0	0	0
ENSG00000162620	LRRIQ3	0	3	0	0	0	0	0	0	0	0	1	3	227	0	0	0	2	0	0	0	0	0	0	0	0	0	0	0	0	0	0	0	0	0	0	0	0	0
ENSG00000254685	FPGT	17	16	16	8	20	8	7	13	17	2	3	8	0	0	0	0	0	0	0	0	0	0	0	0	94	0	0	0	85	0	3	88	0	1	0	0	0	0
ENSG00000259030	FPGT-TNNI3K	0	6	7	3	0	0	0	0	1	0	0	0	0	0	6	9	0	0	0	0	0	0	0	0	0	0	0	0	0	0	0	0	0	0	0	0	0	0
ENSG00000178965	ERICH3	4	0	0	1	0	0	0	0	0	3	0	0	0	0	0	0	0	0	0	0	0	0	0	0	0	0	0	0	0	0	0	0	0	0	0	0	0	0
ENSG00000116791	CRYZ	41	47	14	19	9	27	27	38	37	41	24	20	0	0	0	0	4	0	0	0	0	0	0	22	1	16	5	0	94	11	0	1	0	0	0	0	1	0
ENSG00000162623	TYW3	39	31	39	20	38	11	31	16	14	37	15	5	0	1	0	43	0	0	0	0	59	0	2	0	0	0	69	0	41	144	41	44	0	0	0	0	0	0
ENSG00000229943	AC133865.1	0	0	0	0	0	0	0	7	0	0	0	0	0	0	0	0	0	0	0	0	0	0	0	0	0	0	0	0	0	0	0	0	0	0	0	0	0	0
ENSG00000261213	AC099786.3	0	0	0	0	0	0	0	0	0	0	1	4	0	0	0	0	0	0	0	0	0	0	0	0	0	0	0	0	0	0	0	0	0	0	0	0	0	0
ENSG00000162624	LHX8	0	0	0	1	0	0	60	92	94	68	104	88	0	1	0	0	0	0	0	0	0	0	0	32	0	0	0	0	0	268	0	208	0	1	0	0	0	0
ENSG00000224149	AC099786.2	0	0	0	0	0	0	0	0	0	0	2	0	0	0	0	0	0	0	0	0	0	0	0	0	0	0	0	0	0	0	0	0	0	0	0	0	0	0
ENSG00000137968	SLC44A5	0	0	0	0	0	0	0	2	1	2	0	5	0	0	0	0	0	0	0	0	0	0	0	0	0	0	0	0	0	0	0	0	0	0	0	0	0	0
ENSG00000213579	AL096829.1	0	12	0	0	11	0	0	0	0	1	0	0	89	0	0	0	1	19	0	135	0	0	2	0	0	0	2	0	11	22	0	0	0	1	0	0	0	0
ENSG00000117054	ACADM	82	87	74	101	109	76	33	42	25	61	27	33	43	1	59	19	33	0	0	0	47	0	0	0	2	2	144	0	170	141	35	338	1	0	0	0	0	0
ENSG00000137955	RABGGTB	62	46	38	38	31	47	22	17	39	52	27	44	0	0	0	0	0	0	28	0	0	0	0	0	81	4	104	1	101	41	115	2	0	0	0	7	0	0
ENSG00000184005	ST6GALNAC3	0	2	0	0	0	0	0	0	0	0	1	0	0	0	0	0	0	0	0	0	0	0	0	0	0	0	0	0	0	0	0	0	0	0	0	0	0	0
ENSG00000117069	ST6GALNAC5	0	15	6	0	0	0	0	5	3	16	13	2	0	0	0	0	0	0	0	0	0	0	0	0	0	0	0	0	0	0	0	0	0	0	0	0	0	0
ENSG00000142892	PIGK	47	63	66	36	30	45	40	14	20	31	15	49	0	0	26	56	0	17	50	30	0	0	1	0	96	2	11	0	52	112	1	2	0	0	0	0	1	0
ENSG00000226084	AC113935.1	0	0	0	1	6	0	0	0	0	0	0	0	0	0	0	0	0	0	0	0	0	0	0	0	0	0	0	0	2	1	0	0	0	0	0	0	0	0
ENSG00000228187	AC093433.1	20	16	3	0	0	0	0	0	0	3	0	0	0	0	0	0	0	0	0	0	0	0	0	0	0	0	0	0	0	0	0	0	0	0	0	0	0	0
ENSG00000154027	AK5	0	14	0	0	0	0	0	0	0	0	0	6	0	0	0	0	15	0	0	0	0	0	0	0	0	0	0	0	22	0	0	1	0	0	0	0	0	0
ENSG00000036549	ZZZ3	140	94	98	165	101	153	40	17	39	64	30	40	0	0	27	47	102	46	0	0	1	22	1	0	1	1	59	0	249	95	50	30	0	1	0	0	0	0
ENSG00000251785	RNA5SP20	0	0	0	0	0	0	0	0	0	0	3	0	0	0	0	0	0	0	0	0	0	0	0	0	0	0	0	0	0	0	0	0	0	0	0	0	0	0
ENSG00000077254	USP33	64	85	54	54	32	57	22	2	36	28	35	20	0	86	34	197	45	47	29	46	0	0	3	31	0	2	75	1	232	131	0	82	0	1	0	0	0	1
ENSG00000180488	MIGA1	44	5	26	46	41	26	44	44	71	38	47	70	1	5	14	38	53	0	0	2	157	0	0	0	0	2	41	0	18	413	0	12	0	0	0	0	1	1
ENSG00000219201	AC138392.1	0	0	2	0	3	13	0	0	0	4	1	2	0	0	0	0	0	0	0	0	0	0	0	0	0	0	0	0	0	0	0	0	0	0	0	0	0	0
ENSG00000235613	NSRP1P1	61	120	141	139	169	140	120	111	162	190	203	217	44	7	55	130	105	141	0	1	1	0	178	57	41	0	262	0	151	952	59	396	0	0	1	0	0	3
ENSG00000235927	NEXN-AS1	0	0	3	0	0	0	0	0	0	5	0	0	0	0	0	0	0	0	0	0	0	0	0	0	0	0	0	0	0	0	0	0	0	0	0	0	0	0
ENSG00000162614	NEXN	30	28	41	37	22	91	25	9	26	16	5	14	109	1	172	14	8	0	32	0	0	109	1	0	0	2	1	0	97	84	0	241	0	0	0	0	0	1
ENSG00000162613	FUBP1	136	149	212	216	79	173	86	38	87	133	90	78	0	21	0	0	121	0	0	0	1	49	24	0	44	2	155	1	200	504	0	345	0	0	0	0	0	1
ENSG00000162616	DNAJB4	8	69	18	8	1	29	4	11	5	8	2	7	0	1	120	0	205	0	0	0	0	0	0	0	0	0	0	0	0	21	0	0	0	0	0	1	0	1
ENSG00000137960	GIPC2	26	1	7	4	12	0	0	0	0	0	0	0	0	1	0	5	125	0	74	0	0	0	0	0	0	0	1	0	0	0	0	0	0	0	0	0	0	1
ENSG00000273338	AC103591.3	4	27	3	6	38	1	6	10	11	5	0	7	33	0	0	0	0	0	0	0	0	0	1	2	86	0	105	0	10	66	0	0	0	0	0	0	0	1
ENSG00000213561	AC103591.2	0	0	0	0	3	0	0	0	2	3	0	0	0	0	0	0	0	0	0	0	0	0	0	0	0	0	0	0	0	0	0	0	0	0	0	0	0	0
ENSG00000213560	AC103591.1	0	0	1	5	0	0	0	3	0	0	0	10	0	0	0	0	0	0	0	0	0	0	0	0	0	0	0	0	0	31	0	0	0	0	0	0	0	0
ENSG00000202263	RNA5SP22	0	0	0	1	0	0	0	0	0	0	0	0	0	0	0	0	0	0	0	0	0	0	0	0	0	0	0	0	0	0	0	0	0	0	0	0	0	0
ENSG00000237413	MGC27382	1	4	0	0	0	2	0	0	0	0	0	3	0	0	0	0	0	0	0	0	0	0	0	0	0	0	0	0	20	5	0	0	0	0	0	0	0	0
ENSG00000122420	PTGFR	52	60	31	39	36	43	0	0	0	0	0	0	1	1	10	42	50	0	0	0	0	50	0	18	0	0	0	0	0	60	0	0	0	0	0	0	0	0
ENSG00000137959	IFI44L	166	172	215	246	95	121	87	61	66	140	45	99	190	54	101	224	162	30	53	151	18	1	1	0	43	0	137	0	2	298	3	320	1	0	0	0	0	2
ENSG00000137965	IFI44	155	189	182	278	117	224	105	58	144	165	68	57	85	2	295	23	77	0	88	149	84	1	2	24	167	24	53	102	270	251	26	173	1	0	0	0	0	0
ENSG00000238015	AC104837.2	0	0	1	0	0	2	0	2	1	0	2	5	0	0	1	0	2	0	0	0	3	0	0	0	0	1	3	0	0	24	3	8	0	0	0	0	0	0
ENSG00000235400	AC104837.1	1	3	5	12	1	5	0	1	3	4	3	4	0	0	0	39	0	0	0	0	0	0	0	0	34	11	30	0	0	23	0	10	0	0	0	0	0	0
ENSG00000162618	ADGRL4	47	82	92	58	113	64	3	0	9	11	8	21	2	95	163	58	116	105	131	0	43	0	2	183	0	1	176	26	1	190	0	108	0	1	0	0	0	1
ENSG00000232676	ADH5P2	0	0	0	0	0	0	0	0	2	0	0	0	0	0	0	0	0	0	0	0	0	0	0	0	0	0	0	0	0	0	0	0	0	0	0	0	0	0
ENSG00000235756	AC098657.1	0	0	0	0	2	0	0	0	0	0	0	0	0	0	0	0	0	0	0	0	0	0	0	0	0	0	0	0	0	1	0	0	0	0	0	0	0	0
ENSG00000225598	AL606519.1	0	0	0	0	0	0	0	0	0	5	0	0	0	0	0	0	0	0	0	0	0	0	0	0	0	0	0	0	0	0	0	0	0	0	0	0	0	0
ENSG00000234184	LINC01781	0	0	5	1	0	0	0	0	1	5	0	0	1	0	0	0	0	0	0	0	0	0	0	36	0	0	0	0	0	0	0	0	0	0	0	0	0	0
ENSG00000235089	AL357632.1	79	174	103	135	134	94	100	104	115	161	90	128	3	2	73	85	45	44	58	0	27	0	2	18	92	54	72	0	214	919	0	416	1	0	0	0	0	51
ENSG00000117114	ADGRL2	18	23	7	17	52	41	4	5	9	4	3	14	68	0	44	1	0	0	87	0	0	0	0	0	0	1	0	0	39	0	0	0	0	0	0	0	0	0
ENSG00000234683	AL138799.3	3	0	10	2	1	3	0	4	0	0	1	0	23	0	1	0	0	1	0	1	0	0	0	0	2	1	0	11	1	3	0	6	0	0	0	0	0	0
ENSG00000215875	ST13P20	0	0	0	0	0	0	0	0	0	0	1	7	0	0	0	1	0	0	0	2	0	1	0	0	0	0	1	0	0	1	0	0	0	0	0	0	0	0
ENSG00000236268	LINC01361	0	0	0	1	0	0	2	0	0	0	0	0	0	0	0	0	0	0	0	0	0	0	0	0	0	0	0	0	0	0	0	18	0	0	0	0	0	0
ENSG00000233008	LINC01725	0	0	0	1	0	0	0	0	0	0	0	0	0	0	0	0	0	0	0	0	0	0	0	0	0	0	0	0	0	0	0	0	0	0	0	0	0	0
ENSG00000137941	TTLL7	0	0	5	7	31	0	5	26	9	13	18	10	0	0	0	8	0	0	0	1	0	0	0	0	1	34	0	0	0	121	0	0	0	0	0	0	0	0
ENSG00000271576	AL359504.2	1	6	0	3	0	0	0	0	0	0	3	5	0	0	4	147	0	0	0	0	0	0	1	0	0	0	0	0	0	0	0	0	0	0	0	0	0	0
ENSG00000142875	PRKACB	113	62	80	116	68	115	26	22	32	56	28	18	0	41	0	95	13	0	62	122	76	0	1	0	146	3	173	79	1	138	4	1	0	0	0	0	0	0
ENSG00000213540	AL359504.1	0	0	0	0	26	0	0	0	0	0	0	1	0	0	0	0	0	0	0	0	0	0	0	0	0	0	0	0	0	0	0	0	0	0	0	0	0	0
ENSG00000199959	SNORA2	0	0	2	0	0	0	1	11	0	0	0	0	0	0	0	0	0	0	0	0	0	0	0	0	0	0	0	0	0	0	0	0	0	0	0	0	0	0
ENSG00000203943	SAMD13	0	0	0	0	0	0	0	0	0	7	0	1	0	0	0	0	0	0	0	0	0	0	0	0	0	0	0	0	0	0	0	2	0	0	0	0	0	0
ENSG00000240520	UOX	0	0	0	20	0	0	0	6	0	7	0	4	0	0	0	0	0	0	0	0	0	0	0	0	0	0	0	0	0	0	0	1	0	0	0	0	0	0
ENSG00000137976	DNASE2B	8	21	20	26	17	0	0	0	0	0	0	0	0	0	0	0	0	0	0	0	0	0	0	0	0	0	45	0	0	65	0	113	0	1	0	0	0	2
ENSG00000117133	RPF1	36	14	49	23	60	83	29	35	28	53	26	38	1	2	0	0	43	0	0	0	0	1	0	1	51	1	102	0	0	209	43	77	61	1	0	0	0	1
ENSG00000174021	GNG5	40	33	38	56	72	47	21	22	28	29	15	25	0	27	0	40	0	0	0	0	0	1	0	21	91	51	43	0	0	149	47	38	0	0	0	0	0	0
ENSG00000122432	SPATA1	0	1	0	5	0	22	0	0	4	1	1	0	0	1	0	0	0	0	0	90	0	0	1	13	0	0	0	0	0	0	0	0	0	0	0	0	0	0
ENSG00000117151	CTBS	84	101	24	76	47	107	11	6	12	42	2	9	0	0	236	18	0	1	25	0	0	0	0	0	55	1	0	0	51	51	0	101	2	0	0	1	0	1
ENSG00000117155	SSX2IP	35	6	28	0	1	7	13	15	24	16	12	9	0	0	0	0	0	0	0	0	0	0	0	0	105	24	0	0	0	91	0	0	0	0	0	0	0	0
ENSG00000171517	LPAR3	0	0	5	6	0	0	1	6	7	3	4	12	0	0	0	0	0	0	0	0	0	0	0	0	0	0	0	0	0	11	0	90	0	1	0	0	0	0
ENSG00000153898	MCOLN2	32	41	44	36	33	37	4	13	0	23	1	11	0	0	0	0	0	0	0	0	0	0	0	0	15	0	8	0	0	70	35	0	0	0	0	0	0	0
ENSG00000162643	WDR63	0	1	0	0	0	0	0	0	0	0	0	0	0	0	0	0	0	0	0	0	11	0	0	0	0	0	0	0	0	0	0	0	0	0	0	0	0	0
ENSG00000055732	MCOLN3	67	60	22	29	14	14	8	11	0	0	1	5	0	0	0	0	0	0	0	0	0	198	0	0	132	0	0	0	0	1	18	90	0	0	0	0	0	0
ENSG00000280099	AL603750.1	0	1	0	0	0	0	7	20	15	13	6	25	0	1	0	0	0	0	0	0	0	0	0	0	0	0	0	0	0	229	0	155	0	0	0	0	0	0
ENSG00000097096	SYDE2	0	0	4	0	0	0	0	5	16	17	8	9	0	0	0	0	0	0	0	0	0	0	0	0	14	0	0	0	0	72	0	62	0	0	0	0	0	0
ENSG00000162642	C1orf52	63	53	54	30	1	28	7	30	11	20	13	1	2	1	45	0	39	1	0	0	0	0	0	14	0	7	2	0	2	109	44	112	0	0	0	0	0	0
ENSG00000142867	BCL10	30	66	33	25	26	47	14	11	28	10	15	16	15	0	39	0	0	24	16	0	0	0	0	1	0	3	54	0	1	117	0	1	0	0	0	0	0	1
ENSG00000223653	AL078459.1	1	0	0	1	2	0	3	0	0	3	1	0	0	0	0	0	0	0	0	0	0	0	0	0	0	0	0	0	0	0	0	13	0	0	0	0	0	0
ENSG00000153904	DDAH1	4	5	2	19	0	0	18	14	43	51	29	66	1	2	0	0	0	0	0	0	0	0	0	0	11	67	0	0	24	249	0	199	0	0	1	0	0	0
ENSG00000282057	AC092807.3	0	0	3	2	12	0	0	0	1	1	2	0	0	0	0	0	0	0	1	0	0	0	0	0	0	0	0	1	0	0	74	0	0	0	0	0	0	0
ENSG00000272691	AC092807.2	0	0	9	0	0	0	0	2	4	4	0	0	1	0	0	0	0	0	0	0	0	0	0	1	0	0	0	0	50	0	0	0	0	0	0	0	0	0
ENSG00000142871	CYR61	2044	2476	1923	2214	2208	2425	129	101	87	238	47	150	1274	607	783	654	936	84	1159	169	110	348	3	84	130	7	374	80	558	1034	476	361	1	6	0	1	2	7
ENSG00000199934	SNORD81	31	26	27	25	14	54	30	19	23	11	24	19	0	0	25	4	0	0	7	12	0	0	1	5	9	0	24	0	13	12	66	8	0	0	0	0	0	1
ENSG00000117174	ZNHIT6	30	52	30	53	79	15	48	44	29	38	28	45	24	1	39	0	188	0	0	0	0	0	0	16	0	83	3	0	16	265	68	97	0	0	0	0	1	0
ENSG00000171502	COL24A1	17	7	6	10	2	0	0	0	4	3	0	0	0	0	0	0	0	0	0	0	0	0	0	0	0	1	0	0	136	0	0	1	0	0	0	0	0	1
ENSG00000201620	RNA5SP51	1	0	0	0	0	0	0	0	0	0	0	0	0	0	0	0	0	0	0	0	0	0	0	0	0	0	0	0	0	0	0	0	0	0	0	0	0	0
ENSG00000122417	ODF2L	10	14	7	26	25	49	16	20	43	25	10	31	0	0	0	115	0	112	0	62	0	0	1	0	40	0	1	0	146	55	0	1	0	0	0	0	0	0
ENSG00000137975	CLCA2	7	3	1	7	12	0	44	108	66	288	81	155	2	1	0	0	0	0	0	0	0	0	0	0	5	0	3	0	17	502	0	85	0	0	0	0	0	1
ENSG00000153923	CLCA3P	0	0	0	0	0	0	0	0	0	0	0	0	0	0	0	0	0	0	0	0	0	0	0	0	0	0	0	0	0	3	0	0	0	0	0	0	0	0
ENSG00000261737	AL049597.2	0	24	7	0	0	8	0	0	5	1	4	0	0	0	51	0	0	0	0	0	1	0	0	0	0	0	18	0	0	26	0	0	0	0	0	0	0	0
ENSG00000097033	SH3GLB1	241	110	98	50	75	66	70	15	38	68	40	46	0	21	195	100	281	0	1	93	1	0	2	54	0	1	131	82	53	271	4	216	1	0	0	1	0	1
ENSG00000230721	AL049597.1	11	7	9	12	4	10	3	1	3	6	3	2	0	3	1	4	22	1	3	2	0	1	1	1	0	5	10	0	16	25	3	15	0	0	0	0	0	1
ENSG00000183291	SELENOF	259	250	283	203	263	240	121	54	143	222	147	147	89	72	184	192	199	144	235	11	27	3	2	35	2	42	94	24	60	723	176	238	2	0	1	2	0	1
ENSG00000153936	HS2ST1	78	86	76	76	141	61	21	35	27	17	35	47	108	63	1	275	0	136	0	14	58	7	2	0	4	1	30	0	8	177	0	26	0	0	0	0	0	0
ENSG00000235251	AC093155.2	0	0	0	0	0	0	5	4	0	0	1	0	0	0	0	0	0	0	0	0	0	0	0	0	0	0	0	0	0	0	0	0	0	0	0	0	0	0
ENSG00000267272	LINC01140	0	0	9	0	0	0	0	0	0	0	0	0	0	0	0	0	0	0	67	0	0	0	0	0	0	0	0	0	0	0	0	0	0	0	0	0	0	0
ENSG00000143013	LMO4	388	335	272	265	412	446	105	85	93	207	140	145	53	17	113	184	294	219	117	44	38	29	1	42	109	8	217	33	215	548	5	704	0	1	74	0	1	2
ENSG00000065243	PKN2	15	56	123	70	22	71	40	11	30	51	22	30	1	3	0	0	143	0	0	0	0	0	0	10	26	0	62	0	217	170	3	233	0	0	0	0	0	1
ENSG00000241975	ELOCP19	6	0	1	0	0	0	0	0	0	0	0	0	0	0	0	0	0	0	0	0	0	0	0	0	0	0	0	0	0	0	0	0	0	0	0	0	0	0
ENSG00000137947	GTF2B	11	42	14	21	24	24	18	16	6	35	9	23	0	1	229	1	0	0	0	0	0	0	0	0	0	0	106	0	0	119	0	1	0	0	0	0	0	0
ENSG00000137944	KYAT3	14	6	29	26	0	18	9	12	10	2	13	17	0	1	0	0	0	0	1	0	0	0	0	0	0	0	1	0	0	27	0	0	0	0	0	0	0	0
ENSG00000213516	RBMXL1	18	64	78	72	58	26	45	37	19	37	28	44	0	0	10	29	17	0	44	29	1	0	23	0	62	1	113	0	0	452	1	186	0	1	0	0	65	0
ENSG00000117226	GBP3	34	86	38	43	21	27	38	27	26	66	22	54	1	0	1	0	0	0	35	0	0	0	0	57	36	0	28	0	0	68	63	246	0	0	0	0	0	0
ENSG00000117228	GBP1	84	88	121	130	140	146	62	50	45	190	48	51	0	11	104	2	0	90	0	0	2	0	0	0	59	1	211	0	0	281	92	224	0	1	0	0	0	1
ENSG00000234518	PTGES3P1	0	7	35	25	0	0	3	8	22	10	29	0	0	0	0	104	0	0	0	0	0	0	0	0	0	0	0	0	0	19	0	42	0	0	0	0	0	0
ENSG00000162645	GBP2	73	167	88	78	146	79	75	122	87	251	108	117	0	31	50	100	8	1	67	0	20	1	125	0	159	1	139	0	77	480	90	350	2	0	0	0	0	0
ENSG00000162654	GBP4	24	50	45	35	17	12	16	34	8	101	2	17	0	0	0	18	62	0	0	0	0	0	0	1	0	0	63	0	0	7	7	81	0	0	0	0	0	0
ENSG00000154451	GBP5	13	41	31	32	26	39	0	7	1	9	6	3	1	1	0	0	0	1	0	0	0	304	0	0	1	0	90	0	5	66	0	82	0	0	0	0	0	3
ENSG00000183347	GBP6	0	0	0	0	0	0	0	0	0	0	2	4	0	0	0	0	0	0	0	0	0	0	0	0	0	0	0	0	0	0	0	0	0	0	0	0	0	0
ENSG00000225492	GBP1P1	81	79	68	52	39	46	27	14	15	78	31	36	0	3	26	60	0	0	0	0	0	0	0	0	20	0	91	0	0	171	0	0	0	1	0	0	0	0
ENSG00000197147	LRRC8B	1	19	26	14	40	7	24	13	12	26	9	18	113	1	31	8	0	0	0	0	0	0	6	0	5	0	0	0	1	116	0	0	0	0	0	0	0	0
ENSG00000230735	AC093423.2	0	0	0	0	0	0	1	0	0	0	0	1	0	0	0	0	0	0	0	0	0	0	0	0	0	0	0	0	0	4	0	0	0	0	0	0	0	0
ENSG00000171488	LRRC8C	46	21	55	44	54	85	1	1	6	3	0	8	0	0	2	30	40	59	139	0	0	0	0	0	1	0	45	0	1	37	0	8	0	0	0	0	0	0
ENSG00000231613	AC099568.1	0	0	0	0	0	0	0	0	2	0	0	0	0	28	0	0	0	0	0	0	0	0	0	0	0	0	0	0	0	0	0	0	0	0	0	0	0	0
ENSG00000272931	AC099568.2	7	15	0	0	0	0	0	0	2	1	0	2	0	0	0	0	0	0	0	0	0	0	0	0	0	0	0	0	0	0	0	0	0	0	0	0	0	0
ENSG00000171492	LRRC8D	73	39	24	60	32	44	9	10	22	21	12	33	0	1	9	46	0	74	0	0	18	0	1	0	1	1	42	0	42	76	0	73	0	0	0	0	0	0
ENSG00000228175	GEMIN8P4	0	0	0	3	0	0	0	0	2	0	0	0	0	0	0	0	0	0	0	0	0	0	0	0	0	0	0	0	0	0	0	0	0	0	0	0	0	0
ENSG00000162664	ZNF326	20	43	19	40	8	30	18	17	17	20	21	27	2	16	79	0	22	0	0	0	0	0	0	33	41	0	6	0	0	38	47	225	0	0	0	0	0	0
ENSG00000199666	SNORD3G	0	0	0	0	0	0	0	0	0	3	0	1	0	0	12	0	0	0	0	0	0	0	0	0	0	0	0	0	0	0	0	0	0	0	0	0	0	0
ENSG00000233593	AL590094.1	48	0	0	1	0	0	0	0	1	7	1	0	0	0	0	0	0	0	0	0	0	0	1	0	0	0	0	0	0	0	0	1	0	0	0	0	0	0
ENSG00000122482	ZNF644	62	23	53	107	71	27	50	34	41	81	66	69	1	1	114	0	39	34	0	163	0	0	14	0	46	52	80	1	84	389	109	245	0	1	1	0	0	1
ENSG00000215873	FEN1P1	0	0	0	0	0	0	0	0	0	0	0	0	0	0	0	0	0	0	0	0	0	0	0	0	0	0	0	0	0	0	6	0	0	0	0	0	0	0
ENSG00000097046	CDC7	22	0	0	0	22	29	3	2	8	11	8	0	0	0	0	0	0	0	0	0	0	0	0	0	0	0	85	0	0	81	0	0	0	0	0	0	0	0
ENSG00000203914	HSP90B3P	51	70	59	54	27	23	61	47	65	70	90	115	3	42	0	7	3	36	0	2	1	0	0	0	27	0	112	0	45	166	1	144	0	0	0	0	0	2
ENSG00000069702	TGFBR3	26	24	51	27	36	60	3	0	3	6	0	0	0	138	61	182	2	53	190	226	0	1	1	0	3	0	46	0	138	5	1	0	0	0	0	0	0	1
ENSG00000137948	BRDT	0	0	0	0	0	0	0	0	0	0	0	0	0	0	0	0	0	0	0	0	0	0	0	0	0	0	0	0	0	0	0	1	0	0	0	0	0	0
ENSG00000172031	EPHX4	0	0	0	0	0	0	0	0	0	1	0	0	0	0	0	0	0	0	0	0	0	0	0	0	0	0	0	0	0	0	0	0	0	0	0	0	0	0
ENSG00000230667	SETSIP	1	6	12	14	0	14	5	1	10	9	6	4	0	0	48	0	0	0	0	0	5	0	0	0	6	0	0	0	0	44	33	0	0	0	0	0	0	0
ENSG00000284413	BTBD8	0	0	0	8	13	0	0	0	0	0	0	0	0	0	0	0	0	0	0	0	0	0	0	0	0	0	0	0	0	0	0	0	0	0	0	0	0	0
ENSG00000233401	PRKAR1AP1	0	0	0	0	0	0	1	0	0	0	0	0	0	0	0	0	0	0	0	0	0	0	0	0	0	0	0	0	0	0	0	0	0	0	0	0	0	0
ENSG00000273487	AC104836.2	0	1	0	3	0	0	0	14	0	4	0	0	0	0	0	0	0	0	0	0	0	0	0	0	0	0	0	0	0	0	0	0	0	0	0	0	0	0
ENSG00000233125	ACTBP12	2	0	0	0	0	0	0	0	0	0	0	0	0	0	0	0	0	0	0	0	0	0	0	0	0	0	0	0	0	1	0	0	0	0	0	0	0	0
ENSG00000174842	GLMN	32	39	20	7	27	4	16	3	16	24	17	11	0	0	0	0	0	0	0	0	0	0	0	0	0	0	1	0	0	124	0	0	0	0	0	0	0	0
ENSG00000122484	RPAP2	0	30	42	53	19	33	25	12	12	40	23	15	1	2	0	0	0	1	19	0	6	1	0	0	0	1	12	21	23	132	0	3	0	0	0	0	0	1
ENSG00000162676	GFI1	10	37	14	17	57	0	1	0	0	0	0	0	0	0	0	0	0	0	0	0	0	0	0	0	0	0	0	1	0	32	289	0	0	0	0	0	0	0
ENSG00000067208	EVI5	48	73	33	27	3	32	23	15	14	31	9	13	0	0	251	99	24	130	0	0	10	0	0	0	0	1	19	0	58	82	0	0	0	0	0	2	0	1
ENSG00000229992	HMGB3P9	0	0	0	4	0	0	0	0	0	0	0	0	0	0	0	0	0	0	0	0	0	0	0	0	0	0	0	0	0	0	0	0	0	0	0	0	0	0
ENSG00000225505	AC104332.1	0	0	0	0	0	0	0	0	1	0	0	0	0	0	0	0	0	0	0	0	0	0	0	0	0	0	0	0	0	0	0	0	0	0	0	0	0	0
ENSG00000122406	RPL5	23	53	61	78	31	110	36	23	21	52	36	27	1	0	17	26	21	0	60	0	1	7	8	0	18	2	38	2	51	215	3	116	1	0	0	0	0	6
ENSG00000154511	FAM69A	0	0	29	3	0	0	0	0	0	1	2	0	0	0	0	0	0	0	0	0	0	0	0	0	0	0	0	0	0	0	0	0	0	0	0	0	0	0
ENSG00000207022	SNORA51	0	1	0	0	0	0	0	0	0	0	0	0	0	0	0	0	0	0	0	0	0	0	0	0	0	0	0	0	0	0	0	0	0	0	0	0	0	0
ENSG00000229052	AL449283.1	0	0	0	1	0	0	0	0	0	5	0	0	0	0	0	0	0	0	0	0	0	0	0	0	0	0	0	0	0	0	0	0	0	0	0	0	0	0
ENSG00000143033	MTF2	23	82	60	88	47	43	30	16	42	53	38	49	2	2	0	30	194	0	136	0	0	1	0	0	0	0	36	0	49	251	0	56	1	0	0	0	0	0
ENSG00000117500	TMED5	248	155	138	173	168	134	51	102	81	134	84	92	0	40	87	131	70	13	1	161	48	55	3	44	192	76	197	50	200	574	176	184	1	0	0	0	1	0
ENSG00000122483	CCDC18	0	1	1	40	5	0	0	0	0	0	4	10	0	0	0	0	0	0	0	0	0	0	0	0	59	0	89	0	26	0	0	0	0	0	0	0	0	0
ENSG00000237003	AC126124.2	0	0	0	0	0	0	0	0	0	1	0	0	0	0	0	0	0	0	0	0	0	0	0	0	0	0	0	0	0	0	0	0	0	0	0	0	0	0
ENSG00000223745	CCDC18-AS1	68	127	140	118	83	91	29	27	23	70	21	36	9	0	76	98	92	1	11	109	0	0	0	19	108	0	46	2	108	160	118	36	0	1	0	0	0	1
ENSG00000229567	AL139421.1	1	1	0	0	1	1	0	0	0	0	1	0	0	0	1	0	0	0	1	0	1	0	0	0	0	0	1	0	3	0	0	0	0	0	0	0	0	1
ENSG00000117505	DR1	100	114	121	122	125	88	33	72	61	85	45	61	2	35	5	81	0	0	13	1	0	1	2	11	0	2	61	0	149	430	0	254	0	2	0	0	0	0
ENSG00000137942	FNBP1L	39	24	46	43	64	22	34	65	88	120	116	111	0	108	0	1	0	1	118	66	2	28	0	0	41	4	1	0	139	596	0	476	0	1	0	1	1	1
ENSG00000137936	BCAR3	25	11	20	85	45	20	14	15	16	17	12	18	0	76	0	0	0	0	0	0	0	0	0	0	6	1	37	0	0	15	1	0	0	0	0	0	1	0
ENSG00000260464	AL049796.1	0	0	0	0	0	21	0	0	0	0	0	0	0	0	0	0	0	0	0	0	0	0	0	0	0	0	0	0	1	0	0	0	0	0	0	0	0	0
ENSG00000067334	DNTTIP2	13	7	52	92	18	14	28	11	33	23	31	44	0	1	0	56	0	0	0	4	0	31	0	0	0	1	50	0	0	164	0	1	0	0	0	0	0	0
ENSG00000023909	GCLM	29	53	10	107	58	35	28	39	28	56	50	39	0	0	93	95	0	0	15	0	0	0	2	0	0	0	61	0	1	79	67	103	0	0	0	0	0	1
ENSG00000198691	ABCA4	0	1	0	0	0	0	1	0	12	0	11	4	0	0	0	0	0	0	0	0	0	0	0	0	0	0	0	0	0	149	0	62	0	0	0	0	0	0
ENSG00000137962	ARHGAP29	20	30	46	14	59	19	101	111	104	138	143	118	72	27	274	32	53	117	5	35	1	1	0	36	157	54	152	0	70	921	125	733	0	1	0	0	0	2
ENSG00000264963	RN7SL440P	5	11	0	15	0	0	3	6	0	3	1	1	0	0	0	0	0	0	0	0	0	0	0	0	0	0	16	0	1	34	0	17	0	0	0	0	15	0
ENSG00000117528	ABCD3	36	17	13	26	51	0	89	88	74	93	74	52	0	1	0	16	72	24	0	0	236	0	1	0	61	44	0	38	104	400	0	327	0	0	1	0	0	0
ENSG00000117525	F3	293	370	273	342	216	313	67	53	42	110	63	80	576	2	55	0	74	63	195	45	0	1	0	26	34	47	61	76	39	385	13	146	0	0	0	0	0	0
ENSG00000223675	AC093117.1	0	0	0	0	2	0	0	0	0	0	0	1	0	0	0	0	0	0	0	0	0	0	0	0	0	0	0	0	0	0	0	0	0	0	0	0	0	0
ENSG00000224081	SLC44A3-AS1	4	4	2	0	0	12	3	3	10	6	3	15	0	0	0	0	0	0	0	0	0	0	0	0	0	0	6	0	0	17	0	0	0	0	0	0	0	0
ENSG00000143036	SLC44A3	4	4	0	0	0	0	5	0	3	3	7	12	0	0	0	0	0	0	0	0	0	0	0	0	0	1	0	0	0	0	0	0	0	0	0	0	0	0
ENSG00000117519	CNN3	233	193	267	175	282	180	163	167	175	206	136	198	228	4	263	327	147	0	521	0	236	2	3	0	176	25	184	29	326	1032	111	239	0	0	0	0	0	1
ENSG00000235501	AC105942.1	1	0	0	0	0	0	1	9	0	1	0	5	0	0	0	42	0	0	0	0	0	0	0	0	0	0	0	0	0	0	16	8	0	0	0	0	0	0
ENSG00000172339	ALG14	36	10	30	18	30	8	20	41	22	10	33	30	1	0	34	35	0	28	0	0	0	0	0	0	32	0	0	0	219	86	0	176	0	0	0	0	0	0
ENSG00000152078	TMEM56	12	8	3	3	18	22	9	24	22	24	11	18	0	0	0	0	78	0	0	0	0	0	0	0	146	1	0	0	0	95	1	1	0	0	0	0	0	0
ENSG00000225923	AC092393.1	0	0	0	0	0	0	0	0	0	1	0	0	0	0	0	0	0	0	0	0	0	0	0	0	0	0	0	0	0	0	0	0	0	0	0	0	0	0
ENSG00000228502	EEF1A1P11	5	2	3	4	3	0	1	1	1	3	1	2	2	0	0	1	10	8	4	0	0	0	0	0	1	0	13	0	1	0	0	9	2	0	0	0	0	0
ENSG00000234226	NDUFS5P2	38	6	19	30	5	78	19	5	44	2	11	22	0	0	0	0	0	0	0	0	0	0	0	0	0	0	0	115	0	18	0	93	0	0	0	0	0	0
ENSG00000137970	RPL7P9	217	229	250	358	310	398	164	145	196	238	196	247	96	35	91	99	177	64	63	56	27	2	1	46	277	90	260	2	232	1624	131	369	1	4	0	0	4	4
ENSG00000117569	PTBP2	56	7	2	13	9	11	3	13	11	24	10	12	0	0	2	0	0	0	38	0	0	1	0	0	47	1	38	1	0	27	83	114	0	0	0	0	0	0
ENSG00000188641	DPYD	42	103	75	147	70	128	9	9	18	28	9	8	0	0	0	4	0	84	0	31	0	0	1	35	19	80	1	0	21	163	0	0	0	0	1	0	0	0
ENSG00000228057	SEC63P1	86	111	95	68	164	73	51	50	95	165	131	104	0	44	120	108	123	0	134	0	0	42	1	0	16	1	74	68	0	511	58	142	0	0	0	0	1	1
ENSG00000226128	RPL26P9	1	2	0	1	3	3	0	0	0	1	0	1	0	0	2	0	0	0	0	0	0	0	0	0	0	0	0	0	0	0	0	0	0	0	0	0	0	0
ENSG00000225206	MIR137HG	0	0	0	0	0	0	0	0	0	0	0	0	0	0	0	0	0	0	0	0	0	0	0	0	0	0	4	0	0	0	0	0	0	0	0	0	0	0
ENSG00000162627	SNX7	80	56	28	37	35	63	23	2	9	20	5	8	0	0	0	0	0	0	55	34	0	0	0	30	0	1	1	0	0	73	0	0	0	0	0	0	0	0
ENSG00000117598	PLPPR5	0	1	0	0	0	0	0	0	0	4	0	0	0	0	0	0	0	22	0	0	0	0	0	0	0	0	0	0	0	16	0	53	0	0	0	0	0	0
ENSG00000227034	AL445433.1	59	15	44	33	77	81	20	23	25	8	18	20	33	1	0	8	18	12	135	0	0	0	0	0	29	0	40	6	53	124	16	74	0	0	0	0	0	1
ENSG00000117600	PLPPR4	39	8	0	10	16	0	4	0	7	2	0	10	0	0	0	1	1	0	0	0	0	0	0	0	0	0	0	0	0	0	0	0	0	0	0	0	0	0
ENSG00000224445	LINC01708	0	0	0	0	0	0	0	0	0	0	0	0	0	0	0	0	0	0	0	0	0	0	0	0	0	0	0	0	0	0	1	0	0	0	0	0	0	0
ENSG00000099260	PALMD	52	18	46	43	156	105	30	42	34	35	27	36	262	1	218	0	10	33	0	0	1	0	0	9	1	0	95	25	27	176	78	259	0	0	0	0	0	1
ENSG00000223656	HMGB3P10	0	0	0	0	0	0	0	1	0	0	0	0	0	0	0	0	0	0	0	0	0	0	0	0	0	0	0	0	0	0	0	0	0	0	0	0	0	0
ENSG00000156869	FRRS1	0	0	0	0	0	0	0	0	0	0	1	0	0	0	0	0	0	0	0	0	0	0	0	0	0	0	0	0	0	0	0	0	0	0	0	0	0	0
ENSG00000201491	RNU4-75P	0	0	0	0	0	0	0	0	0	0	0	0	0	0	0	0	0	0	0	0	0	0	0	0	0	0	0	0	0	0	0	2	0	0	0	0	0	0
ENSG00000202254	Y_RNA	0	0	0	0	0	0	0	0	0	0	1	0	0	0	0	0	0	0	0	0	0	0	0	0	0	0	0	0	0	0	0	0	0	0	0	0	0	0
ENSG00000162688	AGL	36	50	49	43	35	63	16	36	21	22	25	20	104	0	0	0	68	89	64	1	0	2	1	0	30	1	13	0	2	104	117	0	0	0	0	0	1	0
ENSG00000117620	SLC35A3	53	28	47	41	166	46	116	59	94	148	111	73	2	0	3	20	116	0	0	0	0	0	0	1	99	2	53	30	39	437	5	70	0	1	1	0	0	0
ENSG00000283761	AC118553.2	0	0	2	0	0	0	0	0	1	0	0	0	0	0	0	0	0	0	0	0	0	0	0	0	0	0	0	0	0	0	0	0	0	0	0	0	0	0
ENSG00000156876	SASS6	0	6	9	24	0	19	7	19	14	5	17	11	0	0	0	0	0	0	0	0	0	0	0	0	0	83	0	0	27	394	0	0	0	0	0	0	0	1
ENSG00000122435	TRMT13	39	22	20	24	89	37	14	7	8	31	10	5	0	0	178	0	0	0	0	0	0	0	0	0	0	3	38	1	168	98	0	65	0	43	0	0	0	0
ENSG00000122477	LRRC39	14	3	7	20	0	6	0	0	0	0	0	0	1	0	0	0	0	0	0	0	0	0	0	0	0	0	33	0	0	0	0	0	0	0	0	0	0	0
ENSG00000137992	DBT	55	29	37	47	21	81	19	14	36	29	19	25	0	1	0	1	0	0	1	0	0	0	0	0	0	0	64	2	0	40	171	82	0	0	0	0	0	0
ENSG00000225169	BRI3P1	0	0	5	5	0	0	0	0	0	0	0	0	0	0	0	0	0	0	0	0	0	0	0	0	0	0	0	0	0	0	0	0	0	0	0	0	0	0
ENSG00000230287	AL445928.1	0	0	0	0	0	0	0	0	0	0	0	0	0	0	0	0	0	0	0	0	0	0	0	0	0	0	0	0	0	1	0	0	0	0	0	0	0	0
ENSG00000224616	RTCA-AS1	0	0	0	0	0	0	6	0	0	7	3	0	0	0	0	0	174	0	0	0	0	0	0	0	0	0	0	0	0	0	0	0	0	0	0	0	0	0
ENSG00000137996	RTCA	22	38	39	90	98	46	41	34	53	60	53	29	0	3	61	53	0	0	0	0	0	0	0	41	14	2	97	0	0	565	20	303	0	0	0	0	0	1
ENSG00000079335	CDC14A	12	12	0	23	1	0	6	13	0	11	1	2	0	0	0	0	0	0	0	0	0	0	0	0	1	0	0	0	0	16	0	26	0	0	0	0	0	0
ENSG00000234332	BCAS2P2	0	0	0	0	0	3	0	0	0	0	0	0	0	0	0	0	0	0	0	0	0	0	0	0	0	0	0	0	0	0	0	0	0	0	0	0	0	0
ENSG00000181656	GPR88	1	0	13	0	0	3	0	0	0	0	0	0	0	0	0	0	0	0	0	0	0	0	0	0	0	0	0	0	0	0	0	0	0	0	0	0	0	0
ENSG00000162692	VCAM1	72	91	53	138	163	70	4	12	3	21	4	6	0	0	0	133	0	29	56	0	0	0	1	57	94	0	190	19	321	89	117	17	0	1	0	0	0	0
ENSG00000162694	EXTL2	48	13	27	40	43	0	16	12	9	28	24	10	0	0	201	0	111	145	20	0	0	0	0	0	50	0	13	0	0	125	32	1	0	0	0	0	0	1
ENSG00000273204	AC104506.1	0	5	0	0	0	0	2	2	0	0	2	6	0	0	0	0	0	0	0	0	0	0	0	0	0	0	0	0	1	15	0	0	0	0	0	0	0	0
ENSG00000162695	SLC30A7	92	123	136	102	107	131	89	87	95	118	86	88	110	2	13	184	39	0	0	36	0	0	0	0	75	0	46	34	58	531	26	274	0	0	0	0	0	0
ENSG00000117543	DPH5	17	16	17	24	20	21	12	17	8	11	35	18	92	0	84	54	0	4	0	0	0	0	1	0	28	2	78	0	1	95	0	30	0	0	0	35	0	0
ENSG00000233184	AC093157.1	0	3	0	14	0	26	1	4	2	15	1	3	0	0	0	0	0	0	0	0	0	0	0	0	0	0	0	0	0	31	0	0	0	0	0	0	0	1
ENSG00000252765	SCARNA16	0	0	0	0	0	0	0	0	0	0	1	0	0	0	0	0	0	0	0	0	0	0	0	0	0	0	0	0	0	0	0	0	0	0	0	0	0	0
ENSG00000170989	S1PR1	29	30	22	14	24	115	0	4	1	0	2	2	0	3	101	90	30	40	26	104	0	45	1	19	113	0	187	0	0	98	63	109	0	0	0	1	0	1
ENSG00000260940	AL109741.3	0	0	0	0	1	0	0	0	0	0	0	1	0	0	0	0	0	0	0	0	62	0	0	0	0	0	0	0	0	0	0	0	0	0	0	0	0	0
ENSG00000228399	AL109741.2	3	15	20	37	12	4	9	11	4	3	2	7	1	0	44	29	7	0	15	6	0	0	1	0	5	0	11	0	66	60	1	24	0	0	0	0	0	0
ENSG00000183298	RPSAP19	1	9	10	20	6	2	1	0	5	4	3	27	0	0	0	28	0	1	19	0	0	0	0	0	0	0	1	0	0	34	0	11	0	0	5	0	0	0
ENSG00000118733	OLFM3	0	0	0	0	0	0	0	0	0	2	0	0	0	0	0	0	0	0	0	0	0	0	0	0	0	0	0	0	0	0	0	0	0	0	0	0	0	0
ENSG00000060718	COL11A1	110	71	94	99	40	93	63	11	19	55	10	39	0	0	0	0	57	0	0	0	0	0	0	0	0	1	0	0	1	84	70	132	1	0	0	0	0	0
ENSG00000224613	AC095032.1	0	0	0	0	0	0	0	0	0	0	0	0	0	0	0	0	1	0	0	0	0	0	0	0	0	0	0	0	0	0	0	0	0	0	0	0	0	0
ENSG00000185946	RNPC3	27	43	33	44	13	47	13	18	18	23	43	12	2	0	108	124	0	23	0	1	77	0	0	0	2	1	141	28	81	161	3	163	0	0	0	0	0	0
ENSG00000240038	AMY2B	2	1	12	7	8	3	0	8	2	4	2	1	0	0	2	0	0	1	0	1	1	0	0	0	0	2	2	0	4	6	0	3	0	0	0	0	0	0
ENSG00000174876	AMY1B	0	0	0	0	0	0	0	0	0	0	0	0	0	0	0	0	0	0	0	0	0	0	0	0	0	0	0	0	0	0	0	1	0	0	0	0	0	0
ENSG00000187733	AMY1C	0	0	0	0	0	0	0	1	0	0	0	0	0	0	0	0	0	0	0	0	0	0	0	0	0	0	0	0	0	0	0	0	0	0	0	0	0	0
ENSG00000215869	AC092506.1	0	0	5	0	0	0	0	0	0	0	1	0	0	0	0	0	0	0	0	0	0	0	0	0	0	0	0	0	0	20	0	0	0	0	0	0	0	0
ENSG00000228347	FTLP17	338	306	276	268	156	208	4	2	3	4	1	2	98	11	36	53	77	2	49	29	58	5	0	0	0	0	57	0	36	26	0	42	1	1	1	0	0	1
ENSG00000230768	LINC01676	0	0	0	0	0	0	0	0	0	0	2	0	0	0	0	0	0	0	0	0	0	0	0	0	0	0	0	0	0	0	0	0	0	0	0	0	0	0
ENSG00000227850	SEPT2P1	0	0	0	0	0	0	0	0	0	0	1	0	0	0	0	0	0	0	0	0	0	0	0	0	0	0	0	0	0	0	0	0	0	0	0	0	0	0
ENSG00000237897	AL512844.2	15	32	37	26	64	15	31	11	17	20	32	16	0	0	47	0	51	0	0	0	0	0	0	0	0	0	91	0	36	249	35	97	0	0	0	0	0	0
ENSG00000232952	AL512844.1	0	17	9	15	2	13	4	13	3	6	8	9	0	0	0	0	0	0	0	0	0	0	0	0	0	0	0	65	0	17	0	1	0	0	0	0	0	0
ENSG00000233449	MTATP6P14	0	0	0	0	0	0	0	0	0	0	0	0	0	0	0	0	0	0	0	0	0	0	0	0	0	0	0	0	0	1	0	0	0	0	0	0	0	0
ENSG00000232551	MTCO1P14	0	1	1	0	0	0	0	0	1	0	0	2	0	0	0	0	0	0	0	0	0	0	0	0	0	0	0	0	0	7	0	0	0	0	0	0	0	0
ENSG00000198890	PRMT6	58	19	8	17	15	38	7	20	20	19	21	16	0	0	0	26	0	0	0	0	0	0	0	0	0	0	0	0	0	0	0	1	0	0	0	0	0	0
ENSG00000224550	AC114491.1	11	24	58	48	17	21	27	7	19	49	9	18	0	102	1	0	201	218	0	0	1	2	0	0	307	0	17	0	0	131	1	0	0	0	0	0	1	0
ENSG00000134215	VAV3	0	14	23	8	2	0	32	33	25	72	22	20	0	0	0	0	0	0	50	0	112	0	130	0	0	0	0	0	207	6	0	17	0	0	1	0	0	0
ENSG00000230489	VAV3-AS1	0	0	2	0	0	0	3	0	0	0	3	0	0	0	0	0	0	0	0	0	0	0	0	0	0	0	0	0	0	0	0	0	0	0	0	0	0	0
ENSG00000226822	AL390036.1	1	0	8	13	9	0	0	0	0	0	0	0	0	0	43	0	0	0	0	0	0	0	0	0	0	0	0	0	0	10	0	0	0	0	0	0	0	0
ENSG00000085491	SLC25A24	134	99	86	93	129	100	78	52	59	109	111	91	0	1	117	68	62	0	23	0	40	0	43	0	45	0	155	0	0	687	0	266	0	1	0	1	2	1
ENSG00000280186	AL359258.3	0	0	0	0	0	0	0	5	0	0	0	0	0	0	0	0	0	0	0	0	0	0	0	0	0	0	0	0	0	0	0	0	0	0	0	0	0	0
ENSG00000241361	SLC25A24P1	0	0	0	0	0	0	0	0	0	0	0	0	0	0	0	0	0	0	0	0	0	0	0	0	0	0	1	0	0	0	0	0	0	0	0	0	0	0
ENSG00000243967	NBPF5P	0	0	0	0	0	0	0	0	1	0	0	0	0	0	0	0	0	0	0	0	0	0	0	0	0	0	0	0	0	0	0	0	0	0	0	0	0	0
ENSG00000224698	AL390038.1	0	1	0	0	0	0	0	0	0	0	0	0	0	0	0	0	0	0	0	0	0	0	0	0	0	0	0	0	0	0	0	0	0	0	0	0	0	0
ENSG00000186086	NBPF6	0	0	0	0	0	0	0	0	0	0	0	0	0	0	0	0	1	0	0	0	0	0	0	0	0	0	0	0	0	0	0	0	0	0	0	0	0	0
ENSG00000162636	FAM102B	50	29	13	34	13	26	8	6	13	20	27	11	0	1	13	91	0	37	0	54	276	0	0	0	2	0	8	0	0	56	281	21	0	0	0	0	0	2
ENSG00000162639	HENMT1	0	14	12	24	0	9	31	27	25	25	13	9	0	1	0	0	0	0	0	86	0	0	0	0	0	0	0	0	0	93	0	0	0	0	21	0	0	0
ENSG00000134186	PRPF38B	78	164	244	189	295	127	81	27	45	105	80	66	146	2	241	53	0	0	0	0	0	0	0	4	51	3	129	0	90	491	95	186	0	1	33	0	0	3
ENSG00000116266	STXBP3	96	96	46	90	61	66	37	5	27	34	20	25	1	0	14	0	0	49	35	0	11	0	46	0	123	138	67	0	91	181	79	42	0	1	0	0	1	0
ENSG00000162641	AKNAD1	0	0	0	0	0	0	0	3	0	0	1	0	0	0	0	0	0	0	0	0	0	0	0	0	0	0	0	0	0	62	0	0	0	0	0	0	0	0
ENSG00000203897	SPATA42	0	0	0	0	0	0	0	5	0	0	0	0	0	0	0	0	0	0	0	0	0	0	0	0	0	0	0	0	0	0	0	0	0	0	0	0	0	0
ENSG00000121957	GPSM2	10	4	37	5	61	0	26	11	33	23	19	8	0	0	0	0	49	0	0	0	26	0	0	0	0	0	0	0	0	116	15	168	0	0	0	0	0	0
ENSG00000121940	CLCC1	51	22	46	41	60	40	19	35	35	49	28	41	0	2	0	0	0	0	0	0	0	0	0	0	41	1	0	0	210	105	0	88	0	0	0	0	0	0
ENSG00000085433	WDR47	32	17	24	11	48	21	13	1	20	9	9	31	0	0	112	11	0	93	1	0	0	0	44	0	0	0	0	0	61	33	0	0	0	0	0	0	0	0
ENSG00000237349	BX679664.2	0	13	1	6	0	0	1	0	0	0	4	8	0	0	2	0	0	0	0	0	0	0	0	0	0	85	0	0	0	3	0	0	0	0	0	0	0	0
ENSG00000244716	BX679664.3	18	29	27	29	23	21	14	11	9	7	11	9	1	146	57	99	9	1	8	6	1	2	0	0	7	5	4	0	16	58	12	20	0	0	0	0	1	0
ENSG00000228665	BX679664.1	16	43	24	21	59	28	8	12	13	2	14	1	8	2	0	5	0	1	0	0	0	0	0	0	5	14	67	0	1	98	0	184	0	0	0	0	0	6
ENSG00000228054	RANP5	0	0	0	0	0	0	0	0	0	3	0	0	0	0	0	0	0	0	0	0	0	0	0	0	0	0	0	0	0	0	0	0	0	0	0	0	0	0
ENSG00000197780	TAF13	53	121	82	82	87	85	102	74	91	133	96	138	0	2	136	115	72	18	0	0	0	8	1	0	0	0	66	36	28	431	0	105	1	1	0	0	0	0
ENSG00000273382	AL356488.3	0	1	3	0	0	0	11	0	6	4	1	1	0	0	0	0	0	0	0	208	2	0	2	0	0	0	0	0	0	1	0	3	0	0	0	0	0	0
ENSG00000215717	TMEM167B	245	107	75	85	139	107	48	71	53	62	62	80	0	1	0	284	89	114	37	1	42	0	1	24	0	2	43	0	21	369	26	194	0	1	0	0	1	0
ENSG00000116299	KIAA1324	0	3	0	1	8	33	154	123	140	269	132	175	1	2	0	0	0	0	0	0	0	0	0	0	124	52	0	0	71	852	0	139	0	1	0	0	0	3
ENSG00000031698	SARS	40	124	59	117	117	74	66	58	53	71	90	66	0	2	38	81	4	5	8	87	1	0	3	0	0	3	147	0	50	196	54	97	1	0	0	0	0	0
ENSG00000143126	CELSR2	0	4	0	2	0	0	22	26	22	8	39	24	0	1	40	0	0	0	19	0	0	0	0	0	28	0	0	0	0	39	0	0	1	0	0	0	0	0
ENSG00000134222	PSRC1	0	0	16	8	0	0	5	0	8	6	6	5	0	0	0	0	0	0	0	0	0	0	0	1	0	0	0	0	0	124	0	0	0	0	0	0	0	0
ENSG00000221986	MYBPHL	0	0	0	0	0	0	0	0	0	0	0	2	0	0	0	0	0	0	0	0	0	0	0	0	0	0	0	0	0	0	0	0	0	0	0	0	0	0
ENSG00000134243	SORT1	147	129	176	123	125	99	91	93	93	118	132	114	0	2	0	54	193	0	0	0	0	0	0	0	0	12	54	53	189	546	28	403	0	2	0	0	0	2
ENSG00000143106	PSMA5	122	115	77	36	62	19	64	67	60	104	85	82	4	84	48	3	0	3	1	0	0	0	7	0	106	2	13	0	219	515	43	351	1	1	0	0	0	1
ENSG00000143028	SYPL2	0	2	0	0	0	0	0	0	0	0	0	0	0	0	0	0	0	0	0	0	0	0	0	0	0	0	0	0	0	0	0	0	0	0	0	0	0	0
ENSG00000162650	ATXN7L2	0	0	0	0	0	0	2	0	0	0	0	0	0	0	0	0	0	0	0	0	0	0	0	0	0	0	0	0	0	13	0	0	0	0	0	0	0	0
ENSG00000174151	CYB561D1	9	10	3	26	39	0	7	6	15	27	13	12	0	1	1	0	0	0	0	0	0	0	0	0	0	258	0	0	121	162	0	81	0	0	0	0	0	0
ENSG00000181754	AMIGO1	0	0	0	0	0	0	16	0	6	6	5	0	0	0	36	1	0	0	0	0	0	0	0	0	0	0	0	0	0	0	0	0	0	0	0	0	0	0
ENSG00000065135	GNAI3	134	93	62	115	27	202	48	47	50	57	65	68	1	1	0	230	0	0	0	0	111	0	0	96	1	79	53	0	121	204	2	386	0	0	0	0	0	0
ENSG00000116337	AMPD2	53	89	74	48	55	17	31	29	35	58	36	36	1	0	0	0	0	0	0	0	9	0	0	36	0	0	33	0	115	1	0	215	36	1	1	1	0	0
ENSG00000235045	RPL7P8	12	18	34	40	10	17	26	10	12	29	26	19	20	6	0	74	93	0	17	1	1	1	1	2	74	2	61	0	51	150	0	62	1	0	0	0	2	0
ENSG00000168765	GSTM4	11	5	7	4	0	0	7	5	14	12	2	2	0	0	0	0	0	13	0	1	0	0	0	0	0	24	13	0	0	5	0	0	0	0	0	0	0	0
ENSG00000213366	GSTM2	0	0	1	4	0	0	3	0	1	3	0	0	0	0	0	0	0	0	0	0	0	0	0	0	0	0	0	0	0	10	0	0	0	0	0	0	0	0
ENSG00000134184	GSTM1	26	23	14	44	34	8	13	5	7	22	10	27	0	0	1	22	0	0	0	0	0	7	2	0	0	1	113	11	152	48	0	196	0	0	0	0	0	0
ENSG00000134201	GSTM5	0	0	0	7	0	0	0	0	0	0	0	0	0	0	0	0	0	0	0	0	43	0	0	0	1	0	0	0	0	0	0	0	14	0	0	0	0	0
ENSG00000241720	AL158847.1	0	0	0	0	0	0	0	0	0	1	0	0	0	0	0	0	0	0	0	0	0	0	0	0	0	0	0	0	0	19	0	0	0	0	0	0	0	0
ENSG00000134202	GSTM3	14	8	3	8	0	18	92	97	119	215	65	124	0	1	0	0	0	0	0	1	0	0	0	0	0	48	12	43	118	180	0	321	0	1	0	0	0	1
ENSG00000184371	CSF1	75	99	72	105	120	67	4	8	3	23	8	14	0	52	186	0	255	0	0	0	47	0	0	0	0	2	121	0	32	92	59	1	0	0	0	0	0	2
ENSG00000168710	AHCYL1	301	196	265	378	488	353	175	192	208	345	209	225	242	86	180	91	147	0	1	119	110	41	4	7	242	117	605	24	231	1619	2	915	2	1	1	0	0	5
ENSG00000143093	STRIP1	0	0	4	0	0	4	1	1	0	0	3	3	0	0	0	0	0	0	0	0	0	0	0	0	0	0	0	0	21	0	0	47	0	0	0	0	0	0
ENSG00000258634	AL160006.1	0	0	7	0	0	0	0	10	0	5	7	3	0	0	0	0	0	0	0	0	0	0	0	0	0	0	0	0	0	2	0	0	0	0	0	0	0	0
ENSG00000156150	ALX3	0	0	0	0	0	0	1	0	0	0	0	0	0	0	0	0	0	0	0	0	0	0	0	0	0	0	0	0	0	0	0	0	0	0	0	0	0	0
ENSG00000197106	SLC6A17	0	0	0	0	0	0	4	6	3	0	5	0	0	0	0	0	0	0	0	0	0	1	0	0	50	0	0	0	0	7	0	0	0	0	0	0	0	0
ENSG00000116396	KCNC4	22	21	35	2	12	12	23	1	25	32	22	25	0	0	0	5	0	0	0	0	0	0	0	0	0	0	0	0	0	127	86	61	0	0	0	0	0	0
ENSG00000227963	RBM15-AS1	0	0	0	0	0	0	0	0	0	5	0	0	0	0	0	0	0	0	0	0	0	0	0	0	0	0	0	0	0	0	0	0	0	0	0	0	0	0
ENSG00000162775	RBM15	16	24	59	27	17	17	24	9	21	24	24	24	0	2	0	0	0	0	0	0	0	60	0	0	0	0	6	0	0	25	0	78	0	0	0	0	0	0
ENSG00000224699	LAMTOR5-AS1	0	0	1	0	0	0	0	0	1	0	0	2	0	0	0	0	0	0	0	0	0	0	0	0	0	0	0	0	0	0	0	0	0	0	0	0	0	0
ENSG00000168679	SLC16A4	6	0	8	35	0	0	15	10	3	13	5	11	0	1	43	0	0	0	0	0	0	0	0	0	0	0	0	1	0	126	0	5	0	0	0	0	0	0
ENSG00000273373	AL355488.1	2	0	0	13	0	6	4	4	3	7	1	7	0	1	0	0	0	0	0	0	0	0	0	0	0	0	0	0	0	73	0	0	0	0	0	0	0	0
ENSG00000134248	LAMTOR5	182	187	165	201	174	142	153	116	134	172	128	110	243	4	101	39	0	0	88	54	78	74	2	0	81	79	193	21	280	553	0	491	0	0	0	0	0	2
ENSG00000177301	KCNA2	2	9	18	0	0	0	0	7	0	2	1	0	0	0	0	0	0	0	0	0	0	0	0	0	0	0	0	0	0	1	0	1	0	0	0	0	0	0
ENSG00000259834	AL365361.1	35	34	79	16	40	19	0	0	1	9	0	4	0	0	0	0	0	0	0	0	0	0	0	0	0	0	0	0	8	133	75	0	0	0	0	0	0	0
ENSG00000177272	KCNA3	0	4	0	0	0	0	0	0	0	2	0	0	0	0	0	0	0	0	0	0	0	0	0	0	0	0	0	0	0	0	0	0	0	0	0	0	0	0
ENSG00000237415	NRBF2P3	1	12	20	33	14	13	3	6	11	1	7	14	0	0	1	0	128	0	0	0	0	0	0	0	0	0	0	0	0	40	0	0	0	0	0	0	0	0
ENSG00000143119	CD53	495	450	483	538	291	444	8	20	9	48	7	6	84	27	227	192	139	0	0	459	1	0	1	1	157	62	690	0	165	93	132	209	1	0	0	0	0	3
ENSG00000261654	AL360270.2	0	0	0	15	6	0	1	0	5	0	0	0	0	0	0	0	0	0	0	0	0	0	0	0	0	0	0	0	0	0	0	55	0	0	0	0	0	0
ENSG00000232811	AL360270.1	0	0	0	18	0	0	0	0	0	0	0	0	0	0	0	0	0	0	0	0	0	0	0	0	0	0	0	0	0	0	0	0	0	0	0	0	0	0
ENSG00000121931	LRIF1	5	20	22	14	20	6	17	19	26	34	27	33	0	0	0	0	0	0	0	14	0	0	0	0	125	0	19	0	71	179	0	27	0	0	0	0	0	1
ENSG00000156171	DRAM2	166	78	182	75	43	96	46	16	14	57	16	46	0	0	0	249	0	0	0	0	362	1	5	37	1	0	97	0	0	132	49	77	0	0	0	0	0	0
ENSG00000134255	CEPT1	45	115	72	56	71	54	24	26	25	32	31	42	0	27	139	48	1	8	0	0	0	0	0	0	11	0	68	0	83	197	0	228	0	0	0	0	0	0
ENSG00000272982	AL355816.1	1	16	3	11	13	45	0	5	2	0	5	0	0	0	0	98	0	0	20	0	0	0	0	0	0	0	0	0	0	1	94	0	0	0	0	0	0	0
ENSG00000273221	AL355816.2	13	5	12	23	4	101	6	10	12	22	9	5	0	0	0	0	0	0	0	0	0	0	0	0	5	0	0	0	0	20	0	0	0	0	0	0	0	0
ENSG00000162777	DENND2D	48	33	32	83	4	20	16	2	8	7	10	10	0	0	0	0	0	0	0	2	29	0	0	0	0	1	16	0	0	53	0	32	0	0	0	0	0	0
ENSG00000064886	CHI3L2	0	11	9	21	52	73	3	4	2	9	2	7	0	0	0	0	0	0	0	0	0	0	0	0	0	0	89	0	0	1	0	89	0	0	0	0	0	1
ENSG00000134216	CHIA	0	0	0	0	0	0	0	0	0	0	0	2	0	0	0	0	0	0	0	0	0	0	0	0	0	0	0	0	0	0	0	0	0	0	0	0	0	0
ENSG00000173947	PIFO	0	4	1	1	0	0	7	1	0	2	1	8	0	0	5	0	0	0	23	0	0	0	0	0	0	0	0	0	0	3	0	176	0	0	0	0	0	0
ENSG00000236012	HIGD1AP12	0	1	0	0	0	0	0	0	0	0	0	0	0	0	0	0	0	0	0	0	0	0	0	0	0	0	0	0	0	8	0	0	0	0	0	0	0	0
ENSG00000085465	OVGP1	0	3	0	0	0	0	1	2	4	5	9	3	0	0	0	0	0	0	0	0	0	0	0	0	3	0	0	0	0	38	0	0	0	0	0	0	0	0
ENSG00000260948	AL390195.2	0	0	0	0	0	0	0	0	0	0	6	0	0	0	0	0	0	0	0	0	0	0	0	0	22	0	0	0	0	0	0	0	0	0	0	0	0	0
ENSG00000243960	AL390195.1	4	0	0	0	0	0	0	0	0	0	0	0	0	0	0	0	0	0	0	0	0	0	0	0	0	0	0	0	0	0	0	0	0	0	0	0	0	0
ENSG00000116455	WDR77	96	8	11	42	28	90	25	22	39	32	17	22	0	1	0	0	0	0	0	0	36	22	0	0	35	0	112	0	1	157	0	75	0	0	0	0	0	0
ENSG00000199890	Y_RNA	0	0	0	0	0	0	0	0	0	1	0	0	0	0	0	0	0	0	0	0	0	0	0	0	0	0	0	0	0	0	0	0	0	0	0	0	0	0
ENSG00000116459	ATP5F1	33	127	133	84	142	125	51	48	58	55	28	59	0	0	0	142	0	15	32	2	0	0	3	50	8	0	117	1	2	268	0	196	0	0	1	0	0	0
ENSG00000143110	C1orf162	43	37	36	46	30	31	1	0	0	0	0	6	0	0	0	1	72	0	0	0	9	0	0	0	0	0	163	0	0	0	0	0	0	0	0	0	0	1
ENSG00000121933	TMIGD3	86	63	33	52	50	1	0	0	0	0	0	5	0	0	0	0	0	0	0	0	0	0	0	0	0	0	0	71	0	1	0	1	0	0	0	0	0	0
ENSG00000282608	ADORA3	52	32	38	72	19	44	4	0	1	5	1	0	0	1	0	56	0	0	0	0	0	0	0	0	0	0	24	0	0	12	0	0	0	0	0	0	1	0
ENSG00000116473	RAP1A	176	205	379	306	236	138	55	67	77	120	46	96	0	165	369	0	142	0	221	14	119	0	0	21	55	93	105	0	12	411	60	456	0	0	0	0	0	2
ENSG00000215867	KRT18P57	0	0	0	0	0	0	0	0	0	0	0	0	0	0	0	0	0	0	0	0	0	0	0	0	0	0	1	0	0	3	0	0	0	0	0	0	0	0
ENSG00000197852	FAM212B	6	2	7	6	0	14	7	17	5	11	2	1	0	0	0	38	0	0	124	57	0	0	0	0	0	0	0	0	1	1	0	0	0	0	0	0	0	0
ENSG00000227811	FAM212B-AS1	0	0	0	0	0	0	0	0	0	0	0	2	0	0	0	0	0	0	0	0	0	0	0	0	0	0	0	1	0	0	0	0	0	0	0	0	0	0
ENSG00000064703	DDX20	13	0	14	14	7	18	15	18	6	15	3	14	0	2	0	0	0	0	0	0	0	0	0	0	1	1	0	0	0	254	0	1	0	0	0	0	0	0
ENSG00000171385	KCND3	5	30	25	13	9	21	2	0	10	19	4	1	0	0	99	4	0	0	0	0	0	0	0	0	0	0	0	0	0	46	0	5	0	0	0	0	0	1
ENSG00000231437	LINC01750	0	0	0	0	0	0	1	5	1	1	2	0	0	81	0	0	0	0	0	0	0	0	0	0	0	0	0	0	0	0	0	0	0	0	0	0	0	0
ENSG00000234388	TXNP3	0	0	0	0	0	0	0	0	0	0	0	0	0	0	0	0	0	0	0	0	1	0	0	0	0	0	0	0	0	0	0	0	0	0	0	0	0	0
ENSG00000143079	CTTNBP2NL	33	14	41	24	91	14	4	3	13	10	8	15	0	23	88	23	344	0	0	13	54	0	0	0	35	1	35	0	0	7	0	41	0	0	0	0	0	0
ENSG00000134245	WNT2B	0	12	2	5	0	2	2	0	0	3	0	0	0	0	38	0	0	36	0	0	0	0	0	0	0	0	0	0	0	0	0	0	0	0	0	0	0	0
ENSG00000273483	AL354760.1	0	0	0	0	0	0	0	0	4	0	3	0	0	0	0	0	0	0	0	0	0	0	0	0	0	0	0	0	0	0	0	0	0	0	0	0	0	0
ENSG00000007341	ST7L	0	16	12	6	13	0	4	18	2	12	16	4	0	0	0	115	0	0	0	0	0	0	1	0	0	0	41	0	1	0	66	0	0	0	1	0	0	0
ENSG00000116489	CAPZA1	248	253	236	357	365	281	131	78	135	147	102	114	3	61	53	94	32	121	38	0	107	336	0	14	125	98	570	31	149	462	3	325	0	0	1	0	0	4
ENSG00000155363	MOV10	0	0	0	0	0	0	0	0	0	0	2	0	0	0	0	0	0	0	0	0	0	0	0	0	0	0	0	0	0	0	0	0	0	0	0	0	0	0
ENSG00000225075	AL603832.1	0	0	0	0	0	0	0	0	0	0	0	2	0	0	0	0	0	0	0	0	0	0	0	0	0	0	0	0	0	0	0	0	0	0	0	0	0	0
ENSG00000155366	RHOC	69	17	21	24	2	2	20	36	17	16	6	28	0	0	0	214	37	5	0	0	0	0	4	4	0	0	6	0	0	23	0	82	0	0	0	0	0	0
ENSG00000155367	PPM1J	0	13	0	8	0	0	7	14	8	22	7	0	0	0	0	0	0	0	0	0	0	0	0	0	0	0	37	0	0	17	0	0	0	1	0	0	0	0
ENSG00000261595	AL603832.2	0	0	0	2	0	0	0	0	0	0	0	0	0	0	0	0	0	0	0	0	0	0	0	0	0	0	0	0	0	0	0	0	0	0	0	0	0	0
ENSG00000224167	AL390729.1	0	0	3	1	0	0	0	0	0	1	0	0	0	0	0	0	0	0	0	0	0	0	0	0	0	0	0	0	0	0	0	0	0	0	0	0	0	0
ENSG00000155380	SLC16A1	75	24	71	20	46	4	0	0	0	0	5	1	0	0	20	0	0	0	0	1	0	0	0	0	0	0	0	0	0	0	0	0	0	0	0	0	0	1
ENSG00000226419	SLC16A1-AS1	16	25	23	34	49	5	1	8	4	7	5	11	0	1	0	1	16	0	0	0	2	0	0	0	0	0	0	0	16	112	46	61	0	0	0	0	0	0
ENSG00000238198	AL357055.3	0	0	0	0	11	0	0	0	0	0	0	1	46	0	0	0	0	0	0	0	0	0	0	0	0	0	0	0	0	0	0	0	0	0	0	0	0	0
ENSG00000198799	LRIG2	17	25	23	15	6	18	10	22	14	28	5	33	0	14	1	63	66	0	97	0	0	0	0	0	41	0	0	0	2	31	0	266	0	0	0	0	0	0
ENSG00000233839	AL357055.1	47	46	60	40	18	48	16	19	13	24	21	15	92	30	0	20	0	0	0	0	84	0	1	0	41	1	60	0	93	63	0	58	0	0	0	0	40	1
ENSG00000236887	AL357055.2	42	102	67	96	93	99	23	22	45	99	33	44	0	46	50	22	19	33	29	0	3	3	0	3	37	1	81	1	64	276	5	135	37	0	0	0	0	4
ENSG00000081026	MAGI3	0	0	9	7	1	0	9	25	20	27	21	16	0	0	0	0	0	0	0	3	0	0	0	0	1	0	1	14	0	24	0	4	0	0	0	0	0	0
ENSG00000232499	AL391058.1	6	0	0	1	0	0	0	0	0	0	0	0	0	0	0	26	0	0	0	7	0	0	0	0	0	0	0	0	0	0	0	0	0	0	0	0	0	0
ENSG00000238256	MTND5P20	0	0	0	0	0	0	0	0	0	0	0	0	0	0	0	0	0	0	0	0	0	0	0	0	0	0	0	0	0	0	0	7	0	0	0	0	0	0
ENSG00000116793	PHTF1	12	0	32	30	51	1	6	12	11	14	10	8	0	1	0	0	0	0	0	0	0	0	0	0	0	0	0	0	1	85	0	0	0	0	0	0	0	0
ENSG00000081019	RSBN1	44	53	27	55	83	9	23	0	22	15	27	26	0	2	1	0	80	0	43	0	0	0	0	0	68	92	0	0	41	282	0	1	0	0	0	0	0	0
ENSG00000231128	AL137856.1	0	0	0	0	0	0	0	0	0	0	2	1	0	0	0	0	0	0	0	0	0	0	0	0	0	0	0	0	0	0	0	0	0	0	0	0	0	0
ENSG00000134242	PTPN22	15	39	34	57	37	11	1	15	6	9	0	7	0	0	0	0	0	0	0	0	0	0	0	0	70	1	13	186	0	0	0	2	0	0	0	0	0	0
ENSG00000188761	BCL2L15	0	0	0	0	0	0	0	1	0	4	0	1	0	0	0	0	0	0	0	0	0	0	0	0	0	0	0	0	0	0	0	0	0	0	0	0	0	0
ENSG00000134262	AP4B1	0	7	42	0	0	0	0	1	0	1	1	0	0	0	0	0	0	0	0	0	0	0	0	0	0	0	0	0	0	0	0	56	0	0	0	0	0	0
ENSG00000118655	DCLRE1B	23	29	33	16	5	17	7	13	6	21	5	0	0	0	6	0	0	0	0	0	0	0	0	0	26	0	52	0	79	54	0	64	0	0	0	0	0	0
ENSG00000163349	HIPK1	155	85	89	53	103	82	8	23	16	49	23	11	0	0	26	13	0	38	30	0	0	0	0	0	0	0	75	0	0	202	109	112	0	0	0	0	0	0
ENSG00000116774	OLFML3	121	231	185	231	193	189	19	62	16	104	12	24	189	77	18	213	84	37	29	142	122	1	2	1	1	65	2	1	333	128	276	84	0	0	2	0	0	0
ENSG00000270780	AL591742.1	11	23	23	9	22	23	8	2	8	6	9	7	65	0	0	10	1	1	4	0	0	0	0	2	4	0	25	2	6	33	4	97	0	0	1	0	0	0
ENSG00000271419	AL035410.2	0	0	1	0	0	0	0	0	0	0	0	0	0	0	0	0	0	0	0	0	0	0	0	0	0	0	0	0	0	0	0	3	0	0	0	0	0	0
ENSG00000197323	TRIM33	96	138	184	157	35	125	73	46	86	104	100	62	69	274	289	0	91	0	58	47	67	1	0	2	142	0	101	0	25	742	0	195	1	1	1	1	0	0
ENSG00000226984	AL035410.1	0	0	0	4	0	0	0	0	0	0	0	0	0	0	0	0	0	0	0	0	0	0	0	0	0	0	0	0	0	0	0	0	0	0	0	0	0	0
ENSG00000225650	EIF2S2P5	3	6	3	4	2	7	6	7	7	14	5	8	0	0	0	28	0	0	0	0	0	3	0	0	0	0	5	0	2	41	0	10	0	0	0	0	0	0
ENSG00000116752	BCAS2	40	40	31	37	31	24	26	29	38	50	29	39	0	106	1	1	50	122	0	0	1	0	0	0	190	46	119	0	0	331	3	99	0	0	0	0	0	0
ENSG00000175984	DENND2C	4	21	3	3	3	0	0	0	0	0	0	0	0	0	0	1	57	0	0	0	0	0	0	0	0	0	0	0	0	0	0	0	0	0	0	0	0	0
ENSG00000116748	AMPD1	15	0	0	6	0	1	0	0	0	0	0	0	0	0	0	0	0	0	0	0	0	0	0	0	0	1	0	0	45	0	0	0	0	0	0	0	0	0
ENSG00000213281	NRAS	27	57	42	104	43	33	7	26	28	24	20	51	0	1	39	26	0	0	0	3	0	0	0	0	0	22	19	8	5	118	0	39	0	0	0	0	0	1
ENSG00000009307	CSDE1	327	427	511	598	304	328	281	254	304	411	315	320	170	2	336	331	336	7	304	228	375	60	39	15	381	137	364	172	242	2084	251	997	92	2	2	0	1	4
ENSG00000052723	SIKE1	17	40	69	88	52	0	20	5	21	43	31	45	0	50	102	0	0	33	0	1	0	1	0	0	127	1	27	0	0	181	0	179	0	0	0	0	1	0
ENSG00000198765	SYCP1	0	0	0	0	0	6	0	2	0	12	0	0	0	0	15	0	0	4	0	0	0	0	0	0	0	0	0	0	0	0	0	0	0	0	0	0	0	0
ENSG00000134200	TSHB	0	0	0	0	0	0	0	0	0	0	0	0	0	0	0	0	0	0	0	0	0	0	0	0	0	0	0	0	0	2	0	0	0	0	0	0	0	0
ENSG00000134198	TSPAN2	13	16	0	0	0	17	1	10	2	11	8	31	80	0	0	0	187	0	42	0	0	0	0	0	0	0	0	0	56	0	0	12	0	0	0	0	0	0
ENSG00000228035	AL512638.2	0	0	0	0	0	0	0	0	0	0	0	0	0	0	0	0	0	1	0	0	0	0	0	0	0	0	0	0	0	0	0	0	0	0	0	0	0	0
ENSG00000134259	NGF	0	0	0	11	0	0	0	0	0	0	0	0	0	0	0	0	0	0	0	0	0	0	0	0	0	0	0	0	0	0	0	0	0	0	0	0	0	0
ENSG00000173218	VANGL1	0	23	20	4	46	23	27	28	12	36	17	37	0	0	0	159	0	0	0	0	0	0	2	0	2	0	27	85	0	154	0	1	0	0	0	0	0	0
ENSG00000118729	CASQ2	8	0	1	11	0	0	1	4	0	0	3	0	0	0	0	0	110	0	0	0	0	0	0	0	1	0	0	0	0	0	0	0	0	0	0	0	0	0
ENSG00000177551	NHLH2	0	0	0	2	0	0	0	0	0	0	0	0	0	0	0	0	0	0	0	0	0	0	0	0	0	0	0	0	0	0	0	0	0	0	0	0	0	0
ENSG00000163393	SLC22A15	50	28	12	7	15	49	3	3	14	15	5	0	1	0	0	0	0	0	0	0	0	0	0	0	0	0	0	0	0	27	0	46	0	0	0	0	0	0
ENSG00000173212	MAB21L3	5	0	0	0	0	0	6	0	0	0	0	0	0	0	0	0	0	0	0	0	0	0	0	0	0	0	0	0	0	0	0	110	0	0	0	0	0	0
ENSG00000163399	ATP1A1	207	241	228	196	232	153	362	349	428	555	382	445	82	42	311	40	610	63	46	49	0	0	38	43	155	34	467	0	51	1695	50	1516	2	2	0	0	0	7
ENSG00000203865	ATP1A1-AS1	0	0	0	0	0	0	0	0	0	0	0	2	0	0	0	0	0	0	0	0	0	0	0	0	0	0	0	0	0	0	0	13	0	0	0	0	0	0
ENSG00000212385	RNU6-817P	9	0	0	7	0	0	3	0	1	2	0	0	0	0	0	0	0	0	0	0	0	0	0	0	0	0	0	0	0	0	0	0	0	0	0	0	0	0
ENSG00000233154	LINC01762	0	0	0	0	0	0	0	0	0	0	1	0	0	0	0	0	0	0	0	0	0	0	0	0	0	0	0	0	0	0	0	0	0	0	0	0	0	0
ENSG00000224950	AL390066.1	0	0	8	6	0	21	0	0	0	0	0	0	0	0	0	0	0	0	0	0	0	0	0	0	0	1	0	0	0	33	0	0	0	0	0	0	0	0
ENSG00000116815	CD58	162	97	56	132	103	93	22	18	13	39	15	23	0	3	66	0	0	0	0	28	1	0	0	0	197	3	209	0	219	316	0	400	0	2	0	0	0	5
ENSG00000177173	NAP1L4P1	0	14	3	0	6	0	0	2	8	0	6	5	0	0	0	0	0	0	0	0	0	0	0	0	0	0	3	0	42	37	0	3	0	0	0	0	0	0
ENSG00000143061	IGSF3	0	0	0	8	0	0	58	45	46	57	75	54	0	3	0	0	0	0	0	0	156	0	0	0	93	0	0	0	0	524	0	163	0	0	0	0	0	0
ENSG00000223489	NEFHP1	2	2	3	4	1	2	2	2	3	2	4	5	0	0	0	0	0	0	0	0	0	0	0	0	7	0	3	0	0	7	0	13	0	0	0	0	0	0
ENSG00000116824	CD2	64	112	55	102	79	7	7	2	1	22	2	12	2	0	0	127	0	0	0	0	1	0	0	0	0	32	31	0	22	26	187	30	0	0	0	0	0	0
ENSG00000272715	AL157904.1	0	0	0	4	0	0	0	0	0	0	0	0	0	0	0	0	0	0	0	0	0	0	0	0	0	0	0	0	0	0	0	0	0	0	0	0	0	0
ENSG00000134247	PTGFRN	256	203	200	179	139	111	158	136	156	216	148	168	1	5	113	165	256	26	43	1	49	0	1	1	36	209	68	1	180	937	161	397	0	2	1	1	1	3
ENSG00000116830	TTF2	85	68	16	10	0	0	9	3	6	7	9	6	2	0	0	0	0	0	0	0	0	0	0	0	0	0	7	0	64	101	35	60	0	0	0	0	17	0
ENSG00000134253	TRIM45	0	0	0	7	0	1	3	0	0	1	4	3	0	0	0	0	0	0	0	0	0	0	0	0	0	0	0	0	0	0	0	2	0	0	0	0	0	0
ENSG00000134258	VTCN1	0	0	0	3	0	0	103	59	92	130	88	40	0	1	0	0	0	0	0	0	0	0	1	1	64	13	2	0	21	308	44	237	0	1	0	0	0	0
ENSG00000271427	AL358072.1	0	0	10	0	0	0	0	0	0	1	3	0	0	0	0	0	0	0	0	0	0	0	0	0	0	0	0	0	0	13	0	0	0	0	0	0	0	0
ENSG00000198162	MAN1A2	183	126	206	237	226	146	138	47	95	119	131	106	141	160	114	316	0	64	1	24	30	0	52	0	76	33	315	0	184	446	40	122	1	0	0	1	0	48
ENSG00000279513	AL157902.2	0	0	0	4	0	0	0	0	0	0	0	0	0	0	0	0	0	0	0	0	0	0	0	0	2	0	0	0	0	0	0	0	0	0	0	0	0	0
ENSG00000183508	FAM46C	111	74	50	78	126	40	18	17	14	23	15	18	106	0	234	48	0	0	0	50	0	0	1	67	25	40	0	0	94	58	0	83	0	0	0	0	0	0
ENSG00000213262	VDAC2P3	0	0	0	0	0	0	0	0	0	0	0	0	0	0	17	0	0	0	0	0	0	0	0	0	0	0	0	0	0	0	0	0	0	0	0	0	0	0
ENSG00000228217	PNRC2P1	0	4	0	13	0	0	1	0	1	0	1	2	0	0	0	0	0	0	0	0	3	0	0	0	1	0	0	0	0	1	0	0	0	0	0	0	0	0
ENSG00000196505	GDAP2	4	1	49	66	4	15	17	20	30	38	33	16	0	0	33	0	31	0	0	14	0	0	0	4	0	0	0	0	45	97	0	33	0	0	0	0	0	0
ENSG00000065183	WDR3	17	34	26	1	34	12	9	20	32	23	27	27	87	0	0	0	0	0	1	29	69	65	0	0	0	0	22	0	0	152	0	92	0	0	0	1	0	0
ENSG00000155761	SPAG17	0	0	0	0	2	0	1	6	2	29	6	3	0	0	0	1	31	0	0	1	0	0	25	0	0	0	1	0	0	1	0	0	0	0	0	0	0	0
ENSG00000092607	TBX15	6	6	0	32	17	0	0	0	0	4	0	0	0	0	0	0	0	0	0	0	0	0	0	0	0	0	0	0	0	0	0	0	0	0	0	0	0	0
ENSG00000116874	WARS2	5	12	0	24	0	5	1	0	4	14	3	0	0	0	0	0	0	0	0	0	0	0	0	0	0	0	0	0	0	35	0	0	0	0	0	0	0	0
ENSG00000223575	RBMX2P3	6	1	5	4	3	0	0	1	1	3	8	3	0	0	0	0	0	0	0	0	0	0	0	0	0	0	0	0	0	0	0	22	0	0	0	0	0	0
ENSG00000236804	RPS3AP12	0	0	0	0	0	0	0	0	0	2	0	1	0	0	0	0	0	10	0	0	0	0	0	0	0	0	0	0	0	23	0	0	0	0	0	0	0	0
ENSG00000231365	AL359915.2	0	3	0	15	0	0	0	0	1	1	0	0	0	0	0	0	0	0	0	0	0	0	0	0	0	0	0	0	2	0	0	0	0	0	0	0	0	0
ENSG00000227056	RPL6P2	0	0	0	0	0	0	0	0	0	0	0	0	0	0	0	0	0	0	0	0	0	0	0	0	1	0	0	0	0	1	0	0	0	3	0	0	0	0
ENSG00000116882	HAO2	0	0	0	0	9	0	0	0	0	5	0	0	0	0	0	0	0	0	0	0	0	0	0	0	0	0	0	0	0	0	0	0	0	0	0	0	0	0
ENSG00000260941	LINC00622	0	0	0	1	0	0	0	0	0	0	0	0	0	0	0	0	0	0	0	0	0	0	0	0	0	0	0	0	0	0	0	1	0	0	0	0	0	0
ENSG00000143067	ZNF697	0	19	10	4	10	0	5	0	3	4	13	13	0	0	0	0	0	0	0	0	0	0	0	0	0	0	0	0	0	0	0	18	0	0	0	0	0	0
ENSG00000092621	PHGDH	0	3	18	5	0	4	10	5	7	3	8	19	0	0	10	0	16	0	0	0	0	0	0	0	0	0	0	0	0	71	0	27	0	0	0	0	0	0
ENSG00000134240	HMGCS2	0	0	0	0	0	0	0	5	10	31	4	11	0	0	0	0	0	0	0	0	0	0	0	0	0	0	0	0	0	41	0	0	0	0	0	0	0	0
ENSG00000261662	AL359752.1	0	6	18	17	0	0	10	0	1	1	3	0	0	0	0	0	82	0	0	0	0	0	0	0	0	0	0	0	0	0	0	0	0	0	0	0	0	0
ENSG00000134250	NOTCH2	339	258	263	290	253	314	97	65	108	141	98	86	78	1	85	164	259	33	42	52	7	0	0	0	0	0	426	157	123	195	51	260	0	0	0	0	0	2
ENSG00000265808	SEC22B	30	17	16	31	8	17	17	6	14	28	17	19	0	0	2	0	2	1	0	0	0	0	0	26	30	0	79	0	2	38	0	17	0	2	0	0	0	0
ENSG00000274642	AC244669.2	0	0	0	0	0	0	2	0	0	0	0	1	0	0	0	0	5	0	0	3	0	0	0	0	0	0	0	0	0	0	0	0	0	0	0	0	0	0
ENSG00000223804	AC244669.1	0	0	0	0	0	0	0	0	0	0	0	0	0	0	0	0	0	0	0	0	0	0	0	0	0	0	0	0	0	2	0	0	0	0	0	0	0	0
ENSG00000270392	PFN1P2	0	0	0	0	0	0	0	0	0	0	0	0	0	0	0	0	0	0	0	0	0	0	0	0	0	0	0	0	0	1	0	4	0	0	0	0	0	0
ENSG00000270231	NBPF8	12	1	23	5	35	15	2	0	6	6	4	0	1	0	0	20	1	0	32	0	1	0	1	0	0	0	7	0	1	13	2	4	0	0	0	0	0	0
ENSG00000275131	AC241952.1	19	12	7	25	28	18	8	2	11	4	3	10	0	0	1	1	0	0	0	0	0	46	0	0	49	1	11	0	209	12	0	46	0	0	0	0	0	0
ENSG00000273136	NBPF26	0	1	4	2	0	0	4	0	3	11	1	1	0	0	0	0	5	0	0	0	0	0	0	0	0	0	0	0	0	24	0	1	0	0	0	0	0	0
ENSG00000275538	RNVU1-19	0	5	0	12	0	0	0	0	0	1	0	0	0	0	0	0	0	0	0	0	0	0	0	0	0	0	0	0	0	0	0	0	0	0	0	0	0	0
ENSG00000281741	AC241377.3	0	0	0	0	0	0	0	0	0	0	0	0	4	0	0	0	0	0	0	0	0	0	0	0	0	0	0	0	0	0	0	0	0	0	0	0	0	0
ENSG00000226067	LINC00623	0	3	5	8	0	2	0	0	0	5	2	1	0	0	0	0	0	0	0	0	0	0	0	0	0	0	17	0	0	40	0	62	0	0	0	0	0	0
ENSG00000198019	FCGR1B	20	9	26	28	1	27	2	5	0	1	0	0	0	3	0	0	0	0	0	0	0	0	0	0	0	0	23	0	0	5	0	1	0	0	0	0	0	0
ENSG00000233029	AC244453.2	0	0	0	0	0	0	0	0	0	0	0	1	0	0	0	0	0	0	0	0	0	0	0	0	0	0	0	0	0	0	0	0	0	0	0	0	0	0
ENSG00000223345	HIST2H2BA	0	0	0	0	0	0	0	0	0	0	0	0	0	0	0	0	0	0	0	1	0	0	0	0	0	0	0	0	0	22	0	0	0	0	0	0	0	0
ENSG00000268993	AC244453.4	0	0	0	0	0	0	0	0	0	0	0	0	0	0	0	0	0	0	0	1	0	0	0	0	0	0	0	0	0	0	0	0	0	0	0	0	0	0
ENSG00000188610	FAM72B	2	1	0	0	0	0	1	0	0	0	1	0	0	0	0	0	0	0	0	0	0	0	0	0	0	0	0	0	0	0	0	12	0	0	0	0	0	0
ENSG00000171943	SRGAP2C	24	42	39	26	51	38	7	7	4	4	9	17	0	0	80	58	30	0	38	0	0	0	1	0	0	0	10	0	0	3	0	0	0	0	0	1	1	0
ENSG00000275129	AC243994.1	0	0	0	0	3	0	0	0	0	0	0	0	0	0	0	0	0	0	0	0	0	0	0	0	0	0	0	0	0	0	0	0	0	0	0	0	0	0
ENSG00000230806	SRGAP2-AS1	0	0	0	0	0	0	0	0	0	0	0	0	0	0	0	0	0	0	0	0	0	0	0	0	0	0	0	0	0	0	0	1	0	0	0	0	0	0
ENSG00000227082	AC244021.1	0	0	0	0	0	0	0	0	0	0	0	0	0	0	0	0	0	0	0	0	0	0	0	0	0	0	68	0	0	0	0	0	0	0	0	0	0	0
ENSG00000233432	AL592494.2	28	31	79	22	55	23	39	8	24	26	21	33	1	0	0	0	0	0	16	0	14	67	0	0	12	2	22	0	1	103	0	90	0	0	0	0	0	0
ENSG00000272583	AL592494.3	0	9	0	1	0	0	0	0	0	0	0	0	0	0	0	0	0	0	0	0	0	0	0	0	0	0	0	0	0	0	0	73	0	0	0	0	0	0
ENSG00000231752	EMBP1	10	32	13	22	1	0	2	1	1	14	6	1	0	0	55	3	0	0	0	1	35	0	0	0	0	0	59	0	0	0	18	6	0	0	0	0	0	0
ENSG00000179571	NBPF17P	0	0	1	0	0	0	0	0	0	0	0	2	0	0	0	0	0	0	0	0	0	0	0	0	0	0	0	0	0	0	0	0	0	0	0	0	0	0
ENSG00000232721	AC239800.2	0	1	0	0	0	0	0	0	0	0	0	0	0	0	0	0	0	0	0	0	0	0	0	0	0	0	0	0	0	0	0	0	0	0	0	0	0	0
ENSG00000265531	FCGR1CP	0	0	9	84	0	0	0	0	0	0	0	0	0	0	0	0	0	0	0	0	0	0	0	0	0	0	32	0	0	0	0	0	0	0	0	0	0	0
ENSG00000276756	AC245595.2	0	0	0	0	0	0	0	0	1	0	0	0	0	0	0	0	0	0	0	0	0	0	0	0	0	0	0	0	0	0	0	0	0	0	0	0	0	0
ENSG00000207205	RNVU1-15	2	5	1	5	1	0	0	5	0	5	1	0	0	0	0	0	0	0	0	0	0	0	0	0	0	0	0	0	0	10	0	0	0	0	0	0	0	0
ENSG00000266338	NBPF15	1	15	2	1	7	7	0	2	1	1	1	1	0	0	0	2	3	4	0	0	1	0	0	0	0	0	0	0	0	31	1	5	0	0	0	16	0	0
ENSG00000275291	U1	0	0	0	0	0	0	0	0	0	0	0	0	0	0	0	0	0	0	0	0	0	0	0	0	8	0	0	0	0	0	0	0	0	0	0	0	0	0
ENSG00000278099	U1	5	0	1	6	0	13	5	6	0	0	2	4	1	0	0	0	0	0	0	0	0	0	0	0	0	0	48	0	1	15	0	1	0	0	0	0	0	2
ENSG00000277918	U1	1	0	0	0	0	0	0	0	0	0	0	0	0	0	0	0	0	0	0	0	0	0	0	0	0	0	0	0	0	0	0	0	0	0	0	0	0	0
ENSG00000277199	LINC01632	0	2	0	0	0	0	0	0	0	0	0	0	0	0	0	0	0	0	0	0	0	0	0	0	0	0	0	0	0	0	0	0	0	0	0	0	0	0
ENSG00000273825	FP700111.2	0	0	0	0	0	0	0	1	0	0	0	0	0	0	0	0	0	0	0	0	0	0	0	0	0	0	0	0	0	0	0	0	0	0	0	0	0	0
ENSG00000196369	SRGAP2B	0	12	0	19	23	23	0	1	2	3	0	3	0	0	0	30	23	1	17	1	0	0	0	0	0	0	1	0	0	19	0	1	0	0	0	0	0	0
ENSG00000272419	AC241585.2	0	0	0	6	0	0	0	0	0	0	0	0	0	0	0	0	0	0	0	0	0	0	0	0	0	0	0	0	0	0	0	0	0	0	0	0	0	0
ENSG00000281571	AC241585.3	0	0	0	0	0	0	0	0	2	0	0	0	101	0	0	0	0	0	0	0	0	0	0	0	0	0	0	0	0	0	0	0	0	0	0	0	0	0
ENSG00000223612	AC241585.1	0	0	0	1	0	0	1	0	0	0	0	0	0	0	0	0	0	0	0	0	0	0	0	0	0	0	0	0	0	0	0	0	0	0	0	0	0	0
ENSG00000162825	NBPF20	5	1	1	2	0	1	2	0	0	0	0	0	0	0	0	1	0	0	0	0	0	0	0	0	0	0	0	0	0	12	0	0	0	0	0	0	0	0
ENSG00000270722	U1	0	0	1	0	5	0	0	0	0	0	0	0	0	0	0	0	0	0	0	0	0	0	0	0	0	0	0	0	0	0	0	0	0	0	0	0	0	0
ENSG00000272150	NBPF25P	3	2	12	2	0	4	0	2	0	2	2	1	0	0	0	16	2	0	0	0	1	0	0	0	1	0	1	0	0	29	0	2	0	0	0	0	0	0
ENSG00000117262	GPR89A	0	1	0	13	3	16	4	1	0	6	1	0	0	0	0	0	0	0	0	0	0	0	0	1	0	0	0	0	0	17	0	0	0	0	0	0	0	0
ENSG00000174827	PDZK1	0	0	12	0	0	0	4	0	0	0	0	0	0	0	0	0	0	0	0	0	0	0	0	0	0	0	0	0	0	0	0	0	0	0	0	0	0	0
ENSG00000117281	CD160	9	35	4	5	0	9	1	3	9	1	0	1	0	0	0	0	9	0	0	1	0	0	0	0	0	0	0	10	0	1	0	0	0	0	0	0	0	1
ENSG00000265491	RNF115	234	189	181	181	96	160	84	85	92	113	73	127	55	4	93	0	121	6	215	127	0	1	16	0	181	28	147	0	57	840	138	274	1	1	1	0	0	2
ENSG00000186141	POLR3C	52	25	51	58	34	7	48	14	38	42	47	34	3	1	0	50	0	0	0	0	55	0	1	0	65	3	48	0	125	125	19	53	0	0	1	0	0	1
ENSG00000186364	NUDT17	4	28	7	18	3	1	1	10	8	16	4	9	0	0	0	0	0	0	0	0	0	0	0	0	45	0	0	0	0	28	0	1	0	0	0	0	0	0
ENSG00000131788	PIAS3	5	19	36	29	48	17	20	15	47	39	32	48	67	1	0	0	0	0	0	1	0	0	0	0	0	110	0	0	40	237	0	75	0	0	0	0	0	0
ENSG00000198483	ANKRD35	0	26	13	20	0	0	5	0	0	0	0	0	3	0	1	1	0	0	1	0	2	3	5	2	0	1	0	0	54	1	2	12	0	0	0	0	1	0
ENSG00000143127	ITGA10	35	20	22	16	15	12	7	7	9	16	11	11	0	1	0	0	77	0	0	1	0	0	0	0	5	0	19	0	1	99	34	61	0	0	0	0	0	0
ENSG00000131779	PEX11B	8	29	42	36	40	36	36	96	46	65	44	22	1	120	0	1	0	0	0	0	1	0	0	0	0	2	44	1	233	249	54	155	0	1	0	0	0	0
ENSG00000265241	RBM8A	240	240	288	265	186	306	258	212	253	259	208	337	139	28	330	49	115	2	274	2	69	1	151	83	127	78	473	38	205	1615	60	467	0	48	23	0	1	5
ENSG00000211451	GNRHR2	0	0	0	2	0	0	8	0	0	0	0	0	0	0	0	0	0	0	0	0	0	0	0	0	0	0	0	0	0	0	0	1	0	0	0	0	0	0
ENSG00000234222	LIX1L-AS1	0	0	0	0	0	0	0	0	0	2	0	0	0	0	0	0	0	0	0	0	0	0	0	0	0	0	0	0	0	0	0	0	0	0	0	0	0	0
ENSG00000271601	LIX1L	149	93	84	80	161	166	7	1	6	16	7	8	0	1	183	67	109	0	21	1	48	0	2	0	22	1	1	99	32	166	36	79	0	0	0	0	0	1
ENSG00000121851	POLR3GL	166	160	204	144	185	222	17	20	19	38	14	32	63	52	222	38	8	0	0	0	0	0	0	5	0	2	128	90	0	215	0	207	0	0	0	1	0	1
ENSG00000265972	TXNIP	4069	4436	4682	4930	4277	5119	945	843	909	1511	1151	1111	1156	918	2723	4065	3225	711	2169	1501	1346	800	62	625	2838	361	3908	818	3104	6132	4378	3798	5	10	4	6	5	50
ENSG00000201558	RNVU1-6	0	2	4	0	0	3	2	2	0	0	1	1	0	0	0	0	0	0	0	0	0	0	0	0	0	0	0	0	0	0	0	0	0	0	0	0	0	0
ENSG00000233396	LINC01719	0	0	0	0	0	0	6	0	0	0	1	0	0	0	0	0	0	0	0	0	0	0	0	0	0	0	0	0	0	0	0	0	0	0	0	0	0	0
ENSG00000271425	NBPF10	0	0	3	0	1	0	0	0	0	1	0	2	0	0	0	0	0	0	0	0	0	0	0	0	0	0	0	0	0	2	0	7	0	0	0	0	0	0
ENSG00000276509	AC239799.2	2	3	1	0	1	1	0	0	1	2	0	2	0	0	3	0	0	0	0	0	0	0	0	0	0	0	0	0	0	1	0	0	0	1	0	0	0	0
ENSG00000271121	NUDT4P2	0	0	0	0	0	0	0	0	0	0	2	0	0	0	0	0	0	0	0	0	0	0	0	0	0	0	0	0	0	0	0	0	0	0	0	0	0	0
ENSG00000277420	AC245407.1	0	0	0	0	0	0	1	0	0	0	0	0	0	0	0	0	0	0	0	0	0	0	0	0	0	0	0	0	0	0	0	0	0	0	0	0	0	0
ENSG00000276975	HYDIN2	2	9	2	1	0	4	3	5	1	3	6	5	0	1	0	0	0	0	0	0	0	0	0	0	0	0	16	0	0	26	0	36	0	0	10	3	5	0
ENSG00000268043	NBPF12	0	0	0	4	0	0	6	0	0	0	4	0	0	0	0	0	1	0	0	0	0	0	0	0	0	1	0	0	0	0	2	90	0	0	0	0	0	0
ENSG00000244371	PFN1P8	1	0	0	0	0	0	1	1	0	0	0	0	0	0	0	0	0	0	0	0	0	0	0	0	0	0	0	0	0	0	0	0	0	0	0	0	0	0
ENSG00000230832	AC241584.1	56	44	26	59	19	56	30	15	31	53	31	46	0	3	0	86	58	0	0	11	0	0	3	0	0	1	30	0	0	160	126	48	0	0	0	0	0	0
ENSG00000283342	AC241584.2	0	0	1	0	0	0	0	0	0	0	4	5	0	0	0	0	0	0	0	0	0	0	0	0	0	0	0	0	0	0	0	0	0	0	0	0	0	0
ENSG00000131791	PRKAB2	53	26	59	57	45	17	31	28	30	54	27	52	0	0	0	0	0	0	0	0	84	0	0	0	123	0	17	0	0	30	0	111	0	0	0	0	1	0
ENSG00000237188	AC242426.3	14	0	0	0	0	0	0	0	0	0	0	0	0	0	0	0	0	0	0	0	0	0	0	0	0	0	0	0	0	0	0	0	0	0	0	0	0	0
ENSG00000131781	FMO5	1	0	5	15	25	0	27	34	32	30	14	20	0	0	2	36	1	0	0	0	0	0	1	0	3	0	0	0	0	89	0	20	0	1	0	0	0	0
ENSG00000180867	PDIA3P1	13	22	14	30	25	2	34	37	69	89	53	61	0	1	0	0	0	0	0	0	0	28	0	0	63	0	0	0	0	294	61	47	0	1	0	0	0	0
ENSG00000226015	CCT8P1	90	125	87	91	81	188	47	73	88	99	74	96	0	2	0	114	173	0	0	0	43	0	0	34	0	1	20	0	124	405	364	372	1	1	1	0	1	3
ENSG00000131778	CHD1L	31	26	41	23	27	42	3	10	22	22	15	1	0	1	0	0	72	1	0	0	1	0	0	0	0	0	20	73	0	240	0	59	0	0	0	0	0	1
ENSG00000278811	LINC00624	0	0	0	0	1	0	0	0	2	0	0	0	0	0	0	0	0	0	0	0	0	0	0	0	0	0	0	0	0	0	0	0	0	0	0	0	0	0
ENSG00000116128	BCL9	16	4	36	8	0	47	23	24	24	43	32	41	0	0	1	0	0	0	6	0	0	0	0	1	53	50	2	0	110	154	0	86	0	0	0	0	0	0
ENSG00000162836	ACP6	2	1	21	4	3	11	10	8	11	18	8	12	0	0	1	0	200	1	0	0	0	168	0	0	3	0	0	0	101	60	0	4	0	0	0	0	0	0
ENSG00000277762	RN7SL261P	0	0	0	0	0	0	0	0	0	2	0	0	0	0	0	0	0	0	0	0	0	0	0	0	0	0	0	0	0	0	0	0	0	0	0	0	0	0
ENSG00000265107	GJA5	75	22	43	74	40	34	4	19	6	8	7	1	0	1	0	0	254	0	0	0	0	0	0	0	1	0	148	0	0	166	0	0	0	1	0	0	1	2
ENSG00000274415	AC241644.3	0	0	0	0	0	0	1	0	0	0	0	0	0	0	0	0	0	0	0	0	0	0	0	0	0	0	0	0	0	0	0	0	0	0	0	0	0	0
ENSG00000223728	AC239801.1	0	0	0	0	0	0	0	0	0	5	0	0	0	0	0	0	0	0	0	0	0	0	0	0	0	0	0	0	0	0	0	0	0	0	0	0	0	0
ENSG00000188092	GPR89B	2	1	3	0	0	0	2	0	3	1	2	0	0	0	0	0	0	0	0	0	0	0	0	0	0	0	0	0	0	0	0	0	0	0	0	0	0	0
ENSG00000215859	PDZK1P1	0	0	0	0	0	0	0	0	0	0	0	0	0	0	0	0	0	1	0	0	0	0	3	0	0	0	0	0	0	0	0	0	7	0	0	0	0	0
ENSG00000273059	AC239803.2	0	0	0	0	0	0	0	0	0	0	0	0	0	0	0	8	0	0	0	0	0	0	0	0	0	0	0	0	0	0	0	0	0	0	0	0	0	0
ENSG00000274372	AC239803.3	0	0	0	0	0	0	0	0	0	0	2	0	0	0	0	0	0	0	0	0	0	0	0	0	0	0	0	0	0	0	0	0	0	0	0	0	0	0
ENSG00000263956	NBPF11	1	0	2	0	1	0	2	1	6	1	1	4	0	0	0	1	4	0	0	0	0	0	0	0	0	0	1	0	0	6	0	6	0	0	0	0	0	0
ENSG00000198658	ABHD17AP1	0	0	0	0	0	0	0	0	0	0	0	0	0	0	0	0	0	0	0	0	0	0	0	0	0	0	0	0	0	6	0	0	0	0	83	0	0	0
ENSG00000227733	AC239809.3	5	0	1	0	0	0	0	0	0	0	0	4	0	0	0	0	0	0	0	0	0	0	0	0	0	0	2	0	0	1	124	0	0	0	2	0	0	0
ENSG00000232265	AC239803.1	4	6	0	8	10	0	8	0	0	2	6	5	13	0	0	1	0	0	0	0	0	0	0	0	0	1	6	0	0	5	0	55	0	0	0	0	0	0
ENSG00000228626	AC245100.3	0	0	0	0	0	0	0	0	0	0	2	0	0	0	0	0	0	0	0	0	0	0	0	0	0	0	0	0	0	0	0	0	0	0	0	0	0	0
ENSG00000274020	LINC01138	0	21	8	7	0	3	7	2	11	28	10	5	0	0	5	0	0	0	27	0	0	0	1	0	0	1	0	0	0	115	0	48	0	0	0	0	0	0
ENSG00000238107	AC245100.6	0	0	0	0	0	0	0	0	1	1	0	0	0	0	0	0	0	0	0	0	0	0	0	0	0	0	0	0	0	0	0	0	0	0	0	0	0	0
ENSG00000224481	AC245100.1	0	3	1	0	0	0	0	0	0	0	0	0	0	0	0	0	0	0	0	0	0	0	0	0	0	0	0	0	0	0	0	0	0	0	0	0	0	0
ENSG00000252744	Y_RNA	0	0	0	0	0	2	0	0	0	0	0	0	0	0	0	0	0	0	0	0	0	0	0	0	0	0	0	0	0	0	0	0	0	0	0	0	0	0
ENSG00000202408	RNU1-122P	0	2	0	0	0	0	0	0	0	0	0	0	0	0	0	0	0	0	0	0	0	0	0	0	0	0	0	0	0	0	0	0	0	0	0	0	0	0
ENSG00000207340	RNVU1-1	1	0	2	0	0	0	0	0	1	0	0	0	0	0	0	0	0	0	0	0	0	0	0	0	0	0	0	0	0	0	0	0	0	0	0	0	0	0
ENSG00000252135	RNVU1-2	0	0	0	0	0	0	0	1	0	0	0	0	0	0	0	0	0	0	0	0	30	0	0	0	0	0	0	0	0	0	0	0	0	0	0	0	0	0
ENSG00000238825	RNU1-13P	0	0	0	5	0	0	0	0	1	0	4	1	0	0	0	0	0	0	0	0	0	0	0	0	0	0	16	0	0	1	0	0	0	0	0	0	0	0
ENSG00000231551	AC245100.4	1	0	14	25	0	19	3	8	2	0	1	2	0	0	0	0	0	6	0	2	0	0	0	0	1	0	2	1	1	3	0	1	0	0	0	0	1	0
ENSG00000201183	RNVU1-3	0	1	0	1	0	0	0	1	0	0	0	0	0	0	0	0	0	16	0	0	0	0	0	0	0	0	0	0	0	0	0	0	0	0	0	0	0	0
ENSG00000225871	AC245100.2	0	0	0	0	0	0	0	0	0	1	0	0	0	0	0	0	0	0	0	0	0	0	0	0	0	0	0	0	0	0	0	0	0	0	0	0	0	0
ENSG00000280649	AC245100.8	0	0	14	0	0	0	0	0	0	0	0	0	0	0	0	0	0	0	0	0	0	0	0	0	0	0	0	0	0	0	0	0	0	0	0	0	0	0
ENSG00000236334	PPIAL4G	38	38	33	32	50	30	47	42	30	49	30	43	4	6	28	38	8	28	1	0	1	6	0	5	57	8	37	8	3	226	82	203	1	0	52	0	0	0
ENSG00000274210	U1	0	2	1	0	1	0	0	0	1	3	2	0	1	0	12	0	0	0	0	0	0	0	0	6	0	0	0	0	0	55	0	0	0	0	0	0	0	0
ENSG00000270629	NBPF14	143	168	220	237	150	335	144	138	147	160	167	187	1	4	9	323	229	0	20	34	159	46	2	0	134	3	93	39	217	958	19	320	0	0	0	0	0	3
ENSG00000178104	PDE4DIP	72	92	100	115	67	46	97	101	63	97	41	133	54	0	48	35	65	14	32	13	13	0	0	1	11	59	136	0	0	494	0	75	0	0	0	0	0	3
ENSG00000269713	NBPF9	0	0	0	0	8	0	1	4	1	0	1	0	0	0	0	1	0	0	0	0	0	0	0	0	0	0	0	0	0	0	1	40	0	0	0	0	0	0
ENSG00000274019	AC239804.2	0	0	0	0	0	0	0	0	0	0	0	0	0	0	0	0	0	0	0	0	0	0	0	0	0	0	0	0	0	0	0	1	0	0	0	0	0	0
ENSG00000201699	RNU1-59P	0	0	6	0	0	5	0	0	0	0	1	0	0	0	0	3	0	0	0	0	0	0	0	0	0	0	0	0	0	0	0	0	0	0	0	0	0	0
ENSG00000274265	AC245297.3	2	7	15	9	5	12	2	9	2	2	3	1	0	1	1	0	3	0	0	0	0	0	0	0	1	0	16	0	3	2	5	5	0	0	0	0	0	0
ENSG00000271383	NBPF19	3	5	15	9	14	7	3	0	3	9	11	5	22	0	0	4	0	0	0	0	20	0	0	0	8	1	3	0	2	24	0	21	0	0	1	0	0	0
ENSG00000263464	PPIAL4C	0	0	0	0	0	0	1	0	0	0	0	0	0	0	0	0	0	0	0	0	0	0	0	0	0	0	0	0	0	0	0	0	0	0	0	0	0	0
ENSG00000277147	LINC00869	3	0	0	0	0	0	0	0	0	0	0	0	0	0	0	0	0	0	0	0	0	0	0	0	0	0	0	0	0	0	0	0	0	0	0	0	0	0
ENSG00000206828	U1	21	0	12	14	0	0	0	0	4	4	0	0	0	0	0	0	0	0	0	0	0	0	0	0	0	0	0	0	0	0	0	0	0	0	0	0	0	0
ENSG00000270882	HIST2H4A	0	0	0	0	0	0	0	0	0	0	0	0	1	0	0	0	0	0	0	0	0	0	0	0	0	0	0	0	0	0	0	0	0	0	0	0	0	0
ENSG00000203811	HIST2H3C	0	0	1	0	0	0	0	0	0	0	0	0	0	0	0	0	0	0	0	0	0	0	0	0	0	0	0	0	0	0	0	0	0	0	0	0	0	0
ENSG00000203812	HIST2H2AA3	0	1	0	1	0	0	0	2	5	0	0	1	0	1	0	8	0	0	0	0	0	0	0	0	0	0	0	0	0	1	1	13	0	0	0	0	0	0
ENSG00000220323	HIST2H2BD	0	0	1	0	0	0	0	0	0	0	0	0	0	0	0	0	0	0	0	0	0	0	0	0	0	0	0	0	0	0	0	0	0	0	0	0	0	0
ENSG00000261716	AC239868.2	17	9	0	12	11	0	3	5	5	11	8	7	0	0	0	0	0	66	0	0	0	0	0	0	0	1	0	0	5	0	0	0	0	0	0	0	0	0
ENSG00000272993	AC239868.4	7	4	2	15	10	0	8	18	6	9	9	20	0	0	0	0	0	0	0	0	0	0	0	0	0	0	0	0	0	35	0	1	0	0	0	0	0	0
ENSG00000203819	HIST2H2BC	0	0	0	0	0	0	0	0	0	1	0	0	0	0	0	0	0	0	0	0	0	0	0	0	0	0	0	0	0	0	0	0	0	0	0	0	0	0
ENSG00000272196	HIST2H2AA4	0	0	2	0	0	0	1	0	0	0	0	0	0	1	0	0	0	0	0	0	0	0	0	0	0	0	0	0	0	8	0	0	0	0	0	0	0	0
ENSG00000270276	HIST2H4B	0	0	2	0	0	0	0	0	1	0	0	0	0	0	0	0	0	0	0	0	0	0	0	0	0	0	0	0	0	0	0	0	0	0	0	0	0	0
ENSG00000184678	HIST2H2BE	1	0	4	19	0	0	19	12	17	33	16	33	0	0	0	0	182	0	0	0	0	0	0	0	49	1	0	0	0	0	0	149	0	0	0	0	0	0
ENSG00000178096	BOLA1	0	26	36	3	16	0	23	31	21	21	16	32	1	0	0	0	0	0	33	0	0	0	0	0	0	0	0	1	0	76	115	40	0	0	0	0	0	0
ENSG00000159164	SV2A	0	4	0	0	0	0	0	0	3	2	5	0	0	0	101	0	0	0	0	0	0	0	0	0	0	0	0	0	0	6	1	0	0	0	0	1	0	0
ENSG00000143368	SF3B4	59	41	47	109	20	18	60	115	131	142	84	72	71	1	1	28	0	152	31	1	46	0	1	0	263	5	133	0	121	492	30	246	0	1	0	0	0	0
ENSG00000014914	MTMR11	25	26	31	23	31	18	13	3	10	0	17	18	43	0	0	115	33	0	0	0	126	0	2	0	25	0	4	0	92	63	0	0	0	0	0	0	0	1
ENSG00000264522	OTUD7B	29	37	10	37	13	37	41	31	52	51	32	71	1	17	92	17	89	1	38	0	0	0	0	0	23	0	191	0	1	291	20	234	0	0	0	0	0	1
ENSG00000223945	AC244033.1	0	1	0	1	0	0	0	0	0	0	1	1	0	0	0	0	0	0	0	0	0	0	0	0	0	0	0	1	0	1	0	2	0	0	0	0	0	0
ENSG00000136631	VPS45	140	50	23	80	64	146	21	19	31	74	36	51	1	3	151	0	0	0	0	0	29	0	0	0	0	66	75	42	26	41	0	62	0	0	1	0	0	0
ENSG00000023902	PLEKHO1	7	31	39	37	30	17	3	1	4	8	3	3	1	0	0	9	4	0	30	6	0	23	0	0	1	0	34	28	0	36	25	13	0	0	1	0	0	0
ENSG00000143401	ANP32E	149	97	104	115	63	118	27	24	31	25	18	8	52	1	28	117	61	0	18	0	0	0	1	0	1	1	36	0	31	172	1	42	0	0	1	1	1	0
ENSG00000276110	AC242988.1	0	0	0	0	0	9	0	0	0	0	0	0	0	0	0	0	0	0	0	0	0	0	0	0	0	0	0	0	0	8	0	1	0	0	0	0	0	0
ENSG00000118298	CA14	0	0	0	0	0	0	0	0	0	0	0	0	0	0	0	0	0	0	0	0	63	0	0	0	1	0	0	0	0	2	0	0	0	0	0	0	0	0
ENSG00000117362	APH1A	549	370	498	452	560	431	415	371	471	676	490	436	6	53	134	283	306	99	298	24	91	113	75	20	195	112	423	0	77	2510	191	1453	1	12	1	1	0	56
ENSG00000118292	C1orf54	62	121	54	121	31	66	5	1	4	9	0	14	73	0	234	15	7	0	85	60	0	0	3	0	56	1	87	0	18	38	0	19	1	0	0	0	1	0
ENSG00000159208	CIART	0	0	0	10	0	0	2	2	0	2	2	0	0	0	0	56	0	0	20	0	0	0	0	0	0	0	0	0	0	0	0	0	0	0	0	0	0	0
ENSG00000266472	MRPS21	66	59	41	51	55	52	54	45	70	108	56	73	1	0	23	35	0	66	9	0	0	0	41	55	82	103	71	25	134	229	0	302	1	0	0	0	0	1
ENSG00000117360	PRPF3	52	56	60	30	8	33	52	32	38	52	46	67	0	1	0	2	116	0	0	0	0	1	105	38	79	3	53	0	23	332	1	578	0	42	1	1	0	1
ENSG00000163125	RPRD2	88	85	85	76	157	156	53	30	91	62	50	26	2	2	41	31	173	6	99	81	0	0	0	202	79	2	169	0	63	437	54	477	1	0	1	1	0	2
ENSG00000143374	TARS2	6	25	2	35	20	18	8	28	12	21	34	13	0	1	0	0	60	0	1	22	0	0	0	0	0	0	17	0	0	81	0	45	0	0	0	0	0	0
ENSG00000143369	ECM1	117	121	142	100	113	58	32	35	37	50	25	25	62	1	62	61	44	56	60	2	0	0	0	1	23	185	120	0	25	88	172	1	1	0	1	2	1	0
ENSG00000228126	FALEC	0	0	4	0	0	0	0	0	0	1	0	0	0	0	0	0	0	0	0	0	0	0	0	0	0	0	0	0	0	0	0	0	0	0	0	0	0	0
ENSG00000237781	AL356356.1	0	0	3	1	7	0	13	10	17	20	6	9	0	1	0	0	0	0	0	0	0	0	0	0	0	0	0	0	0	135	0	0	0	0	0	0	0	0
ENSG00000143382	ADAMTSL4	38	30	30	18	15	4	16	11	10	7	10	5	17	1	64	76	92	28	25	53	1	0	1	1	0	1	101	0	2	114	20	2	0	0	0	0	0	0
ENSG00000203804	ADAMTSL4-AS1	7	4	0	0	0	0	2	0	0	0	3	1	0	0	0	0	0	0	0	0	0	0	0	0	0	0	0	0	0	0	0	0	0	0	0	0	0	0
ENSG00000274963	RN7SL600P	0	0	0	0	0	0	0	0	0	0	0	8	0	0	0	0	0	0	0	0	0	0	0	0	0	0	0	0	0	0	0	0	0	0	0	0	0	0
ENSG00000143384	MCL1	445	532	475	493	672	507	165	202	220	290	179	258	187	165	707	1294	339	64	167	344	134	53	15	34	128	7	265	0	649	1446	218	704	1	0	1	1	0	1
ENSG00000143420	ENSA	87	159	107	129	149	160	251	163	222	313	197	248	87	37	40	46	93	0	21	15	134	12	64	0	104	172	147	29	84	1297	72	786	0	0	0	1	0	2
ENSG00000143457	GOLPH3L	77	12	44	84	17	114	30	51	46	53	24	21	0	17	48	0	0	0	0	0	0	0	0	0	99	0	0	0	0	144	70	244	1	0	0	0	1	0
ENSG00000143452	HORMAD1	0	7	0	0	0	0	0	0	0	0	0	0	0	0	0	0	0	0	0	0	0	0	0	0	0	0	0	0	0	0	0	0	0	0	0	0	0	0
ENSG00000163131	CTSS	1017	919	875	961	491	720	16	5	1	56	8	40	924	63	103	269	242	81	191	281	3	518	5	91	4	7	653	0	34	240	0	267	0	1	1	0	4	8
ENSG00000236713	AL356292.1	0	0	0	0	0	0	0	0	0	0	0	0	0	0	0	0	0	0	0	4	0	0	0	0	0	0	0	0	0	0	0	0	0	0	0	0	0	0
ENSG00000143387	CTSK	663	657	700	549	569	544	32	9	8	89	4	52	168	1	101	476	429	95	261	152	350	121	6	132	80	116	180	0	305	120	91	207	0	0	0	1	0	3
ENSG00000143437	ARNT	67	104	55	117	142	75	49	30	41	33	28	20	1	1	32	4	0	60	54	53	0	46	0	0	1	1	10	0	46	168	0	499	2	1	0	0	0	0
ENSG00000224800	RPS27AP6	7	8	13	14	20	11	2	3	7	8	2	5	0	10	0	4	15	0	0	0	7	0	1	0	2	1	20	0	39	17	0	3	0	0	0	0	0	0
ENSG00000143379	SETDB1	3	9	1	17	15	16	5	5	0	20	0	8	0	0	0	0	0	0	0	0	0	0	0	0	0	0	0	0	0	91	0	119	0	0	0	0	0	0
ENSG00000143418	CERS2	66	81	84	65	35	63	48	70	113	176	76	91	1	0	178	1	0	1	1	0	0	0	57	1	39	111	1	0	112	498	40	434	0	0	0	71	0	1
ENSG00000143412	ANXA9	0	0	0	0	0	0	17	25	37	7	12	17	0	0	0	0	0	0	0	0	0	0	0	0	0	0	0	0	0	37	0	0	0	0	0	0	0	0
ENSG00000143409	MINDY1	16	28	12	16	6	3	4	1	6	8	11	8	0	0	0	0	2	0	1	0	0	1	0	10	23	2	0	31	83	93	0	4	0	0	0	0	0	0
ENSG00000143363	PRUNE1	22	31	17	35	35	49	33	60	36	47	74	60	1	55	0	0	0	0	0	0	0	0	0	0	1	90	0	0	0	181	0	230	0	0	0	0	0	0
ENSG00000163141	BNIPL	0	0	0	11	0	1	3	13	11	13	4	21	0	0	0	0	0	0	0	0	0	0	0	0	0	0	0	0	62	0	0	69	1	0	0	0	0	0
ENSG00000143443	C1orf56	0	0	10	0	0	0	3	2	7	8	5	5	12	0	0	44	0	0	0	0	0	0	1	0	0	0	0	0	0	2	0	1	0	0	0	0	0	0
ENSG00000197622	CDC42SE1	158	263	240	229	285	149	187	116	158	175	115	172	45	124	210	112	56	113	140	4	16	1	28	16	39	88	461	0	41	481	269	689	1	3	1	0	0	4
ENSG00000213190	MLLT11	0	1	23	11	15	31	6	1	4	16	6	0	0	0	0	0	38	0	0	1	0	0	0	0	0	1	0	0	0	0	0	33	0	0	0	0	0	0
ENSG00000143458	GABPB2	3	30	7	28	57	23	16	20	22	12	22	21	1	1	0	33	0	0	1	0	85	0	0	0	1	0	28	0	42	135	2	30	0	0	0	0	0	0
ENSG00000233717	RPS29P29	0	0	0	0	0	0	0	0	0	0	0	0	0	0	0	0	0	0	0	0	0	0	0	6	11	0	0	0	0	0	0	0	0	0	0	0	0	0
ENSG00000143434	SEMA6C	0	0	3	0	0	0	3	0	1	9	0	0	0	0	0	0	9	0	0	0	6	0	0	0	0	0	0	0	1	0	0	19	0	0	0	0	0	0
ENSG00000163154	TNFAIP8L2	97	75	111	88	66	94	0	10	2	12	7	2	1	1	0	23	14	0	0	45	0	15	0	12	5	1	89	0	0	101	84	148	0	0	0	0	0	1
ENSG00000163156	SCNM1	68	26	54	47	74	0	27	20	14	16	26	28	0	2	0	0	0	0	45	0	0	0	0	0	0	0	18	0	0	192	0	0	0	0	0	0	0	0
ENSG00000163155	LYSMD1	0	28	10	31	0	0	16	9	9	18	16	7	0	0	0	0	0	0	0	0	1	0	1	0	0	0	54	0	0	58	0	239	1	0	0	0	0	1
ENSG00000163159	VPS72	18	7	29	24	21	3	52	35	31	27	32	22	0	65	15	0	0	0	10	0	16	0	0	0	17	1	1	0	49	218	0	265	1	0	0	0	0	0
ENSG00000143398	PIP5K1A	18	69	77	55	122	136	76	61	53	67	58	66	1	7	117	107	153	0	0	1	0	0	1	0	40	0	36	0	72	632	1	177	0	1	0	0	0	1
ENSG00000159352	PSMD4	134	185	145	116	148	132	101	72	143	152	100	130	3	87	67	3	14	1	0	32	1	0	118	0	112	77	52	0	190	668	181	419	0	1	0	1	1	0
ENSG00000232671	AL391069.2	0	0	0	0	0	0	0	0	0	0	1	0	0	0	0	0	0	0	0	0	0	0	0	1	0	0	0	0	0	0	0	2	0	0	0	0	0	0
ENSG00000143373	ZNF687	15	36	22	23	53	27	39	25	27	25	34	33	0	0	1	0	37	0	0	0	0	0	0	0	1	0	0	0	0	84	0	64	0	0	0	0	0	0
ENSG00000143393	PI4KB	25	82	47	84	51	97	79	42	44	91	48	49	2	1	0	7	0	8	24	0	0	0	0	0	30	0	49	0	0	287	1	131	0	0	0	0	0	0
ENSG00000265753	RN7SL444P	0	0	0	0	0	0	0	0	0	0	0	0	0	0	0	0	0	0	0	0	0	0	0	0	0	0	0	0	0	1	0	0	0	0	0	0	0	0
ENSG00000143390	RFX5	64	15	14	47	56	39	33	23	29	38	28	15	0	0	0	56	0	0	0	0	0	0	1	20	29	1	0	0	1	173	0	110	0	0	0	0	0	0
ENSG00000237976	AL391069.3	0	0	0	0	0	0	0	3	0	0	0	0	0	0	0	0	0	0	0	0	0	0	0	0	0	0	0	0	0	2	0	0	0	0	0	0	0	0
ENSG00000143416	SELENBP1	18	13	17	11	38	0	61	39	75	104	57	71	0	2	0	0	0	128	0	0	0	0	1	47	46	5	5	0	79	206	0	225	0	0	0	0	0	0
ENSG00000159377	PSMB4	8	1	9	73	0	32	33	2	21	16	5	3	0	0	0	0	0	0	0	171	1	0	1	0	0	0	0	0	108	155	1	113	0	0	0	0	0	0
ENSG00000143442	POGZ	121	170	92	135	106	5	88	80	71	116	78	121	1	98	14	0	109	0	26	1	0	2	1	0	30	4	195	20	244	301	323	168	1	1	0	0	0	2
ENSG00000143375	CGN	1	0	0	2	0	0	32	36	22	69	29	42	1	0	0	0	0	0	0	0	0	0	0	0	15	0	0	0	1	67	0	37	0	0	0	0	0	0
ENSG00000143367	TUFT1	1	0	0	1	8	12	64	38	31	52	36	16	1	0	76	215	0	0	0	0	0	0	1	0	0	0	1	0	0	218	0	256	0	0	0	0	0	0
ENSG00000223861	AL365436.1	1	2	0	7	0	2	9	0	3	1	5	0	0	1	12	0	0	0	0	0	2	0	0	0	0	0	1	0	0	58	2	24	0	0	0	0	0	0
ENSG00000143376	SNX27	101	84	153	95	147	94	30	53	37	59	30	32	1	0	10	116	0	32	0	0	0	0	0	40	38	0	167	21	22	137	110	259	0	0	1	0	0	0
ENSG00000159409	CELF3	0	0	0	0	0	0	0	0	0	4	0	0	0	0	0	0	0	0	0	0	0	0	0	0	0	0	0	0	0	0	0	0	0	0	0	0	0	0
ENSG00000178796	RIIAD1	0	0	0	0	0	0	1	9	0	0	0	4	0	0	0	0	0	0	0	0	0	0	0	0	0	0	0	0	0	0	0	0	0	0	0	0	0	0
ENSG00000143436	MRPL9	72	17	33	48	15	100	72	48	73	112	72	40	2	1	2	0	138	0	0	0	0	0	0	0	0	4	194	1	3	363	125	324	0	0	0	1	1	4
ENSG00000143450	OAZ3	17	9	0	6	0	0	16	37	27	38	12	7	0	0	0	24	0	0	0	0	0	0	0	0	0	1	37	0	0	69	0	63	0	0	0	0	0	0
ENSG00000182134	TDRKH	1	6	2	8	0	30	15	10	10	10	8	5	0	1	15	0	0	0	0	0	0	0	0	0	0	0	0	0	0	36	0	0	0	0	0	0	0	0
ENSG00000203288	TDRKH-AS1	0	0	0	1	0	0	3	0	0	0	3	0	0	0	0	0	0	0	0	0	0	0	0	0	0	0	0	0	0	0	0	0	0	0	0	0	0	0
ENSG00000269489	AL589765.6	0	0	17	0	0	0	0	8	2	0	0	0	0	0	0	0	0	0	0	0	0	0	0	0	0	0	0	0	0	0	0	0	0	0	0	0	0	0
ENSG00000213171	LINGO4	0	0	0	0	0	0	0	0	1	0	0	5	0	0	0	0	0	0	0	0	0	0	0	0	0	0	0	0	0	0	0	0	0	0	0	0	0	0
ENSG00000143365	RORC	0	0	0	0	0	0	4	0	8	0	1	0	0	0	0	0	0	0	0	0	0	0	0	0	0	0	0	0	0	0	0	0	0	0	0	0	0	0
ENSG00000225556	C2CD4D	0	0	0	0	0	0	0	7	9	3	0	0	0	0	0	0	0	0	0	0	0	0	0	0	0	0	0	0	0	0	0	0	0	0	0	1	0	0
ENSG00000159445	THEM4	0	20	25	39	21	66	19	16	19	24	21	5	0	0	0	0	0	0	0	1	0	0	0	7	0	1	0	0	7	20	0	81	0	0	0	0	0	1
ENSG00000197747	S100A10	690	704	940	807	649	650	415	202	425	434	342	367	96	171	1021	840	883	24	247	796	160	329	15	157	205	8	1654	2	180	1890	302	1168	3	2	0	3	2	16
ENSG00000229021	AL450992.1	0	0	0	0	0	0	0	0	0	0	1	0	0	0	0	0	0	0	0	0	0	0	0	0	0	0	0	0	0	0	0	33	0	0	0	0	0	0
ENSG00000163191	S100A11	279	236	186	207	151	178	143	83	141	251	102	147	264	71	131	135	2	45	55	0	0	115	0	14	314	23	177	98	1	1038	105	774	2	0	1	0	0	2
ENSG00000182898	TCHHL1	0	0	0	0	0	0	0	0	0	0	3	0	0	0	0	0	0	0	0	0	0	0	0	0	0	0	0	0	0	0	0	0	0	0	0	0	0	0
ENSG00000159450	TCHH	0	0	0	0	0	9	0	0	0	0	0	0	0	0	0	24	0	0	0	0	0	0	0	0	0	0	1	0	0	0	0	0	0	0	0	0	0	0
ENSG00000237975	FLG-AS1	1	0	0	0	0	0	0	0	0	0	0	0	0	0	0	0	0	0	0	0	0	0	0	0	0	0	0	0	0	0	0	0	0	0	0	0	0	0
ENSG00000183586	HMGN3P1	0	0	0	0	0	1	0	0	0	0	5	0	0	0	0	0	0	0	0	0	0	0	0	0	0	0	0	0	0	0	0	0	0	0	0	0	0	0
ENSG00000169509	CRCT1	0	0	0	0	0	0	0	0	0	0	0	0	0	0	0	241	0	0	0	0	0	0	2	0	0	0	0	0	0	0	0	0	0	0	0	0	0	0
ENSG00000163202	LCE3D	0	0	0	0	0	0	0	0	0	0	0	0	0	0	0	125	0	0	0	0	0	0	1	0	0	0	0	0	0	0	0	0	0	0	0	0	0	0
ENSG00000163207	IVL	0	0	0	0	0	0	1	2	12	16	6	0	0	0	0	0	0	0	0	0	0	0	0	0	0	0	0	0	0	1	0	0	0	0	0	0	0	0
ENSG00000224308	LINC01527	0	0	0	0	0	0	0	0	0	0	4	0	0	0	0	0	0	0	0	0	0	0	0	0	0	0	0	0	0	0	0	0	0	0	0	0	0	0
ENSG00000283227	SPRR5	0	0	0	0	0	0	1	0	0	0	0	0	0	0	0	107	0	0	0	0	0	0	0	0	0	0	0	0	0	0	0	0	0	0	0	0	0	0
ENSG00000163209	SPRR3	0	0	0	0	0	0	0	0	0	0	0	0	0	0	0	0	0	4	0	0	0	0	0	0	0	0	0	0	0	0	0	9	0	0	0	0	0	0
ENSG00000169469	SPRR1B	0	0	0	0	0	0	1	0	0	0	6	0	0	0	0	67	0	0	0	0	50	0	1	0	0	0	0	0	0	0	0	0	0	0	0	0	0	0
ENSG00000163216	SPRR2D	0	0	0	0	0	0	0	0	0	0	0	0	0	0	0	107	0	0	0	0	0	0	0	0	0	0	0	0	0	0	0	0	0	0	0	0	0	0
ENSG00000241794	SPRR2A	0	0	0	0	0	0	0	0	0	0	0	1	0	0	0	228	0	0	0	0	0	0	1	0	0	0	0	0	1	0	0	0	0	0	0	0	0	0
ENSG00000196805	SPRR2B	0	0	0	0	0	0	0	0	0	0	0	0	0	0	0	17	0	0	0	0	0	0	1	0	0	0	0	0	0	0	0	0	0	0	0	0	0	0
ENSG00000203785	SPRR2E	0	0	0	0	0	0	0	0	0	0	0	1	0	0	0	37	0	0	0	0	101	0	0	0	2	0	0	0	0	0	0	0	0	0	0	0	0	0
ENSG00000244094	SPRR2F	0	0	0	0	0	0	0	0	0	0	0	0	0	1	0	140	0	0	0	0	5	0	0	0	0	0	0	0	0	0	0	0	0	0	0	0	0	0
ENSG00000159516	SPRR2G	0	0	0	0	0	0	0	0	0	0	0	0	0	0	0	3	0	0	0	0	69	0	0	0	0	0	0	0	0	0	0	0	0	0	0	0	0	0
ENSG00000230779	AL161636.2	14	7	5	9	2	6	3	6	7	6	1	6	4	3	0	0	0	2	41	2	49	1	0	17	13	1	3	0	30	16	0	7	0	0	0	0	0	0
ENSG00000203782	LOR	1	0	0	0	0	0	0	0	0	1	0	1	0	0	0	0	0	0	0	0	0	0	0	0	2	0	0	0	0	0	0	0	0	0	0	0	0	0
ENSG00000163218	PGLYRP4	0	0	0	0	0	0	13	9	7	0	5	8	0	0	0	0	0	0	0	0	0	0	0	0	0	0	0	0	0	0	0	0	0	0	0	0	0	0
ENSG00000207321	RNU6-160P	0	0	0	0	0	0	0	0	1	0	0	0	0	0	0	0	0	0	0	0	0	0	0	0	0	0	0	0	0	0	0	0	0	0	0	0	0	0
ENSG00000163220	S100A9	8	33	77	66	67	56	568	526	456	1341	438	680	44	12	187	203	48	0	0	1	0	1	81	11	179	64	273	122	7	2144	70	2613	0	1	0	0	0	1
ENSG00000143546	S100A8	0	13	1	15	0	2	106	100	87	401	108	194	4	1	0	76	0	0	1	0	1	0	2	9	19	3	40	62	1	191	0	834	0	0	1	0	0	0
ENSG00000184330	S100A7A	0	0	0	1	0	0	38	11	14	173	41	87	0	0	0	32	0	0	0	0	62	0	1	0	2	0	0	0	0	90	0	10	0	0	0	0	2	0
ENSG00000143556	S100A7	0	0	2	0	0	0	135	58	77	148	31	113	0	0	0	276	0	0	0	0	70	1	2	1	170	1	0	1	0	279	0	84	2	0	0	0	0	1
ENSG00000197956	S100A6	2579	2383	2207	2080	2294	2014	3036	2080	2496	2313	2651	2209	640	445	1829	2275	2031	588	1140	1895	503	303	175	132	1562	706	2288	269	885	14813	1456	6974	3	5	8	7	34	24
ENSG00000196154	S100A4	96	96	35	47	25	20	5	1	10	17	4	10	61	1	34	90	235	0	1	1	0	0	1	87	1	0	1	0	2	11	2	19	0	0	0	2	0	0
ENSG00000188015	S100A3	0	10	4	0	6	0	0	0	0	1	6	0	0	0	0	0	0	0	0	0	0	0	0	0	0	0	0	0	0	0	0	0	0	0	0	0	0	0
ENSG00000196754	S100A2	0	0	0	0	0	0	15	4	3	21	15	2	0	0	0	0	0	0	0	0	0	0	0	0	0	0	0	0	0	47	0	38	0	0	0	0	0	0
ENSG00000188643	S100A16	146	100	118	76	87	134	594	408	661	436	591	559	84	14	99	1	43	52	46	0	0	0	1	26	269	295	143	0	298	3585	214	1277	0	5	3	0	0	4
ENSG00000189334	S100A14	2	9	11	26	1	3	1156	1095	1375	1067	1275	1168	7	30	2	1	1	1	1	3	0	0	52	6	461	204	51	2	69	6410	8	2627	3	4	1	2	1	3
ENSG00000189171	S100A13	1	5	31	5	82	24	17	0	10	15	6	22	0	0	0	1	0	0	0	0	7	0	0	0	0	0	1	0	1	2	0	0	0	0	0	0	0	0
ENSG00000160678	S100A1	7	26	32	30	71	19	3	7	0	25	4	5	0	0	54	41	102	16	0	4	39	0	0	0	0	0	81	0	0	0	0	38	0	0	0	1	0	0
ENSG00000272030	AL162258.2	0	0	0	0	0	0	5	0	1	0	0	0	0	0	0	0	0	0	0	0	0	0	0	0	1	0	0	0	0	58	0	0	0	0	0	0	0	0
ENSG00000160679	CHTOP	43	23	23	46	34	6	33	43	27	25	31	43	0	2	0	0	0	200	0	0	0	0	12	0	0	0	0	0	0	182	18	29	0	1	0	0	0	0
ENSG00000143553	SNAPIN	68	118	59	80	55	83	40	76	55	67	49	74	2	0	0	0	33	35	10	90	11	0	55	19	0	2	114	0	1	169	0	0	0	0	0	0	0	2
ENSG00000143621	ILF2	97	73	110	126	65	148	112	71	144	169	119	139	2	5	9	81	11	0	0	0	1	1	0	0	116	34	164	0	88	680	91	290	0	0	1	0	0	4
ENSG00000169418	NPR1	0	3	1	9	0	2	0	0	0	0	0	0	0	0	61	14	0	0	4	0	0	0	0	0	0	0	1	0	0	33	0	2	0	0	0	0	0	0
ENSG00000199565	Y_RNA	0	3	0	0	1	0	0	0	0	0	0	0	0	0	0	0	0	0	0	0	0	0	0	0	0	0	0	0	0	0	0	0	0	0	0	0	0	0
ENSG00000143624	INTS3	57	31	23	49	43	16	43	51	59	39	69	39	1	3	0	139	85	7	28	0	0	1	1	0	88	1	66	91	0	483	20	109	0	0	1	0	0	1
ENSG00000279767	AL513523.10	0	0	0	0	0	0	1	0	1	0	0	0	0	0	0	0	0	0	0	0	0	0	0	0	0	0	0	0	0	0	0	0	0	0	0	0	0	0
ENSG00000143554	SLC27A3	35	38	50	61	39	8	6	8	15	16	10	2	0	0	39	0	64	0	0	0	20	0	0	0	19	0	63	0	0	57	0	2	0	0	0	0	1	0
ENSG00000207039	Y_RNA	0	0	0	0	0	0	1	0	0	0	0	0	0	0	0	0	0	0	0	0	0	0	0	0	0	0	0	0	0	0	0	0	0	0	0	0	0	0
ENSG00000143614	GATAD2B	195	102	103	190	153	106	116	54	112	135	95	112	39	3	50	249	273	0	13	1	78	202	1	0	63	48	33	0	114	802	83	812	2	0	0	0	0	2
ENSG00000223599	AL513523.1	31	28	49	59	40	13	0	0	0	5	5	1	0	0	0	35	0	0	0	0	0	0	0	0	0	0	59	0	0	3	0	1	0	0	0	0	0	0
ENSG00000284738	AL358472.5	0	0	0	0	0	0	0	0	0	2	0	0	0	0	0	0	0	0	0	0	0	0	0	0	0	0	0	0	0	0	0	0	0	0	0	0	0	0
ENSG00000198837	DENND4B	77	142	121	79	94	128	47	54	28	36	30	21	1	3	0	0	124	147	0	1	100	1	0	22	199	0	139	0	1	235	129	84	0	0	1	0	0	1
ENSG00000160741	CRTC2	0	4	2	7	0	12	3	4	2	9	9	9	0	1	0	0	0	0	2	0	1	10	0	0	0	0	0	0	1	78	76	0	0	0	0	0	0	0
ENSG00000143570	SLC39A1	141	155	222	158	196	152	271	220	309	334	235	257	190	77	144	20	76	241	15	0	0	18	1	64	129	154	280	0	59	1912	44	500	1	3	0	1	0	4
ENSG00000282386	AL358472.4	10	6	1	0	0	24	2	0	6	6	4	8	0	0	0	0	0	0	29	0	0	0	0	0	0	0	0	0	2	14	0	47	0	0	0	0	0	0
ENSG00000273026	AL358472.3	0	2	2	3	0	0	0	1	0	2	5	0	0	0	0	2	4	0	0	0	0	0	0	0	1	0	0	0	0	6	0	11	0	0	0	0	0	0
ENSG00000143578	CREB3L4	5	10	8	11	0	20	192	161	190	320	134	182	0	4	0	28	0	0	0	0	0	0	0	0	1	203	38	18	115	413	33	360	0	3	0	0	0	0
ENSG00000143543	JTB	212	213	220	359	291	269	168	232	245	345	188	296	4	32	198	166	493	3	68	47	87	34	72	9	58	138	266	74	165	1595	34	966	0	1	1	3	0	3
ENSG00000272654	AL358472.2	7	0	0	0	0	8	5	0	1	0	3	0	0	0	0	0	0	0	0	0	0	0	0	0	0	0	0	0	0	0	0	0	0	0	0	0	0	0
ENSG00000143545	RAB13	223	224	242	230	234	270	96	69	123	162	151	122	237	14	168	23	1	46	49	29	20	39	1	0	80	1	246	1	170	540	233	357	1	0	1	2	0	1
ENSG00000177954	RPS27	0	0	0	0	0	0	0	0	0	0	0	0	0	0	0	0	0	0	0	0	0	0	0	0	0	0	0	0	0	2	0	1	0	0	0	0	0	0
ENSG00000231416	AL358472.1	0	0	2	0	0	0	1	0	0	1	0	0	0	0	0	0	0	1	0	0	0	0	0	0	0	0	0	0	0	1	0	0	0	0	0	0	0	0
ENSG00000231837	RPS7P2	0	3	0	0	1	2	1	0	1	0	0	1	0	0	0	0	0	0	0	0	0	0	0	0	0	0	0	0	0	6	0	0	0	0	0	0	0	0
ENSG00000143549	TPM3	119	166	188	210	120	75	88	85	128	154	119	105	3	6	132	111	73	2	95	46	1	62	1	29	92	40	438	110	82	560	55	529	1	2	1	1	0	2
ENSG00000143612	C1orf43	87	153	169	146	120	152	172	167	180	234	194	214	84	8	12	30	29	1	71	1	25	0	1	0	38	2	195	173	170	1174	0	636	0	1	0	34	1	1
ENSG00000143569	UBAP2L	181	92	118	134	161	80	112	83	138	154	143	107	3	2	84	1	343	112	99	0	12	1	0	45	29	189	101	0	132	532	104	545	0	0	91	1	0	1
ENSG00000143575	HAX1	53	96	63	134	71	30	91	145	140	114	125	111	122	15	152	35	111	54	69	2	49	1	1	9	53	1	154	0	84	537	1	413	0	0	0	2	0	0
ENSG00000143515	ATP8B2	97	54	102	72	107	81	5	3	8	19	10	13	1	2	127	246	61	1	0	0	0	48	4	0	42	1	94	0	20	150	68	1	0	0	0	0	0	1
ENSG00000237920	AL162591.1	0	0	0	0	0	0	0	0	0	0	0	0	0	1	0	0	0	0	0	0	0	0	0	0	0	0	0	0	0	40	0	0	0	0	0	0	0	0
ENSG00000226855	RPSAP17	0	0	1	0	0	1	0	0	1	0	0	1	0	0	0	1	1	0	0	0	0	0	10	0	0	0	0	0	0	3	0	3	0	0	0	0	0	0
ENSG00000228013	IL6R-AS1	0	11	0	4	6	0	0	0	0	0	0	0	0	5	0	0	0	0	0	0	0	0	0	0	0	0	0	0	0	1	0	0	0	0	0	0	0	0
ENSG00000160712	IL6R	44	90	86	62	110	66	5	6	13	27	6	13	43	1	0	69	16	0	14	0	36	0	1	28	31	0	212	2	23	127	67	167	0	1	0	0	0	1
ENSG00000228264	PSMD8P1	0	2	0	0	1	0	0	0	0	1	1	0	0	0	0	0	0	0	0	0	0	0	0	0	0	0	0	0	0	0	0	0	0	0	0	0	0	0
ENSG00000169291	SHE	4	20	21	3	49	13	2	0	0	3	2	0	0	0	0	0	41	6	76	0	0	0	0	0	0	0	0	0	1	0	0	0	0	0	0	0	0	0
ENSG00000163239	TDRD10	33	28	6	8	45	0	0	0	0	3	0	0	0	0	1	0	102	0	0	0	0	0	0	0	0	0	0	0	0	0	0	0	0	0	0	0	0	0
ENSG00000160714	UBE2Q1	150	144	92	119	69	83	44	64	81	128	69	98	2	30	80	193	201	0	39	170	1	0	1	1	5	3	226	2	200	382	30	368	0	1	1	0	0	2
ENSG00000160716	CHRNB2	0	0	0	0	0	0	0	2	0	0	0	0	0	0	0	0	0	0	0	0	0	0	0	0	0	0	0	0	0	0	0	0	0	0	0	0	0	0
ENSG00000160710	ADAR	177	268	299	200	159	188	214	174	219	346	223	274	156	44	104	282	175	56	71	68	68	50	92	0	72	104	96	1	452	1403	5	1189	0	3	0	0	0	0
ENSG00000143603	KCNN3	24	6	3	0	1	0	2	0	0	3	1	4	0	1	59	0	0	0	0	0	0	0	0	0	0	0	0	0	0	56	0	0	0	0	0	0	0	0
ENSG00000163344	PMVK	0	4	37	0	0	0	9	0	9	11	7	3	0	0	1	114	90	0	0	0	0	0	0	1	0	0	0	0	0	18	178	0	0	0	0	143	0	0
ENSG00000163346	PBXIP1	556	315	451	494	351	290	305	373	475	460	399	367	114	97	846	137	540	48	198	200	48	11	55	0	495	285	534	160	315	1276	348	1190	1	1	0	5	1	2
ENSG00000163348	PYGO2	9	49	59	30	33	30	55	72	47	64	63	50	0	23	81	29	36	8	0	0	56	0	0	0	16	2	112	0	46	275	1	155	0	1	0	1	0	0
ENSG00000271380	AL451085.2	0	0	0	9	0	18	2	0	2	3	0	0	0	0	0	0	0	0	0	0	0	0	0	0	0	0	0	0	0	0	0	57	0	0	0	0	0	0
ENSG00000160691	SHC1	20	31	11	28	33	41	57	9	31	64	42	25	0	1	49	17	1	0	0	1	0	0	4	20	0	19	6	3	48	117	0	162	1	0	0	0	0	0
ENSG00000173207	CKS1B	0	0	0	0	0	0	0	0	0	0	0	0	0	0	1	0	0	0	0	0	0	0	0	0	0	0	0	0	0	10	0	0	0	0	0	0	0	0
ENSG00000160688	FLAD1	6	20	10	9	16	12	23	21	23	33	20	30	0	1	0	31	0	0	0	0	0	0	1	0	0	0	9	0	1	57	0	44	0	0	0	0	0	0
ENSG00000163352	LENEP	0	0	0	0	0	0	0	0	0	0	0	3	0	0	0	0	0	0	0	0	0	0	0	0	0	0	0	0	0	0	0	0	0	0	0	0	0	0
ENSG00000160685	ZBTB7B	35	8	4	9	4	11	33	21	36	35	21	24	0	0	1	0	81	0	1	0	0	0	0	0	0	0	61	48	1	53	0	272	0	0	0	0	1	2
ENSG00000232093	DCST1-AS1	0	0	3	0	20	0	3	0	2	2	4	5	0	0	0	0	0	0	0	0	0	0	0	0	0	0	0	0	0	0	0	0	0	0	0	0	0	0
ENSG00000143537	ADAM15	58	54	49	62	26	47	137	203	141	246	183	204	0	7	166	86	72	0	0	0	0	22	0	0	175	125	9	115	48	696	41	274	1	0	0	0	0	1
ENSG00000243364	EFNA4	4	29	8	28	8	0	46	28	52	43	27	41	0	1	0	0	0	0	0	0	0	0	0	0	0	1	0	0	62	139	2	45	0	0	0	0	0	1
ENSG00000143590	EFNA3	0	10	0	1	0	0	20	11	27	33	17	27	1	1	0	0	0	0	0	0	0	0	0	0	0	36	0	0	0	170	0	169	0	0	0	1	0	0
ENSG00000202027	Y_RNA	0	0	0	0	0	0	0	0	0	1	0	0	0	0	0	0	0	0	0	0	0	0	0	0	0	0	0	0	0	0	0	0	0	0	0	0	0	0
ENSG00000169242	EFNA1	0	0	0	11	16	29	81	76	107	51	100	88	1	6	0	0	0	0	0	0	0	0	0	0	4	0	39	53	66	407	0	488	0	0	0	0	0	1
ENSG00000169241	SLC50A1	73	40	54	41	57	99	252	212	222	358	167	331	0	42	81	40	0	98	1	1	0	68	0	4	0	25	27	1	2	705	0	385	1	0	0	0	0	0
ENSG00000179085	DPM3	3	13	12	9	20	0	3	3	9	7	5	9	8	18	0	0	0	0	0	0	0	0	0	0	0	0	0	0	0	37	0	0	0	0	0	0	0	0
ENSG00000163463	KRTCAP2	0	0	0	0	0	0	0	0	4	0	0	0	0	0	1	0	0	0	0	0	0	0	0	0	0	0	0	0	0	21	0	0	0	0	0	0	0	0
ENSG00000163462	TRIM46	0	0	1	2	0	9	6	14	7	9	7	6	0	0	0	0	0	0	6	0	0	0	0	0	7	0	2	0	0	3	0	58	0	0	0	0	0	0
ENSG00000185499	MUC1	1	2	17	21	0	3	311	375	319	469	313	398	6	1	0	0	2	0	48	1	45	38	1	0	188	22	6	18	240	1550	72	1320	0	1	0	0	2	1
ENSG00000231064	AC234582.1	0	0	0	0	0	0	0	1	3	4	1	12	0	0	0	0	0	0	0	0	0	0	0	0	0	0	0	0	0	0	0	0	0	0	0	0	0	0
ENSG00000169231	THBS3	49	45	53	52	118	15	11	14	19	11	9	13	0	0	38	0	1	0	0	0	206	0	0	0	0	0	1	0	0	159	0	3	0	0	0	0	0	0
ENSG00000160766	GBAP1	23	18	23	21	50	22	13	27	13	31	34	23	2	0	1	0	0	0	0	0	0	0	0	0	0	0	50	0	0	185	0	111	0	2	0	0	0	0
ENSG00000177628	GBA	6	3	3	6	7	6	5	6	8	5	9	8	0	0	0	0	0	0	0	0	0	0	0	0	0	0	10	0	0	17	0	22	0	0	0	0	0	0
ENSG00000160767	FAM189B	22	28	43	32	57	4	51	59	70	64	66	67	1	2	80	101	30	0	0	0	74	0	1	21	33	2	47	3	18	261	0	219	0	2	0	1	0	1
ENSG00000116521	SCAMP3	25	39	36	87	52	17	50	31	71	62	43	73	1	1	0	0	0	52	56	1	29	0	0	0	0	78	6	0	33	322	57	62	1	0	0	0	0	0
ENSG00000176444	CLK2	52	24	12	47	57	54	14	18	11	36	28	21	0	0	85	24	0	0	0	0	0	0	0	60	2	23	25	0	11	140	1	208	0	1	0	0	0	0
ENSG00000143630	HCN3	1	0	0	0	0	35	1	0	0	0	4	3	0	0	0	0	0	0	0	0	0	0	0	0	33	0	0	0	0	0	0	0	0	0	0	0	0	0
ENSG00000160752	FDPS	0	0	1	2	0	10	3	0	0	6	8	1	0	0	0	0	0	0	0	0	0	0	8	0	1	0	9	0	1	5	0	0	0	0	0	0	0	1
ENSG00000225855	RUSC1-AS1	0	1	0	0	1	0	6	4	4	0	15	0	0	1	0	0	116	0	0	0	0	0	0	0	0	0	0	0	0	59	0	125	1	0	0	0	0	0
ENSG00000160753	RUSC1	34	35	63	58	16	0	69	89	72	90	97	98	0	1	0	0	0	0	1	0	204	71	0	31	50	0	1	0	0	610	0	100	0	1	1	0	0	0
ENSG00000116539	ASH1L	124	166	131	144	119	92	121	49	126	173	123	161	14	35	59	126	99	24	61	9	30	66	1	0	59	5	273	0	85	631	40	892	0	1	0	0	0	2
ENSG00000207144	RNU6-1297P	0	0	0	0	0	0	0	0	1	0	0	0	0	0	0	1	0	0	0	0	0	0	0	0	0	0	0	0	0	14	0	0	0	0	0	0	0	0
ENSG00000235919	ASH1L-AS1	4	0	1	4	23	0	5	0	1	0	3	0	0	0	0	0	0	0	0	0	0	0	0	0	0	0	0	0	0	0	0	0	0	0	0	0	0	0
ENSG00000125459	MSTO1	1	9	2	13	12	13	10	10	15	18	16	14	43	0	0	0	15	0	0	0	0	0	5	4	88	0	27	0	0	32	0	143	0	0	0	0	0	0
ENSG00000246203	AL353807.3	0	0	9	0	0	0	5	1	0	2	0	0	0	0	0	0	0	0	0	0	0	0	0	0	0	0	0	0	0	1	0	0	0	0	0	0	0	0
ENSG00000163374	YY1AP1	10	42	27	35	25	4	14	8	11	32	18	15	0	0	0	43	0	0	0	0	0	4	0	0	51	0	0	0	83	24	0	297	0	0	0	0	0	0
ENSG00000132676	DAP3	2	10	12	6	5	20	14	1	10	12	10	22	0	1	0	134	0	0	0	1	0	0	62	0	0	81	76	0	0	73	120	44	0	0	0	0	0	0
ENSG00000203761	MSTO2P	7	2	0	7	0	0	0	0	3	6	1	2	158	0	0	0	0	0	0	0	0	0	0	0	0	1	0	0	0	0	0	1	0	0	0	0	0	0
ENSG00000116580	GON4L	40	43	47	39	26	71	36	15	50	45	55	48	42	28	1	56	36	14	0	0	0	0	0	0	40	20	3	0	0	345	42	259	0	1	0	0	1	0
ENSG00000132718	SYT11	23	14	32	47	2	38	2	2	3	5	1	11	0	0	0	0	0	0	0	0	0	0	0	26	10	0	30	0	0	23	0	127	1	1	0	0	0	0
ENSG00000143622	RIT1	170	39	64	93	69	77	34	76	96	52	61	64	1	73	0	29	38	0	66	1	64	34	1	0	0	32	104	0	0	392	98	37	0	0	0	0	0	0
ENSG00000132680	KHDC4	27	58	65	50	19	13	53	62	54	83	60	58	2	3	205	69	128	0	0	1	1	0	83	12	126	2	20	0	11	299	245	886	0	0	0	0	0	0
ENSG00000207475	SNORA80E	0	0	0	0	0	0	0	0	4	0	0	0	0	0	0	0	0	0	0	0	0	0	0	0	0	0	0	0	0	0	0	0	0	0	0	0	0	0
ENSG00000116584	ARHGEF2	84	80	87	90	62	44	48	69	67	75	52	69	5	15	69	62	101	50	70	0	67	1	0	1	0	1	94	3	64	266	142	327	0	0	1	0	0	0
ENSG00000163479	SSR2	551	499	480	526	479	456	462	501	500	589	464	566	32	32	253	189	134	86	177	42	167	1	75	86	676	105	576	17	453	2754	149	1676	1	1	2	2	2	6
ENSG00000160803	UBQLN4	0	0	0	3	1	0	6	0	11	5	4	5	0	2	0	1	0	0	1	0	0	0	0	0	0	2	0	0	102	50	0	0	0	0	0	0	0	0
ENSG00000116586	LAMTOR2	125	159	101	203	193	175	121	141	151	170	107	151	45	4	37	6	107	0	0	0	26	1	20	0	2	22	101	0	23	738	31	277	0	1	0	0	0	3
ENSG00000132698	RAB25	0	2	2	3	0	0	97	61	77	79	80	90	0	3	0	2	0	0	1	2	0	0	0	0	17	2	0	0	0	509	1	417	1	0	0	0	0	110
ENSG00000254726	MEX3A	1	8	6	1	0	0	37	30	43	28	31	31	1	2	0	0	0	0	0	0	0	0	0	0	61	0	15	0	0	104	0	164	0	0	0	0	0	1
ENSG00000160789	LMNA	443	306	380	398	450	280	493	384	478	399	336	407	225	326	593	524	405	172	461	304	313	126	23	40	125	100	189	25	300	2283	244	1054	0	2	0	2	2	2
ENSG00000196189	SEMA4A	36	5	6	6	0	34	13	4	7	10	3	9	0	0	0	0	0	0	0	0	0	0	0	0	0	0	0	0	0	50	0	0	0	0	0	0	0	0
ENSG00000252236	SNORA26	0	0	0	0	0	0	0	0	0	2	0	0	0	0	0	0	0	0	0	0	0	0	0	0	0	0	0	0	0	0	0	0	0	0	0	0	0	0
ENSG00000160785	SLC25A44	8	23	44	84	44	1	45	29	42	37	53	46	1	1	187	17	0	0	53	6	0	0	1	0	65	1	129	60	46	133	0	117	1	0	0	0	0	0
ENSG00000160783	PMF1	23	27	36	22	17	17	23	22	16	12	28	7	0	2	160	0	0	0	38	45	0	0	0	33	0	0	54	0	1	40	0	0	0	0	0	0	0	0
ENSG00000160781	PAQR6	7	4	5	12	10	17	5	4	2	5	9	9	0	0	0	0	0	0	0	0	0	0	0	0	0	0	0	0	0	0	0	13	0	0	0	0	0	0
ENSG00000198952	SMG5	55	65	39	22	29	50	97	57	96	100	110	102	1	1	32	27	43	0	23	79	0	52	3	0	15	1	0	0	37	331	61	304	0	0	0	0	0	1
ENSG00000163472	TMEM79	2	0	1	1	1	0	6	17	12	4	17	8	0	1	0	25	0	0	8	0	0	0	0	0	3	13	0	0	0	108	0	2	0	0	0	0	0	1
ENSG00000198715	GLMP	99	50	70	113	76	64	10	9	11	9	6	15	0	1	0	71	0	0	0	0	0	0	0	0	0	0	0	0	0	71	6	12	0	0	1	0	0	0
ENSG00000163468	CCT3	73	105	50	58	97	29	90	92	143	199	111	139	0	3	42	171	92	25	0	0	1	2	3	6	192	54	128	0	219	699	0	388	1	0	0	0	0	3
ENSG00000163467	TSACC	0	0	0	0	0	0	0	0	0	0	0	1	0	0	0	0	0	0	0	0	0	0	0	0	0	0	0	0	0	0	0	0	0	0	0	0	0	0
ENSG00000132677	RHBG	0	0	0	0	0	0	0	0	4	0	0	0	0	0	0	0	0	0	0	0	0	0	0	0	0	0	0	0	0	0	0	0	0	0	0	0	0	0
ENSG00000125462	C1orf61	0	0	0	6	0	0	0	0	0	3	0	0	0	0	0	0	0	0	0	0	0	0	0	0	0	0	0	0	0	1	0	0	0	0	0	0	0	0
ENSG00000236947	AL139412.1	0	0	0	0	0	0	1	0	0	0	0	0	0	0	0	0	0	95	0	0	0	0	0	0	0	0	0	0	0	51	0	0	0	0	0	0	1	0
ENSG00000116604	MEF2D	39	116	119	79	12	170	85	69	104	101	87	85	295	2	0	178	0	0	47	0	2	0	1	0	78	0	119	0	272	276	36	431	0	2	0	0	1	0
ENSG00000206651	Y_RNA	0	8	0	0	0	0	0	0	0	1	4	0	0	0	0	0	0	0	0	0	0	0	1	0	0	1	0	0	0	9	18	0	0	0	0	0	0	0
ENSG00000183856	IQGAP3	0	0	0	0	0	0	4	8	7	2	3	2	0	0	0	0	0	0	0	0	0	0	0	0	0	0	0	0	0	84	1	32	0	0	0	0	0	0
ENSG00000163382	NAXE	34	64	22	26	39	10	87	59	76	58	57	65	1	0	0	0	0	0	0	0	71	0	15	0	1	0	14	0	2	221	0	169	0	0	0	0	0	0
ENSG00000160818	GPATCH4	24	13	19	19	21	48	18	41	39	33	48	37	0	0	1	0	0	0	0	0	0	0	0	0	0	1	13	0	0	274	0	155	0	0	0	0	0	0
ENSG00000132702	HAPLN2	0	0	0	0	0	0	1	0	0	0	4	0	0	0	0	0	0	0	0	0	0	0	0	0	0	0	0	0	0	0	0	0	0	0	0	0	0	0
ENSG00000272068	AL365181.2	0	0	2	0	0	0	2	0	0	0	2	0	0	0	0	0	0	0	0	0	0	0	0	0	0	0	0	0	0	0	0	0	0	0	0	0	0	0
ENSG00000132692	BCAN	0	0	3	0	0	0	0	0	0	0	2	0	0	0	0	0	0	0	0	0	0	0	0	0	0	0	0	0	0	0	0	0	0	0	0	0	0	0
ENSG00000272405	AL365181.3	0	2	2	1	46	0	0	0	0	0	0	0	0	0	0	0	0	0	0	0	0	0	0	0	0	0	0	0	0	0	0	0	0	0	0	0	0	0
ENSG00000132688	NES	5	4	17	10	27	34	6	6	12	10	24	4	0	2	0	42	133	0	1	1	357	0	1	1	0	0	0	16	82	64	0	8	0	0	0	1	0	0
ENSG00000237588	AL590666.3	0	2	0	0	0	0	0	0	0	0	0	0	0	0	0	0	0	0	0	0	0	0	0	0	0	0	0	0	1	0	0	0	0	0	0	0	0	0
ENSG00000143320	CRABP2	17	98	56	81	127	8	318	175	353	254	246	209	4	6	0	171	103	0	0	141	1	3	5	0	255	134	27	1	27	2043	172	1826	1	0	1	0	1	2
ENSG00000143319	ISG20L2	13	12	56	20	44	0	28	4	23	39	40	10	1	0	0	0	0	0	0	0	21	0	0	31	0	33	2	0	52	193	0	40	0	0	0	1	0	0
ENSG00000143303	RRNAD1	13	32	8	7	1	0	0	5	6	7	11	12	0	0	0	0	0	0	0	0	0	0	0	0	107	0	0	0	0	34	0	0	0	0	0	0	0	0
ENSG00000143314	MRPL24	31	46	16	31	50	53	50	23	52	69	40	54	1	2	29	0	0	0	0	0	1	0	6	41	0	0	65	0	1	241	1	172	0	0	0	0	0	0
ENSG00000143321	HDGF	34	34	82	58	41	17	107	109	92	122	98	84	1	2	145	120	0	0	0	73	0	100	2	37	24	3	37	0	255	421	0	673	0	1	0	0	0	2
ENSG00000143294	PRCC	85	54	57	94	66	55	52	63	64	101	66	87	0	0	0	22	0	0	6	33	0	0	101	0	73	2	39	3	108	308	0	255	0	0	0	0	0	0
ENSG00000027869	SH2D2A	7	23	4	14	0	6	4	8	0	8	0	7	0	0	0	31	0	0	0	0	0	0	0	0	0	0	45	0	0	0	26	0	0	0	0	0	0	1
ENSG00000198400	NTRK1	0	0	0	0	0	0	0	0	0	0	0	0	0	0	0	0	0	0	0	0	0	0	0	0	0	0	13	0	0	0	0	0	0	0	0	0	0	0
ENSG00000027644	INSRR	0	0	0	3	0	0	0	0	0	0	0	0	0	0	0	0	0	0	0	0	0	0	0	0	0	0	0	0	0	0	0	0	0	0	0	0	0	0
ENSG00000187800	PEAR1	18	8	19	3	20	32	4	0	1	3	1	0	0	0	0	0	0	0	0	0	0	0	0	0	0	0	17	0	0	15	67	95	0	0	0	0	0	0
ENSG00000132694	ARHGEF11	55	83	80	46	88	53	35	32	22	44	55	18	16	1	18	16	168	7	3	1	0	107	9	1	43	27	101	4	171	266	65	73	0	0	0	0	0	2
ENSG00000266160	RN7SL612P	0	0	7	1	0	0	0	1	2	1	0	5	0	0	0	0	0	0	0	0	0	0	0	0	0	0	0	0	0	1	0	12	0	0	0	0	0	0
ENSG00000237842	AL157713.1	0	11	0	0	8	2	0	0	0	0	0	0	0	0	0	0	0	0	0	0	0	0	0	0	0	0	0	0	0	0	0	0	0	0	0	0	0	0
ENSG00000224520	KRT8P45	0	0	0	0	0	0	4	0	1	4	0	0	0	1	0	0	0	0	0	0	0	0	0	0	0	2	0	0	0	53	18	0	0	0	0	0	0	0
ENSG00000117036	ETV3	48	22	50	13	17	1	13	16	35	30	26	41	1	0	0	0	94	0	0	1	0	0	0	0	78	0	0	19	0	213	112	38	1	0	0	0	0	0
ENSG00000229961	AL357143.1	0	0	0	0	0	0	0	0	0	5	0	0	0	0	0	0	0	0	0	0	0	0	0	0	0	0	0	0	0	0	0	0	0	0	0	0	0	0
ENSG00000143297	FCRL5	46	144	105	140	205	106	5	3	2	27	9	6	5	0	13	0	0	9	1	0	0	0	0	0	67	2	3	0	101	41	298	40	0	0	0	0	0	0
ENSG00000163518	FCRL4	0	0	0	0	0	0	0	0	0	4	0	0	0	0	0	0	0	0	0	0	0	0	0	0	0	0	0	0	0	18	0	0	0	0	0	0	0	0
ENSG00000236731	AL135929.2	4	0	0	0	0	0	0	0	0	0	0	0	0	0	0	0	0	0	0	0	0	0	0	0	0	0	0	0	0	0	0	0	0	0	0	0	0	0
ENSG00000160856	FCRL3	0	10	0	1	0	11	0	0	0	0	0	5	0	0	0	0	0	0	92	0	0	0	0	0	90	0	0	0	0	0	0	1	0	0	0	0	0	0
ENSG00000231700	AL356276.2	0	6	1	0	3	8	0	0	0	1	0	0	0	0	0	0	0	0	0	0	0	0	0	0	0	0	0	0	0	1	0	0	0	0	0	5	0	0
ENSG00000132704	FCRL2	0	3	0	0	8	0	0	0	4	1	0	0	0	0	0	0	0	0	0	0	0	0	0	0	69	0	0	0	0	0	0	0	0	0	0	0	0	0
ENSG00000073754	CD5L	0	0	0	12	0	0	0	0	0	0	0	0	0	0	0	0	0	0	0	0	0	0	0	0	0	0	0	0	0	57	0	0	0	0	0	0	0	0
ENSG00000227425	MRPS21P2	0	1	0	0	0	0	0	0	1	0	0	0	0	0	0	0	0	0	0	0	0	0	0	0	0	0	0	0	0	0	1	0	0	0	0	0	0	0
ENSG00000183853	KIRREL1	9	18	25	20	28	38	10	2	2	0	0	6	0	79	72	8	0	0	0	0	0	0	0	0	0	1	16	0	142	41	47	0	0	0	0	0	0	0
ENSG00000226520	KIRREL1-IT1	0	1	0	0	0	0	0	0	0	0	0	0	0	0	0	0	0	0	0	0	0	0	0	0	0	0	0	0	0	0	0	0	0	0	0	0	0	0
ENSG00000227295	ELL2P1	62	35	44	49	57	19	9	14	22	23	28	34	0	0	0	0	0	0	0	0	0	0	0	0	2	2	26	0	94	108	0	90	0	0	0	0	0	0
ENSG00000158473	CD1D	2	19	15	19	21	22	3	0	0	1	0	0	0	0	0	0	0	0	0	0	0	0	0	0	0	0	20	0	0	0	0	0	0	0	0	0	0	0
ENSG00000229914	AL138899.2	0	0	0	0	0	0	0	0	0	0	0	0	0	0	0	0	0	0	0	0	0	0	0	0	0	0	0	0	0	2	0	0	0	0	0	0	0	0
ENSG00000176320	AL138899.1	0	0	0	0	0	0	0	0	0	0	0	0	0	0	0	0	0	0	0	0	0	0	0	43	0	0	0	0	0	0	0	0	0	0	0	0	0	0
ENSG00000158477	CD1A	0	0	0	0	0	0	0	0	0	0	4	0	0	0	0	0	0	0	0	0	0	0	0	0	65	0	0	18	39	32	0	107	0	0	0	0	0	0
ENSG00000158481	CD1C	8	0	0	0	0	0	0	0	0	0	0	2	0	0	0	0	0	0	0	0	0	0	0	1	0	0	8	0	0	7	0	7	0	0	0	0	0	0
ENSG00000158485	CD1B	0	0	0	0	0	37	8	0	0	0	0	0	0	0	0	0	0	0	0	0	0	0	0	0	0	0	0	0	0	18	0	0	0	0	0	0	0	0
ENSG00000158488	CD1E	20	2	0	0	0	0	2	0	0	7	5	3	0	0	0	0	0	0	0	0	0	0	0	0	0	0	0	0	0	0	0	0	0	0	0	0	0	0
ENSG00000180708	OR10K2	0	0	0	0	0	0	0	0	1	0	0	0	0	0	0	0	0	0	0	0	0	0	0	0	0	0	0	0	0	0	0	0	0	0	0	0	0	0
ENSG00000231434	AL365440.1	76	197	116	214	232	90	129	96	97	215	115	156	8	7	61	49	20	6	38	71	73	2	0	0	116	26	222	39	45	654	35	441	0	0	0	0	0	3
ENSG00000197532	OR6Y1	0	0	0	0	0	0	0	0	0	3	0	0	0	0	0	0	0	0	0	0	0	0	0	0	0	0	0	0	0	0	0	0	0	0	0	0	0	0
ENSG00000163554	SPTA1	0	2	14	0	0	27	0	0	2	0	1	0	0	0	0	0	0	0	0	0	0	0	0	0	0	0	0	0	0	0	0	0	0	0	0	0	0	0
ENSG00000197403	OR6N1	0	0	0	0	0	0	0	0	0	0	0	0	0	0	0	0	0	0	0	0	0	0	0	0	0	0	0	0	0	0	0	1	0	0	0	0	0	0
ENSG00000163563	MNDA	32	72	41	84	50	86	7	6	3	9	0	9	1	1	0	0	0	0	0	0	55	1	0	0	57	1	39	0	0	39	0	0	0	0	0	0	0	0
ENSG00000163564	PYHIN1	33	11	8	6	10	30	0	0	1	4	0	1	124	0	0	0	0	6	0	0	0	0	0	0	0	0	0	0	56	16	24	87	0	0	0	0	1	0
ENSG00000163565	IFI16	258	338	286	279	255	353	16	26	36	74	19	43	153	2	135	198	1	105	137	12	94	0	3	48	76	1	426	0	252	351	166	142	0	1	1	0	0	2
ENSG00000163568	AIM2	0	11	0	0	0	0	1	0	0	1	0	0	0	0	0	0	0	0	0	0	0	0	0	0	0	0	0	0	0	48	0	0	0	0	0	0	0	0
ENSG00000233473	RAD1P2	0	0	4	0	6	0	0	0	0	0	0	0	0	0	0	0	0	0	0	0	0	0	0	0	0	0	0	0	0	0	0	0	0	0	0	0	0	0
ENSG00000162706	CADM3	34	6	15	13	0	25	1	0	0	0	0	3	0	16	37	125	0	0	0	0	0	0	1	17	0	0	0	0	0	0	0	57	0	0	0	0	0	0
ENSG00000225670	CADM3-AS1	0	0	0	0	0	8	0	5	0	2	0	0	0	0	0	8	0	0	0	0	0	0	0	0	0	0	0	0	0	0	0	0	0	0	0	0	0	0
ENSG00000213088	ACKR1	2	0	1	6	1	0	0	0	0	0	0	0	18	5	6	0	0	0	17	0	0	0	0	0	0	0	3	0	2	6	0	8	0	0	0	0	0	0
ENSG00000179639	FCER1A	0	0	0	0	0	0	0	0	0	2	0	0	0	0	0	1	0	0	0	0	0	0	0	0	0	0	0	0	0	0	0	0	0	0	0	0	0	0
ENSG00000235226	AL445528.1	2	1	3	1	2	3	0	0	1	0	0	2	0	0	0	0	0	0	1	0	0	0	0	0	4	0	7	0	11	1	2	0	0	2	0	0	0	0
ENSG00000158716	DUSP23	31	139	93	80	113	64	47	71	54	90	77	96	1	2	0	92	95	0	43	43	0	40	1	0	26	54	99	28	121	265	27	398	0	0	0	0	0	2
ENSG00000181036	FCRL6	0	6	0	0	0	0	0	0	0	0	0	0	0	0	0	0	0	0	0	0	2	0	0	0	0	0	0	0	0	0	0	0	0	0	0	0	0	0
ENSG00000158714	SLAMF8	3	17	88	24	76	0	0	5	0	1	3	3	0	0	0	0	0	0	0	0	0	0	0	0	1	0	0	0	0	1	0	0	0	0	0	0	0	0
ENSG00000188004	SNHG28	20	2	0	1	1	20	10	0	0	0	3	3	0	0	0	0	0	0	0	0	0	0	0	0	0	0	0	0	0	0	0	40	0	0	0	0	0	0
ENSG00000212161	SNORD64	2	0	0	0	0	0	0	0	0	0	2	0	0	0	0	0	0	0	0	0	0	0	0	0	0	0	0	0	0	0	0	0	0	0	0	0	0	0
ENSG00000243284	VSIG8	0	0	0	0	0	0	0	0	0	0	0	0	0	0	0	0	0	0	0	0	0	0	0	0	0	0	0	0	0	1	0	0	0	0	0	0	0	0
ENSG00000272668	AL590560.2	13	0	21	35	0	0	0	4	7	18	2	7	0	0	0	0	0	0	0	0	0	0	0	0	1	0	0	0	0	0	0	86	0	0	0	0	0	0
ENSG00000213085	CFAP45	0	0	5	0	0	0	1	11	1	23	7	19	0	0	0	0	0	0	0	0	0	0	0	0	0	0	0	0	0	0	0	0	0	0	0	0	0	0
ENSG00000158710	TAGLN2	636	556	624	560	913	595	560	545	702	817	559	591	425	230	545	753	511	204	423	338	134	93	75	1	249	106	924	118	395	3932	110	1691	0	5	0	1	1	10
ENSG00000085552	IGSF9	0	1	0	0	0	0	26	38	24	41	39	26	0	1	0	0	0	0	0	0	0	0	27	0	0	1	0	0	0	58	0	63	0	0	0	0	0	0
ENSG00000162723	SLAMF9	0	5	7	10	3	11	0	0	4	0	0	0	0	0	0	0	0	0	0	0	0	0	0	0	0	0	0	0	0	0	0	0	0	0	0	0	0	0
ENSG00000224259	LINC01133	0	39	9	2	0	0	6	5	2	3	0	2	0	0	0	0	0	0	1	0	0	0	0	0	0	0	0	0	0	0	0	0	0	0	0	0	0	0
ENSG00000177807	KCNJ10	0	0	0	10	0	0	0	0	0	0	0	0	0	0	0	0	0	0	0	0	0	0	0	0	0	0	0	0	0	0	0	0	0	0	0	0	0	0
ENSG00000237409	AL513302.1	6	5	22	16	6	7	3	2	2	1	9	3	0	0	0	0	0	0	0	0	0	0	0	0	0	0	2	0	0	7	0	1	0	0	0	0	0	0
ENSG00000260766	AL513302.2	0	6	1	0	3	17	10	13	4	1	9	27	0	0	0	0	100	0	0	0	2	0	0	9	0	0	0	0	0	0	0	16	0	0	0	0	0	0
ENSG00000143315	PIGM	80	33	11	16	21	15	39	30	18	39	17	43	115	0	0	1	0	15	142	1	0	1	0	0	0	2	61	7	140	236	0	187	0	0	0	0	0	0
ENSG00000162728	KCNJ9	0	0	0	0	0	0	0	0	0	0	0	0	0	0	0	0	0	18	0	0	0	0	0	0	0	0	0	0	0	1	0	0	0	0	0	0	0	0
ENSG00000162729	IGSF8	24	38	25	29	109	28	92	84	112	176	70	116	124	3	144	0	0	0	0	0	0	0	0	1	9	6	1	0	46	547	0	297	0	1	1	1	1	0
ENSG00000018625	ATP1A2	0	0	1	0	0	0	0	0	0	0	0	0	0	0	0	0	0	0	0	0	0	0	0	0	0	0	0	28	0	0	0	0	0	0	0	0	0	0
ENSG00000132681	ATP1A4	0	0	0	0	0	0	0	3	0	0	10	2	0	0	0	0	0	0	0	0	0	0	0	0	0	0	0	0	0	111	0	0	0	0	0	0	0	0
ENSG00000143318	CASQ1	1	0	1	0	0	0	0	0	0	0	0	6	0	0	0	0	0	0	0	0	0	0	0	0	0	0	0	0	0	0	0	0	0	0	0	0	0	0
ENSG00000162734	PEA15	139	173	160	153	158	134	104	93	127	104	76	132	68	4	26	281	148	65	121	43	0	0	32	6	47	2	366	78	68	379	90	264	0	0	0	1	0	2
ENSG00000132716	DCAF8	76	85	87	96	178	51	71	71	123	117	63	99	0	1	88	88	173	0	194	0	0	1	0	0	0	1	65	5	15	492	29	160	0	0	0	0	0	0
ENSG00000258465	AL139011.2	0	0	0	1	0	0	0	0	0	0	0	0	0	0	0	0	0	0	0	0	0	0	0	0	0	0	0	0	0	0	0	0	0	0	0	0	0	0
ENSG00000224261	RPSAP18	0	0	1	1	1	0	1	0	2	0	0	1	0	0	0	0	0	0	0	0	0	0	0	0	0	2	0	0	0	27	0	0	0	0	0	0	0	0
ENSG00000162735	PEX19	22	60	53	57	46	23	33	10	36	92	29	17	0	1	112	0	1	0	108	0	0	0	0	1	0	0	116	1	0	110	82	323	1	0	0	0	0	4
ENSG00000122218	COPA	225	180	182	138	221	230	151	183	179	253	133	167	2	2	112	17	226	0	0	28	14	0	69	0	43	163	245	0	52	777	5	115	0	1	0	0	0	0
ENSG00000235082	SUMO1P3	15	0	0	6	0	0	1	0	0	0	0	0	0	0	0	0	0	0	0	0	0	0	0	0	0	0	0	0	0	0	0	0	0	0	0	0	0	0
ENSG00000202078	Y_RNA	0	0	0	0	0	0	0	0	3	0	2	0	0	0	0	0	0	0	0	0	0	0	0	0	0	0	0	0	0	21	0	0	0	0	0	0	0	0
ENSG00000162736	NCSTN	93	39	55	125	76	61	53	48	28	63	47	87	0	0	0	155	23	0	42	0	0	0	0	72	115	0	88	0	1	110	213	121	0	1	0	0	0	0
ENSG00000171786	NHLH1	0	5	0	0	9	0	0	0	0	2	1	0	0	0	0	0	0	0	0	0	0	0	0	0	0	0	0	0	0	0	0	0	0	0	0	0	0	0
ENSG00000201608	RNU4-42P	0	0	0	0	0	0	0	0	0	0	0	0	0	0	0	0	0	0	0	0	0	0	0	0	0	0	0	0	0	0	0	4	0	0	0	0	0	0
ENSG00000162738	VANGL2	0	21	16	0	3	24	14	30	29	15	22	25	0	1	0	0	0	0	0	0	154	1	0	28	0	1	0	0	43	64	0	130	0	0	0	0	0	0
ENSG00000162739	SLAMF6	0	5	11	4	0	22	1	0	0	4	0	1	0	0	0	30	0	1	0	0	0	0	0	0	26	0	0	0	12	50	0	55	0	0	0	0	0	0
ENSG00000066294	CD84	291	316	257	275	176	309	3	14	0	5	2	6	1	2	1	144	58	3	0	0	44	43	1	0	0	0	131	1	74	46	102	34	0	0	0	0	1	0
ENSG00000117090	SLAMF1	7	0	14	0	15	15	0	0	0	0	0	0	0	0	0	0	0	0	0	0	0	0	0	0	0	0	0	0	3	0	0	27	0	0	0	0	0	0
ENSG00000235101	SETP9	0	0	0	0	0	0	0	0	0	0	0	0	0	0	0	0	0	0	0	0	0	0	0	0	0	0	0	0	0	3	0	0	0	0	0	0	0	0
ENSG00000228863	AL121985.1	0	0	1	0	0	3	0	0	1	2	0	0	0	0	0	0	0	0	0	0	0	0	0	0	0	0	0	0	0	1	0	0	0	0	0	0	0	0
ENSG00000117091	CD48	102	157	105	190	125	132	1	0	0	5	0	11	55	0	0	0	0	57	0	1	0	1	0	0	58	33	215	0	0	21	0	3	0	0	0	0	0	0
ENSG00000026751	SLAMF7	157	168	174	301	257	85	3	12	1	19	0	8	39	0	60	0	82	0	53	1	96	0	0	16	1	5	187	0	462	63	0	1	0	0	0	0	0	0
ENSG00000275801	AL121985.3	0	0	0	0	0	0	0	0	0	0	0	0	0	0	0	0	0	0	0	0	0	0	0	0	0	0	0	0	0	6	0	0	0	0	0	0	0	0
ENSG00000122224	LY9	7	11	19	19	8	12	3	0	0	5	1	2	0	0	0	0	0	0	0	0	0	0	0	0	0	0	0	1	0	0	62	0	0	0	0	0	0	0
ENSG00000122223	CD244	0	2	1	2	0	0	0	0	0	0	0	0	0	0	0	0	0	0	0	0	0	0	0	0	0	0	0	0	0	0	0	0	0	0	0	0	0	0
ENSG00000213080	AL354714.2	13	39	38	49	21	118	16	2	3	22	10	16	0	0	0	0	8	0	0	23	1	0	0	0	21	0	0	0	0	138	9	100	0	0	0	0	0	0
ENSG00000158769	F11R	88	67	36	70	11	31	117	221	149	189	164	173	83	67	0	0	92	0	0	285	0	0	13	33	34	1	132	0	48	695	45	168	0	0	0	0	0	1
ENSG00000215845	TSTD1	17	15	31	22	81	23	95	98	124	169	108	163	0	4	1	0	0	0	0	0	0	1	0	0	120	4	14	1	98	1100	0	461	0	0	0	0	0	0
ENSG00000158773	USF1	7	1	6	6	16	0	1	4	5	12	3	5	0	0	0	0	0	0	0	0	0	0	0	0	0	3	40	0	67	0	0	0	0	0	0	0	0	0
ENSG00000186517	ARHGAP30	129	72	188	109	76	100	35	4	7	45	11	32	84	1	1	57	0	0	0	31	82	1	0	0	77	0	163	29	37	244	83	87	0	0	0	0	0	2
ENSG00000143217	NECTIN4	0	13	11	3	6	0	71	51	77	69	87	77	1	2	0	0	0	0	0	0	0	0	1	0	24	3	0	0	0	308	0	411	0	0	0	0	0	0
ENSG00000162755	KLHDC9	0	0	2	0	1	0	12	11	11	8	7	1	0	0	0	1	0	0	0	0	0	0	14	0	0	11	0	0	8	79	0	93	0	0	0	0	0	0
ENSG00000143256	PFDN2	9	59	37	43	12	0	20	12	12	29	20	16	0	0	0	0	55	0	0	0	0	0	0	0	0	0	2	0	1	79	0	160	0	0	0	0	0	0
ENSG00000158793	NIT1	67	87	104	68	64	38	27	36	68	90	47	73	24	28	1	7	114	55	0	43	35	43	2	0	16	0	123	0	23	376	0	1	0	0	0	0	0	1
ENSG00000158796	DEDD	119	91	73	42	85	195	47	35	69	74	48	81	1	43	0	0	0	0	0	0	0	1	0	0	0	35	13	0	0	216	46	281	0	1	0	0	0	3
ENSG00000143222	UFC1	301	200	251	185	226	142	252	270	249	300	213	305	67	119	107	127	1	101	105	1	36	2	0	68	224	132	150	62	207	957	175	841	0	1	0	0	1	4
ENSG00000143258	USP21	3	4	0	2	16	0	6	3	10	3	1	1	0	0	0	9	0	1	0	0	0	0	12	0	0	0	32	0	27	9	0	0	0	0	0	0	0	0
ENSG00000143224	PPOX	0	1	0	4	2	0	3	0	4	0	1	4	0	0	0	0	0	0	0	0	0	0	0	0	0	0	0	0	0	1	0	0	0	0	0	0	0	0
ENSG00000158850	B4GALT3	44	21	29	72	42	28	31	52	57	91	42	55	164	2	59	0	33	0	0	0	4	0	0	0	0	47	11	0	33	168	0	57	0	0	0	1	0	0
ENSG00000158859	ADAMTS4	29	36	30	33	52	48	20	5	8	26	18	17	0	2	29	35	211	3	27	0	0	0	0	0	25	0	344	0	0	24	0	0	0	0	0	0	0	2
ENSG00000158864	NDUFS2	81	69	37	116	47	44	50	54	53	67	63	96	3	1	49	0	0	0	0	104	0	49	0	50	1	2	30	1	52	348	31	159	0	0	0	1	1	0
ENSG00000158869	FCER1G	169	350	241	261	196	309	2	2	0	10	9	12	0	0	208	72	53	0	61	29	52	126	1	0	0	1	127	0	135	5	34	65	1	0	0	0	0	1
ENSG00000158874	APOA2	0	16	0	0	0	0	0	0	0	0	7	0	0	0	0	0	0	0	0	76	0	0	1	0	0	0	0	0	0	4	0	0	0	0	0	0	0	0
ENSG00000158882	TOMM40L	14	1	25	5	0	61	22	6	9	33	14	10	1	2	0	0	0	0	0	0	0	0	0	0	0	0	80	0	1	78	69	68	0	0	0	0	0	2
ENSG00000143257	NR1I3	0	0	0	0	0	0	0	0	0	0	0	0	0	0	0	0	0	0	0	0	0	0	0	0	0	0	0	0	0	3	0	1	0	0	0	0	0	0
ENSG00000248485	PCP4L1	0	0	0	0	0	0	8	0	5	9	5	0	0	0	0	0	0	0	0	0	0	0	0	0	0	0	0	0	0	0	0	0	0	0	0	0	0	0
ENSG00000158887	MPZ	3	0	0	1	0	1	0	0	0	0	1	0	0	0	0	0	0	0	0	0	0	0	0	0	0	0	18	0	0	0	0	31	0	0	0	0	0	0
ENSG00000143252	SDHC	58	53	39	66	38	77	79	47	82	92	77	82	6	0	132	34	7	0	32	1	76	0	3	0	44	57	8	25	45	369	5	314	0	0	1	0	0	2
ENSG00000188931	CFAP126	0	0	0	0	0	0	0	2	2	5	0	13	0	0	0	0	0	0	0	0	0	0	0	0	0	0	0	0	0	0	0	0	0	0	0	0	0	0
ENSG00000277882	AL592295.2	0	1	0	0	0	0	0	0	0	0	0	0	6	0	0	0	0	0	0	0	0	0	0	0	0	0	0	0	53	0	0	0	0	0	0	0	0	0
ENSG00000143226	FCGR2A	176	97	154	108	193	153	4	0	1	4	6	3	26	61	4	38	166	0	2	0	1	177	0	0	36	0	271	0	1	41	23	1	0	0	0	0	1	1
ENSG00000173110	HSPA6	35	63	53	43	23	27	2	2	9	2	3	1	0	13	0	78	0	19	0	83	1	0	0	0	4	0	29	134	20	26	2	77	0	0	0	0	1	1
ENSG00000224203	RPS23P10	24	25	31	1	0	31	4	18	8	19	8	5	0	0	104	0	0	0	0	0	96	0	0	0	0	0	0	0	0	1	0	0	1	0	0	0	0	0
ENSG00000203747	FCGR3A	259	302	289	309	152	213	19	15	18	38	8	15	59	28	1	15	21	17	12	16	70	0	0	37	3	3	323	0	51	74	70	81	0	0	0	0	1	3
ENSG00000244682	FCGR2C	92	129	49	95	100	2	4	0	5	10	6	1	0	0	0	0	0	0	16	0	103	0	0	0	0	0	68	0	210	3	0	0	0	0	0	0	0	1
ENSG00000225217	HSPA7	0	14	2	0	0	0	0	0	0	0	0	0	0	0	0	0	0	0	0	0	0	0	0	0	0	0	0	0	0	0	0	0	0	0	0	0	0	0
ENSG00000231586	RPS23P9	8	3	7	2	0	7	1	5	2	12	7	3	0	0	48	1	0	48	0	3	22	0	0	0	0	0	0	0	1	43	0	0	0	0	0	0	0	0
ENSG00000162747	FCGR3B	116	118	125	108	118	62	3	1	1	31	9	7	2	65	0	0	3	49	39	0	0	0	0	0	15	0	225	0	77	0	0	190	0	0	0	1	0	1
ENSG00000072694	FCGR2B	179	106	154	132	234	61	0	0	1	9	2	8	0	45	172	364	0	0	0	141	113	0	4	7	121	2	269	0	70	32	239	1	0	1	0	0	0	0
ENSG00000213075	RPL31P11	17	13	39	21	9	10	13	1	13	17	14	18	5	4	7	59	15	1	3	3	3	0	1	0	21	4	14	6	20	24	7	27	0	0	1	0	0	0
ENSG00000132185	FCRLA	7	5	0	0	7	0	0	0	0	2	0	0	0	0	0	0	0	0	237	0	0	0	0	0	94	0	0	0	0	0	0	0	0	0	0	0	0	0
ENSG00000162746	FCRLB	0	2	2	1	0	0	0	0	2	0	3	1	0	1	0	0	0	0	0	0	0	0	0	0	0	0	0	0	0	12	0	0	0	0	0	0	0	0
ENSG00000081721	DUSP12	7	29	13	17	42	0	28	18	27	15	48	34	0	2	1	22	0	0	0	0	0	0	0	0	0	12	0	6	79	140	0	196	0	1	0	0	0	0
ENSG00000226889	AL359541.1	8	0	0	0	0	0	0	0	0	0	0	0	0	0	0	0	0	0	0	0	0	0	0	0	0	0	0	0	0	5	0	0	0	0	0	0	0	0
ENSG00000118217	ATF6	77	87	42	64	28	134	53	94	85	67	80	60	154	1	0	208	0	0	0	0	20	0	3	0	0	0	41	0	74	251	399	7	0	0	0	0	0	0
ENSG00000229808	AL391825.1	0	0	0	0	0	0	0	0	0	0	1	0	0	0	0	0	0	0	0	0	0	0	0	0	0	0	0	0	0	0	0	0	0	0	0	0	0	0
ENSG00000162745	OLFML2B	117	102	59	104	55	119	2	5	6	15	0	15	1	5	109	9	24	16	107	0	0	0	0	0	9	1	47	0	14	67	0	8	0	0	0	0	0	0
ENSG00000198929	NOS1AP	0	4	0	0	0	0	7	6	1	0	1	2	0	0	0	0	3	0	5	0	0	0	0	0	0	0	1	0	0	107	0	16	0	0	0	0	0	0
ENSG00000239887	C1orf226	31	26	6	0	0	8	5	3	3	6	2	10	38	0	0	0	0	0	0	0	0	0	0	0	1	0	76	0	28	0	0	0	0	0	0	0	0	0
ENSG00000198574	SH2D1B	0	0	0	10	0	0	0	0	0	0	0	0	0	0	0	0	0	0	0	0	0	0	0	0	0	0	0	0	0	0	0	0	0	0	0	0	0	0
ENSG00000152332	UHMK1	137	139	120	112	100	117	102	72	97	153	146	141	3	39	55	51	363	53	130	0	41	1	15	11	2	3	214	1	24	600	100	357	0	0	1	0	0	0
ENSG00000117143	UAP1	99	170	122	141	50	140	168	136	174	284	179	236	123	4	0	107	49	0	31	185	5	0	4	14	88	1	400	46	119	718	46	581	56	0	0	0	1	4
ENSG00000272574	AL596325.2	1	10	0	0	0	0	0	3	2	4	5	1	0	0	0	0	0	0	0	0	0	0	0	2	0	0	0	0	0	31	46	37	0	0	0	0	0	0
ENSG00000162733	DDR2	116	66	100	85	141	101	24	26	18	42	9	18	109	110	301	193	401	56	127	238	34	82	3	104	43	2	120	0	115	138	2	131	0	0	0	1	92	0
ENSG00000132196	HSD17B7	25	13	24	7	11	2	12	7	13	30	15	36	1	0	25	0	0	0	6	0	25	0	0	1	8	37	1	1	44	137	7	107	0	0	0	0	0	0
ENSG00000185860	CCDC190	2	4	0	4	2	0	0	0	0	0	0	0	0	0	0	0	0	0	0	0	15	0	0	0	16	0	0	0	0	2	0	0	0	0	0	0	0	0
ENSG00000117152	RGS4	0	12	19	20	8	28	6	0	7	16	5	9	0	0	0	0	0	0	96	0	0	0	0	0	0	0	24	0	1	14	0	0	0	0	0	0	0	1
ENSG00000143248	RGS5	286	163	124	188	266	165	75	11	73	65	54	106	146	336	509	442	327	45	132	116	176	0	5	11	21	1	203	244	149	826	54	46	1	2	0	1	0	3
ENSG00000225755	AL451063.1	0	0	0	0	0	8	0	0	0	2	1	0	0	0	0	0	0	0	0	0	0	0	0	0	0	0	0	0	0	0	0	0	0	0	0	0	0	0
ENSG00000232995	RGS5	0	0	8	2	0	0	1	8	2	2	0	0	0	0	0	0	0	0	0	0	0	0	0	0	0	0	0	0	0	0	0	0	0	0	0	0	0	0
ENSG00000143228	NUF2	1	18	0	0	11	0	3	5	15	2	8	9	0	0	0	0	107	0	0	0	0	0	0	0	0	0	0	0	0	65	0	0	0	0	0	0	0	0
ENSG00000213070	HMGB3P6	0	0	0	0	0	0	0	0	0	0	1	0	0	0	1	0	0	0	0	0	0	0	0	0	0	0	0	0	0	0	0	0	0	0	0	0	0	0
ENSG00000185630	PBX1	12	60	75	62	18	18	214	244	209	327	295	264	1	92	36	6	100	2	78	46	60	204	29	69	78	71	1	0	77	1517	2	1010	0	2	0	1	0	2
ENSG00000269887	AL391001.1	0	0	0	0	0	0	3	0	0	2	1	0	0	0	0	0	0	0	0	0	0	0	0	0	0	0	0	0	0	0	0	0	0	0	0	0	0	0
ENSG00000271917	AL357568.2	13	0	0	1	11	0	12	16	5	14	5	17	125	0	0	0	0	0	0	0	0	0	0	0	0	0	0	0	0	89	0	0	0	0	0	0	0	0
ENSG00000225487	AL390119.1	1	0	0	0	0	0	0	0	0	0	0	0	0	0	0	0	0	0	0	0	0	0	0	0	0	0	0	0	0	0	0	0	0	0	0	0	0	0
ENSG00000162761	LMX1A	0	0	0	0	0	0	0	0	0	0	1	0	0	0	0	0	0	0	0	0	0	0	0	0	0	0	0	0	0	0	0	0	0	0	0	0	0	0
ENSG00000143171	RXRG	2	0	3	0	0	0	1	0	0	0	0	0	0	0	0	0	0	0	0	0	0	0	0	0	0	0	1	0	0	0	0	0	0	0	0	0	0	0
ENSG00000162763	LRRC52	0	0	0	0	0	0	0	0	0	0	1	0	0	0	0	0	0	0	0	0	0	0	0	0	0	0	0	0	0	0	0	0	0	0	0	0	0	0
ENSG00000237783	AL356441.2	0	0	0	0	0	0	0	0	0	0	0	0	0	0	0	0	0	0	0	0	0	0	0	0	0	0	0	0	0	0	0	1	1	0	0	0	0	0
ENSG00000143198	MGST3	269	233	253	224	184	260	93	57	65	101	61	88	25	3	291	4	338	12	89	89	73	2	1	0	82	55	127	88	95	490	3	334	0	0	0	1	0	1
ENSG00000143149	ALDH9A1	207	121	143	129	127	155	34	32	54	77	54	27	87	3	298	51	394	40	17	3	89	0	0	12	124	1	3	57	158	301	21	105	138	0	0	3	0	1
ENSG00000230175	AL451074.4	0	0	0	0	0	0	0	0	0	0	0	0	0	0	0	4	0	0	0	0	0	0	0	0	0	0	0	0	1	0	0	2	0	0	0	0	0	0
ENSG00000273365	AL451074.6	0	0	0	0	0	0	0	0	1	0	1	0	0	0	0	0	0	0	0	0	0	0	0	0	0	0	0	0	0	0	0	0	0	0	0	0	0	0
ENSG00000143183	TMCO1	159	142	200	168	229	190	172	196	222	255	242	247	7	10	59	0	49	6	148	0	40	220	1	42	12	2	374	0	197	1608	0	606	1	1	0	1	0	3
ENSG00000230659	AL451074.5	34	50	42	47	24	50	9	10	10	17	11	7	6	6	9	7	91	4	120	1	2	0	0	0	2	1	27	1	32	94	13	22	0	0	1	0	0	0
ENSG00000143179	UCK2	14	7	12	17	0	28	25	15	34	13	12	12	0	1	55	29	0	0	30	0	0	0	0	0	55	0	26	0	0	62	0	60	0	0	0	0	0	0
ENSG00000188859	FAM78B	1	1	17	2	13	8	3	0	0	2	1	0	0	0	0	0	0	0	5	0	0	0	0	11	0	0	1	0	0	26	0	0	0	0	0	0	0	0
ENSG00000203307	AL626787.1	0	0	0	0	0	0	1	0	0	0	0	0	0	0	0	0	0	0	0	0	0	0	0	0	0	0	0	0	0	0	0	0	0	0	0	0	0	0
ENSG00000215835	AL596087.1	0	0	0	0	0	0	0	0	3	4	0	1	0	0	1	0	0	0	0	0	0	0	0	0	0	0	0	0	0	39	0	0	0	0	0	0	0	0
ENSG00000225325	AL583804.1	0	0	0	0	0	0	0	0	0	0	0	0	0	0	0	0	0	0	0	0	0	0	0	0	0	0	0	0	1	0	0	0	0	0	0	0	0	0
ENSG00000215834	FMO9P	0	0	0	0	0	0	3	1	2	0	4	0	0	0	0	0	0	0	0	0	0	0	0	0	0	0	0	0	0	0	0	0	0	0	0	0	0	0
ENSG00000232341	RPL4P2	401	223	361	315	231	401	161	69	113	139	128	160	2	85	67	271	102	9	154	0	156	2	35	38	187	16	139	1	151	719	296	379	0	3	1	1	0	1
ENSG00000143157	POGK	69	20	73	93	54	58	83	90	100	69	117	68	1	5	84	35	0	0	7	0	0	0	0	1	0	1	122	0	0	797	0	300	0	0	0	1	1	1
ENSG00000152382	TADA1	21	3	51	9	0	12	10	28	34	26	25	28	0	2	0	0	0	0	0	0	0	0	0	0	0	0	1	1	0	137	52	39	0	0	1	0	0	1
ENSG00000225171	DUTP6	0	0	0	4	0	11	0	0	9	9	0	4	14	0	0	0	0	0	0	0	0	0	0	0	2	0	0	0	0	0	0	0	0	1	0	0	0	0
ENSG00000143195	ILDR2	0	0	0	0	0	0	0	12	8	0	1	0	0	0	0	0	0	0	0	0	0	0	0	0	0	0	0	0	0	0	0	0	0	0	0	0	0	0
ENSG00000143194	MAEL	0	0	0	0	0	0	0	0	1	0	0	0	0	0	0	0	0	0	0	0	0	0	0	0	1	0	1	0	0	0	0	0	0	0	0	0	0	0
ENSG00000143167	GPA33	0	0	0	0	0	0	0	0	0	0	0	0	0	0	0	0	0	0	0	0	0	0	0	0	0	0	0	0	0	0	19	0	0	0	0	0	0	0
ENSG00000198842	DUSP27	0	1	0	0	0	0	0	0	5	0	0	0	0	0	0	0	0	0	0	0	0	0	0	0	0	0	0	0	0	0	0	0	0	0	0	0	0	0
ENSG00000143190	POU2F1	75	75	77	68	51	64	54	30	33	69	35	75	1	14	43	7	13	0	1	16	48	0	1	0	42	15	1	1	53	206	39	161	0	0	0	0	0	0
ENSG00000198821	CD247	3	0	15	5	37	118	0	0	0	9	0	1	0	0	0	0	0	0	0	0	0	0	0	0	0	0	0	0	0	0	0	0	0	0	0	0	0	0
ENSG00000143162	CREG1	708	635	569	574	506	601	78	56	80	172	60	50	163	102	461	291	188	220	133	144	164	1	3	74	149	6	384	44	28	803	407	339	4	1	2	2	0	4
ENSG00000231029	AL031733.1	0	0	0	0	0	3	0	0	0	0	0	0	0	0	0	0	0	0	0	0	0	0	0	0	0	0	0	0	0	0	0	0	0	0	0	0	0	0
ENSG00000198771	RCSD1	58	29	55	29	35	47	3	2	7	13	1	9	0	49	53	0	0	38	0	0	0	119	0	12	25	1	38	0	0	16	66	0	0	0	0	0	0	0
ENSG00000197965	MPZL1	222	192	56	147	98	131	105	136	157	195	172	169	162	113	300	167	4	0	206	0	63	2	1	14	72	1	276	37	145	836	89	413	0	0	0	0	0	4
ENSG00000143199	ADCY10	0	0	0	0	0	0	0	5	0	0	0	0	0	0	0	0	0	0	0	0	0	0	0	0	0	0	0	0	0	0	0	0	0	0	0	0	0	0
ENSG00000143158	MPC2	94	113	109	111	74	162	96	52	78	159	63	84	0	5	50	1	130	0	44	0	13	0	0	0	0	1	6	0	0	334	41	201	0	0	1	0	0	0
ENSG00000143164	DCAF6	82	47	43	77	35	76	47	32	60	101	52	60	11	1	0	160	0	20	0	0	0	0	1	7	0	0	16	0	0	262	0	94	0	2	0	1	1	0
ENSG00000224837	GCSHP5	0	0	0	5	6	0	3	0	11	11	3	8	0	0	0	0	0	0	0	0	0	0	0	0	0	1	0	0	0	18	0	0	0	0	0	0	0	0
ENSG00000143147	GPR161	10	35	19	9	20	0	9	2	5	1	9	10	0	0	50	0	0	0	0	0	18	0	0	0	0	0	0	0	0	0	0	0	0	0	0	0	0	0
ENSG00000143155	TIPRL	48	40	73	88	70	160	61	30	95	93	62	61	1	5	0	0	16	1	94	0	0	0	4	0	54	44	39	0	3	468	32	136	0	0	0	0	0	1
ENSG00000237049	RPL34P1	22	1	0	9	0	0	0	0	0	2	0	0	0	0	0	0	0	0	0	0	0	0	0	0	0	0	4	0	0	1	2	1	0	0	0	0	0	0
ENSG00000213064	SFT2D2	83	67	52	23	33	9	11	26	12	16	23	27	0	1	0	0	0	0	0	0	0	0	0	28	0	52	28	0	0	63	1	88	0	1	0	0	0	0
ENSG00000214262	ANKRD36BP1	0	0	0	0	0	0	4	0	0	0	0	0	0	0	0	0	0	0	0	0	0	0	0	0	0	0	0	0	0	0	0	0	0	0	0	0	0	0
ENSG00000143178	TBX19	0	10	0	4	23	0	0	0	3	1	0	0	0	0	0	0	0	0	0	0	0	0	0	0	0	0	1	0	0	0	0	0	0	0	0	0	0	0
ENSG00000227722	AL022100.1	0	0	0	0	0	0	0	0	0	0	0	0	0	0	0	0	0	0	0	1	0	0	0	0	0	0	0	0	0	0	0	0	0	0	0	0	0	0
ENSG00000215833	QRSL1P1	0	3	4	6	0	0	5	11	2	13	11	3	0	0	0	0	22	0	0	0	0	0	0	0	0	0	0	0	0	7	0	0	0	0	0	0	0	0
ENSG00000143185	XCL2	1	0	0	5	0	10	0	5	0	0	1	0	0	0	0	0	0	0	3	0	0	0	0	0	0	0	0	0	0	0	0	0	0	0	0	0	0	0
ENSG00000143184	XCL1	0	6	15	30	13	20	0	0	0	4	0	1	0	0	0	0	0	0	4	0	0	0	0	0	0	40	0	0	0	0	0	0	0	0	0	0	0	0
ENSG00000143196	DPT	225	71	163	20	93	175	0	1	0	0	0	0	65	58	447	51	187	0	0	1	0	0	0	1	0	0	28	98	0	16	0	4	1	0	0	0	0	0
ENSG00000143153	ATP1B1	210	417	340	317	239	165	304	264	362	318	306	289	172	30	61	405	44	0	119	100	141	3	45	0	214	71	214	2	76	1766	102	1569	2	1	1	0	1	2
[truncated: 25,687 more rows]

## Sheet: TPM
Ensembl ID	gene name	macrophage_bulk_1	macrophage_bulk_2	macrophage_bulk_3	macrophage_bulk_4	macrophage_bulk_5	macrophage_bulk_6	DCIS_bulk_1	DCIS_bulk_2	DCIS_bulk_3	DCIS_bulk_4	DCIS_bulk_5	DCIS_bulk_6	macrophage_single_1	macrophage_single_2	macrophage_single_3	macrophage_single_4	macrophage_single_5	macrophage_single_6	macrophage_single_7	macrophage_single_8	macrophage_single_9	macrophage_single_10	DCIS_single_1	DCIS_single_2	DCIS_single_3	DCIS_single_4	DCIS_single_5	DCIS_single_6	DCIS_single_7	DCIS_single_8	DCIS_single_9	DCIS_single_10	control_1	control_2	control_3	control_4	control_5	control_6
ENSG00000227232	WASH7P	0	0	0	0	0	0	1.3	1.5	6.5	0	2.6	0	0	0	0	0	3.5	0	0	0	0	0	0	16.3	0	0	0.9	0	2.9	0.4	0	1.1	0	0	0	0	0	0
ENSG00000279457	FO538757.1	0	3.7	0	4	0	0	1.3	3	5.2	0.9	2.6	6.8	0	0	0	0	27.1	0	0	0	0	0	0	0	0	3.8	0	0	0	3.1	0	0	0	0	0	64.4	0	0
ENSG00000228463	AP006222.1	0	0	1.4	0	0	0	6.6	0	2.6	0	0	5.7	0	0	0	0	0	0	0	6.1	0	0	0	0	19.3	0	0	0	29.2	0	0	0	0	0	0	0	0	0
ENSG00000237094	AL732372.2	0	0	0	0	0	0.7	0	0	0	0	0	0	0	0	0	0	0	0	0	3	0	0	0	0	0	0	0	0	0	0.2	0	0	0	0	0	0	0	0
ENSG00000230021	AL669831.3	0.7	0	0	0	0	1.5	0	1.5	1.3	0	0	2.3	24.3	8.1	0	0	0	0	0	0	0	0	0	0	0	0	0	0	0	3.6	0	0	0	0	0	0	0	0
ENSG00000225972	MTND1P23	1210.6	1248.8	1210	1222.2	1186.2	1373.7	640.3	777.8	669.7	513.3	498.6	601.1	1896.3	2340.5	2366.3	1740.9	2701.7	3097.2	927.5	2455.2	2487.8	1479.4	196.8	588.3	1341.8	778	1008.4	1893	1284	766.3	1383.7	946.5	161.5	5625.5	202.2	322	60.2	604.1
ENSG00000225630	MTND2P28	1777.7	1765	2072.9	1837.7	1831.7	1859.3	1939.4	2203.2	1949.7	1838.1	2192	1576.5	2614	2843.5	3666	2231.9	3727.2	1774.9	2612.8	3927.2	2330.4	4024.3	1202.6	1514.3	3006.9	3920.4	2066.2	1555.6	1532	2708.6	1829.6	2619.6	646	856.1	404.4	128.8	421.6	1006.8
ENSG00000237973	MTCO1P12	2545.3	2373.3	2561.9	2453.1	2519.8	2807.3	3961.3	3839.6	4174.8	3809.6	4451.6	3958.2	1047	2908.4	2412.9	1365.2	2757.1	2152.2	2608.4	980.3	2412.2	1353.2	2744.1	2064.5	2854.1	2538	2198.6	1576.7	1506.4	3947.4	2840.7	3178.7	376.8	1345.2	2561.5	322	542	5275.9
ENSG00000278791	MIR6723	0	0	0	0	0	0.7	0	0	0	0	0	0	0	0	0	0	0	0	0	0	0	0	0	0	0	0	0	0	0	0	0	0	0	0	0	0	0	0
ENSG00000229344	MTCO2P12	9.5	15.4	19.9	18.7	42.6	29.2	37.2	62.8	62.1	36.5	62.5	81.7	45.1	8.1	23.9	1.2	0	129.3	209.3	0	0	0	0	0	32.2	203.9	0.9	0	55.6	59.8	0	37.1	0	0	943.7	0	0	0
ENSG00000240409	MTATP8P1	0	0.7	0	0.7	0	0	0	0	0	0	0	0	0	0	0	0	3.5	0	0	0	0	0	0	0	0	0	1.7	0	0	0	1.6	0	0	0	0	0	0	0
ENSG00000248527	MTATP6P1	0	4.4	0	2	0	2.2	4	6	9.1	3.6	7.7	0	0	0	12	0	2.4	0	0	0	0	0	0	0	1.6	3.8	0	0	0	0.4	0	0.4	0	0	0	0	0	0
ENSG00000198744	MTCO3P12	115.2	86.3	71	68.7	62.2	47.5	106.3	160	130.6	57.8	127.5	145.2	145.6	12.2	192.5	75.6	327.7	143.7	59.5	267.1	3.1	0	218.7	119.8	168.9	3.8	156.7	237.3	80.5	121.7	0	127.2	0	0	0	0	180.7	120.8
ENSG00000228327	AL669831.1	0	0	0	0	0	0	0	0	0	0.9	0	0	0	0	0	0	0	0	0	0	0	0	0	0	0	0	0	0	0	0	1.6	0	0	0	0	0	0	0
ENSG00000237491	AL669831.5	2.7	2.9	2.8	0	11.6	26.3	12	3	1.3	0	7.7	2.3	0	0	0	8.7	0	0	0	0	0	0	0	0	0	0	0	0	0	0	0	21.9	0	0	0	0	0	0
ENSG00000230092	AL669831.4	6.1	16.8	34.1	22	23.9	28.5	18.6	9	20.7	24.9	29.3	28.4	0	0	0	29.8	0	0	70.5	0	0	0	0	0	0	3.8	69.2	0	18.5	23.1	122.6	20.8	0	0	0	0	0	0
ENSG00000177757	FAM87B	0	0	0	0	0	0	0	0	0	0	0	0	0	0	1.2	0	0	0	0	0	0	0	0	0	0	0	0	0	0	0	0	0	0	0	0	0	0	0
ENSG00000228794	LINC01128	27.8	17.5	9.9	0	24.6	2.2	5.3	9	7.8	0.9	7.7	15.9	0	0	101.6	1.2	0	0	0	3	0	0	0	0	0	0	108.2	152.9	36.3	0	0	21.9	0	0	0	0	0	40.3
ENSG00000225880	LINC00115	0.7	4.4	0	0	18.8	14.6	0	3	0	1.8	1.3	12.5	0	0	0	0	0	0	0	0	0	5	0	0	0	0	0	0	0	0	0	0	0	0	0	0	0	0
ENSG00000234711	TUBB8P11	0	0	0	0	0	0	0	0	0	0	0	0	0	0	0	0	0	0	0	0	0	0	0	0	0	0	0	0	0	0.2	0	0	0	0	0	0	0	0
ENSG00000223764	AL645608.1	0	0	0	0	0	2.2	0	4.5	0	0	1.3	0	0	0	0	0	0	0	0	0	0	0	0	0	0	0	0	0	0	0	0	0	0	0	0	0	0	0
ENSG00000187634	SAMD11	0	0	0	0	0	0	0	4.5	0	0	0	0	0	182.5	0	0	0	0	0	0	0	0	0	0	0	0	0	0	0	0.2	12.7	1.9	0	0	0	0	0	0
ENSG00000188976	NOC2L	0	4.4	10.6	0	0	8	0	0	0	1.8	1.3	0	0	0	0	7.4	0	3.6	103.5	0	0	0	0	0	24.1	0	24.2	0	0	0.6	0	0	0	0	0	0	0	0
ENSG00000187961	KLHL17	0	0	0	0	0	0	0	0	0	0	0	0	0	0	0	0	0	0	0	0	0	0	0	0	0	0	0	0	0	0	0	18.2	0	0	0	0	0	0
ENSG00000187583	PLEKHN1	0	0	7.8	0	0	0	4	0	3.9	0	3.8	1.1	0	0	0	0	0	0	0	0	0	0	0	0	0	0	0	0	0	0	0	1.5	0	0	0	0	0	0
ENSG00000272512	AL645608.8	0	0	0.7	0	0	0	1.3	0	1.3	0	3.8	0	0	0	0	0	0	0	0	0	0	0	0	0	0	0	0	0	0	0	0	0	0	0	0	0	0	0
ENSG00000188290	HES4	0.7	8	3.5	11.3	7.2	0	55.8	15	22	27.6	21.7	25	3.5	81.1	59.8	0	1.2	0	0	91	113.4	0	295.2	0	77.2	3.8	7.8	0	4.3	22.4	0	47.5	0	0	0	64.4	0	0
ENSG00000187608	ISG15	10.2	2.9	7.1	4	6.5	3.7	8	1.5	7.8	9.8	8.9	5.7	0	0	0	0	0	0	0	0	0	0	0	0	0	0	33.8	58	0.7	7.1	0	6.3	0	0	0	0	0	0
ENSG00000188157	AGRN	0	0	0	0	0	0	0	0	3.9	0.9	0	2.3	0	0	0	0	0	0	0	0	0	0	0	0	0	0	0	0	0	0	0	0	0	0	0	0	0	0
ENSG00000217801	AL390719.1	0	0	0	0	0	2.2	0	0	0	0.9	2.6	0	0	0	0	0	1.2	0	0	0	0	0	0	0	0	0	0	0	0	5.2	0	0	0	0	0	0	0	0
ENSG00000237330	RNF223	0	0	0	0	0	0	5.3	0	0	0.9	5.1	0	0	0	0	0	0	0	0	0	0	0	0	0	0	0	0	0	0	0	0	0	0	0	0	0	0	0
ENSG00000131591	C1orf159	0.7	12.4	1.4	2.7	0	0	4	0	1.3	2.7	7.7	4.5	0	0	0	0	0	3.6	0	0	15.7	0	0	141.6	0	0	0.9	0	0.7	2.3	0	0.4	0	0	67.4	0	0	0
ENSG00000223823	LINC01342	0	0	0	0	0	0	0	0	0	2.7	0	0	0	0	0	0	0	0	0	0	0	0	0	0	0	0	0	0	0	0	0	0	0	0	0	0	0	0
ENSG00000272141	AL390719.2	0	0	0	0	0	0	1.3	0	0	0	3.8	7.9	0	0	0	0	0	0	0	0	0	0	0	0	0	0	0	0	0	3.8	0	0	0	0	0	0	0	0
ENSG00000205231	TTLL10-AS1	0	0	0	0.7	0	0	0	0	0	0	0	0	0	0	0	0	0	0	0	0	0	0	0	0	0	0	0	0	0	0	0	0	0	0	0	0	0	0
ENSG00000186891	TNFRSF18	25.1	1.5	19.2	7.3	5.8	11.7	0	4.5	3.9	8.9	3.8	13.6	0	0	0	0	0	0	0	0	0	0	0	0	0	11.3	44.1	0	0	17.4	0	0	0	0	0	0	0	40.3
ENSG00000186827	TNFRSF4	0	1.5	0	1.3	0	0	0	0	0	0.9	0	0	0	4.1	0	0	0	0	0	0	0	0	0	0	0	0	0	0	43.5	3.1	0	0	0	0	0	0	0	0
ENSG00000078808	SDF4	56.2	95	49.7	52	82.4	65.7	41.2	17.9	53	54.3	19.1	48.8	0	251.5	2.4	95.5	53	147.3	17.6	0	6.3	5	0	81.7	302.5	11.3	42.4	142.4	119	4.4	208.6	54.9	53.8	0	0	64.4	60.2	5678.6
ENSG00000176022	B3GALT6	3.4	7.3	18.5	43.3	30.4	5.1	12	0	22	4.4	5.1	17	38.1	0	0	67	0	0	0	0	0	0	0	5.4	0	0	47.6	0	0	0.2	0	0	0	0	0	0	0	0
ENSG00000184163	C1QTNF12	0	0	0	0	0	0	1.3	0	2.6	0.9	0	0	0	0	0	0	0	0	0	0	0	0	0	0	0	0	0	0	0	5.7	0	0	0	0	0	0	0	0
ENSG00000160087	UBE2J2	6.8	41.7	30.5	18	31.8	30.7	17.3	22.4	14.2	19.6	3.8	13.6	0	133.9	0	0	0	0	28.6	0	59.8	0	0	5.4	0	22.7	15.6	0	108.3	6.3	234.1	36.7	0	0	0	0	0	0
ENSG00000162572	SCNN1D	0	0	0	0	0	0	1.3	0	0	0	0	0	0	0	0	0	0	0	0	0	0	0	0	0	0	0	0	0	0	0	0	0	0	0	0	0	0	0
ENSG00000131584	ACAP3	2.7	14.6	7.1	15.3	0.7	5.1	9.3	0	9.1	4.4	16.6	10.2	0	0	0	0	14.1	0	0	0	0	0	0	0	0	0	0	0	0	13.2	0	1.5	0	0	0	0	0	40.3
ENSG00000169972	PUSL1	0	0	0	0.7	0	0	0	0	0	0	0	0	0	0	0	0	0	0	0	6.1	0	0	0	0	0	0	0	0	0	0	0	0	0	0	0	0	0	0
ENSG00000127054	INTS11	0	0	0	0	0	0	0	0	3.9	0	1.3	0	0	0	0	0	0	0	0	0	0	0	0	0	0	3.8	0	0	0	5.9	0	0	0	0	0	0	0	0
ENSG00000169962	TAS1R3	0	0	0	0	10.8	0	6.6	0	0	0.9	1.3	0	0	0	0	1.2	0	0	0	0	0	0	0	0	0	3.8	0	0	72	0	0	0	0	0	0	0	0	0
ENSG00000107404	DVL1	0	13.9	4.3	9.3	36.1	0	0	3	0	6.2	2.6	4.5	0	0	0	100.4	0	0	0	0	0	0	0	0	0	3.8	0	110.7	34.9	0.2	0	16.3	0	0	67.4	0	0	0
ENSG00000162576	MXRA8	147.7	239.1	161.1	220.7	223.4	127.8	97	76.3	84	57.8	34.4	38.6	0	117.6	357.5	370.8	0	614.4	37.5	0	667.6	5	21.9	0	19.3	211.5	62.3	0	124	61.5	278.7	18.5	0	61.1	202.2	64.4	0	120.8
ENSG00000221978	CCNL2	52.2	40.9	39.7	90	33.3	15.3	29.2	44.9	53	30.2	38.3	37.4	225.3	0	0	39.7	89.6	0	33	3	308.6	0	164	196.1	143.2	3.8	134.2	68.6	97.6	37.5	0	98.6	0	0	0	0	0	40.3
ENSG00000224870	AL391244.1	10.2	0	0	4.7	0	0	4	0	2.6	0	2.6	1.1	0	0	28.7	0	0	0	0	0	0	0	0	0	0	0	0	0	0	0	0	0	0	0	0	0	0	0
ENSG00000242485	MRPL20	21.7	51.9	51.8	23.3	112	33.6	18.6	10.5	20.7	17.8	11.5	23.8	0	4.1	0	47.1	20	0	8.8	0	0	0	0	375.9	0	3.8	47.6	0	1.4	25.6	49.4	28.5	0	0	0	0	0	0
ENSG00000235098	ANKRD65	0	0.7	0	0.7	0	0.7	0	0	0	0	0	0	0	0	0	1.2	0	0	0	0	0	0	0	0	0	0	0	0	0	0	0	0	0	0	0	0	0	0
ENSG00000179403	VWA1	0	0	5.7	0	7.2	0	5.3	9	11.6	27.6	5.1	12.5	0	0	0	0	0	0	0	0	0	0	0	0	0	128.4	0	0	121.8	33.6	1.6	55.6	0	0	0	0	60.2	40.3
ENSG00000215915	ATAD3C	0	0	0	0	0	0	0	0	0	1.8	0	0	1.7	0	0	0	0	0	0	0	0	0	0	0	0	0	0	0	0	0	0	0	0	0	0	0	0	0
ENSG00000160072	ATAD3B	20.3	0	0	2	0	0	0	0	0	4.4	0	4.5	0	0	0	0	0	0	0	0	0	0	0	0	0	0	0	0	0	0	0	0	0	0	0	0	0	0
ENSG00000197785	ATAD3A	22.4	21.9	18.5	18.7	22.4	17.5	30.6	10.5	18.1	16	14	11.3	0	0	0	0	82.5	0	0	0	0	5	677.8	0	59.5	0	2.6	0	0	25	1.6	37.1	0	0	0	128.8	0	0
ENSG00000205090	TMEM240	0	0	0	0	0	0	0	0	0	1.8	0	0	0	0	0	0	0	0	0	0	0	0	0	0	0	0	0	0	0	0	0	0	0	0	0	0	0	0
ENSG00000160075	SSU72	23	21.9	18.5	20.7	6.5	5.1	5.3	9	2.6	7.1	0	14.7	6.9	0	0	5	166.2	0	4.4	0	0	0	0	0	0	0	10.4	0	4.3	0.2	1.6	0	53.8	61.1	0	0	0	0
ENSG00000215014	AL645728.1	10.2	0	9.2	4	5.8	0	0	0	0	0	0	0	0	0	0	0	0	0	0	0	0	0	0	49	0	0	0	0	24.2	0	0	12.6	0	0	0	0	0	0
ENSG00000228594	FNDC10	0	0	2.1	0	0	0	0	0	0	0	0	0	0	0	0	0	0	0	0	0	0	0	0	0	0	0	0	0	0	0	0	0	0	0	0	0	0	0
ENSG00000272106	AL691432.2	6.8	1.5	0	4.7	0	25.6	0	6	0	1.8	0	0	0	0	0	0	0	0	6.6	0	0	0	0	0	0	0	0	0	0	0	0	0	0	0	0	0	0	0
ENSG00000197530	MIB2	4.7	0.7	2.1	0	15.2	0	0	0	0	2.7	0	0	0	0	0	0	0	0	0	0	0	0	0	0	0	0	0	0	0	0	0	0	0	0	0	0	0	0
ENSG00000189409	MMP23B	0	0	5	0	10.8	0	4	0	0	0	0	0	0	0	0	0	0	0	0	0	0	0	0	0	0	0	0	0	0	0	0	0.4	0	0	0	0	0	0
ENSG00000248333	CDK11B	77.9	112.6	70.3	44.7	67.9	59.2	35.9	9	34.9	13.3	57.4	44.2	0	182.5	0	161.2	207.5	0	74.9	0	69.3	631.2	10.9	0	122.3	0	189.6	0	0	33.6	285	54.9	0	0	67.4	0	0	80.5
ENSG00000189339	SLC35E2B	6.8	27.1	6.4	6.7	0.7	8.8	12	1.5	0	10.7	3.8	5.7	0	0	101.6	0	0	0	0	0	0	5	0	0	119.1	0	0	0	45.6	9.6	0	2.6	0	0	0	64.4	0	0
ENSG00000215914	MMP23A	0	2.2	2.1	0	0	0	0	0	0	0	0	0	0	0	0	0	0	0	0	0	0	0	0	0	0	0	0	0	0	0	0	0	0	0	0	0	0	0
ENSG00000008128	CDK11A	0	0	0	0	0	0	0	0	1.3	0	0	0	0	0	2.4	0	0	0	0	0	0	0	0	0	0	0	0	0	0	0	0	0	0	0	0	0	0	0
ENSG00000268575	AL031282.2	0	0	0	0	0	0	0	0	0	0	0	0	0	0	0	0	0	0	0	0	0	0	0	0	0	0	0	0	0	0	0	0.4	0	0	0	0	0	0
ENSG00000227775	AL031282.1	0.7	0.7	0	0	0.7	0	0	1.5	1.3	0	1.3	7.9	0	0	0	0	1.2	0	13.2	0	0	0	0	0	1.6	0	0	0	0	1.9	0	19.3	0	0	0	0	0	0
ENSG00000215790	SLC35E2	8.1	0	2.8	0	0	0	4	0	0	0.9	0	2.3	0	0	6	0	0	0	0	0	0	0	0	0	0	0	0	0	0	0.2	0	0.4	0	0	0	0	0	0
ENSG00000008130	NADK	34.6	35.8	24.8	28.7	8	54.8	13.3	4.5	24.6	16	5.1	18.1	13.9	4.1	21.5	73.2	1.2	0	0	0	0	0	10.9	0	1.6	691.2	87.4	0	2.1	19.9	0	0.4	0	0	0	0	0	0
ENSG00000078369	GNB1	277.8	358.3	277.5	300.1	171.3	326.4	215.2	127.1	166.8	139.7	131.3	184.9	436.8	750.4	218.8	355.9	641.2	510.2	282	206.4	412.5	409	43.7	65.4	156.1	1435.2	534.1	237.3	92.6	258.9	296.2	246.2	53.8	61.1	67.4	0	0	80.5
ENSG00000178821	TMEM52	0	0	0	1.3	0	0	4	0	0	0.9	2.6	0	0	0	0	0	0	0	0	0	0	0	0	0	0	0	0	0	0	0	0	0	0	0	0	0	0	0
ENSG00000142609	CFAP74	0	0	0	0	0	0	0	0	0	0	1.3	0	0	0	0	0	0	0	2.2	0	0	0	0	0	0	0	0	0	0	0	0	0	0	0	0	0	0	0
ENSG00000233542	AL391845.2	0	0	0	0.7	0	0	2.7	1.5	0	0	1.3	0	0	0	0	0	0	0	0	0	0	0	0	0	0	0	0	0	0	4.8	0	0.4	0	0	0	0	0	0
ENSG00000187730	GABRD	0	1.5	0	1.3	0	0	1.3	0	1.3	2.7	0	1.1	0	0	0	0	8.3	0	0	0	3.1	0	0	0	0	0	1.7	0	0.7	0.6	0	0.7	0	0	0	0	0	0
ENSG00000067606	PRKCZ	0	0	1.4	1.3	0	0	0	0	0	0	0	0	0	0	0	0	0	0	0	0	0	0	0	0	0	0	0	0	0	0	0	0	0	0	0	0	0	0
ENSG00000271806	AL590822.2	0.7	0	0	0.7	0	0	0	0	0	0	0	0	0	0	0	0	0	0	0	0	0	0	0	0	0	0	0	0	0	0.2	0	0.7	0	0	0	0	0	0
ENSG00000162585	FAAP20	0	0	7.1	11.3	0	0	1.3	4.5	0	4.4	7.7	3.4	0	0	0	0	0	0	33	0	0	0	0	0	0	0	0	0	0	13.8	0	0	0	0	0	0	0	0
ENSG00000234396	AL590822.1	0	0	0	0	0	0	0	0	0	0	0	0	0	0	0	0	0	0	0	0	0	0	0	0	0	0	0	0	10	0	0	0	0	0	0	0	0	0
ENSG00000157933	SKI	47.4	46.1	49.7	18	38.3	17.5	23.9	3	15.5	41.8	3.8	29.5	41.6	316.4	39.5	112.8	86	416.8	0	0	28.3	1247.2	0	326.8	99.7	0	69.2	0	0	20.3	272.3	94.5	0	0	0	0	0	0
ENSG00000116151	MORN1	0	0	0	0	0	0	0	0	1.3	0	3.8	1.1	0	0	0	5	0	0	2.2	0	0	0	0	0	0	0	0	0	0	0	0	0	0	0	0	0	0	0
ENSG00000269896	AL513477.1	0	2.2	0	0	0	0	0	0	0	0	0	0	1.7	0	0	0	0	0	0	0	0	0	0	0	0	0	0	0	0	0	0	0	0	0	0	0	0	0
ENSG00000272420	AL513477.2	0	0.7	0	0	0	0	0	0	0	0	0	0	0	0	0	0	0	0	0	0	0	0	0	0	0	0	0	0	0	6.3	0	0	0	0	0	0	0	0
ENSG00000157916	RER1	31.2	29.2	43.3	29.3	59.3	43.1	13.3	7.5	2.6	35.6	20.4	18.1	0	4.1	220	114.1	259.3	190.4	0	0	0	5	0	0	27.4	3.8	37.2	5.3	0	55.4	0	0.4	0	0	0	0	0	80.5
ENSG00000157911	PEX10	9.5	8	5.7	10.7	4.3	0	6.6	12	3.9	0	2.6	0	0	0	0	0	0	0	0	0	0	0	0	0	0	0	0	474.6	17.8	0	0	0	0	0	67.4	0	0	0
ENSG00000149527	PLCH2	0	0	0	0	0	0	0	0	0	3.6	1.3	0	0	0	0	0	0	0	0	0	0	0	0	0	0	0	0	0	0	0	0	0	0	0	0	0	0	0
ENSG00000224387	AL139246.1	0	0	0	0	0	0	0	0	0	0	0	0	0	0	0	0	0	0	0	0	0	0	0	0	0	0	0	0	0	6.1	0	0	0	0	0	0	0	0
ENSG00000157881	PANK4	14.2	5.1	14.2	11.3	7.2	0	5.3	3	12.9	0.9	3.8	6.8	12.1	0	0	0	0	0	0	0	0	0	0	0	3.2	7.6	0	0	0	1.3	0	0	0	0	0	0	0	0
ENSG00000272449	AL139246.5	0	0.7	0	0	0	8	13.3	9	3.9	1.8	2.6	0	0	0	0	0	0	0	0	0	0	0	0	0	0	0	0	0	0	0.2	0	0	0	0	0	0	0	0
ENSG00000157873	TNFRSF14	75.9	117.7	134.8	146	105.5	225.7	8	10.5	10.3	22.2	10.2	26.1	0	129.8	0	457.5	86	0	167.4	69.8	56.7	0	10.9	0	17.7	0	81.4	0	102.6	42	124.2	0	0	0	67.4	0	0	0
ENSG00000228037	AL139246.3	0	0	0	0	0	0	0	0	0	0	0	4.5	0	0	0	0	0	0	0	0	0	0	0	0	0	0	0	0	0	0	0	0	0	0	0	0	0	0
ENSG00000157870	FAM213B	15.6	4.4	5	0	0	0	1.3	0	0	3.6	2.6	1.1	0	0	0	0	0	0	0	0	0	0	0	0	0	0	0	5.3	0	0	1.6	54.5	0	0	0	0	0	0
ENSG00000142606	MMEL1	0	0	0	0	0	0	12	1.5	19.4	14.2	21.7	17	0	0	0	0	0	0	0	0	0	0	0	0	0	0	0	0	0	12.8	0	49.7	0	0	0	0	0	0
ENSG00000215912	TTC34	0	0	0	0	0	16.8	9.3	1.5	2.6	0	0	2.3	0	0	0	0	0	0	0	0	0	0	0	0	1.6	0	0	0	0	10.3	0	0	0	0	0	0	0	0
ENSG00000177133	LINC00982	0	0	0	0	0	0	0	0	0	0	0	0	0	0	0	0	100.2	0	0	0	0	0	0	0	0	0	0	0	0	0	0	0	0	0	0	0	0	0
ENSG00000142611	PRDM16	8.8	2.9	0	10.7	0	0	0	0	2.6	5.3	8.9	11.3	0	0	0	0	0	0	66.1	85	0	0	0	0	1.6	0	1.7	0	0	6.7	0	12.6	0	0	0	0	0	0
ENSG00000226286	AL008733.1	0	0	0	0	0	0	0	0	0	0	0	1.1	0	0	0	0	0	0	0	0	0	0	0	0	0	0	0	0	0	0	0	0	0	0	0	0	0	0
ENSG00000130762	ARHGEF16	0	0	0	0.7	0	0	50.5	44.9	38.8	52.5	42.1	39.7	0	8.1	0	0	0	0	0	0	0	0	0	0	0	3.8	0	0	0	61.7	0	67.5	0	0	0	0	0	0
ENSG00000162591	MEGF6	41.3	33.6	19.2	16.7	15.9	30.7	6.6	6	5.2	4.4	1.3	9.1	0	0	87.3	266.6	0	0	0	0	132.3	0	10.9	0	0	0	33.8	0	38.5	9.2	116.2	16.3	53.8	0	67.4	64.4	0	0
ENSG00000158109	TPRG1L	33.2	16.1	27.7	32	12.3	13.1	10.6	16.5	23.3	14.2	12.8	5.7	0	8.1	0	85.6	331.2	0	0	0	0	0	21.9	43.6	0	0	0	548.4	10	6.5	0	0	0	0	0	0	0	0
ENSG00000116213	WRAP73	17.6	36.6	24.1	39.3	8	19	9.3	1.5	9.1	8	6.4	14.7	0	0	0	0	0	0	143.2	124.4	0	186.8	0	0	0	0	91.8	0	0	6.9	116.2	13	0	0	0	0	0	0
ENSG00000078900	TP73	0	2.9	1.4	8	0	0	1.3	0	0	0	1.3	2.3	0	0	0	0	0	0	0	0	0	0	0	0	0	0	0	0	0	0	0	0	0	0	0	0	0	0
ENSG00000227372	TP73-AS1	13.5	19.7	0.7	22	0	0	5.3	0	5.2	8.9	16.6	4.5	0	0	0	79.4	0	50.3	0	0	0	0	0	87.2	0	0	0	0	0	0.4	0	0.4	0	0	0	0	0	0
ENSG00000235169	SMIM1	0	0	0	0	0	0	0	0	1.3	1.8	0	0	0	0	0	0	0	0	0	0	0	0	0	0	0	0	0	0	0	0	0	0	0	0	0	0	0	0
ENSG00000130764	LRRC47	5.4	8	0	2	0	0	1.3	0	0	0	0	2.3	0	0	0	0	0	0	0	0	0	0	0	0	0	0	0	0	0	5.7	0	0	0	0	0	0	0	0
ENSG00000272153	AL365330.1	0	0	0	0	0	0	2.7	0	0	0	0	0	0	0	0	0	0	0	0	0	0	0	0	0	0	0	0	0	0	0	0	0	0	0	0	0	0	0
ENSG00000116198	CEP104	28.5	19	9.2	24	2.2	11.7	14.6	17.9	6.5	11.6	14	4.5	0	0	32.3	0	0	0	0	0	0	25.2	0	190.7	0	7.6	0	0	0	25	78	18.2	0	0	0	0	0	0
ENSG00000169598	DFFB	1.4	0	2.8	4.7	4.3	0	0	0	0	0	0	0	0	0	0	0	0	0	0	0	0	0	0	0	0	0	0	0	0.7	0	0	0	0	0	0	0	0	0
ENSG00000198912	C1orf174	10.2	41.7	27	34.7	24.6	59.9	5.3	22.4	11.6	4.4	23	22.7	0	0	174.6	0	18.9	136.5	0	3	0	0	0	0	157.7	0	10.4	0	126.1	24.8	0	0	53.8	0	0	0	0	40.3
ENSG00000236423	LINC01134	0	2.9	0	4	0	0	0	1.5	0	0	0	0	0	0	0	0	0	0	0	0	0	0	0	0	0	0	0	0	0	0	0	0	0	0	0	0	0	0
ENSG00000233304	LINC01346	0	0	0	0	0	0	0	0	0	0.9	0	0	0	0	0	0	0	0	0	0	0	0	0	0	0	0	0	0	0	0	0	0	0	0	0	0	0	0
ENSG00000229280	EEF1DP6	2.7	30	14.2	0.7	34	9.5	17.3	38.9	11.6	12.5	21.7	28.4	20.8	0	155.4	0	0	68.3	0	0	0	0	0	0	0	3.8	6.1	0	0	40.9	0	0.4	0	0	67.4	64.4	0	0
ENSG00000235054	LINC01777	0	0	0	0	0	0	0	0	0	0	0	0	0	0	0	0	0	0	0	0	0	0	0	0	0	0	0	0	0	0	0	0.4	0	0	0	0	0	0
ENSG00000232596	LINC01646	0	0	0	0.7	0	0	0	0	0	0	0	0	0	0	0	0	0	0	0	0	0	0	0	0	0	0	0	0	0	0	0	0	0	0	0	0	0	0
ENSG00000196581	AJAP1	0	0	0	0	6.5	0	4	0	0	0	0	2.3	0	0	0	0	0	0	0	0	0	0	0	0	0	0	0	0	0	0	0	0	0	0	0	0	0	0
ENSG00000131697	NPHP4	23.7	14.6	17	19.3	36.1	16.1	6.6	0	5.2	0	3.8	1.1	1.7	0	0	0	0	0	0	233.7	0	0	10.9	0	0	0	11.3	0	0	0	0	14.1	0	0	0	0	0	0
ENSG00000069424	KCNAB2	102.3	98.7	101.5	98	133	85.4	4	0	6.5	8	3.8	0	360.5	8.1	0	138.9	69.5	0	112.4	0	245.6	50.5	0	5.4	40.2	11.3	91.8	0	0.7	22.4	0	34.5	0	0	0	0	0	40.3
ENSG00000116254	CHD5	0	0	1.4	4.7	6.5	0	0	0	0	2.7	2.6	1.1	0	0	0	0	0	0	0	0	0	0	0	0	0	0	0	0	0	1	8	8.9	0	0	0	0	0	0
ENSG00000116251	RPL22	367.9	256.6	324.3	377.4	331.8	509	162.1	182.5	162.9	99.6	137.7	154.2	247.9	462.4	153.1	394.3	389	154.5	546.4	109.3	204.7	1085.6	688.8	108.9	556.7	139.7	589.5	121.3	243.7	174.7	195.9	209.5	0	244.6	202.2	0	60.2	322.2
ENSG00000158286	RNF207	21.7	5.1	5	0	3.6	0	41.2	0	10.3	7.1	33.2	0	0	0	0	0	0	0	0	0	0	0	0	0	0	0	0	0	0	7.1	0	6.7	0	0	0	0	0	0
ENSG00000116237	ICMT	12.9	45.3	41.9	22.7	17.3	4.4	26.6	26.9	36.2	24.9	21.7	7.9	1.7	0	0	55.8	0	0	6.6	0	0	0	0	0	0	0	35.5	0	0	24.1	0	0	0	0	0	0	0	0
ENSG00000225077	LINC00337	0	0	0	0	0	0	4	0	0	0	0	0	0	0	0	0	0	0	0	0	0	0	0	0	0	0	0	0	0	0	0	0	0	0	0	0	0	0
ENSG00000173673	HES3	0	0	0	0	0	0	0	0	0	0	0	0	0	0	0	0	0	0	0	0	0	0	0	0	0	0	0	0	0	0.2	0	0	0	0	0	0	0	0
ENSG00000158292	GPR153	7.5	17.5	2.8	8	27.5	0.7	10.6	4.5	3.9	3.6	6.4	2.3	0	0	0	0	0	132.9	196.1	0	0	0	0	0	0	0	0.9	0	0	10.3	0	0	0	0	0	0	0	0
ENSG00000097021	ACOT7	9.5	1.5	7.1	2	28.9	0	5.3	0	7.8	13.3	3.8	3.4	0	4.1	0	22.3	0	0	0	0	0	0	0	0	0	0	0	0	0	4	41.4	14.1	0	0	0	0	0	0
ENSG00000271746	AL031848.2	0	0	0	0	0	0	0	0	0	0	0	0	0	0	0	0	0	0	0	0	0	0	0	0	0	0	0	0	17.1	0	0	0	0	0	0	0	0	0
ENSG00000069812	HES2	8.1	10.2	2.1	10.7	0.7	0.7	13.3	4.5	5.2	8.9	10.2	11.3	0	0	0	0	0	0	0	0	0	0	0	5.4	9.7	0	0.9	0	6.4	22.7	0	0	0	61.1	0	0	0	0
ENSG00000187017	ESPN	0	0	0	0	0	0.7	14.6	3	3.9	4.4	12.8	7.9	0	0	1.2	0	0	0	0	0	0	0	0	0	0	0	0	0	14.3	1.5	0	27.4	0	0	0	0	0	0
ENSG00000215788	TNFRSF25	22.4	16.1	17.7	10	11.6	8	29.2	47.9	15.5	28.5	11.5	15.9	43.3	4.1	298.9	0	33	0	0	121.4	0	0	10.9	0	0	34	0	163.5	94.1	44.5	6.4	50.8	0	0	0	0	0	0
ENSG00000171680	PLEKHG5	5.4	2.2	0.7	0.7	10.8	0	12	10.5	7.8	3.6	14	20.4	195.9	0	63.4	34.7	1.2	0	0	0	0	0	0	5.4	0	0	0.9	0	24.9	7.8	0	20.4	0	0	0	64.4	0	0
ENSG00000162408	NOL9	47.4	29.2	17	40.7	48.4	54	13.3	23.9	19.4	24.9	12.8	10.2	0	434	50.2	86.8	0	0	0	0	0	0	0	0	381.3	0	28.6	174	29.2	18	132.2	28.2	0	0	0	0	0	0
ENSG00000229519	AL591866.1	48.8	103.1	119.2	157.4	92.5	106.6	94.3	62.8	104.7	81	127.5	128.2	50.3	73	80.1	57	121.4	319.8	215.9	9.1	78.7	151.5	43.7	0	173.8	11.3	106.5	532.6	104	65.5	164	107.1	0	122.3	0	64.4	0	80.5
ENSG00000204859	ZBTB48	0	0	0	0.7	0	0	0	0	0	0	0	0	0	0	0	0	0	0	0	0	0	0	0	0	0	0	0	0	0	3.4	0	0	0	0	0	0	0	0
ENSG00000162413	KLHL21	14.9	16.1	25.5	16	49.9	29.2	14.6	6	14.2	6.2	10.2	6.8	0	0	29.9	0	201.6	71.9	0	75.9	75.6	5	0	0	1.6	0	0	0	0	0	0	43.7	0	0	0	0	0	0
ENSG00000116273	PHF13	1.4	6.6	7.8	12	3.6	0	5.3	4.5	18.1	10.7	8.9	2.3	1.7	4.1	0	0	0	0	0	0	0	0	0	0	0	0	0	0	0	13.8	0	0	0	0	0	0	0	0
ENSG00000041988	THAP3	0	5.8	2.1	0	10.1	19.7	1.3	12	6.5	4.4	1.3	0	0	0	0	0	0	0	55.1	0	0	0	0	0	0	0	0	0	48.5	1.7	0	0	0	0	0	0	0	0
ENSG00000007923	DNAJC11	0	11.7	0	14.7	0	12.4	0	1.5	6.5	8	1.3	0	0	0	0	0	0	0	0	0	0	0	0	0	12.9	0	24.2	0	0.7	0.2	0	0	0	0	0	0	0	0
ENSG00000228750	LINC01672	0	0	0	0	0	0	0	0	0	0	0	0	0	0	0	0	0	0	0	0	0	0	0	0	0	0	0.9	0	0	0	0	0	0	0	0	0	0	0
ENSG00000171735	CAMTA1	42	25.6	53.9	52	51.3	38	15.9	9	28.4	12.5	16.6	17	0	0	0	214.5	165	0	0	0	0	0	21.9	0	0	11.3	22.5	0	42	11.3	140.1	24.8	107.7	0	67.4	0	0	40.3
ENSG00000269978	AL359881.1	0	0	0	0	0	0	4	0	3.9	0	0	0	0	0	0	0	0	0	0	0	0	0	0	0	0	0	0	0	0	0	0	0	0	0	0	0	0	0
ENSG00000049245	VAMP3	85.4	103.1	132	82.7	47	43.1	54.5	70.3	32.3	71.2	20.4	21.5	3.5	539.5	322.8	43.4	203.9	118.6	0	139.6	44.1	85.8	32.8	158	6.4	7.6	142	406	14.3	65.5	149.7	52.3	0	61.1	0	0	60.2	80.5
ENSG00000269925	Z98884.2	0	0	2.1	0	0	0	0	0	0	0	0	0	0	0	0	0	0	0	0	0	0	0	0	0	0	0	0	0	0	0	0	0	0	0	0	0	0	0
ENSG00000049246	PER3	100.9	13.2	59.6	92	26	73	9.3	0	19.4	16.9	17.9	3.4	13.9	202.8	37.1	3.7	328.9	729.4	72.7	0	0	0	0	0	0	0	2.6	0	47	30.4	0	0.4	0	0	0	64.4	0	0
ENSG00000049247	UTS2	13.5	21.9	16.3	25.3	46.3	66.5	0	0	0	3.6	0	0	0	0	0	0	0	0	0	0	0	0	0	0	0	0	0	0	0	0	0	0	0	0	0	0	0	0
ENSG00000049249	TNFRSF9	0	6.6	6.4	7.3	8.7	9.5	1.3	1.5	0	1.8	0	2.3	0	0	1.2	0	0	0	0	0	3.1	0	0	0	0	3.8	0.9	0	0	0	0	0.4	0	0	0	0	0	0
ENSG00000116288	PARK7	54.9	95	96.5	58	117.8	48.9	47.8	38.9	44	60.5	51	76	152.5	0	65.8	23.6	208.6	0	301.8	15.2	0	611	0	0	117.4	15.1	87.4	0	16.4	31.3	191.1	77.1	0	0	0	64.4	0	120.8
ENSG00000284747	AL034417.4	0	0	0	0	0	0	0	0	0	0	1.3	0	0	0	0	0	0	0	0	0	0	0	0	0	0	0	0.9	0	0	0	0	0	0	0	0	0	0	0
ENSG00000284716	AL034417.3	0	0	0	0	0.7	0	1.3	0	0	2.7	2.6	1.1	0	0	0	0	0	0	147.6	0	0	0	0	0	0	0	0.9	0	0	0	0	0.4	0	0	0	0	0	0
ENSG00000116285	ERRFI1	12.2	13.9	25.5	18	24.6	67.2	49.2	64.3	89.2	23.1	38.3	59	142.1	438.1	0	213.3	0	32.3	66.1	0	0	262.6	10.9	0	33.8	3.8	64.1	0	69.1	40.7	0	163.9	0	0	0	0	0	0
ENSG00000232848	AL034417.1	0	1.5	0.7	0	0	0	0	0	0	0	0	1.1	1.7	0	0	1.2	0	0	0	0	0	0	0	0	0	0	0	0	0	0	0	0	0	0	0	0	0	0
ENSG00000227634	LINC01714	0	0	0	0	0	0	0	0	0	0	0	0	0	40.6	0	0	0	0	0	0	0	0	0	0	0	0	0	0	0	0	0	0	0	0	0	0	0	0
ENSG00000162426	SLC45A1	0	0	0	0	0	0	0	0	3.9	0	1.3	0	0	0	0	0	0	0	0	0	0	0	0	0	0	0	0	0	0	0	0	0	0	0	0	0	0	0
ENSG00000142599	RERE	83.3	80.4	112.1	60.7	103.4	141.7	34.5	61.3	95.7	57.8	45.9	57.8	126.5	4.1	107.6	528.2	108.4	485.1	334.9	412.7	119.7	5	43.7	0	17.7	3.8	82.2	0	22.1	32.7	195.9	225.8	0	0	0	64.4	0	40.3
ENSG00000232912	AL096855.1	0	0.7	0	0	0	0	0	0	0	0	0	0	0	0	0	0	0	0	0	0	0	0	0	0	0	3.8	0	0	0	0	0	0	0	0	0	0	0	0
ENSG00000221083	SNORA77	0	0	2.8	4.7	0	18.3	0	0	0	3.6	1.3	2.3	0	0	0	0	0	0	0	0	0	0	0	0	0	0	0	0	0	0	0	0	0	0	0	0	0	0
ENSG00000224315	RPL7P7	0	0.7	0	0	0	0	0	0	0	0	0	0	0	0	0	0	0	0	0	0	0	0	0	0	0	0	0	0	0	0	0	0	0	0	0	0	0	0
ENSG00000226545	AL357552.1	2	5.1	7.8	3.3	8.7	1.5	1.3	0	1.3	2.7	1.3	2.3	1.7	0	1.2	3.7	5.9	0	0	0	12.6	0	0	0	1.6	0	9.5	0	1.4	4.2	0	1.1	0	0	0	0	0	80.5
ENSG00000074800	ENO1	395.6	397	338.5	350.1	487.9	260	172.7	188.5	223.7	223.3	202.8	196.2	260	941.1	179.4	253	269.9	718.6	119	185.1	248.8	368.6	21.9	446.7	215.6	1272.8	471.7	1592.5	200.9	319.5	757.9	274.3	53.8	61.1	202.2	6503.5	60.2	1933.1
ENSG00000238249	HMGN2P17	0.7	0	0	0	0	0	0	0	0	0	0	0	0	0	0	0	0	0	0	0	0	0	0	0	0	0	0	0	0	0.2	0	0	0	0	0	0	0	0
ENSG00000232208	AL139415.1	10.2	5.8	5	0	0	4.4	17.3	6	0	6.2	6.4	10.2	0	0	0	55.8	221.6	0	0	0	0	0	0	0	0	0	0	0	0	0.2	41.4	0	0	0	0	0	0	0
ENSG00000142583	SLC2A5	22.4	21.9	12.1	40	51.3	20.4	0	6	0	3.6	2.6	10.2	0	0	93.3	45.9	345.4	0	0	0	0	0	0	0	0	0	1.7	0	0.7	0	0	0	0	0	0	64.4	0	40.3
ENSG00000180758	GPR157	1.4	8	13.5	2	0	39.4	26.6	7.5	32.3	19.6	28.1	22.7	383.1	0	0	0	0	0	72.7	0	0	5	0	0	37	0	37.2	0	0	22.4	0	11.1	0	0	0	0	0	80.5
ENSG00000228526	MIR34AHG	5.4	22.7	8.5	24	18.1	48.2	8	0	1.3	0.9	3.8	0	3.5	0	0	0	0	0	0	0	0	0	0	0	0	3.8	0	0	0	0	30.3	0	0	0	0	0	0	0
ENSG00000234546	LINC01759	5.4	0	4.3	0	0	0	0	0	0	0	0	1.1	0	0	0	0	0	0	0	0	0	0	0	0	0	0	0.9	0	0	0	0	9.3	0	0	0	0	0	0
ENSG00000049239	H6PD	38.6	64.3	67.4	60	82.4	78.1	10.6	15	24.6	47.2	14	13.6	107.5	16.2	252.3	176.1	445.6	64.7	33	0	434.6	10.1	10.9	5.4	17.7	3.8	69.2	0	48.5	43.6	1.6	41.9	0	61.1	0	0	0	0
ENSG00000171621	SPSB1	0	2.2	1.4	0	2.9	2.2	6.6	0	0	0	1.3	0	0	0	0	6.2	0	0	0	0	0	0	0	0	0	0	20.8	0	0	3.6	1.6	0	0	0	0	0	0	0
ENSG00000284693	AL928921.2	0	0	2.1	0	16.6	0	0	0	0	0	0	2.3	0	0	51.4	0	0	0	0	0	0	0	0	0	0	0	0	0	0	0	0	0	0	0	0	0	0	0
ENSG00000171612	SLC25A33	6.1	17.5	12.8	16	17.3	70.8	23.9	40.4	10.3	8	6.4	11.3	0	0	0	0	1.2	0	0	127.5	0	0	10.9	0	0	0	0.9	0	0	25.4	0	54.5	0	0	0	64.4	0	0
ENSG00000188807	TMEM201	19	11.7	19.2	0	18.8	17.5	8	6	11.6	3.6	2.6	11.3	0	0	0	0	0	0	0	0	0	0	0	0	0	0	0	0	0	5.2	0	0.7	0	0	0	0	0	0
ENSG00000171608	PIK3CD	33.9	57.8	41.2	44	55.7	69.4	4	9	0	6.2	0	17	0	0	4.8	53.3	0	0	0	139.6	0	0	0	0	122.3	7.6	90	0	0	35.2	0	14.8	0	0	134.8	0	0	0
ENSG00000179840	PIK3CD-AS1	0	0	0	3.3	0	0	0	0	0	0	0	0	0	0	0	0	0	0	0	0	0	0	0	0	0	0	0	0	0	0	0	0	0	0	0	0	0	0
ENSG00000233268	AL691449.1	0	4.4	0	0.7	0	0	0	0	0	0	0	0	0	0	0	0	0	0	0	0	0	0	0	0	0	0	0	0	0	0	0	0	0	0	0	0	0	0
ENSG00000231789	PIK3CD-AS2	16.9	2.2	2.8	0	0	0	0	0	1.3	0.9	0	0	0	0	0	0	0	0	0	0	0	0	0	0	0	0	0	0	0	0	0	0	0	0	0	0	0	0
ENSG00000171603	CLSTN1	30.5	40.9	58.9	59.3	44.1	65.7	81	88.2	89.2	86.3	75.2	63.5	1.7	150.1	57.4	193.4	129.7	86.2	44.1	0	144.9	0	21.9	294.1	32.2	113.3	19	5.3	72.7	81.2	78	73.4	0	61.1	67.4	0	0	0
ENSG00000178585	CTNNBIP1	0	32.2	58.9	33.3	26	24.8	26.6	7.5	19.4	29.4	33.2	26.1	0	0	0	0	0	0	0	0	0	0	0	397.6	0	0	0	585.3	0.7	35.7	0	26.7	0	0	0	0	0	0
ENSG00000162441	LZIC	19	16.8	0	6	19.5	9.5	4	15	3.9	10.7	3.8	9.1	0	0	0	0	0	0	0	0	0	0	0	0	0	0	30.3	0	0	0	0	14.1	0	0	0	0	0	0
ENSG00000228150	AL357140.2	0	0.7	0	0	0	0	0	0	0	0	0	0	0	0	0	0	0	0	0	0	0	0	0	0	0	0	0	0	0	0	0	0	0	0	0	0	0	0
ENSG00000173614	NMNAT1	12.2	5.1	9.9	10	31.8	2.9	1.3	10.5	9.1	0.9	1.3	7.9	1.7	0	0	0	1.2	97	0	0	0	0	0	0	3.2	0	19.9	0	1.4	7.8	0	1.5	0	0	0	0	0	0
ENSG00000202415	RN7SKP269	0	0.7	0	0	0	0	0	0	0	0	0	0	0	0	0	0	0	0	0	0	0	0	0	0	0	0	0	0	0	0	0	0	0	0	0	0	0	0
ENSG00000162444	RBP7	43.4	22.7	34.8	47.3	56.4	40.9	0	0	3.9	0	0	0	1.7	4.1	137.5	80.6	0	7.2	0	342.9	0	156.5	10.9	0	0	3.8	90.9	400.8	34.2	13	0	0	0	0	0	0	0	0
ENSG00000130939	UBE4B	52.8	49	63.2	47.3	82.4	21.9	18.6	9	18.1	35.6	15.3	18.1	0	117.6	110	0	0	122.2	0	185.1	229.9	0	10.9	0	61.1	3.8	52.8	0	55.6	0.2	0	69	0	0	0	0	0	0
ENSG00000224340	AL590639.1	0	0.7	0	0.7	0	0	0	0	0	0	0	0	0	0	0	0	0	0	0	0	0	0	0	0	0	0	0	0	0	0	0	0	0	0	0	0	0	0
ENSG00000201746	RNU6-828P	0	0	0	0	1.4	0	0	0	0	0.9	0	0	0	0	0	0	0	0	0	0	0	0	0	0	0	0	0	0	0	1.9	0	0	0	0	0	0	0	0
ENSG00000054523	KIF1B	54.9	46.8	50.4	40	78.1	48.2	9.3	3	9.1	13.3	17.9	14.7	0	0	0	0	1.2	0	0	0	0	0	21.9	0	0	0	104.7	0	3.6	1	9.6	13.3	0	0	0	0	0	40.3
ENSG00000199562	RNU6-37P	0	0	0	0	0	0	0	0	0	0	0	0	0	0	9.6	1.2	0	0	0	0	0	0	0	0	0	0	0	0	0	0	0	0	0	0	0	0	0	0
ENSG00000284735	AL139424.3	0	0	0	0	0.7	0	0	0	0	0	0	0	0	0	0	0	0	0	0	0	0	0	0	0	0	0	0	0	0	0	0	0	0	0	0	0	0	0
ENSG00000284642	AL139424.2	0	0	7.8	0	0	18.3	0	0	0	0	0	0	0	0	0	0	0	0	0	0	0	0	0	0	0	0	0	0	0	0	0	0	0	0	0	0	0	0
ENSG00000142657	PGD	45.4	108.2	79.5	48	81	86.9	39.9	23.9	16.8	30.2	16.6	28.4	41.6	12.2	1.2	53.3	170.9	172.5	266.6	0	560.5	419.1	21.9	0	32.2	166.2	174	5.3	79.1	29.6	0	23	0	1161.8	0	0	0	40.3
ENSG00000175279	CENPS	12.2	6.6	0	4.7	23.9	29.2	5.3	0	7.8	7.1	6.4	3.4	1.7	0	0	0	0	0	44.1	0	0	0	0	0	0	0	37.2	0	27.8	6.5	0	0	0	0	0	0	0	0
ENSG00000160049	DFFA	14.9	16.1	51.8	30.7	13.7	19.7	29.2	4.5	25.9	8	17.9	2.3	0	4.1	0	84.3	1.2	0	0	0	0	0	0	0	22.5	0	6.1	0	0	27.5	4.8	0	0	0	0	0	0	40.3
ENSG00000142655	PEX14	68.4	36.6	24.1	45.3	5.8	35.8	17.3	0	32.3	15.1	12.8	18.1	0	146	0	71.9	162.7	0	0	0	0	0	0	0	1.6	3.8	18.2	0	40.6	28.3	0	96.4	0	0	0	0	0	0
ENSG00000243267	RN7SL614P	0	0	0	0	0	0	0	0	0	0	0	0	0	0	0	0	0	0	0	6.1	0	0	0	0	0	0	0	0	0	0	0	0	0	0	0	0	0	0
ENSG00000130940	CASZ1	4.7	8.8	0	6	0.7	0	29.2	10.5	44	46.3	63.8	43.1	0	12.2	0	0	0	0	0	0	0	0	0	5.4	0	0	45	0	10.7	36.7	0	6.7	0	0	0	0	0	0
ENSG00000120948	TARDBP	84.7	73.8	84.4	97.4	94	159.2	53.1	31.4	46.5	77.4	43.4	46.5	0	73	62.2	545.6	29.5	212	0	154.8	170.1	616	32.8	0	136.8	0	32	0	13.5	70.3	0	43	0	0	67.4	0	120.5	0
ENSG00000009724	MASP2	0	0	0.7	0	0	0	0	0	0	0	0	0	0	0	0	0	0	0	0	0	0	0	0	0	0	0	0	0	4.3	0	0	0	0	0	0	0	0	0
ENSG00000116649	SRM	0.7	20.5	17.7	8.7	8.7	27.8	5.3	3	3.9	0	0	0	0	0	0	0	0	0	0	0	0	0	0	0	0	0	0	0	0	0	0	0	0	0	0	0	0	0
ENSG00000171824	EXOSC10	3.4	23.4	25.5	43.3	36.1	43.1	22.6	25.4	15.5	16.9	10.2	28.4	0	0	129.1	0	0	0	0	0	0	0	0	0	40.2	3.8	20.8	348	0	27.9	0	24.1	0	0	0	0	0	40.3
ENSG00000226849	AL109811.1	0	0	0	0	0	0	0	0	0	0	0	0	0	0	0	0	0	0	0	0	0	0	0	0	0	0	0	0	0	0	0	0	0	0	0	193.2	0	0
ENSG00000230337	AL109811.2	0	0.7	0	0	0	0	0	0	0	0	2.6	0	0	0	0	0	0	0	0	0	0	0	0	0	0	0	0	0	0	0	0	0	0	0	0	0	0	0
ENSG00000198793	MTOR	13.5	3.7	30.5	20.7	34.7	16.8	8	17.9	7.8	6.2	3.8	4.5	0	4.1	0	0	0	0	0	0	211	0	0	0	1.6	0	0	0	0	31.7	119.4	7.8	53.8	0	3235.6	0	0	0
ENSG00000120942	UBIAD1	9.5	21.2	5	5.3	5.1	22.6	2.7	6	2.6	3.6	1.3	29.5	0	0	0	0	0	0	0	0	0	0	0	0	140	3.8	0	0	0	10.5	0	0	0	0	0	0	0	0
ENSG00000238199	UBE2V2P3	0	0	0	0	0	0	0	0	0	0	0	0	0	0	0	0	0	0	0	0	0	0	0	0	0	0	0	116	0	0	0	0	0	0	0	0	0	0
ENSG00000204624	DISP3	0	0	0	0	0	0	0	0	0	0	0	0	0	0	0	0	0	0	0	0	0	0	0	0	0	0	0	0	0	0.2	0	0	0	0	0	0	0	0
ENSG00000116661	FBXO2	0	0	0	0	0	38.7	2.7	1.5	1.3	3.6	2.6	0	0	0	0	1.2	0	0	0	3	0	0	0	0	0	404.1	0	5.3	71.3	7.6	192.7	0	0	0	0	0	0	0
ENSG00000132879	FBXO44	1.4	3.7	4.3	3.3	6.5	26.3	0	4.5	9.1	13.3	5.1	5.7	0	0	0	0	0	115	2.2	0	0	0	0	0	0	0	0	0	41.3	5.9	0	0	0	0	0	0	0	0
ENSG00000116663	FBXO6	0	2.2	3.5	0	0	8	1.3	0	0	2.7	0	0	0	0	0	0	0	0	0	0	0	0	0	0	0	0	0	0	0	0	0	0	0	0	0	0	0	0
ENSG00000116670	MAD2L2	10.8	23.4	7.8	14.7	0	4.4	14.6	15	9.1	7.1	2.6	9.1	0	0	0	0	0	0	0	0	0	5	0	0	69.2	0	0	0	22.1	0	0	30	0	0	0	0	0	0
ENSG00000162490	DRAXIN	0	0	0	0	0	3.7	0	0	0	0	0	0	0	0	0	0	0	0	0	0	0	0	0	0	0	0	0	0	0	0	0	23	0	0	0	0	0	0
ENSG00000177674	AGTRAP	19	27.8	57.5	20	11.6	62.8	37.2	12	14.2	28.5	7.7	18.1	0	4.1	61	0	48.3	0	0	103.2	75.6	0	0	0	0	0	76.2	0	37.1	11.7	1.6	0	0	0	0	0	0	40.3
ENSG00000177000	MTHFR	28.5	19	20.6	29.3	13	21.9	18.6	10.5	5.2	13.3	17.9	3.4	97.1	0	131.5	11.2	135.6	0	0	0	0	0	0	0	0	0	46.7	363.8	0	10.9	0	0	0	0	0	0	0	0
ENSG00000011021	CLCN6	6.1	21.2	23.4	1.3	17.3	21.2	4	0	1.3	8	8.9	7.9	0	0	59.8	0	0	0	0	139.6	0	0	10.9	0	54.7	0	0	0	165.3	7.6	0	0	0	0	0	0	0	80.5
ENSG00000242349	NPPA-AS1	0	0	0	0	5.8	0	0	7.5	0	0	5.1	0	0	0	0	0	0	0	0	0	0	0	0	0	0	0	0	0	0	0	0	0	0	0	0	0	0	0
ENSG00000116685	KIAA2013	41.3	39.5	51.8	58.7	56.4	23.4	22.6	17.9	23.3	30.2	14	12.5	1.7	44.6	0	42.2	89.6	3.6	2.2	0	0	0	0	0	0	7.6	27.7	0	46.3	42	0	32.3	0	0	0	0	0	0
ENSG00000083444	PLOD1	4.7	6.6	29.1	22	13	16.1	8	9	22	4.4	1.3	0	1.7	0	0	0	0	0	0	0	0	0	0	0	0	0	0	0	0	0.2	0	0	0	0	0	0	0	0
ENSG00000116688	MFN2	88.1	52.6	36.2	45.3	35.4	67.9	41.2	6	58.2	24.9	38.3	32.9	0	4.1	116	57	66	0	163	3	148	5	10.9	0	0	302.1	112.5	0	122.6	57.7	0	7	0	0	67.4	0	0	0
ENSG00000116691	MIIP	6.1	5.1	8.5	20.7	0.7	2.9	0	0	5.2	0	2.6	1.1	0	0	0	0	0	0	0	0	0	0	0	70.8	0	0	6.1	0	0	0	0	0	0	0	0	0	0	0
ENSG00000243539	RN7SL649P	0	0	0	0	0	0	0	0	0	0.9	0	0	0	0	0	0	0	0	0	0	0	0	0	0	0	0	0	0	0	0	0	0	0	0	0	0	0	0
ENSG00000120949	TNFRSF8	0	13.9	10.6	26	0	0	0	0	0	2.7	0	3.4	0	0	0	0	0	0	0	0	0	0	0	0	0	3.8	0	0	0	0	0	0	0	0	0	0	0	0
ENSG00000028137	TNFRSF1B	35.9	85.5	86.6	61.3	56.4	146.1	8	1.5	3.9	15.1	3.8	6.8	0	0	172.2	171.1	102.6	0	123.4	15.2	371.6	0	0	0	83.7	0	316.8	432.4	59.1	20.8	0	23	0	550.3	0	64.4	0	80.5
ENSG00000048707	VPS13D	10.2	46.1	30.5	20	34	38.7	30.6	20.9	10.3	10.7	17.9	15.9	104	0	0	0	0	0	0	0	399.9	0	0	0	0	0	31.2	0	0	30.2	186.3	15.2	0	0	0	0	0	0
ENSG00000162496	DHRS3	0	3.7	7.1	16.7	9.4	0	8	15	0	6.2	0	0	0	0	0	140.1	0	0	0	0	0	0	0	0	0	0	0	0	0	0	0	0	0	0	0	0	0	0
ENSG00000272482	AC254633.1	0	0	6.4	0	0	0	0	0	0	0	0	0	0	0	0	0	0	0	0	0	0	0	0	0	0	0	0	0	0	0	0	0	0	0	0	0	0	0
ENSG00000274178	PRAMEF28P	0	0	0	0	0	0	0	0	0	0	0	0	0	0	1.2	0	0	0	0	0	0	0	0	0	0	0	0	0	0	0	0	0	0	0	0	0	0	0
ENSG00000179412	HNRNPCL4	0	0	1.4	0	0	0	0	0	0	0	0	0	0	0	0	0	0	0	0	0	0	0	0	0	0	0	0	0	0	0	0	0	0	0	0	0	0	0
ENSG00000207511	RNU6-771P	0	0	0	0	0	0	0	0	0	0	1.3	0	0	0	0	0	0	0	0	0	0	0	0	0	0	0	0	0	0	0	0	0	0	0	0	0	0	0
ENSG00000204480	PRAMEF19	0	0	0	0	0	0	0	0	0	0	0	0	0	0	0	0	0	0	0	0	0	0	0	0	0	0	0	0	0	0	0	0	753.6	0	0	0	0	0
ENSG00000162493	PDPN	9.5	63.6	54.6	28	98.3	71.6	12	0	1.3	28.5	0	7.9	0	0	202.1	0	71.9	0	4.4	100.2	0	0	0	0	3.2	0	15.6	0	0	40.3	108.3	15.9	0	0	0	0	0	0
ENSG00000237445	AL359771.1	0	0	0	0	0	0	0	0	1.3	0	0	0	0	0	0	0	0	0	0	0	0	0	0	0	0	0	0	0	0	0	0	0	0	0	0	0	0	0
ENSG00000116731	PRDM2	110.4	72.4	75.9	56.7	117.1	54	35.9	10.5	31	33.8	14	46.5	3.5	4.1	26.3	169.9	207.5	0	85.9	94.1	0	50.5	10.9	201.5	38.6	3.8	118.6	5.3	12.8	35.9	89.2	57.8	0	244.6	0	0	0	0
ENSG00000189337	KAZN	0	0	0	6	13.7	2.9	2.7	3	1.3	12.5	0	3.4	0	0	0	22.3	0	0	0	0	0	0	0	130.7	0	0	0.9	0	0	0	0	10.8	0	0	0	0	0	0
ENSG00000235829	TBCAP2	0	1.5	0	0.7	0	0	2.7	0	0	1.8	6.4	2.3	1.7	0	0	0	42.4	0	0	0	0	0	0	0	0	0	0.9	0	0	1.7	0	0	0	0	0	0	0	0
ENSG00000175147	TMEM51-AS1	0	0	2.8	0	0	0	4	4.5	0	0	0	0	0	0	0	0	0	0	0	0	0	0	0	0	0	0	0	0	0	0	0	0	0	0	0	0	0	0
ENSG00000171729	TMEM51	96.2	92.1	92.3	76.7	56.4	132.2	33.2	47.9	28.4	55.2	35.7	43.1	235.7	4.1	0	22.3	0	3.6	705	3	85	0	10.9	207	1.6	3.8	54.5	0	71.3	36.7	39.8	69	0	0	0	0	0	40.3
ENSG00000215720	AL035405.1	0	0	0	0	0	0	0	0	0	0	0	0	0	0	22.7	0	0	0	0	0	0	0	0	0	0	0	0	0	0	0	0	0	0	0	0	0	0	0
ENSG00000142621	FHAD1	33.2	5.8	18.5	10.7	21.7	8.8	2.7	0	0	8	6.4	9.1	112.7	0	0	0	0	0	0	0	0	0	0	0	0	0	0	0	0.7	0	0	1.9	0	0	0	0	0	0
ENSG00000142634	EFHD2	90.1	86.3	98.6	70.7	82.4	35.1	13.3	1.5	12.9	27.6	23	26.1	34.7	4.1	214	32.2	193.3	64.7	101.3	0	0	146.4	0	201.5	64.4	3.8	283	0	16.4	38.4	58.9	38.6	0	0	0	0	0	80.5
ENSG00000142615	CELA2A	0	0.7	0.7	0	1.4	0	0	0	0	0	0	0	0	0	0	0	0	0	0	0	0	0	0	0	0	0	0	0	0	0.2	0	0	0	0	0	0	0	0
ENSG00000132906	CASP9	15.6	10.2	1.4	11.3	0	30.7	0	0	22	7.1	2.6	0	0	0	0	188.5	0	0	0	0	0	0	21.9	0	0	0	0	0	0	0	0	0	0	0	0	0	0	0
ENSG00000116138	DNAJC16	44	7.3	17.7	32.7	26	27	0	35.9	7.8	14.2	14	3.4	69.3	0	0	0	77.8	0	0	0	0	15.1	0	0	0	0	0	0	0	0.2	0	1.5	0	0	0	0	0	0
ENSG00000272510	AL121992.3	0	0	0	0	0	0	0	0	0	0	0	0	0	0	0	0	0	0	0	0	0	0	0	0	0	0	0.9	0	0	0	0	0	0	0	0	0	0	0
ENSG00000116771	AGMAT	0	0	0.7	0	0	0	0	0	0	0	0	0	0	0	0	0	0	0	0	0	0	0	0	0	0	0	0	0	0	0	0	0	0	0	0	0	0	0
ENSG00000235084	CHCHD2P6	0	0.7	3.5	0.7	0	0	6.6	0	0	2.7	0	2.3	0	0	71.7	0	0	0	0	0	0	0	0	0	0	0	0	0	0	0	0	0	0	0	0	0	0	0
ENSG00000197312	DDI2	63.7	48.3	44.7	71.3	52.8	76.7	17.3	19.4	18.1	30.2	23	52.2	0	328.6	31.1	34.7	0	75.5	0	39.5	69.3	373.6	0	0	1.6	0	21.6	5.3	5	8	1.6	8.2	0	0	0	0	0	0
ENSG00000116786	PLEKHM2	16.3	28.5	10.6	46.7	11.6	51.9	0	0	1.3	1.8	3.8	9.1	0	0	19.1	0	0	0	30.8	0	0	0	0	0	0	0	11.3	0	21.4	14.9	0	0	0	0	0	0	0	0
ENSG00000162461	SLC25A34	0	5.1	2.1	12	0	0	2.7	1.5	0	0	1.3	0	0	0	0	0	0	0	0	0	0	0	0	0	0	0	0	0	0	0	0	0	0	0	0	0	0	0
ENSG00000162458	FBLIM1	5.4	11.7	20.6	14	62.9	48.9	8	20.9	22	3.6	6.4	7.9	0	0	59.8	0	0	0	0	3	0	0	0	0	22.5	0	0	0	12.1	14.1	0	0.4	0	0	0	0	0	0
ENSG00000224321	RPL12P14	5.4	2.2	2.8	0	2.9	0	0	4.5	0	0	0	0	0	0	0	0	3.5	0	0	0	0	0	0	0	0	0	0.9	0	1.4	0.4	0	1.5	0	0	0	0	0	0
ENSG00000233954	UQCRHL	38.6	76.8	100.8	104	107.7	95.7	196.6	149.6	174.5	159.3	207.9	95.3	0	8.1	52.6	73.2	46	212	156.4	352	0	0	43.7	0	135.1	11.3	124.6	0	79.1	158.4	1.6	192.8	0	0	0	0	60.2	40.3
ENSG00000178715	AL450998.1	100.3	121.4	70.3	80	154	133.6	75.7	71.8	44	52.5	30.6	86.2	0	20.3	1.2	295.1	126.1	3.6	1026.6	904.4	0	5	0	0	0	0	143.7	121.3	225.9	64	51	95.3	0	0	0	64.4	0	0
ENSG00000065526	SPEN	19.6	32.2	46.1	31.3	18.1	15.3	35.9	61.3	19.4	16.9	24.2	31.8	1.7	0	145.9	0	148.5	0	143.2	66.8	94.5	5	0	0	218.8	3.8	34.6	189.8	40.6	32.1	0	25.2	0	0	0	0	0	0
ENSG00000270620	AL034555.1	0	0	2.1	0.7	0	0	0	0	0	0	0	0	0	0	0	0	0	0	0	0	0	0	0	0	0	0	0	0	0	0	0	0	0	0	0	0	0	0
ENSG00000116809	ZBTB17	0	0	0	0	0	0	0	0	1.3	0	0	0	0	0	0	0	0	0	0	0	0	0	0	0	0	0	0	0	0	0	0	0	0	0	0	0	0	0
ENSG00000183888	SRARP	0	0	0	0.7	0	0	14.6	10.5	7.8	16.9	2.6	19.3	0	0	0	0	0	0	0	0	0	0	10.9	0	98.1	0	0	0	2.1	0	0	0	0	0	0	0	0	0
ENSG00000173641	HSPB7	54.2	11.7	38.3	19.3	138.1	60.6	1.3	3	0	1.8	1.3	2.3	218.4	0	217.6	23.6	386.6	0	156.4	327.8	173.2	0	21.9	0	0	11.3	71.8	453.5	0	9.6	66.9	76.4	53.8	61.1	0	0	0	40.3
ENSG00000186510	CLCNKA	3.4	1.5	0	0	0	0	0	0	1.3	3.6	10.2	3.4	0	0	0	0	0	0	0	0	0	0	0	0	0	0	0.9	0	0	9	0	0	0	61.1	0	0	0	0
ENSG00000185519	FAM131C	0	0	0.7	0	0	0	0	0	0	0	0	0	0	0	0	0	0	0	0	0	0	0	0	0	0	0	0	0	0	0	0	0	0	0	0	0	0	0
ENSG00000142627	EPHA2	0	11.7	3.5	0	8	5.1	10.6	0	3.9	1.8	3.8	3.4	0	0	0	0	81.3	0	180.7	0	0	0	0	0	0	0	0	0	0	8	0	0	0	0	0	0	0	0
ENSG00000142632	ARHGEF19	0	9.5	4.3	1.3	0	0	0	28.4	7.8	11.6	16.6	18.1	0	4.1	37.1	0	0	0	0	0	0	0	0	0	93.3	0	0	0	0	17.6	0	0	0	0	0	0	0	0
ENSG00000237276	ANO7L1	0	10.2	0	0	0	0	0	0	0	0	0	0	0	0	0	0	0	0	0	0	0	0	0	0	0	0	0	0	0	0	0	22.6	0	0	0	0	0	0
ENSG00000132881	RSG1	0	0	0	0	0	0	0	0	0	3.6	0	0	0	0	0	0	0	0	0	0	0	0	0	0	0	0	0	0	0	0	0	0	0	0	0	0	0	0
ENSG00000233929	MT1XP1	0.7	0	5.7	0	2.2	0	0	0	0	0	0	3.4	1.7	0	0	0	0	0	0	0	0	0	0	0	0	0	71	0	1.4	0.2	0	0.4	0	0	0	0	0	0
ENSG00000037637	FBXO42	19.6	27.1	15.6	10	8.7	8	19.9	6	10.3	20.5	5.1	11.3	0	0	126.7	18.6	0	0	0	0	0	0	10.9	0	0	3.8	39	0	0	0.2	0	35.6	0	0	0	0	0	0
ENSG00000055070	SZRD1	116.5	95.8	46.8	94.7	122.2	67.9	34.5	25.4	56.9	79.2	30.6	55.6	275.6	4.1	167.4	119	142.6	50.3	310.6	166.9	207.8	878.6	65.6	0	38.6	7.6	60.6	0	24.2	62.9	248.4	59.3	53.8	61.1	0	0	0	0
ENSG00000226457	AL358794.1	13.5	15.4	29.8	16	15.2	8.8	6.6	6	2.6	3.6	12.8	9.1	5.2	0	4.8	27.3	0	3.6	6.6	0	15.7	15.1	0	0	11.3	211.5	30.3	47.5	23.5	8.6	25.5	15.6	0	0	67.4	0	0	0
ENSG00000187144	SPATA21	0.7	0	0	0	0	0	0	0	0	0	0	0	0	0	0	0	0	0	0	0	0	0	0	0	0	0	0	0	0	0	0	0	0	0	0	0	0	0
ENSG00000157191	NECAP2	90.1	85.5	79.5	64	92.5	140.2	6.6	4.5	15.5	27.6	11.5	30.6	0	4.1	50.2	94.2	465.6	25.2	0	0	667.6	0	10.9	141.6	0	0	122	5.3	36.3	26.2	1.6	38.6	53.8	0	0	0	240.9	40.3
ENSG00000226029	LINC01772	2	1.5	0	0	1.4	0	4	0	0	0.9	0	0	123.1	0	0	0	0	0	0	0	0	0	0	0	0	0	0	0	0.7	0	0	0	0	0	0	0	0	0
ENSG00000080947	CROCCP3	10.8	7.3	2.8	0	0.7	46	0	0	2.6	4.4	0	1.1	0	0	0	0	0	0	0	0	9.4	0	0	0	0	3.8	0	0	8.6	2.3	0	0.7	0	0	0	0	0	0
ENSG00000224174	AL137802.1	0	2.9	0	6	0	0	0	0	1.3	0	5.1	1.1	0	0	0	0	0	0	0	0	151.2	0	0	0	1.6	0	31.2	0	0	7.6	0	0	0	0	0	0	0	0
ENSG00000219481	NBPF1	99.6	81.9	68.1	98	91.1	108.8	27.9	12	12.9	7.1	15.3	28.4	93.6	12.2	7.2	24.8	0	237.1	0	3	59.8	0	0	0	0	0	0.9	36.9	37.1	3.6	0	1.5	0	0	0	0	0	0
ENSG00000215908	CROCCP2	2	16.8	28.4	6	8	13.1	8	6	2.6	9.8	12.8	1.1	0	8.1	0	0	0	0	0	3	0	0	0	0	0	3.8	36.4	0	9.3	17	0	47.5	0	0	0	0	0	40.3
ENSG00000186301	MST1P2	0.7	10.2	14.9	0	0	0	1.3	0	5.2	0	1.3	0	0	0	0	0	0	0	0	0	0	0	0	0	0	0	0	1044.1	0	10.5	0	33.4	0	0	67.4	0	0	0
ENSG00000236698	EIF1AXP1	23.7	5.1	12.8	11.3	8	24.8	12	0	14.2	11.6	26.8	6.8	0	0	0	0	0	0	0	0	12.6	0	0	0	0	0	13	0	0	7.3	0	37.8	0	0	0	0	0	0
ENSG00000279151	AL021920.1	0	0	0	0	0	0	0	0	0	0.9	0	0	0	0	0	0	0	0	0	0	0	0	0	0	0	0	0	0	0	0	0	0.7	0	0	0	0	0	0
ENSG00000058453	CROCC	3.4	17.5	20.6	16	0	0	9.3	7.5	2.6	3.6	8.9	3.4	0	0	0	0	1.2	0	0	0	0	0	0	0	0	0	0	0	0	0	0	0	0	0	0	0	0	0
ENSG00000207389	RNU1-4	0	0	0	2.7	0	0	0	0	0	0	0	0	0	0	0	0	0	0	0	0	0	0	0	0	0	0	0	0	0	0	0	0	0	0	0	0	0	0
ENSG00000186715	MST1L	0.7	0	0	0	8	0	2.7	0	1.3	0	0	0	0	0	0	0	0	0	0	0	0	0	0	130.7	0	0	0	0	0	0	0	0	0	0	0	0	0	0
ENSG00000238142	BX284668.5	16.3	15.4	11.4	4	0.7	0.7	6.6	0	7.8	0	1.3	0	0	0	0	0	0	0	0	0	0	0	0	0	0	0	3.5	0	0	0	8	0	0	0	0	0	0	0
ENSG00000159363	ATP13A2	0	2.9	9.9	0	22.4	0	13.3	0	1.3	3.6	5.1	0	0	0	0	0	0	0	0	0	0	0	0	0	0	0	0	0	0	0.6	0	0	0	0	0	0	0	0
ENSG00000117118	SDHB	79.3	58.5	33.4	68	69.4	40.2	25.2	13.5	18.1	14.2	10.2	6.8	67.6	121.7	46.6	0	21.2	0	0	0	0	1065.4	0	0	0	7.6	0	0	24.2	14.1	0	26.7	0	0	0	0	0	0
ENSG00000117115	PADI2	35.2	19	15.6	30.7	0	20.4	296.2	181	389.2	263.3	309.9	309.6	3.5	48.7	0	2.5	0	3.6	0	6.1	0	0	0	136.2	0	136	3.5	0	34.9	284	6.4	332.2	0	61.1	0	0	0	0
ENSG00000204362	AL590644.1	0	0	0	0	0	0	1.3	0	0	0	0	0	0	0	0	0	0	0	0	0	0	0	0	0	0	0	0	0	0	0	0	0	0	0	0	0	0	0
ENSG00000282843	AL590644.3	0	0	0	0	0	0	0	0	0	0	0	0	0	0	0	0	0	0	0	0	0	0	0	0	0	0	0.9	0	0	0	0	0	0	0	0	0	0	0
ENSG00000142623	PADI1	0	0	0	0	0	0	1.3	0	0	0	6.4	0	0	0	0	0	0	0	0	0	0	0	10.9	0	0	0	0	0	0	0	0	19.6	0	0	0	0	0	0
ENSG00000159339	PADI4	0	0	0	0	0	0	0	0	0	0	2.6	0	0	0	0	0	0	0	0	0	0	0	0	0	0	0	0	0	0	0	0	0	0	0	0	0	0	0
ENSG00000179051	RCC2	61	57.8	53.9	50	63.6	47.5	70.4	35.9	41.4	45.4	25.5	40.8	0	4.1	102.8	0	106.1	3.6	0	0	0	0	0	0	59.5	3.8	53.7	0	24.9	78.7	3.2	52.6	0	61.1	0	64.4	0	40.3
ENSG00000074964	ARHGEF10L	21.7	57.8	49.7	41.3	41.2	70.1	34.5	12	14.2	10.7	31.9	31.8	145.6	0	178.2	0	0	0	41.9	0	0	0	0	0	0	196.4	23.4	0	55.6	29.6	0	0	0	0	0	64.4	0	0
ENSG00000117154	IGSF21	0	0	0	0	0	0	0	0	5.2	0.9	5.1	0	8.7	0	0	0	0	0	0	0	0	0	0	228.8	0	0	26	0	0	9.4	0	0	0	0	0	0	0	0
ENSG00000179023	KLHDC7A	4.7	0	0	0	0	0	0	0	2.6	0.9	2.6	0	0	0	0	0	0	0	0	0	0	0	0	0	0	0	0	0	0	0	0	0.4	0	0	0	0	0	0
ENSG00000235282	DYNLL1P3	0	0	0	0	0	0	0	0	0	0	0	0	0	0	0	0	0	0	0	0	0	0	0	0	0	0	0	0	0	0	0	0.7	0	0	0	0	0	0
ENSG00000009709	PAX7	0	0	0	0	5.1	0	0	0	1.3	0	3.8	0	0	0	0	0	0	0	0	0	0	0	0	0	0	0	0	0	0	2.5	0	0	0	0	0	0	0	0
ENSG00000159423	ALDH4A1	54.9	33.6	33.4	22.7	21.7	11.7	59.8	74.8	38.8	32.9	42.1	32.9	0	4.1	6	0	0	0	85.9	0	157.5	0	0	174.3	1.6	0	34.6	0	0	57.5	264.3	14.1	0	122.3	0	0	0	40.3
ENSG00000169991	IFFO2	0	14.6	0.7	8.7	0	16.8	18.6	13.5	3.9	2.7	2.6	1.1	183.7	0	0	0	0	0	0	0	0	0	0	0	0	0	0	0	0	0.2	168.8	31.9	0	0	0	0	0	0
ENSG00000127481	UBR4	10.2	10.2	21.3	15.3	13.7	0.7	0	9	5.2	12.5	6.4	3.4	0	0	0	0	0	0	0	0	0	0	0	0	1.6	0	39	0	0	18.5	264.3	0	0	0	0	0	0	0
ENSG00000230424	AL035413.1	0	0	0	6	0	4.4	0	0	0	0	0	0	0	0	0	0	0	0	0	0	0	0	0	0	0	0	0	0	0	0	0	0	0	0	0	0	0	0
ENSG00000127463	EMC1	41.3	21.2	22	18.7	18.8	16.1	10.6	3	7.8	8	21.7	9.1	0	0	0	194.7	0	230	85.9	0	94.5	0	10.9	0	0	0	21.6	0	0	2.7	0	0.7	0	0	0	0	0	0
ENSG00000053372	MRTO4	10.2	14.6	19.9	18	18.1	29.9	10.6	35.9	23.3	8.9	2.6	11.3	0	8.1	0	90.5	166.2	0	0	0	0	0	21.9	0	0	0	0.9	0	0	7.6	0	8.2	0	0	0	0	0	0
ENSG00000211454	AKR7L	0	0	1.4	6.7	0	0	0	3	5.2	2.7	1.3	0	0	0	1.2	1.2	140.3	0	0	0	0	0	0	0	0	0	0.9	0	0	0	0	0	0	0	0	0	0	0
ENSG00000162482	AKR7A3	0	3.7	0	2.7	0	0	26.6	22.4	27.2	0.9	28.1	15.9	0	0	50.2	0	0	0	0	0	0	0	0	0	0	0	0	0	0.7	0	0	0	0	0	0	0	0	0
ENSG00000053371	AKR7A2	11.5	47.5	23.4	26	28.2	26.3	6.6	0	2.6	16.9	20.4	15.9	0	133.9	0	0	0	0	0	0	0	247.4	10.9	0	0	0	0	0	0	22	0	0.4	0	61.1	0	0	0	0
ENSG00000200403	RNU6-1099P	0	0	0	0	0	0	0	0	0	0	0	2.3	0	0	0	3.7	0	0	0	0	0	0	0	0	0	0	0	0	0	0	0	0	0	0	0	0	0	0
ENSG00000077549	CAPZB	140.2	204	139.1	190	96.9	83.3	85	13.5	40.1	97.9	48.5	46.5	313.7	166.3	33.5	137.6	64.8	3.6	356.9	24.3	0	373.6	10.9	370.4	14.5	11.3	270.1	5.3	43.5	65	359.9	93.8	0	0	0	0	0	80.5
ENSG00000173436	MINOS1	50.8	54.8	39	66	47	78.9	12	13.5	23.3	15.1	17.9	21.5	0	4.1	190.1	1.2	0	0	0	0	0	0	0	5.4	32.2	0	24.2	279.5	2.9	23.1	0	131.6	0	0	0	0	0	0
ENSG00000226396	AL031727.1	605.7	704.1	630.9	664.8	545.7	620.8	835.6	777.8	814.5	581.9	779.1	706.6	565.1	661.2	315.7	254.2	284.1	438.3	901.1	21.2	324.4	277.7	43.7	926	897.7	487.2	424.1	627.5	360.6	754.6	649.7	800.4	107.7	733.8	134.8	64.4	240.9	120.8
ENSG00000158747	NBL1	107.7	119.9	130.6	120.7	133	117.6	21.3	32.9	16.8	41.8	19.1	32.9	19.1	142	229.6	359.6	0	524.6	149.8	69.8	746.3	50.5	32.8	0	1.6	0	64.1	21.1	10.7	53.5	186.3	63.4	0	61.1	67.4	0	0	40.3
ENSG00000162542	TMCO4	22.4	21.9	22	19.3	13	1.5	9.3	3	3.9	8	11.5	0	1.7	12.2	0	65.7	68.4	0	0	3	0	0	0	0	0	0	26.8	0	111.2	16.6	0	41.2	0	0	0	0	0	0
ENSG00000235434	AL391883.1	0	0	0	0	0	0	0	0	0	0	0	0	0	0	0	0	0	0	0	0	0	0	0	0	0	0	14.7	0	0	0	0	0	0	0	0	0	0	40.3
ENSG00000169914	OTUD3	3.4	0	0	9.3	0	0	0	0	1.3	0.9	0	0	0	0	0	0	0	0	189.5	0	0	5	0	0	0	7.6	0	0	235.9	0	0	0	0	0	0	0	0	0
ENSG00000188257	PLA2G2A	0	1.5	1.4	2.7	18.1	0	0	0	0	6.2	0	0	0	8.1	43	93	124.9	186.8	0	0	0	0	0	0	0	0	0	5.3	0	0	445.8	37.8	0	0	0	0	0	0
ENSG00000127472	PLA2G5	0	0	0	0	0	0.7	0	0	0	0	0	0	0	0	0	0	0	0	0	0	0	0	0	0	0	0	0	0	0	0	0	0	0	0	0	0	0	0
ENSG00000158786	PLA2G2F	0	0	0	0	0	0	2.7	0	0	0	1.3	0	0	0	0	0	0	0	0	0	0	0	0	0	0	0	0	0	0	0	0	0	0	0	0	0	0	0
ENSG00000187980	PLA2G2C	0	0	0	0	0	0	0	0	0	0	0	0	0	0	0	0	0	0	0	0	0	0	0	0	0	0	0	0	0	0.2	0	0	0	0	0	0	0	0
ENSG00000225986	UBXN10-AS1	0	6.6	0	3.3	0	0	6.6	0	0	0.9	0	0	0	0	0	0	0	0	0	0	0	0	0	0	0	0	0	0	0	0	0	0	0	0	0	0	0	0
ENSG00000162543	UBXN10	8.8	0	0	0	0	0	0	0	1.3	3.6	0	1.1	0	0	0	0	0	0	0	0	0	0	0	0	0	0	0	0	0	0	0	0	0	0	0	0	0	0
ENSG00000162545	CAMK2N1	30.5	60.7	69.5	55.3	55.7	46	265.7	176.5	234	108.5	298.4	186	38.1	12.2	114.8	26	338.3	0	244.5	0	91.3	1423.9	787.2	223.3	210.8	147.3	62.3	89.6	153.2	310.9	138.5	345.2	53.8	1345.2	0	0	60.2	40.3
ENSG00000090432	MUL1	12.2	33.6	43.3	15.3	43.4	46.7	8	12	6.5	11.6	20.4	19.3	0	0	0	21.1	0	0	0	0	0	0	0	0	1.6	0	21.6	0	1.4	5.9	159.2	18.5	0	0	0	0	0	0
ENSG00000183114	FAM43B	0	5.1	8.5	3.3	0	0	0	0	0	0	0	6.8	0	0	29.9	0	0	0	0	0	192.1	0	0	0	0	0	0	0	0	0	0	0	0	0	0	0	0	0
ENSG00000158825	CDA	0	0.7	0.7	0	0	0	0	0	1.3	3.6	0	1.1	0	0	0	0	0	0	0	0	856.6	0	0	0	0	0	1.7	0	0	0	0	29.3	0	0	0	0	0	0
ENSG00000158828	PINK1	44	30.7	38.3	16.7	49.9	22.6	8	12	10.3	19.6	16.6	14.7	0	0	69.4	0	0	0	0	0	0	0	0	0	0	0	24.2	0	1.4	13	0	57.1	0	0	0	64.4	0	0
ENSG00000117242	PINK1-AS	0	0	2.8	0	0	0	10.6	0	0	0	0	6.8	0	0	0	91.8	0	0	0	0	0	0	0	0	0	0	0	0	0	8.8	0	0	0	0	0	0	0	0
ENSG00000244038	DDOST	56.9	85.5	73.1	69.3	101.2	157.7	85	73.3	106	97.9	81.6	106.6	3.5	8.1	2.4	73.2	11.8	122.2	57.3	91	346.4	0	109.3	119.8	20.9	11.3	45.9	5.3	39.9	50.8	418.8	107.5	0	0	0	0	0	0
ENSG00000117245	KIF17	0	2.2	0	0	0	0	0	0	0	0	0	0	0	0	0	0	0	0	0	0	0	0	0	0	0	0	26.8	0	0	0	0	0	0	0	0	0	0	40.3
ENSG00000235432	AL663074.2	0	10.2	0	0	0	0	6.6	0	3.9	3.6	0	4.5	0	0	0	0	0	0	0	0	0	0	0	0	0	0	0	0	0	1.5	0	0	0	0	0	0	0	0
ENSG00000189410	SH2D5	0	0.7	0	0	0	0	0	0	0	0	0	0	0	0	0	0	0	0	0	0	0	0	0	0	0	0	0	0	0	0	0	0	0	0	0	0	0	0
ENSG00000127483	HP1BP3	115.8	155	137.7	109.4	180	254.9	57.1	28.4	36.2	64.9	47.2	48.8	327.6	535.4	243.9	114.1	458.5	0	244.5	191.2	510.2	10.1	10.9	130.7	159.3	3.8	102.1	42.2	69.8	67.1	267.5	39.3	0	0	67.4	0	0	40.3
ENSG00000075151	EIF4G3	140.2	100.9	169.6	105.4	177.8	50.4	95.6	43.4	59.5	55.2	53.6	98.7	79.7	81.1	196.1	42.2	1.2	0	44.1	0	248.8	0	0	299.6	30.6	7.6	69.2	5.3	0	103.8	697.4	74.9	0	61.1	134.8	64.4	0	40.3
ENSG00000233072	RPS15AP6	0	0	0.7	0	9.4	0	0	0	0	0	0	0	0	0	0	0	0	0	0	0	0	0	0	0	0	0	0	0	0	0	0	0	0	0	0	0	0	0
ENSG00000117298	ECE1	10.8	13.2	39	26	44.8	68.6	126.2	139.1	113.8	40.9	100.7	70.3	1.7	255.5	185.3	147.6	43.6	0	301.8	0	0	0	0	0	0	3.8	107.3	5.3	307.1	98.8	106.7	91.9	0	61.1	0	128.8	0	80.5
ENSG00000231105	AL031728.1	0	0	0	0	0	0	0	0	0	0	0	0	0	0	0	0	0	0	0	0	0	0	0	0	1.6	0	0	0	0	0	0	0	0	0	0	0	0	0
ENSG00000236216	PPP1R11P1	0	0	0	2.7	3.6	0	0	0	0	0	0	3.4	0	0	0	0	0	0	0	0	0	0	0	0	0	0	0	0	0	0	0	0	0	0	0	0	0	0
ENSG00000227001	NBPF2P	0	0	0	0	0	0	4	0	0	0	1.3	1.1	0	0	0	0	0	0	0	0	0	0	0	0	0	0	0	0	0	0	0	0	0	0	0	0	0	0
ENSG00000142794	NBPF3	20.3	6.6	9.2	2.7	21	0.7	1.3	1.5	6.5	5.3	6.4	5.7	0	0	0	0	0	28.7	0	0	0	0	0	0	0	0	19	0	2.1	0.6	0	0.4	0	0	0	0	0	0
ENSG00000162551	ALPL	30.5	38	48.3	38	20.2	62.8	9.3	0	1.3	0	0	3.4	1.7	0	98	62	66	0	123.4	0	0	0	10.9	0	0	0	193	0	0	0	0	0.4	0	0	0	0	0	0
ENSG00000076864	RAP1GAP	0	0	5	0	0	0	15.9	34.4	15.5	27.6	37	9.1	1.7	0	0	0	0	0	0	0	0	0	10.9	0	0	0	0	0	0	15.3	0	63.8	0	0	0	0	0	0
ENSG00000090686	USP48	20.3	66.5	65.3	21.3	17.3	38	8	7.5	10.3	28.5	26.8	20.4	1.7	0	35.9	44.6	43.6	0	0	0	0	0	10.9	0	225.2	3.8	0	31.6	34.9	29.4	269.1	13.3	484.5	0	0	0	0	0
ENSG00000187942	LDLRAD2	0	0	0	0	0	0	0	0	0	0	0	0	0	0	0	0	0	0	0	0	0	0	0	0	0	0	0	0	23.5	0	0	0.4	0	0	0	0	0	0
ENSG00000142798	HSPG2	96.9	87	114.3	83.3	114.9	104.4	63.8	12	32.3	18.7	7.7	42	636.2	194.7	276.2	331.1	513.9	7.2	101.3	549.3	381	0	32.8	0	3.2	494.8	127.2	290	34.2	79.1	199	28.9	0	0	0	64.4	0	80.5
ENSG00000232037	AL590556.1	0	0	0.7	0.7	1.4	0	0	0	1.3	0.9	0	0	0	0	0	0	0	0	0	3	0	0	0	0	6.4	0	0	0	0	0	0	0.7	0	0	0	0	0	0
ENSG00000283234	AL590556.2	0	0	0	0	0	0	0	0	0	0	0	0	0	0	0	0	0	0	0	0	0	0	0	0	0	0	0	0	0	0	3.2	0	0	0	0	0	0	0
ENSG00000201919	RNU6-1022P	0	0	0	0	0	0	0	0	1.3	0	0	0	0	0	0	0	0	0	0	0	0	0	0	0	0	0	0	0	0	0	0	0	0	0	0	0	0	0
ENSG00000218510	LINC00339	43.4	21.2	10.6	6.7	31.1	0	2.7	3	3.9	16	0	10.2	0	0	1.2	55.8	0	0	0	0	3.1	0	0	0	0	3.8	26.8	0	0	15.1	0	81.9	0	0	0	0	0	0
ENSG00000070831	CDC42	183.6	265.4	203	188.7	232.8	119	78.4	62.8	77.6	66.7	74	57.8	0	105.5	92.1	589	0	215.6	37.5	437	223.6	727.1	54.7	245.1	66	128.4	249.3	1212.8	222.3	58.3	3.2	58.6	107.7	0	0	0	0	80.5
ENSG00000230068	CDC42-IT1	2	0.7	0	0	0	0	0	0	0	0	2.6	0	0	0	0	0	0	0	0	0	0	0	0	0	0	0	0	0	0	0	0	0	0	0	0	0	0	0
ENSG00000271428	AL031281.1	0	0	0	0	0	0	0	0	3.9	0	0	0	0	0	0	0	0	0	0	0	0	0	0	0	0	0	0	0	0	0	0	0	0	0	0	0	0	0
ENSG00000162552	WNT4	0	2.2	0	0	0	0	1.3	0	3.9	0	0	2.3	0	0	0	0	0	0	0	0	0	0	0	0	0	0	0	0	0	0	0	0	0	0	0	0	0	0
ENSG00000184677	ZBTB40	11.5	23.4	19.2	26	17.3	7.3	4	1.5	6.5	11.6	6.4	23.8	0	0	0	3.7	0	3.6	99.1	78.9	0	5	10.9	0	4.8	0	3.5	0	0	7.3	33.4	24.5	0	0	0	0	0	40.3
ENSG00000173372	C1QA	0	8.8	0	0.7	0.7	0	0	0	0	0	0	0	0	4.1	0	0	0	3.6	0	0	0	0	0	0	0	0	0	0	0	9.4	0	0	0	0	0	0	0	0
ENSG00000159189	C1QC	2262.1	2594.1	2769.1	2508.5	2185.9	2209.9	127.5	140.6	76.3	207.3	34.4	167.9	1960.5	1569.8	3814.3	2909	1743.4	2310.3	2361.7	4746.6	3498.7	1817.7	338.9	2298.7	418.3	600.5	2910.1	606.4	657	251.1	3549.3	326.2	215.3	366.9	134.8	708.3	361.4	966.6
ENSG00000173369	C1QB	327.2	389	460.6	412.7	443.8	289.2	12	23.9	5.2	40.9	11.5	20.4	29.5	174.4	285.8	152.5	154.4	488.6	367.9	473.4	1117.9	161.6	10.9	446.7	6.4	3.8	479.5	342.8	90.5	40.9	805.7	83	53.8	0	67.4	64.4	0	161.1
ENSG00000133216	EPHB2	21	28.5	26.3	24	16.6	57	2.7	0	9.1	13.3	6.4	1.1	0	0	0	73.2	33	0	0	0	0	0	0	0	0	0	61.5	0	0	14.1	0	0	0	0	0	0	0	0
ENSG00000004487	KDM1A	38.6	37.3	71	44	49.2	31.4	91.7	110.7	64.6	37.4	74	86.2	15.6	89.2	111.2	11.2	0	237.1	0	112.3	3.1	0	10.9	141.6	107.8	3.8	34.6	84.4	33.5	61.5	0	53.8	0	0	67.4	0	6504.5	886
ENSG00000169641	LUZP1	27.1	60	31.9	40.7	13.7	19.7	21.3	9	18.1	12.5	11.5	32.9	0	0	169.8	0	148.5	0	0	173	107.1	0	10.9	0	0	3.8	34.6	0	0	53.3	0	84.9	0	0	0	0	0	40.3
ENSG00000179546	HTR1D	0	0	0	0	0	0	4	10.5	0	1.8	0	0	0	0	0	0	0	0	0	0	0	0	0	0	0	0	0	0	0	0	0	0	0	0	0	0	0	0
ENSG00000215381	AL109936.1	0	0	0	0	0	0	0	0	0	0	1.3	0	0	0	0	0	0	0	0	0	0	0	0	0	0	0	0	0	0	0	0	0	0	0	0	0	0	0
ENSG00000261326	LINC01355	0	4.4	2.1	0	29.6	5.1	0	1.5	7.8	12.5	14	0	0	4.1	0	0	0	0	0	0	12.6	0	0	0	0	0	0	0	0	5.9	0	36	0	0	0	0	0	0
ENSG00000125944	HNRNPR	227	78.2	167.5	102.7	149.6	164.3	138.2	86.8	112.5	126.3	104.6	119.1	60.7	12.2	505.8	0	16.5	93.4	304	3	0	10.1	109.3	10.9	297.6	71.8	261.4	0	265.8	124	200.6	57.5	53.8	0	0	9336.8	60.2	0
ENSG00000125945	ZNF436	35.2	16.8	6.4	18.7	4.3	35.1	17.3	6	24.6	14.2	8.9	11.3	53.7	4.1	0	42.2	0	179.6	61.7	0	0	0	0	179.8	0	0	0.9	0	0	11.5	0	70.8	0	0	0	64.4	0	0
ENSG00000249087	ZNF436-AS1	0	11.7	0	0	0	0	0	0	5.2	1.8	0	0	0	0	51.4	1.2	46	0	0	0	0	0	0	0	0	0	0	105.5	0	5.2	0	35.2	0	0	0	0	0	0
ENSG00000271420	AL109936.2	0	0	0	0	0	0	6.6	13.5	2.6	0	0	0	0	0	0	0	0	0	0	0	0	0	0	0	0	0	0	0	0	0	0	0	0	0	0	0	0	0
ENSG00000204219	TCEA3	25.1	37.3	21.3	35.3	9.4	43.8	231.1	255.8	193.9	182.4	196.4	163.3	12.1	146	59.8	2.5	0	79	0	0	3.1	0	0	0	186.6	192.6	3.5	363.8	1.4	135.7	41.4	211.7	53.8	61.1	0	0	60.2	0
ENSG00000232482	AL357134.1	0	0	0	0	0	0	1.3	0	1.3	4.4	0	0	0	0	0	0	0	0	0	0	0	0	0	0	0	0	0	0	0	0	0	0	0	0	0	0	0	0
ENSG00000088280	ASAP3	10.2	8.8	36.9	8	8	45.3	18.6	19.4	14.2	29.4	19.1	12.5	0	4.1	0	158.7	0	3.6	61.7	0	0	590.8	10.9	0	0	0	0.9	0	0	56.2	0	58.2	0	0	0	0	0	40.3
ENSG00000007968	E2F2	9.5	0	0	0	0	0	1.3	1.5	7.8	1.8	6.4	0	0	0	0	0	0	0	0	0	0	0	0	0	0	0	0	0	0	6.5	0	10.4	0	0	0	0	0	0
ENSG00000235052	AL021154.1	0	0	0	0	0	0	0	15	0	0	0	6.8	0	0	0	0	0	0	0	0	0	0	0	0	0	0	0	0	0	0	0	0	0	0	0	0	0	0
ENSG00000117318	ID3	2	0	0	4.7	0	0	0	4.5	2.6	0	0	5.7	0	0	0	0	0	0	0	0	0	0	0	0	0	0	0	0	0	1	0	0	0	0	0	0	0	0
ENSG00000142676	RPL11	395.6	306.3	294.5	295.4	349.9	268	217.9	175	183.6	248.2	235.9	207.5	351.9	93.3	837	415.4	261.7	280.3	625.7	206.4	311.8	313.1	437.3	501.1	279.9	230.4	270.1	548.4	142.5	221.1	197.4	196.5	3122.1	61.1	0	0	0	120.8
ENSG00000011007	ELOA	19	61.4	18.5	56	7.2	28.5	43.8	7.5	46.5	27.6	38.3	26.1	0	64.9	0	79.4	198	165.3	0	0	0	0	0	0	0	11.3	26.8	0	131.1	8.6	0	160.2	53.8	0	0	0	0	0
ENSG00000236810	ELOA-AS1	0	12.4	7.1	6	7.2	0	0	0	2.6	8.9	0	7.9	0	0	0	0	0	0	0	0	0	0	0	0	0	0	0	0	0	23.3	0	0	0	0	0	0	0	0
ENSG00000057757	PITHD1	33.2	97.2	72.4	45.3	39.8	40.9	23.9	32.9	15.5	22.2	34.4	22.7	0	8.1	40.7	518.3	0	0	0	0	340.1	0	54.7	0	29	0	39.8	0	25.7	42.8	1.6	19.6	0	0	0	0	0	1248.5
ENSG00000011009	LYPLA2	9.5	20.5	11.4	12	23.9	0	35.9	13.5	23.3	25.8	80.3	40.8	1.7	12.2	50.2	50.8	62.5	10.8	0	0	157.5	0	0	0	70.8	0	3.5	0	0	64.6	0	15.2	0	0	0	0	60.2	0
ENSG00000117308	GALE	6.8	13.2	35.5	21.3	16.6	35.1	49.2	9	31	24.9	61.2	21.5	0	8.1	0	1.2	0	0	0	3	0	5	0	0	107.8	0	0.9	0	0	34.8	0	1.9	0	0	0	0	0	0
ENSG00000117305	HMGCL	0	11	28.4	6	31.8	7.3	13.3	19.4	6.5	7.1	2.6	3.4	0	0	0	50.8	1.2	0	0	0	0	0	0	5.4	29	0	90.9	0	0.7	6.5	87.6	0.4	0	0	0	0	0	40.3
ENSG00000179163	FUCA1	357	397.7	389.6	448.1	169.9	394.4	73.1	64.3	42.7	45.4	47.2	49.9	130	4.1	81.3	250.5	152.1	251.5	0	18.2	437.7	545.3	10.9	5.4	22.5	0	333.3	5.3	0.7	66.9	65.3	41.2	0	0	0	0	60.2	80.5
ENSG00000188822	CNR2	0	0	0	0	0	0	0	0	1.3	0	0	0	0	0	0	0	0	0	0	0	0	0	0	0	0	0	0	0	0	0	0	0	0	0	0	0	0	0
ENSG00000229106	BTBD6P1	0	0	0	0	0	0	0	0	1.3	0	0	0	0	0	0	0	0	0	0	0	0	0	0	0	0	0	0	0	0	0	0	0	0	0	0	0	0	0
ENSG00000230228	AL590609.2	10.8	13.9	8.5	11.3	24.6	6.6	31.9	10.5	59.5	26.7	34.4	27.2	1.7	0	15.5	0	4.7	0	35.2	6.1	0	0	0	0	22.5	7.6	0	5.3	14.3	61.3	8	33	0	0	0	0	0	0
ENSG00000189266	PNRC2	135.5	65.8	61.7	96.7	47.7	23.4	38.5	46.4	53	96.1	37	85.1	0	129.8	112.4	0	99	57.5	0	0	75.6	0	0	147.1	43.4	0	98.7	0	56.3	61.5	9.6	38.2	0	0	0	0	0	40.3
ENSG00000188529	SRSF10	104.3	152.1	119.9	151.4	94	137.3	90.3	89.7	104.7	149.5	112.2	123.6	5.2	8.1	0	264.1	150.9	186.8	2.2	3	837.7	0	0	98	325	18.9	51.9	52.7	82.7	112.9	275.5	119.4	0	0	67.4	0	60.2	40.3
ENSG00000215905	AL590609.1	1.4	2.9	1.4	0	1.4	2.9	4	0	3.9	4.4	2.6	0	0	0	0	1.2	1.2	0	0	3	9.4	0	0	0	0	3.8	8.7	0	0	1	4.8	0	0	0	0	0	0	0
ENSG00000142661	MYOM3	0	0	0	0	0	0	5.3	15	5.2	0	2.6	0	0	0	0	0	0	0	0	0	0	0	0	0	0	0	0	0	0	0	0	0	0	0	0	0	0	0
ENSG00000142677	IL22RA1	0	0	0	0	0	0	0	0	1.3	5.3	0	0	0	0	0	0	0	0	0	0	0	0	0	0	0	0	0	0	0	0	0	0	0	0	0	0	0	0
ENSG00000185436	IFNLR1	0	6.6	15.6	12	3.6	4.4	6.6	0	1.3	3.6	1.3	0	0	0	0	0	0	0	0	0	0	0	0	0	0	0	0	0	0	0	0	0	0	0	0	0	0	0
ENSG00000158055	GRHL3	0	0	0	0	0	0	2.7	3	0	4.4	7.7	0	0	0	0	0	0	0	0	0	0	0	0	0	0	0	0	0	0	0.6	0	0	0	0	0	0	0	0
ENSG00000001460	STPG1	4.7	2.9	6.4	7.3	0.7	0.7	4	7.5	9.1	1.8	5.1	7.9	0	16.2	0	0	9.4	0	0	206.4	0	0	0	0	0	0	0	73.8	0	0.2	0	0.7	0	61.1	0	0	0	0
ENSG00000001461	NIPAL3	0	6.6	20.6	9.3	0	23.4	14.6	12	24.6	16	25.5	12.5	98.8	0	0	0	47.2	0	0	464.3	0	0	32.8	0	0	0	0.9	0	158.9	26.2	23.9	65.6	0	0	67.4	0	0	0
ENSG00000117602	RCAN3	33.9	25.6	53.2	24.7	5.8	9.5	1.3	35.9	29.7	9.8	12.8	17	3.5	12.2	0	0	0	0	0	0	0	0	0	0	1.6	0	32.9	258.4	24.9	55.2	172	31.9	0	0	0	0	0	0
ENSG00000184454	NCMAP	0	0	0	0	0	0.7	0	0	0	0	0	0	0	0	0	0	0	0	0	0	0	0	0	0	0	0	0	0	0	0	1.6	0	53.8	0	0	0	0	0
ENSG00000133226	SRRM1	6.1	39.5	29.8	26	64.3	30.7	23.9	34.4	27.2	19.6	26.8	27.2	0	12.2	19.1	14.9	0	0	0	0	0	0	0	92.6	19.3	0	27.7	0	12.8	39.2	46.2	15.9	0	0	0	0	0	40.3
ENSG00000169504	CLIC4	86	113.3	98.6	77.3	41.9	133.6	90.3	92.7	87.9	78.3	71.4	73.7	71.1	77.1	227.2	338.5	400.8	0	81.5	0	0	0	32.8	0	90.1	211.5	142.8	0	0	108.7	97.1	88.6	0	0	67.4	64.4	0	80.5
ENSG00000020633	RUNX3	34.6	70.2	40.5	41.3	83.8	16.1	18.6	0	6.5	23.1	20.4	37.4	0	4.1	50.2	0	0	269.5	0	610	69.3	0	10.9	179.8	0	11.3	13	179.3	134.7	10.9	293	3	0	61.1	0	0	60.2	0
ENSG00000233419	AL121994.1	0	0.7	0.7	0	0	0	0	0	0	0	0	0	0	0	0	6.2	0	0	4.4	0	0	0	0	0	38.6	0	0	0	0	2.7	0	0	0	0	0	0	240.9	0
ENSG00000117614	SYF2	31.2	105.3	59.6	89.4	28.2	92	123.5	70.3	94.4	56.9	85.4	81.7	0	8.1	388.6	135.2	424.4	262.3	108	0	888.1	5	10.9	0	46.7	7.6	66.7	184.6	30.6	38	0	225	0	61.1	0	128.8	0	0
ENSG00000284602	AL031432.4	10.2	0	0	2.7	0	0	0	0	0	0	0	0	0	0	0	0	0	0	0	0	0	0	0	0	0	0	0	0	0	0	0	0	0	0	0	0	0	0
ENSG00000117616	RSRP1	92.8	92.1	110	117.4	106.3	117.6	34.5	16.5	44	68.5	44.6	45.4	0	16.2	87.3	96.7	152.1	0	30.8	0	0	964.4	0	0	1.6	7.6	40.7	0	171	40.1	318.5	101.2	0	0	0	0	0	40.3
ENSG00000272432	AL031432.3	0	1.5	0	0	0	18.3	0	0	0	2.7	1.3	0	1.7	0	0	0	0	0	0	0	0	0	0	0	0	0	0	0	0	0	0	5.2	0	0	0	0	0	0
ENSG00000261349	AL031432.2	0	0	0	0	0	0	1.3	0	0	0	0	0	0	0	0	0	0	0	0	0	0	0	0	0	0	0	0	0	0	0	0	0	0	0	0	0	0	0
ENSG00000187010	RHD	0	0	0	0	0	0	0	0	0	0.9	0	0	0	0	0	0	0	0	0	0	0	0	0	0	0	0	0	0	0	0	0	0	0	0	0	0	0	0
ENSG00000183726	TMEM50A	133.5	118.4	181	84.7	106.3	226.4	154.1	148.1	138.3	149.5	123.7	129.3	145.6	421.9	416.1	223.2	788.6	0	2.2	603.9	185.8	0	21.9	0	0	0	180	0	40.6	133.4	173.6	51.9	0	61.1	0	64.4	0	40.3
ENSG00000204178	TMEM57	29.8	43.1	72.4	49.3	40.5	66.5	98.3	64.3	76.3	95.2	80.3	53.3	147.3	4.1	127.9	17.4	0	0	152	0	122.8	0	10.9	0	57.9	3.8	33.8	0	0	81.6	0	40.8	0	61.1	0	193.2	0	40.3
ENSG00000157978	LDLRAP1	13.5	23.4	20.6	29.3	21	16.1	23.9	35.9	45.3	9.8	24.2	5.7	0	8.1	3.6	0	0	0	0	0	0	0	0	0	0	0	21.6	0	0	5.9	25.5	41.5	0	0	0	0	0	40.3
ENSG00000225643	AL606491.1	0	0	0	0	0	0	0	6	1.3	0	0	0	0	0	0	0	0	0	0	0	0	0	0	0	0	0	0	0	0	0	0	0	0	0	0	0	0	0
ENSG00000117643	MAN1C1	46.1	43.1	15.6	22.7	13	82.5	35.9	28.4	19.4	19.6	23	26.1	1.7	0	0	34.7	0	0	77.1	449.2	47.2	0	21.9	0	4.8	3.8	70.1	0	0	16.6	312.1	14.1	0	0	0	0	0	0
ENSG00000233478	AL031280.1	5.4	7.3	2.8	0	0.7	0	1.3	6	0	0.9	2.6	3.4	0	4.1	0	0	0	0	0	0	0	0	0	0	0	0	0	0	0	0	9.6	23.4	0	0	0	0	0	0
ENSG00000162430	SELENON	60.3	54.1	73.1	45.3	54.9	28.5	55.8	44.9	47.8	25.8	24.2	32.9	0	20.3	57.4	0	77.8	32.3	160.8	88	6.3	277.7	43.7	234.2	3.2	173.7	7.8	10.5	32.8	49.7	1.6	53	0	0	0	0	0	0
ENSG00000228172	AL020996.1	9.5	0	0	3.3	0	0	0	3	0	2.7	3.8	2.3	0	0	0	0	0	0	0	0	0	0	0	0	37	0	0	0	0	8.6	0	0	0	0	0	0	0	0
ENSG00000117640	MTFR1L	0	15.4	7.1	18	3.6	0	12	7.5	3.9	7.1	12.8	18.1	0	0	171	0	0	0	0	0	0	0	0	0	0	0	0	0	0	11.1	0	0	0	0	0	0	0	0
ENSG00000127423	AUNIP	0	0	0	4	0	0	0	0	2.6	1.8	1.3	0	0	0	0	0	0	0	0	0	0	0	0	0	0	0	45.9	0	0	17.8	0	0	0	61.1	0	0	0	0
ENSG00000182749	PAQR7	10.2	49.7	6.4	16.7	7.2	9.5	42.5	25.4	47.8	26.7	42.1	39.7	0	8.1	35.9	0	0	0	74.9	0	0	0	0	0	0	0	0	0	33.5	45.7	0	15.9	0	0	0	0	0	40.3
ENSG00000207302	Y_RNA	0	0	0	0	0	0	0	0	0	0	0	0	0	0	0	0	0	0	0	0	0	0	0	0	0	0	0	0	0	0	0	10.4	0	0	0	0	0	0
ENSG00000117632	STMN1	220.2	179.9	196.6	222	127.2	259.3	193.9	125.6	174.5	108.5	170.9	125.9	3.5	12.2	0	184.8	0	0	108	157.8	1184.1	5	0	0	135.1	41.5	130.7	121.3	39.2	150	108.3	174.6	53.8	61.1	0	0	0	80.5
ENSG00000229786	SNRPFP2	1.4	0	1.4	2	2.9	0.7	2.7	0	0	1.8	2.6	5.7	0	0	1.2	0	0	7.2	0	3	0	0	0	0	12.9	0	3.5	0	0.7	0.6	0	0.4	0	0	0	0	120.5	0
ENSG00000223624	AL033528.1	0.7	0.7	0	0	0	0	0	0	1.3	0	0	2.3	0	0	0	0	0	0	0	0	0	0	0	0	0	0	0	0	0	0.6	0	0	0	0	0	0	0	0
ENSG00000158006	PAFAH2	0	3.7	2.1	6.7	6.5	0	0	6	5.2	2.7	1.3	3.4	0	0	0	0	0	0	0	0	0	0	0	0	0	0	13	0	0	0	92.4	0	0	0	0	0	0	0
ENSG00000158008	EXTL1	0	1.5	0	5.3	0	0	0	1.5	1.3	0	0	0	0	0	0	0	0	0	0	0	0	0	0	0	0	0	0	0	0	9.9	0	0	0	0	0	0	0	0
ENSG00000158014	SLC30A2	0	0	0	0	0	0	6.6	4.5	2.6	0	7.7	2.3	0	0	0	0	0	0	0	0	0	0	0	0	0	0	0	0	0	14.5	0	0	0	0	0	0	0	0
ENSG00000284309	AL391650.2	0	0	0	0	0	0	0	0	0	0	2.6	0	0	0	0	0	0	0	0	0	0	0	0	0	0	0	0	0	0	0	0	0	0	0	0	0	0	0
ENSG00000158022	TRIM63	10.8	0	0	0	0	0	0	0	0	0	0	0	0	0	0	0	0	0	0	0	0	0	0	0	0	0	0	0	0	0	0	0	0	0	0	0	0	0
ENSG00000175087	PDIK1L	13.5	19	13.5	12	5.1	15.3	81	35.9	49.1	58.7	51	45.4	10.4	8.1	0	0	0	0	0	0	0	0	0	103.5	0	102	11.3	0	1.4	31.9	0	15.6	0	0	0	0	0	0
ENSG00000197245	FAM110D	0	0.7	0	8.7	14.5	11	8	0	0	0	8.9	0	0	283.9	0	0	0	0	394.4	0	0	0	0	0	0	0	0.9	0	17.1	6.7	0	36.3	0	0	0	0	0	0
ENSG00000142684	ZNF593	0.7	2.2	0	0	4.3	0	2.7	7.5	0	1.8	7.7	2.3	0	0	0	0	1.2	0	0	0	0	0	0	0	51.5	0	1.7	0	0	7.8	0	0.7	0	0	0	0	0	80.5
ENSG00000142675	CNKSR1	0	0	0	2	0	0	1.3	0	1.3	0	0	0	0	0	0	0	0	0	0	0	0	0	0	0	0	0	0	0	0	8.4	0	0	0	0	0	0	0	0
ENSG00000188782	CATSPER4	0	0	0	0	0	0	0	0	1.3	0	0	0	0	0	0	0	0	0	0	0	0	0	0	0	0	0	0	0	0	0	0	0	0	0	0	0	0	0
ENSG00000278572	AL355877.3	0	0	0	0	0	0	0	0	3.9	0	0	0	0	0	0	0	0	0	0	0	0	0	0	0	0	0	0	0	0	0	0	0	0	0	0	0	0	0
ENSG00000130695	CEP85	0	4.4	15.6	8.7	0	0	4	6	7.8	16.9	14	14.7	0	0	0	0	0	0	0	0	0	0	0	0	0	0	0	0	0	0.2	0	0	0	0	0	0	0	0
ENSG00000142669	SH3BGRL3	807.5	1155.2	721.7	752.1	826.2	726.6	241.8	158.5	208.2	208.2	232.1	211	74.5	93.3	289.4	510.9	324.2	560.5	101.3	285.3	450.3	15.1	459.2	130.7	101.4	120.9	992.8	0	213.8	202.2	250	321.8	0	122.3	67.4	0	60.2	201.4
ENSG00000158062	UBXN11	0	0	0.7	0	0	0	0	0	1.3	0	0	0	0	0	0	0	0	0	0	0	0	0	0	0	0	0	0	0	0	0	86	0	0	0	0	0	0	0
ENSG00000169442	CD52	203.2	229.6	211.5	120	191.6	130.7	4	20.9	2.6	22.2	3.8	5.7	50.3	0	0	7.4	106.1	0	0	0	3.1	10.1	0	403.1	136.8	0	273.5	5.3	2.1	0.6	226.1	2.6	0	0	67.4	0	60.2	80.5
ENSG00000176092	CRYBG2	0	0	0	0	0	0	0	0	1.3	0	0	0	0	0	0	0	0	0	0	0	0	0	0	0	0	0	0	0	0	0	0	0	0	0	0	0	0	0
ENSG00000225854	AL451139.1	7.5	9.5	6.4	14.7	5.1	11.7	5.3	12	20.7	11.6	15.3	6.8	1.7	16.2	9.6	3.7	47.2	0	63.9	39.5	0	15.1	0	0	49.9	0	13	5.3	5	7.6	8	12.6	0	0	0	64.4	0	0
ENSG00000131914	LIN28A	0	1.5	7.1	4	16.6	0.7	138.2	248.3	285.7	118.3	202.8	188.3	3.5	8.1	0	0	0	0	0	6.1	3.1	5	513.8	294.1	148	324.8	0	15.8	76.2	76.8	0	33	0	61.1	67.4	0	0	0
ENSG00000117682	DHDDS	13.5	15.4	7.1	10	34.7	23.4	6.6	12	16.8	24	8.9	18.1	0	0	0	37.2	0	395.2	6.6	0	3.1	5	0	5.4	0	0	0	0	0	0	1.6	0.4	0	0	0	0	0	0
ENSG00000223583	AL513365.1	5.4	22.7	12.1	4	12.3	14.6	5.3	13.5	2.6	2.7	11.5	7.9	0	4.1	4.8	22.3	8.3	0	2.2	3	0	0	0	0	4.8	0	16.4	0	10.7	5.7	6.4	2.6	0	0	0	0	0	120.8
ENSG00000225891	AL513365.2	0	0	0	0	0	0	0	0	0	0.9	0	0	0	0	0	0	0	0	0	0	0	0	0	0	0	0	0	0	0	0	0	0	0	0	0	0	0	0
ENSG00000198830	HMGN2	0.7	1.5	0.7	0	0	0	0	1.5	0	1.8	2.6	0	0	0	0	0	0	0	0	9.1	0	0	0	0	0	0	0	0	0.7	0.8	0	1.1	0	0	0	64.4	0	0
ENSG00000117676	RPS6KA1	97.6	84.1	54.6	43.3	56.4	189.1	25.2	12	49.1	22.2	20.4	30.6	76.3	0	0	59.5	0	0	0	0	0	5	0	0	131.9	0	157.5	0	32.1	19.9	28.7	0.4	0	0	0	64.4	0	40.3
ENSG00000238705	MIR1976	6.1	0	0	0	0	0	0	0	0	0	0	0	0	0	0	0	0	0	0	0	0	0	0	0	0	0	0	0	0	0	0	0	0	0	0	0	0	0
ENSG00000243905	RN7SL679P	0	0	0	0.7	0	9.5	0	1.5	0	0.9	1.3	0	0	0	0	0	0	0	0	0	0	0	0	0	0	0	0	0	0	0	0	0	0	0	0	0	0	0
ENSG00000229247	AL627313.1	0.7	0	0	0	0	0	0	0	1.3	0	1.3	0	0	0	0	0	0	0	0	0	0	0	0	0	0	0	0	0	0	0.4	0	0	0	0	0	0	0	0
ENSG00000238316	snoU13	0.7	0	0	0.7	1.4	0	1.3	0	0	0.9	0	0	0	0	0	0	0	0	0	0	0	0	0	0	72.4	0	0	0	0	0	1.6	0	0	0	0	0	0	0
ENSG00000235069	AL627082.1	1.4	1.5	27.7	22.7	0.7	13.1	35.9	70.3	23.3	16	8.9	5.7	0	0	0	0	0	0	0	0	0	0	0	0	56.3	0	88.3	5.3	0	18	0	20.8	0	0	0	0	0	40.3
ENSG00000260063	AL512408.1	0	0	0.7	2.7	7.2	0	0	0	0	4.4	0	1.1	0	0	0	0	0	0	0	0	0	0	0	0	0	0	0	0	0	1.5	0	0	0	0	0	0	0	0
ENSG00000117713	ARID1A	201.2	272.7	191.6	184	156.9	186.2	219.2	233.3	245.7	196.6	337.9	273.3	67.6	16.2	257.1	171.1	339.5	618	260	173	103.9	0	10.9	245.1	489.1	45.3	554	0	221.6	184.8	84.4	145	0	183.4	0	128.8	0	362.5
ENSG00000060642	PIGV	13.5	24.9	0.7	0	21	48.9	9.3	19.4	2.6	12.5	2.6	3.4	0	0	148.3	0	0	0	0	0	0	0	0	0	0	0	0	0	52.7	0	0	0	0	61.1	0	0	0	0
ENSG00000241188	RN7SL165P	2	0	0	0	0	0	0	0	0	0	0	0	0	0	0	0	0	0	0	0	0	0	0	0	0	0	0	0	0	0	0	0	0	0	0	0	0	0
ENSG00000204160	ZDHHC18	59.6	35.8	56.8	22.7	49.2	64.3	46.5	32.9	33.6	16.9	12.8	20.4	31.2	4.1	32.3	0	0	0	0	112.3	0	0	32.8	5.4	91.7	192.6	15.6	5.3	22.1	33.6	170.4	0.4	0	0	0	64.4	0	0
ENSG00000175793	SFN	0	0.7	0	0.7	0	0.7	146.1	77.8	115.1	81.9	213	120.2	1.7	12.2	0	0	0	0	0	0	0	0	0	5.4	32.2	0	0	0	39.9	187.7	0	155.3	0	2690.5	0	4121.1	0	0
ENSG00000142751	GPN2	4.7	20.5	27	22.7	24.6	29.9	61.1	46.4	54.3	40	61.2	94.1	0	4.1	0	0	37.7	0	218.1	0	0	0	0	174.3	14.5	3.8	0	0	162.5	53.7	0	51.9	0	0	0	0	0	0
ENSG00000198746	GPATCH3	16.3	31.4	16.3	6	15.9	21.2	23.9	20.9	31	9.8	19.1	10.2	93.6	0	0	0	0	0	0	0	0	0	0	0	0	3.8	38.1	200.4	0	15.3	0	37.8	0	0	0	128.8	0	0
ENSG00000090273	NUDC	34.6	76	48.3	30.7	46.3	51.1	83.7	109.2	80.2	98.8	63.8	66.9	0	12.2	95.7	99.2	61.3	0	297.4	0	0	0	0	0	0	3.8	46.7	184.6	180.3	157.1	0	20.4	0	0	0	0	0	80.5
ENSG00000175707	KDF1	4.7	0	0	0	0	0.7	23.9	10.5	34.9	31.1	11.5	42	1.7	4.1	0	0	0	0	0	0	3.1	0	0	0	230.1	0	0	0	0	54.5	0	34.8	0	61.1	0	0	0	0
ENSG00000172746	RPL12P13	15.6	20.5	11.4	16	8	6.6	10.6	9	6.5	10.7	16.6	9.1	79.7	0	0	36	0	3.6	0	69.8	0	0	0	0	1.6	0	70.1	42.2	0	0	0	21.1	0	0	0	0	0	0
ENSG00000224064	AL356390.1	0	0.7	0	0	0.7	0.7	0	0	0	0.9	0	0	0	0	3.6	0	0	14.4	0	0	3.1	0	0	0	1.6	0	3.5	0	0	1.9	1.6	0	0	0	0	0	0	0
ENSG00000225294	OSTCP2	0	0	2.1	2	0	0	0	0	0	2.7	7.7	0	0	0	0	0	0	0	0	0	0	0	0	0	0	0	0	0	0	0	0	0	0	0	0	0	0	0
ENSG00000253368	TRNP1	0	0.7	0.7	0	0	7.3	12	19.4	22	13.3	14	20.4	1.7	0	0	107.9	0	0	0	0	0	0	10.9	0	0	0	0	0	0	19.3	0	0	0	0	0	0	0	0
ENSG00000158246	FAM46B	0	0	0	0	0	0	22.6	10.5	1.3	10.7	2.6	2.3	0	0	0	0	0	0	0	0	0	0	0	0	0	0	0	0	0	6.3	0	0	0	0	0	0	0	4510.7
ENSG00000090020	SLC9A1	14.2	19	27.7	36.7	55.7	21.9	38.5	49.4	37.5	36.5	26.8	42	1.7	215	0	1.2	0	0	0	0	0	0	0	0	53.1	287	0	0	151.1	77.4	8	73.4	0	0	0	0	60.2	0
ENSG00000229985	AL590640.2	3.4	0	0.7	0	0.7	1.5	0	0	1.3	0.9	0	2.3	5.2	0	0	0	0	0	0	0	0	0	0	0	0	0	0	0	0	1.3	0	0	0	917.2	0	0	0	0
ENSG00000214973	CHCHD3P3	0	0	0	0	0	0	0	0	0	0	3.8	0	0	0	0	0	0	0	0	0	0	0	0	0	0	0	0	0	0	0	0	0	0	0	0	0	0	0
ENSG00000225159	NPM1P39	0.7	0	0.7	0.7	0	0	0	1.5	0	0.9	1.3	0	0	0	0	0	0	3.6	0	0	0	0	0	0	0	0	0	0	0	0	0	0	0	0	0	0	0	0
ENSG00000225990	SNRPEP7	0	0	0	0	0	0	0	0	0	0	0	0	0	0	0	0	0	0	0	0	0	0	0	0	0	0	0	0	0	0	1.6	0	0	0	0	0	0	0
ENSG00000142784	WDTC1	27.8	15.4	49	8	18.1	8.8	15.9	6	14.2	21.4	16.6	12.5	1.7	8.1	1.2	2.5	34.2	0	0	0	3.1	0	579.4	0	197.9	3.8	11.3	0	0	57.7	0	100.5	0	122.3	0	0	0	0
ENSG00000186501	TMEM222	6.1	13.2	9.2	4.7	17.3	11.7	8	10.5	10.3	6.2	11.5	14.7	1.7	4.1	4.8	1.2	1.2	3.6	39.7	3	18.9	0	10.9	32.7	4.8	0	0	0	0	11.5	0	4.4	0	0	0	0	0	0
ENSG00000142765	SYTL1	13.5	7.3	7.8	11.3	8	4.4	8	7.5	0	5.3	0	4.5	1.7	0	0	0	0	0	0	0	113.4	0	0	0	3.2	162.4	0	0	0.7	13.8	22.3	36	0	0	0	0	0	0
ENSG00000142733	MAP3K6	0	7.3	19.2	8.7	28.9	0	9.3	0	5.2	5.3	7.7	4.5	0	0	0	0	17.7	0	0	0	0	0	0	0	0	0	26.8	0	0	1.5	0	0.4	0	0	0	0	0	0
ENSG00000142748	FCN3	0	0	1.4	0	0	0	4	0	0	0	0	0	0	0	0	0	0	0	0	0	0	0	0	0	0	0	31.2	0	0	0	0	0	0	0	0	0	0	0
ENSG00000174950	CD164L2	0	0	0	0	0	0	1.3	1.5	0	0.9	3.8	0	0	0	0	0	0	0	0	0	0	0	0	0	0	0	0	0	0	0	0	0	0	0	0	0	0	0
ENSG00000181773	GPR3	0	0	2.1	0	0	0	0	0	0	0	0	0	0	0	0	0	0	0	37.5	0	0	5	0	0	0	0	0	0	0	0	0	0	0	0	0	0	0	0
ENSG00000158195	WASF2	37.9	33.6	28.4	40	34.7	19	17.3	15	38.8	25.8	23	20.4	0	12.2	113.6	2.5	0	14.4	48.5	0	0	0	0	0	180.2	0	24.2	0	0.7	14.3	3.2	82.7	0	0	0	0	0	80.5
ENSG00000126705	AHDC1	21.7	48.3	77.4	40	91.8	52.6	74.4	62.8	87.9	48	58.7	37.4	0	8.1	228.4	96.7	0	204.8	564	3	0	10.1	10.9	0	48.3	0	13.8	0	138.9	73.8	0	12.6	0	0	0	0	0	40.3
ENSG00000000938	FGR	133.5	185	140.5	166.7	146	199.4	9.3	12	1.3	1.8	2.6	9.1	1.7	0	163.8	0	112	0	0	60.7	239.3	0	0	10.9	1.6	3.8	328.1	0	9.3	0.4	82.8	0	0	61.1	0	0	0	120.8
ENSG00000235912	AL031729.1	2.7	14.6	5	13.3	4.3	9.5	6.6	0	2.6	0.9	5.1	4.5	5.2	0	0	3.7	0	0	143.2	0	0	0	0	0	0	0	0	0	0.7	1.9	0	24.1	0	0	0	0	240.9	0
ENSG00000233975	LINC02574	0	0	0	0	0	0	1.3	0	0	0	0	0	0	0	0	0	0	0	0	0	0	0	0	0	0	0	0	0	0	0	0	0	0	0	0	0	0	0
ENSG00000126709	IFI6	279.1	397	310.8	263.4	310.1	249	731.9	568.4	603.8	827.4	401.7	502.4	1.7	36.5	348	313.7	117.9	3.6	297.4	385.4	141.7	0	874.6	239.7	288	34	11.3	664.4	96.2	332.5	172	279.2	53.8	0	0	0	0	80.5
ENSG00000206767	RNU6-949P	0	0	0	0.7	0	0	0	0	0	0	0	0	0	0	0	0	0	0	0	0	0	0	0	0	0	0	0	0	0	0	0	0	0	0	0	0	0	0
ENSG00000226662	CHMP1AP1	0	0	0	0	0	0	0	0	0	0	0	0	0	0	4.8	0	0	0	0	0	0	0	0	0	0	0	0	0	0	0	0	0	0	0	0	0	0	0
ENSG00000207095	RNU6-424P	0	0	0	0	0	0	0	0	0	0	0	0	0	0	0	1.2	0	0	0	0	0	0	0	0	0	0	0	0	0	0	0	0	0	0	0	0	0	0
ENSG00000009780	FAM76A	73.8	42.4	27.7	48	15.2	44.5	41.2	34.4	24.6	55.2	33.2	28.4	0	0	0	48.4	161.5	0	30.8	0	0	0	0	5.4	57.9	0	3.5	0	0	36.5	30.3	31.1	0	0	0	0	0	40.3
ENSG00000231344	AL020997.1	13.5	3.7	1.4	0	2.2	0	2.7	0	10.3	3.6	3.8	0	0	0	0	0	0	0	0	0	0	0	0	0	0	0	0	0	0	0.2	0	0.7	0	0	0	0	0	0
ENSG00000117758	STX12	36.6	49.7	39.7	38	47.7	81.1	29.2	13.5	36.2	22.2	37	43.1	1.7	0	46.6	73.2	369	0	0	0	148	0	0	0	51.5	3.8	66.7	36.9	24.2	24.3	78	67.8	0	0	0	0	0	80.5
ENSG00000269971	AL020997.2	2.7	0	0	1.3	0	0	0	0	0	0	0	0	0	0	0	0	0	0	0	0	0	0	0	0	0	0	0	0	0	0	0	0	0	0	0	0	0	0
ENSG00000270031	AL020997.3	0	0	0	0	0	0	4	0	0	0	0	0	0	0	1.2	0	0	0	0	0	0	0	0	0	0	0	0	0	0	0	0	0	0	0	0	0	0	0
ENSG00000117751	PPP1R8	52.2	30.7	56.8	28	19.5	6.6	47.8	15	38.8	13.3	29.3	28.4	0	4.1	0	0	0	0	268.8	0	0	0	0	0	0	0	0	0	0.7	24.1	0	50.8	0	0	0	0	0	0
ENSG00000130775	THEMIS2	70.5	161.6	165.4	131.4	169.9	93.5	18.6	7.5	25.9	24.9	42.1	25	0	0	2.4	94.2	0	0	0	248.9	0	90.9	0	0	289.6	7.6	241.5	0	161	5	74.8	77.5	107.7	0	0	0	120.5	40.3
ENSG00000117748	RPA2	30.5	43.9	54.6	42.7	57.8	50.4	35.9	25.4	40.1	33.8	29.3	68	1.7	20.3	0	39.7	0	0	96.9	0	3.1	0	0	5.4	3.2	0	91.8	0	198.1	52.9	0	50.8	53.8	0	0	0	0	40.3
ENSG00000130768	SMPDL3B	3.4	0	1.4	0	0	28.5	12	13.5	24.6	14.2	3.8	4.5	0	0	0	0	0	0	0	0	0	0	0	0	0	0	0	0	51.3	0	0	14.5	0	0	0	0	0	0
ENSG00000158156	XKR8	46.7	43.1	22.7	16.7	15.2	27.8	15.9	9	23.3	10.7	31.9	26.1	0	109.5	0	0	0	0	2.2	0	0	0	0	65.4	49.9	0	24.2	0	0	6.5	0	0	0	0	0	0	0	0
ENSG00000158161	EYA3	8.1	15.4	23.4	17.3	13.7	17.5	19.9	29.9	29.7	28.5	17.9	18.1	0	4.1	0	0	51.9	3.6	35.2	798.2	0	287.8	21.9	0	0	203.9	46.7	5.3	15.7	14.3	57.3	51.2	0	0	0	0	0	40.3
ENSG00000240750	RN7SL559P	0	0	6.4	0	8	0	12	7.5	1.3	0	1.3	2.3	0	0	0	0	0	0	0	0	0	0	0	0	0	30.2	0	0	0	0	0	0	0	0	0	0	0	0
ENSG00000228589	SPCS2P4	6.8	5.1	7.1	4	0	0	8	6	5.2	11.6	8.9	9.1	0	0	0	0	0	0	0	0	0	0	0	0	0	0	53.7	0	27.8	8.6	0	1.9	0	0	0	0	0	40.3
ENSG00000214812	AL137792.1	0	0	0	0	0	0	0	0	2.6	0	0	0	0	0	0	0	0	0	0	0	107.1	0	0	0	0	0	0	0	0	0	0	0	0	0	0	0	0	0
ENSG00000253005	RNU6-176P	0	0	0	0	0	0	0	0	0	0	0	0	0	0	0	0	0	0	0	0	0	0	0	0	0	0	0	0	0	0	0	3.7	0	0	0	0	0	0
ENSG00000169403	PTAFR	52.8	66.5	30.5	47.3	49.9	6.6	10.6	3	24.6	14.2	7.7	9.1	272.1	4.1	0	0	350.1	0	0	479.5	3.1	0	317.1	0	0	3.8	49.3	0	0.7	33.1	0	0.4	0	0	0	0	0	0
ENSG00000126698	DNAJC8	29.8	35.1	39.7	62.7	49.2	73.8	29.2	10.5	14.2	32	37	26.1	3.5	101.4	21.5	0	142.6	0	15.4	0	0	0	0	0	0	3.8	52.8	0	29.2	30.2	164	22.6	107.7	61.1	0	0	0	40.3
ENSG00000130770	ATPIF1	71.8	77.5	90.1	127.4	131.6	146.8	146.1	167.5	213.3	156.6	173.4	127	211.5	24.3	31.1	106.6	294.7	0	2.2	3	6.3	0	0	0	43.4	264.4	46.7	432.4	59.9	175.2	0	229.1	53.8	0	0	64.4	0	80.5
ENSG00000270605	AL353622.1	9.5	0.7	0	0	0	0	2.7	0	0	0	1.3	0	0	0	0	0	0	0	0	0	0	0	0	0	0	0	0	0	0	0.2	0	0	0	0	0	0	0	0
ENSG00000130766	SESN2	6.1	1.5	1.4	12.7	4.3	0	6.6	10.5	0	9.8	12.8	0	1.7	0	0	0	1.2	0	0	0	0	0	0	0	0	0	31.2	5.3	0	2.9	0	0	0	0	0	0	0	0
ENSG00000130772	MED18	4.1	1.5	15.6	3.3	4.3	0	26.6	10.5	3.9	0	8.9	19.3	0	4.1	0	42.2	88.4	0	0	0	0	0	0	0	0	0	0	0	0	17.4	0	0	0	0	0	64.4	0	0
ENSG00000204138	PHACTR4	49.5	16.8	66.7	89.4	42.6	89.1	34.5	35.9	37.5	73.8	25.5	44.2	206.3	8.1	70.5	109.1	133.2	0	103.5	3	0	0	10.9	0	11.3	234.2	237.2	0	65.6	40.1	0	24.5	0	0	0	64.4	0	0
ENSG00000229820	CR391992.1	22.4	7.3	0	1.3	8	0	4	0	0	3.6	0	0	0	0	0	0	0	0	0	0	0	0	0	0	0	0	0	0	0	2.3	0	0	0	0	0	0	0	0
ENSG00000180198	RCC1	1.4	4.4	5	6	8.7	0.7	41.2	25.4	51.7	24.9	54.8	37.4	0	0	0	0	0	0	0	0	0	0	0	0	0	0	0	0	0	30	0	111.2	0	0	0	0	0	0
ENSG00000242125	SNHG3	1.4	5.1	0	2.7	6.5	0	4	3	9.1	4.4	12.8	1.1	0	0	0	0	0	0	0	0	0	0	0	0	82.1	0	68.4	94.9	0	14.9	0	56.4	0	0	0	0	0	40.3
ENSG00000231468	PRDX3P2	0	0	5	0	0	0	0	0	1.3	0	0	0	0	0	0	0	0	0	0	0	0	0	0	0	0	0	0	0	0	0	0	0	0	0	0	0	0	0
ENSG00000279443	AL513497.1	0	0	0	1.3	0	0	9.3	0	0	3.6	8.9	18.1	0	4.1	0	0	0	0	0	0	0	0	0	0	0	0	0	0	0	26.9	0	0	0	0	0	0	0	0
ENSG00000180098	TRNAU1AP	3.4	11.7	21.3	8.7	5.1	16.1	31.9	31.4	41.4	17.8	23	10.2	0	0	45.4	0	0	0	4.4	0	75.6	0	787.2	0	0	0	0	73.8	89.1	31.9	1.6	13	0	0	0	0	0	0
ENSG00000197989	SNHG12	141.6	107.5	112.1	119.4	89.6	132.2	42.5	15	33.6	40	37	79.4	3.5	267.7	0	2.5	74.3	75.5	0	0	119.7	5	10.9	5.4	67.6	15.1	22.5	5.3	3.6	73.6	248.4	120.5	53.8	0	0	0	0	40.3
ENSG00000120656	TAF12	66.4	38.8	13.5	56	57.1	42.4	54.5	37.4	23.3	29.4	16.6	17	1.7	0	136.3	153.8	14.1	0	2.2	112.3	0	0	32.8	0	186.6	3.8	78.8	0	73.4	19.5	0	44.1	0	0	0	0	0	0
ENSG00000188060	RAB42	16.9	54.1	21.3	47.3	59.3	36.5	2.7	4.5	1.3	0	0	5.7	0	0	0	0	94.3	0	0	0	0	0	0	0	0	0	0	0	0	0	0	48.2	0	0	0	64.4	0	40.3
ENSG00000229388	LINC01715	0	0	0	0	0	0	1.3	0	0	0	0	0	0	0	0	0	0	0	0	0	0	0	0	0	0	0	0	0	0	0	0	0	0	0	0	0	0	0
ENSG00000162419	GMEB1	6.8	4.4	9.2	4.7	32.5	30.7	13.3	13.5	18.1	10.7	15.3	20.4	0	8.1	0	110.4	2.4	0	0	0	173.2	0	0	0	29	0	9.5	0	21.4	31.9	1.6	8.9	0	0	0	0	0	40.3
ENSG00000198492	YTHDF2	62.3	82.6	59.6	84.7	164.1	146.1	183.3	254.3	196.5	209.1	235.9	233.6	50.3	328.6	31.1	214.5	396.1	154.5	0	0	352.7	25.2	10.9	5.4	645.1	7.6	92.6	42.2	62.7	189.4	289.8	169.8	0	0	0	0	0	80.5
ENSG00000116329	OPRD1	1.4	0	2.1	4.7	8	0	0	4.5	0	0	1.3	0	0	0	0	0	2.4	0	0	0	0	0	0	0	0	0	0.9	0	0	0.2	0	0	0	0	0	0	0	0
ENSG00000159023	EPB41	7.5	9.5	7.1	1.3	18.8	14.6	15.9	4.5	1.3	12.5	3.8	12.5	72.8	8.1	0	0	0	0	0	0	0	0	0	0	24.1	0	50.2	0	6.4	2.7	0	0.7	0	0	0	0	0	0
ENSG00000225616	AL138785.1	97.6	119.2	125.6	85.3	77.3	103	61.1	53.8	40.1	62.3	45.9	63.5	50.3	44.6	102.8	126.5	2.4	111.4	19.8	0	289.7	0	153.1	5.4	51.5	30.2	148	36.9	34.9	74.9	62.1	78.6	0	0	67.4	0	0	120.8
ENSG00000277958	Metazoa_SRP	0	0	0	0	0	0.7	0	0	1.3	1.8	1.3	0	0	0	0	0	1.2	0	0	0	0	0	0	0	0	0	0	0	0	0.4	0	0	0	0	0	0	0	0
ENSG00000253304	TMEM200B	0	8.8	0	0	3.6	0	0	0	0	0.9	0	0	0	0	0	0	34.2	0	0	0	0	0	0	0	0	0	0	0	2.9	8.8	0	0	0	0	0	0	0	0
ENSG00000116350	SRSF4	109.8	75.3	61.7	52	46.3	102.2	70.4	41.9	90.5	63.2	90.5	61.2	409.1	0	77.7	9.9	369	0	405.4	9.1	0	0	415.4	0	186.6	0	135.9	5.3	50.6	88.7	334.4	31.9	0	0	0	128.8	0	40.3
ENSG00000116353	MECR	19	3.7	3.5	1.3	16.6	6.6	9.3	17.9	24.6	24	35.7	28.4	1.7	0	0	0	7.1	0	0	0	0	0	0	0	29	0	21.6	0	0	20.1	106.7	70.8	0	0	67.4	64.4	0	40.3
ENSG00000060656	PTPRU	25.1	5.1	10.6	14	13.7	2.2	223.2	224.4	153.9	110.3	243.6	178.1	0	4.1	80.1	1.2	0	0	0	0	0	0	470.1	38.1	135.1	241.7	0.9	232	29.9	145.8	0	149.8	0	61.1	0	0	0	0
ENSG00000186056	MATN1-AS1	0	2.9	0	6.7	0	0	2.7	0	2.6	4.4	3.8	0	0	0	0	0	0	0	0	0	0	0	0	0	0	0	0	0	0	11.7	0	0	0	0	0	0	0	0
ENSG00000162511	LAPTM5	866.5	1342.4	1144.7	948.2	1091.5	991	46.5	80.8	16.8	148.6	24.2	77.1	329.3	283.9	157.8	322.4	413.7	592.8	114.6	546.3	475.5	136.3	32.8	179.8	485.9	120.9	1308.8	5.3	266.5	115.6	702.2	26.7	161.5	0	2494.1	0	120.5	322.2
ENSG00000223382	LINC01778	0	0	0	0	0	0	0	0	0	0	0	0	0	0	0	0	0	0	0	0	0	0	0	0	0	0	0	0	0	0.2	0	0	0	0	0	0	0	0
ENSG00000162512	SDC3	98.9	87	80.2	64	63.6	24.1	59.8	91.2	65.9	56	61.2	68	1.7	109.5	211.6	102.9	0	937.8	108	163.9	122.8	10.1	0	21.8	56.3	3.8	147.1	0	38.5	32.7	0	84.5	0	0	0	0	0	0
ENSG00000134644	PUM1	128.7	149.9	132.7	140	191.6	170.2	276.3	302.1	303.8	229.5	196.4	247.2	308.5	16.2	67	34.7	290	0	271	440.1	548	979.6	43.7	0	316.9	287	190.4	5.3	114.7	191.3	213.4	237.6	0	0	0	0	9937.4	80.5
ENSG00000232768	AL356320.1	0	0	0	0	0	0	0	0	0	0	0	1.1	0	0	0	0	0	0	0	0	0	0	0	0	0	0	0	0	0	0	0	0	0	0	0	0	0	0
ENSG00000225142	AC114495.1	0.7	0	0	0	0	0	0	0	0	0	0	0	0	0	0	0	0	0	0	0	0	0	0	0	0	0	0	0	0	0	0	0	0	0	0	0	0	0
ENSG00000084628	NKAIN1	0	0	0	0	0	0	0	0	1.3	0	0	0	0	0	0	0	0	0	0	0	0	0	0	0	0	0	0	0	0	0	0	0	0	0	0	0	0	0
ENSG00000060688	SNRNP40	37.9	35.1	16.3	8.7	13.7	2.2	45.2	35.9	60.8	41.8	44.6	53.3	1.7	555.7	1.2	114.1	0	0	0	0	0	0	0	0	24.1	3.8	28.6	0	0	5.9	0	33.4	0	0	0	0	0	0
ENSG00000229447	AC114495.2	0	0	0.7	9.3	30.4	0	0	16.5	0	0	0	5.7	0	0	0	0	0	0	0	0	0	0	0	0	0	0	0	0	0	0	0	0	0	0	0	0	0	0
ENSG00000121766	ZCCHC17	33.2	16.1	8.5	13.3	12.3	0	17.3	6	24.6	16	20.4	22.7	0	4.1	0	0	1.2	0	8.8	0	0	0	371.7	0	3.2	0	0	522	0	41.7	0	10	0	0	0	0	0	40.3
ENSG00000121769	FABP3	19.6	15.4	36.9	19.3	8.7	115.4	13.3	10.5	18.1	1.8	1.3	11.3	0	0	0	0	0	0	0	0	3.1	0	0	0	0	3.8	0	0	0	0.2	0	0	0	0	0	0	0	0
ENSG00000168528	SERINC2	10.2	10.2	22.7	16.7	7.2	0	213.9	219.9	169.4	153	139	282.4	0	8.1	0	0	0	0	0	0	0	0	0	0	0	105.8	0.9	379.7	0	101.1	0	149	0	0	0	64.4	0	40.3
ENSG00000260386	LINC01225	0	0	0	0	0	0	0	0	0	0	2.6	0	0	0	0	0	0	0	0	0	0	0	0	0	0	0	0	0	0	0	0	0	0	0	0	0	0	0
ENSG00000284543	LINC01226	7.5	0	0	0	0	0	2.7	0	0	3.6	0	0	0	0	0	0	0	0	0	0	0	0	0	0	3.2	0	0	0	0	0.4	0	0	0	0	0	0	0	0
ENSG00000142910	TINAGL1	0.7	12.4	18.5	12	23.1	27.8	45.2	86.8	65.9	51.6	48.5	10.2	3.5	150.1	0	91.8	10.6	3.6	821.7	0	3.1	0	0	0	51.5	3.8	0.9	0	51.3	66.9	0	142	0	0	0	0	0	0
ENSG00000162517	PEF1	19.6	40.2	25.5	22.7	53.5	43.1	34.5	43.4	50.4	70.3	31.9	83.9	1.7	8.1	34.7	18.6	3.5	0	0	0	0	0	0	0	57.9	3.8	139.4	0	24.2	76.6	164	122	0	0	0	0	0	40.3
ENSG00000084636	COL16A1	46.7	95.8	41.9	64.7	138.1	57	18.6	0	14.2	12.5	17.9	44.2	213.2	4.1	33.5	24.8	361.9	3.6	61.7	0	173.2	484.7	10.9	0	1.6	0	44.1	0	5	27.3	81.2	24.1	0	0	0	0	0	0
ENSG00000121753	ADGRB2	34.6	19.7	16.3	14.7	23.1	11	83.7	53.8	82.7	18.7	47.2	43.1	0	0	0	31	1.2	3.6	52.9	0	0	196.9	10.9	0	0	117.1	22.5	0	0.7	46.6	22.3	45.2	0	0	0	0	0	0
ENSG00000134668	SPOCD1	14.9	49.7	19.2	28	71.6	33.6	0	3	0	5.3	1.3	9.1	1.7	0	0	0	0	0	0	0	0	0	0	0	0	0	1.7	0	7.8	2.5	0	0.4	0	0	0	0	0	0
ENSG00000203620	AL354919.1	0	1.5	0	0.7	0	0	0	0	0	0	0	0	0	0	0	0	0	0	0	0	0	0	0	0	0	0	0	0	0	0	0	0	0	0	0	0	0	0
ENSG00000269967	AL136115.2	0	0	0	0	0	0	0	0	1.3	0	0	0	0	0	0	0	0	0	0	0	0	0	0	0	0	0	0	0	0	0	0	0	0	0	0	0	0	0
ENSG00000184007	PTP4A2	483	421.9	456.3	408.1	549.4	417.7	698.7	852.6	858.5	798	735.8	731.5	369.2	304.2	292.9	499.7	356	722.2	460.4	1626.7	3.1	15.1	1071.4	441.2	410.3	294.6	516.8	337.5	628.5	695.2	213.4	906.4	1076.6	183.4	202.2	128.8	180.7	402.7
ENSG00000121774	KHDRBS1	147.7	155.7	157.5	212	150.4	103.7	271	309.6	261.2	230.4	233.4	257.5	93.6	4.1	151.9	209.6	305.3	0	564	330.8	289.7	25.2	1169.8	10.9	32.2	18.9	154.9	126.6	235.9	335.4	293	157.9	0	122.3	0	128.8	0	40.3
ENSG00000203325	AL445248.1	0	0	0	0	0	0	1.3	0	0	0	0	0	0	0	0	0	0	0	0	0	0	0	0	0	0	0	0	0	0	0	0	0	0	0	0	0	0	0
ENSG00000121775	TMEM39B	19.6	15.4	7.1	34	63.6	4.4	19.9	7.5	24.6	16.9	24.2	21.5	1.7	0	52.6	0	0	0	57.3	0	0	0	0	0	0	0	49.3	0	0	25.6	0	39.3	0	0	0	0	0	0
ENSG00000276493	Metazoa_SRP	0.7	1.5	0	0	0	0.7	0	0	0	0	0	0	0	0	0	0	0	0	0	0	0	0	0	0	0	0	0	0	0	0	0	0	0	0	0	0	0	0
ENSG00000025800	KPNA6	32.5	43.9	41.9	40.7	67.2	18.3	142.1	155.6	143.5	115.7	128.8	146.3	5.2	4.1	87.3	19.8	0	0	63.9	0	0	5	0	0	215.6	3.8	34.6	131.8	27.8	165.3	125.8	190.6	0	61.1	0	0	0	0
ENSG00000084652	TXLNA	61.6	106	73.8	72.7	41.9	111	123.5	97.2	126.7	105	154.3	127	0	8.1	0	187.2	35.4	132.9	88.1	0	462.9	403.9	32.8	0	3.2	3.8	82.2	0	49.9	102.8	105.1	119	53.8	0	4516.3	0	0	80.5
ENSG00000160050	CCDC28B	6.1	0	0	1.3	0	0	1.3	1.5	1.3	1.8	0	0	0	0	0	0	0	0	0	0	0	0	0	0	0	0	0	0	0	7.3	0	0.4	0	0	0	0	0	0
ENSG00000224066	AL049795.1	0	0	0	0	0	31.4	4	0	0	5.3	0	0	0	0	0	0	0	0	0	0	0	0	0	0	0	0	0	0	0	0	0	0	0	0	0	0	0	0
ENSG00000160051	IQCC	0	1.5	2.8	0	0	0.7	5.3	0	1.3	5.3	2.6	2.3	0	0	0	0	0	0	0	0	0	0	0	0	0	0	0	0	0	0.2	1.6	0	0	0	0	0	0	0
ENSG00000160055	TMEM234	3.4	9.5	6.4	15.3	28.9	0	41.2	23.9	20.7	18.7	20.4	28.4	0	4.1	0	0	0	0	0	0	0	0	0	0	117.4	3.8	26	0	39.9	33.6	84.4	0	0	0	0	0	0	0
ENSG00000084623	EIF3I	63	43.1	46.1	28.7	57.1	63.5	139.5	137.6	153.9	128.1	118.6	111.1	1.7	283.9	165	65.7	0	0	0	264	0	131.3	10.9	0	405.4	86.9	24.2	10.5	80.5	138.5	100.3	191.7	0	0	0	0	0	0
ENSG00000220785	MTMR9LP	0	4.4	8.5	0	4.3	49.7	1.3	0	2.6	2.7	7.7	3.4	0	0	50.2	0	0	0	0	0	0	0	0	0	0	3.8	0	0	0	0	9.6	0.4	0	0	0	0	0	0
ENSG00000183615	FAM167B	0	0	17.7	8.7	0	0	4	0	3.9	3.6	3.8	13.6	0	105.5	0	0	0	0	0	0	0	0	0	0	0	0	0	0	0	9.9	0	18.9	0	0	0	0	0	0
ENSG00000182866	LCK	0	28.5	14.2	11.3	39	0	0	9	0	0.9	1.3	0	0	0	0	0	0	0	319.4	0	0	5	0	0	0	0	0	0	0	0	90.8	0	0	0	0	0	0	0
ENSG00000116478	HDAC1	30.5	23.4	44.7	43.3	6.5	48.9	69.1	17.9	46.5	37.4	68.9	85.1	5.2	137.9	15.5	1.2	0	0	251.2	0	0	0	0	0	0	7.6	72.7	0	153.2	73.4	0	96.4	0	0	0	0	60.2	0
ENSG00000175130	MARCKSL1	27.8	60.7	42.6	108	86	39.4	1069.4	1132.3	1149.4	921.7	960.2	1130.7	19.1	36.5	110	2.5	84.9	118.6	8.8	12.1	0	5	229.6	217.9	395.8	1087.7	80.5	10.5	270.1	807	127.4	1145.2	53.8	244.6	0	128.8	60.2	120.8
ENSG00000225828	FAM229A	4.1	2.2	1.4	6	12.3	27	5.3	1.5	10.3	12.5	1.3	0	0	0	0	0	57.8	0	0	30.3	0	0	0	0	0	0	0.9	0	0.7	0.2	0	0	0	61.1	0	0	0	0
ENSG00000160058	BSDC1	58.9	95	56.1	36.7	41.9	25.6	136.8	137.6	106	97	63.8	139.5	109.2	8.1	19.1	29.8	17.7	3.6	0	0	198.4	10.1	0	196.1	32.2	7.6	109.9	0	70.5	90.6	89.2	180.5	0	0	0	0	0	80.5
ENSG00000273274	ZBTB8B	0	0	0	0	0	0	1.3	0	0	0	6.4	1.1	0	0	0	0	0	0	0	0	0	0	0	0	0	0	0	0	0	0.8	0	0	0	0	0	0	0	0
ENSG00000160062	ZBTB8A	13.5	6.6	17.7	10	11.6	2.2	23.9	1.5	29.7	14.2	8.9	6.8	0	0	106.4	0	0	0	0	0	0	0	0	0	0	30.2	0	0	60.6	34.8	0	8.5	0	0	0	0	0	0
ENSG00000176261	ZBTB8OS	73.2	50.4	41.2	60	29.6	58.4	78.4	52.4	33.6	49.8	43.4	31.8	0	4.1	171	0	0	204.8	196.1	0	176.4	0	0	0	0	3.8	65.8	0	30.6	29.4	1.6	10	53.8	0	0	64.4	0	80.5
ENSG00000162521	RBBP4	148.4	86.3	80.9	86.7	66.5	71.6	268.3	254.3	193.9	204.6	229.5	203	32.9	28.4	0	29.8	1.2	176.1	110.2	452.2	66.1	323.2	787.2	5.4	53.1	71.8	110.8	0	102.6	284.7	84.4	352.6	53.8	61.1	0	64.4	0	40.3
ENSG00000162520	SYNC	4.1	10.2	5.7	0	0	9.5	8	0	0	2.7	2.6	0	0	0	0	0	0	0	0	0	0	0	0	0	0	0	0	0	0	0	0	0	0	0	0	0	0	0
ENSG00000162522	KIAA1522	6.8	23.4	12.8	20.7	6.5	20.4	350.7	308.1	391.8	299.8	403	366.3	1.7	40.6	53.8	1.2	80.2	0	2.2	9.1	299.2	5	0	103.5	170.5	551.4	1.7	0	183.1	288.7	1.6	362.6	0	0	0	64.4	60.2	80.5
ENSG00000134684	YARS	89.4	62.1	34.8	81.3	14.5	69.4	118.2	110.7	111.2	111.2	114.8	121.4	5.2	4.1	1.2	65.7	22.4	0	77.1	3	321.2	0	0	0	0	645.8	152.3	5.3	3.6	133.8	19.1	152.4	53.8	0	0	0	60.2	80.5
ENSG00000116497	S100PBP	19	25.6	34.1	20.7	34	35.1	31.9	68.8	38.8	32.9	24.2	56.7	0	4.1	0	0	0	0	30.8	0	0	0	0	168.9	0	3.8	12.1	0	0	27.3	0	70.8	0	0	0	0	0	0
ENSG00000160097	FNDC5	0.7	2.9	16.3	0	0	0	0	0	0	0	1.3	0	0	0	0	0	0	0	0	88	0	0	0	0	0	0	0	0	0	0	0	0	0	0	0	0	0	0
ENSG00000121905	HPCA	0	0.7	0	0	0	0	2.7	0	0	0	0	0	0	0	0	0	0	0	0	0	0	0	0	0	0	0	0	0	0	0	0	0	0	0	0	0	0	0
ENSG00000121900	TMEM54	7.5	18.3	5	3.3	3.6	0	71.7	59.8	111.2	73.8	88	81.7	0	4.1	0	0	0	0	0	0	610.9	267.6	0	0	49.9	0	0	10.5	0	61.3	0	17.1	0	61.1	0	0	0	0
ENSG00000116514	RNF19B	14.2	5.1	18.5	0	0	24.8	4	7.5	12.9	0	1.3	9.1	0	0	0	0	0	0	0	0	0	0	0	0	0	0	0	0	0	0	0	0	0	0	0	0	0	0
ENSG00000217644	AL355864.1	0	0	0	0	0	0	0	0	0	0	0	1.1	0	0	0	0	0	0	0	0	0	0	0	0	0	0	0	0	0	0	0	0	0	0	0	0	0	0
ENSG00000004455	AK2	43.4	65.1	29.1	47.3	41.9	32.9	102.3	112.2	111.2	97	81.6	91.9	32.9	4.1	153.1	75.6	2.4	0	0	3	0	363.5	10.9	0	114.2	22.7	1.7	0	83.4	83.1	0	59.7	0	0	0	0	0	40.3
ENSG00000276645	Metazoa_SRP	0	0	0	0	0	0	1.3	4.5	2.6	2.7	0	3.4	0	0	0	0	0	0	0	0	0	0	0	0	0	0	0	0	0	0	0	0	0	0	0	0	0	0
ENSG00000142920	AZIN2	14.2	14.6	8.5	10.7	0	5.1	2.7	9	5.2	11.6	5.1	0	1.7	4.1	0	0	0	0	0	0	0	0	0	0	0	0	0	58	0	29.8	1.6	48.2	0	0	0	0	0	0
ENSG00000278997	AL662907.1	11.5	2.9	0	0	3.6	0	0	0	1.3	0	2.6	2.3	0	0	0	0	0	0	0	0	0	0	0	0	0	0	0	0	0	0	0	0	0	0	0	0	0	0
ENSG00000116525	TRIM62	10.2	10.2	5	2.7	0	0.7	42.5	47.9	40.1	32.9	34.4	17	0	0	0	0	0	0	0	0	0	0	0	0	29	158.6	0	0	0	9.9	0	1.9	0	0	0	0	0	0
ENSG00000279179	AL662907.2	0	0	0	0	0	2.2	0	0	0	0	0	0	0	0	0	0	0	0	0	0	0	0	0	0	0	0	0	0	0	0	0	0	0	0	0	0	0	0
ENSG00000160094	ZNF362	15.6	33.6	45.4	20.7	64.3	23.4	74.4	89.7	65.9	41.8	67.6	70.3	6.9	4.1	88.5	0	107.3	0	94.7	0	207.8	0	0	0	4.8	3.8	0.9	0	64.1	77	0	27.1	0	0	0	0	0	0
ENSG00000225313	AL513327.1	0	0	5.7	0	0	0	0	0	0	0	0	0	0	0	0	0	0	0	0	0	0	0	0	0	0	0	0	0	0	0	0	0	0	0	0	0	0	0
ENSG00000134686	PHC2	56.2	62.9	27	58.7	81	5.1	90.3	37.4	100.8	48	127.5	59	1.7	16.2	0	0	244	0	112.4	0	56.7	0	721.6	179.8	17.7	64.2	168.8	321.7	0.7	76.8	36.6	47.8	0	0	0	0	120.5	40.3
ENSG00000222112	RN7SKP16	0	5.8	0	0	0	0	0	0	0	0	0	0	0	0	0	0	0	0	0	0	0	0	0	0	0	0	0	0	0	0	0	0.4	0	0	0	0	0	0
ENSG00000121903	ZSCAN20	0	0	0	2.7	0	0	0	0	0	0	1.3	0	0	0	0	0	0	0	0	0	0	0	0	0	0	0	0	0	0	0	0	0	0	0	0	0	0	0
ENSG00000235907	AC115285.1	84	30	48.3	46.7	85.3	17.5	66.4	35.9	34.9	15.1	25.5	56.7	0	8.1	4.8	0	0	0	0	0	0	0	0	0	25.7	3.8	4.3	5.3	0	17.2	219.7	1.5	0	0	0	0	0	40.3
ENSG00000121904	CSMD2	0	3.7	16.3	10	29.6	12.4	0	0	0	0	0	2.3	0	0	0	0	0	0	0	36.4	0	0	0	0	0	0	0	0	0	0	0	26.7	0	0	0	0	0	0
ENSG00000227000	HSPD1P14	0	0	0	0	0	0	0	0	0	0	1.3	0	0	0	0	0	0	0	0	0	0	0	0	0	0	0	0	0	0	0	0	0	0	0	0	0	0	0
ENSG00000142698	C1orf94	0	0	0	0	0	0	1.3	0	0	0	0	0	0	0	0	0	0	0	0	0	0	0	0	0	0	0	0	0	0	0	0	0	0	0	0	0	0	0
ENSG00000163866	SMIM12	35.9	8	7.1	28.7	13	30.7	2.7	6	11.6	16	24.2	17	0	0	0	0	0	0	0	0	0	0	0	0	0	0	19.9	0	0.7	19.9	133.8	4.4	0	0	0	0	60.2	0
ENSG00000189280	GJB5	0	0	0	0	0	0	2.7	3	15.5	15.1	7.7	2.3	0	0	0	0	0	0	0	0	0	0	0	0	0	0	0	0	0	0	0	0	0	0	0	0	0	0
ENSG00000188910	GJB3	0	0	0	0	0	0	5.3	3	2.6	0	12.8	0	0	0	0	0	7.1	0	0	0	0	0	0	0	0	0	0	0	0.7	0	0	9.6	0	0	0	0	0	0
ENSG00000187513	GJA4	6.1	5.1	36.2	16	13	0	4	0	6.5	0	0	9.1	0	0	102.8	0	0	0	0	0	0	0	0	0	0	0	0	0	0	0	0	0	0	0	0	0	0	0
ENSG00000116544	DLGAP3	0	0	0	0	0	0	0	0	0	0	1.3	0	0	0	0	0	0	0	0	0	0	0	0	0	0	0	0	0	0	0	0	0	0	0	0	0	0	0
ENSG00000241014	AC114490.1	73.2	9.5	19.9	5.3	28.2	27.8	0	0	0	0.9	5.1	1.1	0	0	0	0	0	0	0	0	0	0	164	0	38.6	0	0	0	0	0	0	0	0	0	0	0	0	0
ENSG00000163867	ZMYM6	32.5	26.3	36.9	62.7	17.3	16.1	13.3	29.9	29.7	35.6	35.7	32.9	0	8.1	34.7	0	273.5	0	2.2	0	0	0	0	0	20.9	0	96.1	0	0	16.6	0	31.1	0	0	0	0	0	40.3
ENSG00000197056	ZMYM1	6.1	3.7	2.1	3.3	0	10.2	6.6	4.5	3.9	0	3.8	9.1	0	0	0	0	0	0	0	0	0	0	0	0	0	0	34.6	0	0	2.3	0	14.1	0	0	0	0	0	0
ENSG00000116560	SFPQ	124	245.7	264.7	226.7	254.4	287.7	352	263.3	298.7	332.7	414.4	499	495.8	620.6	391	156.2	182.7	219.2	337.1	24.3	440.9	560.5	21.9	0	286.4	1087.7	354.9	843.7	53.4	400.7	280.2	228.7	0	122.3	134.8	64.4	120.5	201.4
ENSG00000201868	Y_RNA	0	0	0	2	0	0	0	0	0	0	0	0	0	0	0	0	0	0	0	0	0	0	0	0	0	0	0	0	0	0	0	0	0	0	0	0	0	0
ENSG00000146463	ZMYM4	63.7	43.1	70.3	35.3	107.7	72.3	46.5	76.3	50.4	66.7	80.3	78.3	0	531.4	0	47.1	7.1	0	2.2	33.4	0	5	0	0	125.5	11.3	53.7	0	71.3	71.1	111.5	34.1	0	0	0	128.8	0	40.3
ENSG00000201542	SNORA62	0	1.5	0	2	0	0	13.3	0	5.2	0	0	0	140.4	0	0	0	0	0	0	0	0	0	0	0	0	3.8	0	0	22.1	11.7	0	0	53.8	0	0	0	0	0
ENSG00000229994	RPL5P4	0.7	4.4	5.7	13.3	3.6	10.2	12	1.5	14.2	3.6	2.6	3.4	0	0	0	0	0	0	0	0	0	0	0	0	3.2	0	0	0	30.6	0	0	3.3	0	0	0	0	0	0
ENSG00000278702	Metazoa_SRP	0	0	0	0	0	0	0	0	0	0	0	0	0	0	0	0	7.1	0	0	0	0	0	0	0	0	0	0	0	0	0.2	0	0	0	0	0	0	0	0
ENSG00000142687	KIAA0319L	14.9	45.3	64.6	70	26	65	135.5	182.5	140.9	166.4	119.9	140.6	192.4	20.3	200.9	71.9	0	46.7	24.2	139.6	3.1	0	0	0	141.6	596.7	55.4	0	102.6	143.5	0	123.1	0	0	0	0	0	40.3
ENSG00000236274	AC004865.1	0	0.7	0	0	0	0	0	0	0	0	0	0	0	0	0	0	0	0	0	0	0	0	0	0	0	0	0	0	0	0	0	0	0	0	0	0	0	0
ENSG00000020129	NCDN	14.2	0.7	23.4	6	28.9	8	61.1	61.3	49.1	54.3	30.6	62.4	0	4.1	0	0	0	0	0	0	0	0	0	0	197.9	3.8	0	0	34.2	25.8	0	61.9	0	0	0	0	0	0
ENSG00000239636	AC004865.2	0	7.3	4.3	6.7	8	5.8	0	0	0	5.3	0	1.1	0	4.1	1.2	0	83.7	0	0	0	0	308	0	0	0	0	0	0	0	3.8	0	0	0	0	0	0	0	0
ENSG00000126067	PSMB2	107.7	119.9	98.6	122	128.7	112.5	209.9	181	209.5	250	219.3	198.5	138.7	154.1	172.2	21.1	40.1	294.6	136.6	254.9	570	0	10.9	5.4	172.1	98.2	257.9	0	86.9	173.5	0	113.4	0	61.1	0	0	0	161.1
ENSG00000142686	C1orf216	19.6	5.1	0.7	26.7	28.2	16.8	22.6	0	19.4	1.8	2.6	5.7	0	0	0	1.2	0	0	39.7	0	0	0	0	217.9	64.4	0	6.1	0	0	34.8	0	21.9	0	61.1	67.4	0	0	80.5
ENSG00000092853	CLSPN	5.4	4.4	0	0	0	0	2.7	0	9.1	7.1	20.4	10.2	0	0	0	0	0	0	0	0	0	0	0	0	20.9	0	0	0	0	20.3	1.6	0.7	0	0	0	0	0	0
ENSG00000134698	AGO4	46.1	22.7	25.5	32.7	5.1	40.9	38.5	35.9	31	34.7	34.4	40.8	1.7	0	32.3	2.5	37.7	0	149.8	36.4	0	0	0	0	109.4	68	18.2	0	0	4.2	0	58.2	0	0	0	0	60.2	40.3
ENSG00000092847	AGO1	19	69.5	23.4	30.7	34	79.6	63.8	68.8	36.2	40	42.1	72.6	1.7	133.9	78.9	0	15.3	7.2	0	197.3	195.2	5	131.2	0	6.4	0	33.8	0	0	29.6	0	16.7	0	0	0	0	0	0
ENSG00000271914	AL139286.2	0	0	0	0	0	0	0	0	0	4.4	0	0	0	0	0	0	0	0	0	0	0	0	0	0	0	0	0	0	0	0	0	0	0	0	0	0	0	0
ENSG00000126070	AGO3	22.4	31.4	65.3	20.7	26	76	62.4	7.5	47.8	42.7	54.8	28.4	13.9	0	0	42.2	0	366.5	277.6	0	3.1	0	185.9	0	304.1	211.5	20.8	664.4	64.1	14.5	315.3	58.6	0	61.1	337	0	0	40.3
ENSG00000271554	AL138787.2	0	0	0	0	0	0	5.3	0	0	5.3	0	0	0	0	0	0	0	0	0	0	0	0	0	0	0	0	0	0	0	0	0	0	0	0	0	0	0	0
ENSG00000092850	TEKT2	0	0	0	0	0	0	8	0	0	1.8	1.3	3.4	0	0	0	0	0	0	0	0	0	0	0	0	0	3.8	0	0	2.9	0	0	0	0	0	0	0	0	0
ENSG00000116863	ADPRHL2	1.4	27.8	10.6	21.3	0	0	25.2	12	7.8	31.1	15.3	36.3	254.8	12.2	0	0	0	0	0	0	0	1060.3	0	0	178.6	7.6	144.6	0	35.6	43.8	0	0	53.8	0	0	0	0	40.3
ENSG00000171812	COL8A2	112.5	98	75.2	71.3	71.6	63.5	21.3	50.9	7.8	54.3	7.7	17	0	4.1	116	217	216.9	862.3	0	637.3	532.2	0	43.7	92.6	0	0	0.9	0	17.8	25.8	0	0.4	0	0	0	64.4	0	0
ENSG00000054116	TRAPPC3	10.2	38.8	16.3	21.3	100.5	3.7	15.9	65.8	38.8	29.4	44.6	44.2	0	8.1	7.2	0	2.4	0	24.2	0	6.3	0	0	0	37	7.6	28.6	0	210.2	24.5	0	0	0	0	0	0	0	40.3
ENSG00000116871	MAP7D1	199.9	216.4	220	177.4	216.1	116.8	162.1	119.7	156.4	115.7	117.3	156.5	57.2	275.8	290.6	42.2	264	287.4	83.7	166.9	0	5	0	0	72.4	90.6	299.5	1044.1	226.6	118.9	377.4	110.1	0	0	67.4	0	0	40.3
ENSG00000264592	RN7SL131P	0.7	0	0.7	0	1.4	0.7	0	0	1.3	0.9	5.1	1.1	0	0	1.2	0	0	0	0	0	0	0	0	0	0	0	0	0	0	5	0	0	0	0	0	0	0	0
ENSG00000054118	THRAP3	86.7	130.9	114.3	110	168.4	168	106.3	128.6	155.1	176.2	202.8	156.5	116.1	69	47.8	54.6	60.1	233.5	52.9	3	78.7	621.1	612.2	5.4	104.6	3.8	98.7	442.9	115.4	167.2	74.8	112	0	0	0	0	0	40.3
ENSG00000214193	SH3D21	12.2	18.3	7.1	9.3	10.1	11	31.9	38.9	36.2	8	47.2	17	0	0	0	0	0	0	0	0	0	0	0	0	3.2	41.5	0	0	0	3.4	0	0.7	0	0	0	0	0	0
ENSG00000142694	EVA1B	98.2	162.3	80.9	124	93.2	65	89	61.3	63.4	97	34.4	106.6	0	8.1	217.6	0	71.9	183.2	0	0	0	277.7	0	152.5	69.2	290.8	22.5	0	58.4	60.2	66.9	107.5	53.8	61.1	0	0	120.5	40.3
ENSG00000116883	AL591845.1	0	0	2.8	10.7	0	0	8	0	1.3	8	2.6	9.1	0	0	0	0	0	0	0	0	0	0	0	0	0	0	0	0	0	5.5	0	0	0	0	0	0	0	0
ENSG00000196182	STK40	121.3	133.8	124.2	143.4	117.8	85.4	154.1	172	187.5	105	168.3	144	13.9	0	102.8	260.4	240.5	319.8	81.5	112.3	0	15.1	21.9	92.6	83.7	0	274.4	142.4	3.6	149.8	0	67.1	0	0	0	128.8	0	120.8
ENSG00000181817	LSM10	40.6	57.8	11.4	20	10.8	34.3	9.3	28.4	27.2	32.9	28.1	38.6	0	4.1	20.3	173.6	0	0	134.4	0	0	0	21.9	0	0	0	45.9	0	0	23.7	0	93.8	0	0	0	0	60.2	40.3
ENSG00000116885	OSCP1	5.4	20.5	1.4	3.3	11.6	0	13.3	23.9	14.2	7.1	15.3	30.6	1.7	4.1	0	0	0	35.9	0	0	0	207	0	0	0	0	0	0	0	10.1	0	20.4	0	0	0	0	0	0
ENSG00000201448	SNORA63C	0	0	0	0	0	0	1.3	0	0	0.9	0	0	0	0	0	0	0	0	0	0	0	0	0	0	0	0	0	0	0	0	0	0	0	0	0	0	0	0
ENSG00000116898	MRPS15	0	16.8	5	29.3	0	34.3	25.2	47.9	23.3	30.2	14	18.1	1.7	0	2.4	0	28.3	0	0	0	0	0	0	0	90.1	0	16.4	0	0	23.5	1.6	19.3	0	0	0	0	0	0
ENSG00000119535	CSF3R	11.5	7.3	15.6	34	10.1	8.8	1.3	1.5	5.2	12.5	23	0	0	0	0	2.5	0	0	63.9	0	0	0	0	0	0	0	10.4	0	1.4	0	0	12.6	0	0	0	0	0	0
ENSG00000163873	GRIK3	0	0	0	0	0	0	0	0	1.3	0	0	0	0	0	0	0	0	0	0	0	0	0	0	0	0	0	0	0	0	14.9	0	0	0	61.1	0	0	0	0
ENSG00000230451	RPS29P6	0	0	0	0	0	0	0	0	0	0	0	0	0	0	0	0	0	0	0	0	0	0	0	0	0	0	0	0	0.7	0	0	0	0	0	0	0	0	0
ENSG00000233621	LINC01137	12.9	0	0	0	0	0	0	0	1.3	3.6	0	0	0	0	0	0	0	0	0	0	0	0	0	0	0	0	0	0	0	0	0	0	0	0	0	0	0	0
ENSG00000163874	ZC3H12A	3.4	16.1	7.1	0.7	8.7	0	29.2	13.5	34.9	53.4	33.2	12.5	0	4.1	0	0	0	0	0	0	0	0	0	0	0	0	0	47.5	11.4	19.5	0	49.7	0	0	0	0	0	0
ENSG00000163875	MEAF6	73.8	95.8	123.5	77.3	125.8	81.8	147.5	143.6	153.9	133.5	149.2	89.6	3.5	12.2	0	50.8	0	0	0	0	0	5	0	0	115.8	313.5	51.9	5.3	62	233.1	151.3	193.2	0	183.4	67.4	0	0	120.8
ENSG00000163877	SNIP1	39.3	11	1.4	15.3	17.3	8.8	23.9	7.5	22	17.8	45.9	20.4	0	0	0	0	20	0	0	0	0	0	0	0	0	71.8	42.4	0	0	2.5	0	42.3	0	0	0	0	0	0
ENSG00000232273	FTH1P1	1592.7	1793.5	1728.7	1420.9	1387.9	1534.3	220.5	228.9	177.1	165.5	118.6	307.4	480.2	8.1	353.9	257.9	294.7	3.6	308.4	3	1341.5	10.1	10.9	0	535.7	11.3	1393.6	147.6	275	87.5	498.4	100.5	0	61.1	134.8	0	60.2	644.4
ENSG00000237749	AL034379.1	243.2	288.8	243.4	270.1	245.8	222.7	151.4	204.9	201.7	167.3	132.6	161	235.7	300.2	116	157.5	56.6	86.2	147.6	185.1	245.6	15.1	43.7	201.5	798	132.2	208.6	31.6	49.9	172	245.2	210.9	53.8	122.3	0	0	5119.2	80.5
ENSG00000163879	DNALI1	0	0	0	0	0	0	25.2	4.5	9.1	6.2	5.1	15.9	0	4.1	0	0	0	0	0	0	0	0	0	0	0	0	0	0	0	11.5	0	0	0	0	0	0	0	0
ENSG00000134697	GNL2	6.8	23.4	19.2	27.3	68.7	44.5	62.4	73.3	58.2	57.8	44.6	56.7	0	0	0	0	64.8	0	105.7	0	0	0	10.9	147.1	0	3.8	64.1	0	8.6	38.4	175.2	6.3	0	0	0	0	0	40.3
ENSG00000169218	RSPO1	0	0	0	0	0	0	4	0	0	0	0	0	0	0	0	49.6	0	0	0	0	0	0	10.9	0	0	0	0	0	0	0	0	0	0	0	0	0	0	0
ENSG00000116922	C1orf109	0	6.6	6.4	14	0.7	13.9	13.3	17.9	23.3	29.4	19.1	19.3	0	0	0	0	0	0	30.8	0	0	0	0	0	0	0	0	0	17.8	15.9	100.3	2.6	0	0	0	0	0	0
ENSG00000134690	CDCA8	0	4.4	9.9	12.7	23.1	5.1	21.3	28.4	16.8	19.6	14	5.7	0	0	0	33.5	0	0	0	0	0	0	0	0	0	0	0	0	0	5.7	0	0.4	0	0	4786	0	0	0
ENSG00000183317	EPHA10	0	0	0	0	0	0	0	0	0	2.7	1.3	2.3	0	0	0	0	0	0	0	0	0	0	0	0	0	0	0	0	0	0	0	0.4	0	0	0	0	0	0
ENSG00000200421	Y_RNA	0	0	0	0	0	0	1.3	0	0	0	0	0	0	0	0	0	0	0	0	0	0	0	0	0	0	0	0	0	0	0	0	0	0	0	0	0	0	0
ENSG00000185090	MANEAL	0	0	0.7	4.7	0	0	4	3	10.3	10.7	11.5	10.2	0	4.1	0	0	0	0	0	0	0	0	0	0	0	185.1	0	0	0	13.4	1.6	0	0	61.1	0	0	0	0
ENSG00000196449	YRDC	3.4	12.4	7.1	0	11.6	0	23.9	23.9	19.4	21.4	16.6	14.7	0	0	0	0	0	0	0	182.1	0	0	10.9	0	0	0	0	0	0	2.9	0	85.3	0	0	0	0	0	0
ENSG00000197982	C1orf122	39.3	39.5	50.4	24.7	32.5	10.2	59.8	71.8	116.4	100.5	53.6	112.3	57.2	16.2	133.9	287.7	214.5	0	39.7	85	204.7	0	43.7	0	0	0	12.1	0	0	58.5	0	35.2	0	0	0	0	0	40.3
ENSG00000188786	MTF1	48.8	11	35.5	24.7	14.5	0	22.6	70.3	34.9	32.9	45.9	55.6	0	4.1	0	0	3.5	0	141	0	0	0	0	5.4	0	3.8	20.8	0	0	34.8	0	80.4	0	61.1	0	0	0	0
ENSG00000204084	INPP5B	35.9	23.4	17.7	30.7	28.2	65.7	33.2	0	10.3	24	26.8	12.5	1.7	4.1	39.5	194.7	115.5	0	0	0	3.1	0	1027.7	0	75.6	0	3.5	0	4.3	42.2	109.9	50.8	0	0	0	0	0	0
ENSG00000183431	SF3A3	27.8	29.2	71	58.7	37.6	21.9	108.9	80.8	73.7	87.2	67.6	63.5	240.9	0	23.9	78.1	57.8	0	0	227.6	0	0	0	0	0	7.6	110.8	0	27.1	42.2	0	127.9	0	0	0	0	0	0
ENSG00000183386	FHL3	0	5.1	0.7	11.3	0	1.5	1.3	12	7.8	3.6	7.7	5.7	0	0	0	0	0	0	55.1	0	0	0	0	0	0	0	0	0	0	9	0	0	0	0	0	0	0	40.3
ENSG00000183520	UTP11	4.1	55.6	20.6	30.7	10.8	36.5	23.9	25.4	41.4	39.1	39.5	34	0	0	87.3	0	0	0	0	3	0	0	295.2	0	204.3	0	1.7	0	79.8	48.5	0	26	0	0	0	64.4	0	0
ENSG00000185668	POU3F1	0	0	0	0	0	0	0	0	2.6	0	0	0	0	0	0	1.2	0	0	0	0	0	0	0	0	0	0	0	0	0	0	0	0	0	0	0	0	0	0
ENSG00000284623	AL139158.3	0	0	0	0	0	0	0	0	0	0	0	0	0	0	0	0	0	0	0	0	0	0	0	0	0	0	0	0	0	0.2	0	0	0	0	0	0	0	0
ENSG00000215895	AL354702.1	21.7	7.3	22.7	20.7	41.9	67.9	19.9	15	42.7	38.3	58.7	31.8	0	4.1	3.6	117.8	17.7	0	0	0	0	0	10.9	5.4	114.2	0	45.9	0	24.2	13.2	89.2	64.5	0	61.1	0	0	0	0
ENSG00000116954	RRAGC	25.7	19	20.6	54.7	38.3	29.2	21.3	29.9	9.1	23.1	26.8	28.4	0	0	0	0	0	0	0	0	0	0	0	0	0	0	54.5	137.1	0	13	0	18.9	0	61.1	0	0	0	0
ENSG00000228436	AL139260.1	0	0	0	9.3	0	0	10.6	3	0	0	0	0	0	0	0	0	0	0	0	0	0	0	0	0	0	0	0	0	0	0	0	0	0	0	0	0	0	0
ENSG00000214114	MYCBP	6.1	9.5	7.8	21.3	44.8	13.9	47.8	29.9	85.3	74.7	66.3	99.8	1.7	4.1	0	59.5	0	0	0	0	0	0	0	59.9	66	468.3	139.4	0	2.9	64.6	0	17.8	0	0	0	0	0	80.5
ENSG00000158315	RHBDL2	0	0	0	1.3	0	0	4	4.5	16.8	17.8	2.6	29.5	0	0	0	78.1	0	0	0	0	0	0	0	0	0	0	0	0	0	19.1	0	25.6	0	0	0	0	0	0
ENSG00000199963	RNU6-605P	0	0	0	0	2.2	0	0	0	0	2.7	0	0	0	0	0	0	0	0	0	0	0	0	0	0	0	0	0	0	0	0	0	0	0	0	0	0	0	0
ENSG00000235549	EIF1P2	1.4	0	0	1.3	0	2.9	0	1.5	0	0	0	0	0	0	0	2.5	0	0	0	0	0	0	0	5.4	0	0	0.9	0	0	0.6	0	0.7	0	0	0	0	0	0
ENSG00000174574	AKIRIN1	47.4	37.3	42.6	78	49.2	26.3	103.6	37.4	112.5	55.2	98.2	30.6	10.4	215	1.2	27.3	148.5	3.6	57.3	145.7	359	10.1	10.9	0	112.6	15.1	41.5	110.7	106.9	77.4	176.7	109	0	0	0	0	0	40.3
ENSG00000168653	NDUFS5	77.9	50.4	67.4	123.4	86.7	103	151.4	112.2	112.5	138.8	108.4	88.5	1.7	12.2	167.4	1.2	0	222.8	182.9	346	6.3	0	76.5	5.4	40.2	302.1	208.6	363.8	245.8	129.6	105.1	64.5	0	0	0	0	60.2	0
ENSG00000127603	MACF1	124.7	213.5	141.9	238	135.2	177.5	200.6	187	236.6	202.8	205.3	214.4	71.1	12.2	49	176.1	439.7	0	339.3	69.8	3.1	106	10.9	114.4	318.5	30.2	425.9	337.5	39.2	150	172	416.7	161.5	0	0	64.4	60.2	201.4
ENSG00000270040	AL356055.1	0	0.7	0	0	12.3	0	0	0	1.3	0	0	0	0	0	0	0	0	0	0	0	0	0	0	0	0	0	0	0	0	0	0	0	0	0	0	0	0	0
ENSG00000217897	HSPE1P8	0	0	0	0	0	0	0	0	0	0	0	0	0	0	0	0	0	0	0	0	0	0	0	0	0	0	0	0	0	0	0	0.4	0	0	0	0	0	0
ENSG00000237624	OXCT2P1	0	0	0	0.7	0	0	0	0	0	0	1.3	0	0	0	0	0	0	0	0	0	0	0	0	0	0	0	0	0	0	0	0	0	0	0	0	0	0	0
ENSG00000182109	AL365277.1	27.8	19.7	17.7	8	21	17.5	25.2	10.5	31	32.9	15.3	34	0	0	0	48.4	0	0	39.7	166.9	3.1	0	21.9	0	0	3.8	0	0	29.9	14.9	11.1	11.1	0	61.1	0	0	0	0
ENSG00000090621	PABPC4	178.9	217.1	182.4	212	157.6	178.2	281.6	218.4	289.6	263.3	316.2	280.1	112.7	150.1	44.2	282.7	174.5	0	257.8	327.8	122.8	479.7	142.1	239.7	225.2	18.9	121.2	0	210.2	276.3	248.4	174.2	0	122.3	0	0	240.9	402.7
ENSG00000163909	HEYL	5.4	8	2.8	6	0	0	13.3	0	2.6	0.9	2.6	1.1	0	0	0	0	0	0	0	0	0	0	0	0	0	0	0	0	0	0	0	0	0	0	0	0	0	0
ENSG00000116983	HPCAL4	0	0	0	0	0	0	0	0	0	0	2.6	0	0	0	0	0	0	0	0	0	0	0	0	0	0	0	0	0	0	0	0	0	0	0	0	0	0	0
ENSG00000084072	PPIE	22.4	24.9	14.9	20.7	16.6	14.6	34.5	107.7	40.1	58.7	33.2	64.6	102.3	56.8	29.9	2.5	0	0	0	0	3.1	0	0	0	0	0	11.3	105.5	0	32.7	62.1	107.1	0	0	0	0	0	0
ENSG00000225333	AL035404.1	0	2.9	4.3	16	0	0	6.6	25.4	0	2.7	6.4	11.3	1.7	0	0	0	0	0	70.5	0	0	0	0	0	0	0	0	0	0	0.6	0	0	53.8	0	0	0	0	0
ENSG00000116985	BMP8B	0	0	0	5.3	0	0	0	0	2.6	4.4	6.4	17	0	0	0	0	0	0	0	0	0	0	0	0	0	0	0	0	0	0	0	0	0	0	0	0	0	0
ENSG00000198754	OXCT2	0	0.7	0	0	0	0	0	0	0	0	0	0	0	0	0	0	0	0	0	0	0	0	0	0	0	0	0	0	0	0	0	0	0	0	0	0	0	0
ENSG00000261798	AL033527.3	0	0	0	0	0	0	0	0	0	0.9	0	0	0	0	0	0	0	0	0	0	0	0	0	0	0	0	0	0	0	0	0	0	0	0	0	0	0	0
ENSG00000043514	TRIT1	3.4	2.9	23.4	4.7	2.9	0.7	26.6	23.9	24.6	13.3	28.1	18.1	0	0	50.2	0	0	0	0	355.1	0	0	32.8	0	27.4	22.7	0	0	0	4	62.1	23.7	0	61.1	0	0	0	0
ENSG00000202222	Y_RNA	0	0	0	0	0	0	2.7	0	3.9	4.4	2.6	0	0	4.1	0	0	0	0	0	0	0	0	0	0	0	0	0	0	0	4.8	0	0	0	0	0	0	0	0
ENSG00000116990	MYCL	3.4	0.7	5	0.7	0	0	13.3	0	12.9	3.6	6.4	5.7	0	0	0	0	0	0	0	0	0	0	0	0	0	0	0	0	0	7.3	0	8.9	0	0	0	0	0	0
ENSG00000207356	Y_RNA	0	0	0	0	0	0	0	0	0	0	1.3	0	0	0	0	0	0	0	0	0	0	0	0	0	0	0	0	0	0	0	0	0	0	0	0	0	0	0
ENSG00000168389	MFSD2A	0.7	11	14.2	10.7	0	67.9	123.5	70.3	95.7	19.6	85.4	56.7	0	12.2	0	0	0	0	0	0	0	0	492	0	11.3	0	87.4	0	0	48	0	16.7	0	0	0	0	0	40.3
ENSG00000228477	AL663070.1	0.7	0	0	0	0	0	1.3	0	1.3	0	0	0	0	0	0	0	0	7.2	0	0	0	0	0	0	0	0	0	0	0	0.2	0	0.4	0	0	0	0	0	0
ENSG00000131236	CAP1	669.3	573.9	528.7	565.4	547.2	585.7	1147.7	1050	1042.1	963.5	835.2	928.9	31.2	859.9	322.8	482.3	381.9	330.6	334.9	336.9	497.6	0	1246.3	844.3	542.2	883.8	468.3	701.3	153.2	841	281.8	828.2	0	244.6	67.4	64.4	0	362.5
ENSG00000131238	PPT1	610.4	507.4	487.5	507.4	486.5	379	1355	1563.1	1291.6	887.9	1049.5	1048	128.3	442.1	203.3	131.4	337.1	506.6	279.8	221.5	491.3	40.4	1060.5	81.7	973.3	1541	446.6	253.1	156.1	1101.1	625.8	570.2	0	61.1	134.8	322	180.7	402.7
ENSG00000226745	AL512599.1	0	0	0	0	0	0	4	0	0	0	0	0	0	0	0	0	0	0	0	0	0	0	0	0	0	0	0	0	0	10.7	0	0	0	0	0	0	0	0
ENSG00000117000	RLF	4.1	31.4	28.4	20	4.3	30.7	31.9	100.2	50.4	28.5	40.8	49.9	0	0	0	0	102.6	0	0	0	50.4	0	0	0	114.2	3.8	84.8	0	44.2	73.2	0	23.7	0	0	0	0	0	0
ENSG00000207508	RNU6-1237P	0	0	0	6	0	0	0	0	0	5.3	0	0	0	0	0	0	0	0	0	0	0	0	0	0	0	0	0	0	0	0	0	0	0	0	0	0	0	0
ENSG00000259943	AL050341.2	0	0	0	0	0	16.8	6.6	4.5	9.1	6.2	5.1	6.8	0	0	0	0	0	0	0	0	0	0	0	0	0	0	0	0	0	0	0	0	0	0	0	0	0	0
ENSG00000084073	ZMPSTE24	51.5	46.8	82.3	54	70.1	102.2	225.8	110.7	248.2	194.8	205.3	183.7	6.9	20.3	0	0	178	0	101.3	0	0	0	0	0	0	3.8	90.9	131.8	0	206.2	1.6	239.9	0	0	0	64.4	0	40.3
ENSG00000049089	COL9A2	4.7	5.8	0	18	8	0.7	152.8	89.7	122.8	57.8	103.3	69.2	0	8.1	0	0	0	0	0	0	0	0	10.9	0	56.3	7.6	0	0	0	69.2	0	28.2	0	61.1	0	0	0	0
ENSG00000227311	AL031985.2	0	0	0.7	0	0	0	0	0	0	0	0	1.1	0	0	3.6	0	0	3.6	0	0	0	0	0	0	0	0	0.9	0	2.1	0	0	1.5	0	0	0	193.2	0	0
ENSG00000084070	SMAP2	113.1	23.4	115	90	67.9	72.3	95.6	127.1	104.7	71.2	119.9	87.3	0	4.1	297.7	12.4	38.9	621.6	4.4	0	31.5	10.1	10.9	0	318.5	173.7	134.2	0	104.7	52.4	86	150.1	53.8	61.1	0	64.4	0	161.1
ENSG00000213172	AL031985.1	0	0	0	0	0	0	0	0	0	1.8	0	4.5	0	4.1	0	0	0	0	4.4	0	0	0	0	0	0	0	14.7	137.1	0	0.2	0	0	0	0	0	0	0	0
ENSG00000284677	AL031985.4	0	0	0	0	0	0	1.3	0	0	0	0	0	0	0	0	0	0	0	0	0	0	0	0	0	0	0	0	0	0	0	0	0	0	0	0	0	0	0
ENSG00000187801	ZFP69B	1.4	0	0	0	0	0	0	0	0	3.6	0	0	0	0	0	0	0	0	0	0	0	0	0	0	0	0	0	0	7.8	0	0	0	0	0	0	0	0	0
ENSG00000260920	AL031985.3	0	5.1	2.1	8	0	0	12	0	5.2	8.9	2.6	0	0	0	0	0	0	0	0	0	0	0	0	0	0	0	0	0	0	0	0	0	0	0	0	0	0	0
ENSG00000187815	ZFP69	6.8	0	0.7	0	0	0	6.6	1.5	9.1	4.4	2.6	3.4	0	0	0	0	0	0	0	0	0	0	0	0	0	0	0	0	0	9.9	0	0	0	0	0	0	0	0
ENSG00000164002	EXO5	0	21.9	0.7	6	0	8.8	6.6	25.4	5.2	10.7	11.5	3.4	0	0	0	0	23.6	0	0	0	0	0	0	0	0	3.8	0	0	0	13	0	17.1	0	0	0	0	60.2	0
ENSG00000117010	ZNF684	5.4	2.2	5.7	6.7	0	11	2.7	9	5.2	8.9	17.9	4.5	1.7	0	55	0	0	0	308.4	0	0	5	0	0	59.5	0	64.1	0	0.7	15.3	0	0	0	0	67.4	0	0	40.3
ENSG00000117016	RIMS3	0	2.9	3.5	2	0.7	0	2.7	1.5	1.3	4.4	1.3	6.8	0	4.1	0	1.2	0	0	0	0	126	0	0	0	1.6	0	5.2	0	0	18	3.2	0.7	0	0	0	0	0	0
ENSG00000272145	NFYC-AS1	0	0	0	0	0	0.7	0	0	0	0	0	0	0	0	0	0	0	0	0	0	0	0	0	0	0	0	0	0	0	0	0	0	0	0	0	0	0	0
ENSG00000066136	NFYC	16.9	13.9	28.4	21.3	47	56.2	26.6	29.9	44	22.2	39.5	36.3	0	158.2	0	107.9	0	0	22	0	15.7	5	21.9	179.8	33.8	0	13.8	0	32.1	25.6	0	0.4	0	0	0	0	0	0
ENSG00000117013	KCNQ4	0	0	0	0	0	0	0	0	6.5	2.7	6.4	0	0	0	0	0	0	0	0	0	0	0	0	0	0	0	0	0	0	0	0	0	0	0	0	0	0	0
ENSG00000179862	CITED4	0	3.7	7.1	6.7	0	0	9.3	22.4	9.1	16	15.3	36.3	0	4.1	0	0	67.2	14.4	0	3	0	0	0	0	0	290.8	0	0	71.3	20.8	0	33.7	0	0	0	0	0	0
ENSG00000171793	CTPS1	0	0	0	5.3	8	0	6.6	0	38.8	17.8	14	11.3	0	0	0	76.9	0	0	0	0	0	0	0	0	1.6	0	0	311.1	0.7	10.9	0	0	0	0	0	0	0	0
ENSG00000281207	SLFNL1-AS1	0	0	0	0	0	0	0	0	1.3	0	0	0	0	0	0	0	0	0	0	0	0	0	0	0	0	0	0	0	0	0	0	0	0	0	0	0	0	0
ENSG00000171790	SLFNL1	0	0	0	0	0	0	1.3	0	0	0.9	0	0	0	0	0	0	0	0	0	0	0	0	0	0	0	0	0	0	0	0	0	0	0	0	0	0	0	0
ENSG00000010803	SCMH1	0	9.5	1.4	1.3	3.6	6.6	39.9	1.5	5.2	8	16.6	39.7	369.2	4.1	0	0	147.3	0	0	0	289.7	0	0	0	0	3.8	0.9	0	0	28.9	9.6	34.1	0	0	0	0	0	0
ENSG00000215893	RPL23AP17	0	0	0	0.7	0	0	0	0	0	0	0	0	0	0	0	0	0	0	0	0	0	0	0	0	0	0	0	0	0	0	0	0	0	0	0	0	0	0
ENSG00000235358	AC093151.3	0	0	0	0	0	0	0	0	0	0	0	6.8	0	0	0	0	0	0	17.6	0	0	0	0	0	0	0	0	0	0	5.7	0	0	0	0	0	0	0	0
ENSG00000204060	FOXO6	10.2	0	0	4.7	0.7	0	51.8	56.8	40.1	56.9	61.2	28.4	3.5	4.1	0	0	0	0	2.2	0	0	0	10.9	0	0	0	0	0	0	33.8	0	17.8	0	0	0	0	0	40.3
ENSG00000229901	AC093151.2	0	0	0	0	0	0	4	0	0	1.8	2.6	0	0	0	0	0	0	0	0	0	0	0	0	0	0	0	0	0	0	1.7	0	0	0	0	0	0	0	0
ENSG00000127129	EDN2	0	0	0	0	0	0	1.3	1.5	5.2	9.8	2.6	2.3	0	0	0	0	0	0	0	0	0	0	0	0	0	0	0	0	0	0	0	0	0	0	0	0	0	0
ENSG00000127124	HIVEP3	42.7	23.4	2.1	7.3	21	0	5.3	25.4	12.9	15.1	10.2	7.9	1.7	0	0	0	0	0	55.1	3	651.9	318.1	0	0	1.6	0	39	0	13.5	0.4	0	0	0	0	0	0	0	40.3
ENSG00000230638	AL445933.1	0	0	0	0	0	0	0	1.5	0	0	0	0	0	0	0	0	0	0	0	0	0	0	0	0	0	0	0	0	0	0	0	0	0	0	0	0	0	0
ENSG00000227538	HNRNPFP1	0	0	0.7	0	0	0	0	0	0	0	0	1.1	0	0	0	0	0	0	0	0	0	0	0	0	0	0	0	0	0	0	0	3.7	0	0	0	0	0	0
ENSG00000198815	FOXJ3	19	20.5	25.5	28.7	23.1	23.4	43.8	61.3	54.3	49.8	40.8	37.4	1.7	0	137.5	126.5	0	0	74.9	0	100.8	5	0	0	72.4	90.6	31.2	0	0	48	0	153.1	0	0	0	0	0	40.3
ENSG00000177181	RIMKLA	0	0	0	0	0	0	4	0	0	0	0	0	0	0	0	0	0	0	0	0	0	0	0	0	0	0	0	0	0	0	0	0	0	0	0	0	0	0
ENSG00000066185	ZMYND12	0.7	0.7	9.9	0.7	0	0	12	9	10.3	12.5	12.8	7.9	0	0	0	0	0	0	0	0	0	0	10.9	0	0	0	0	0	0	7.6	0	0	0	0	0	0	0	0
ENSG00000127125	PPCS	134.8	186.4	151.2	177.4	103.4	176	490.2	595.3	518.5	441.3	527.9	392.4	1.7	28.4	113.6	67	112	226.4	0	6.1	170.1	15.1	535.7	0	418.3	11.3	237.2	126.6	131.1	409.3	84.4	133.8	107.7	917.2	0	64.4	0	80.5
ENSG00000186409	CCDC30	0	4.4	5.7	0	0	0	42.5	25.4	22	24	25.5	18.1	0	4.1	0	0	0	0	0	0	0	0	0	0	0	0	0	0	57	11.1	0	59.7	0	0	0	0	0	0
ENSG00000230116	AL445669.1	0	0	0	0	0	0	0	0	0	0	0	0	0	0	0	0	0	0	0	0	0	0	0	0	1.6	0	0	0	0	0	0	0	0	0	0	0	0	0
ENSG00000236876	TMSB4XP1	33.9	62.9	34.1	57.3	62.2	39.4	51.8	50.9	29.7	18.7	122.4	34	58.9	4.1	82.5	174.8	202.7	0	178.4	100.2	47.2	5	21.9	190.7	107.8	0	44.1	5.3	0	46.4	98.7	72.7	0	0	2763.7	0	0	0
ENSG00000236180	AL445669.2	0	0	0	0	0	0	1.3	0	0	0	0	0	0	0	0	0	0	0	0	0	0	0	0	0	0	0	0	0	0	0	0	0	0	0	0	0	0	0
ENSG00000171960	PPIH	2.7	25.6	39.7	43.3	32.5	62.8	77	70.3	131.9	89.9	119.9	55.6	17.3	4.1	0	0	20	132.9	154.2	0	0	0	0	0	0	3.8	0.9	0	55.6	138.7	221.3	112.7	0	0	0	0	0	0
ENSG00000234917	AC098484.2	12.2	0	0	0	0	0	5.3	3	7.8	3.6	3.8	0	0	0	0	0	0	0	0	0	0	0	0	0	0	0	0	0	0	0	0	0	0	0	0	0	0	0
ENSG00000065978	YBX1	96.9	133.1	119.9	103.4	114.9	64.3	66.4	68.8	62.1	59.6	56.1	63.5	161.2	494.9	145.9	161.2	188.6	280.3	138.8	0	6.3	0	10.9	0	49.9	11.3	147.1	105.5	51.3	84.1	20.7	18.2	0	0	67.4	64.4	0	40.3
ENSG00000164007	CLDN19	0	0	0	0	0	0	0	0	1.3	0	0	0	0	0	0	0	0	0	0	0	0	0	0	0	0	0	0	0	0	0	0	0	0	0	0	0	0	0
ENSG00000117385	P3H1	10.2	48.3	63.2	23.3	15.9	11.7	15.9	20.9	25.9	32	14	14.7	3.5	0	142.3	36	1.2	43.1	0	0	18.9	0	0	0	3.2	3.8	14.7	0	119.7	8.6	101.9	79.7	0	0	0	0	0	0
ENSG00000164008	C1orf50	0	0	0	2.7	0	0	0	0	5.2	0	0	4.5	0	1022.2	0	9.9	0	0	0	0	0	0	0	0	0	0	0	0	0	0	1.6	11.5	0	0	0	0	0	0
ENSG00000274386	TMEM269	0	0	0	0	0	0	0	0	0	4.4	0	0	0	0	0	0	0	0	0	0	0	0	0	0	0	0	0	0	0	0	0	0	0	0	0	0	0	0
ENSG00000177868	SVBP	0	11.7	9.2	23.3	25.3	13.1	12	15	24.6	2.7	15.3	18.1	0	0	0	32.2	0	0	0	0	0	0	0	0	0	0	0	179.3	7.8	0	141.7	0	0	0	0	0	0	0
ENSG00000164010	ERMAP	31.2	24.1	44.7	46.7	26.7	10.2	12	35.9	34.9	26.7	14	44.2	0	0	0	0	0	0	0	0	0	0	0	0	0	0	19.9	0	42.8	16.6	0	0	0	0	0	0	0	0
ENSG00000164011	ZNF691	1.4	0	8.5	0	0.7	0	6.6	6	1.3	5.3	1.3	6.8	0	0	0	0	0	0	0	0	0	0	0	0	70.8	56.7	0	0	0	11.7	0	0	0	0	0	0	0	0
ENSG00000233708	AL512353.2	0	0	0	0	0	0	0	0	0	0	1.3	0	0	0	0	0	0	0	0	0	0	0	0	0	0	0	0	0	0	0	0	0	0	0	0	0	0	0
ENSG00000225099	ATP6V1E1P1	4.1	0.7	2.8	6	0.7	6.6	4	0	2.6	7.1	10.2	11.3	0	0	0	0	0	0	0	0	0	0	0	0	0	0	0	0	0	0.2	0	3.3	0	0	0	0	0	0
ENSG00000117394	SLC2A1	216.1	201.1	247	190.7	171.3	222	338.7	299.2	323.2	230.4	428.5	293.7	147.3	28.4	223.6	136.4	99	32.3	4.4	109.3	163.8	303	21.9	125.3	77.2	226.6	122.9	0	54.2	385.8	121	336.6	0	61.1	67.4	0	120.5	161.1
ENSG00000227533	SLC2A1-AS1	0	4.4	0	0	0	0	0	15	10.3	1.8	6.4	0	0	0	0	0	0	0	0	0	0	0	0	0	0	0	0	0	56.3	19.3	0	0	0	0	0	0	0	0
ENSG00000117395	EBNA1BP2	32.5	38.8	47.5	26	2.2	57	144.8	145.1	125.4	122.8	145.4	129.3	65.9	511.1	65.8	16.1	216.9	0	2.2	0	0	0	0	0	77.2	3.8	65.8	0	20	161.3	114.6	130.5	0	0	67.4	0	0	0
ENSG00000243710	CFAP57	6.1	0	0.7	2.7	18.8	0	1.3	0	6.5	3.6	3.8	5.7	0	0	0	0	0	0	0	0	0	0	0	54.5	0	0	0	0	0	8.6	0	0	0	0	0	0	0	40.3
ENSG00000179178	TMEM125	0	0	0	0	0	0	27.9	13.5	22	16.9	33.2	34	0	4.1	0	0	0	0	0	0	0	0	0	0	128.7	0	0	0	0	19.1	9.6	1.1	0	0	0	0	0	0
ENSG00000253313	C1orf210	0	0	0	0	0	0	17.3	35.9	23.3	23.1	12.8	19.3	0	4.1	0	1.2	0	0	0	0	0	0	0	0	0	0	0	0	0	45.5	0	8.9	0	0	0	0	0	0
ENSG00000066056	TIE1	11.5	9.5	21.3	8	22.4	5.8	13.3	0	1.3	3.6	0	0	0	0	69.4	0	0	0	15.4	133.5	0	0	0	0	0	3.8	38.1	189.8	54.9	0.4	0	0	0	0	0	0	0	0
ENSG00000234694	AL139289.2	0.7	0	0	0	0	0	2.7	0	0	0.9	3.8	0	0	0	0	0	0	0	0	0	0	0	0	0	0	0	0	0	42	0	0	0	0	0	0	0	0	0
ENSG00000117399	CDC20	0	0	0	0.7	0	0	0	0	5.2	0	0	0	0	0	0	0	0	0	0	0	0	0	0	0	0	0	0	0	0	0	0	11.1	0	0	0	0	0	0
ENSG00000066322	ELOVL1	1.4	14.6	29.1	18.7	22.4	55.5	62.4	62.8	56.9	43.6	53.6	54.4	5.2	0	203.3	5	0	0	13.2	3	0	0	10.9	0	8	147.3	15.6	0	49.2	49.7	0	84.5	0	0	0	64.4	0	0
ENSG00000159479	MED8	27.8	63.6	53.9	46.7	78.1	48.2	104.9	137.6	108.6	62.3	85.4	113.4	34.7	44.6	62.2	0	147.3	0	30.8	0	0	0	0	0	77.2	3.8	77	284.7	0	120.4	0	28.9	0	61.1	0	0	60.2	0
ENSG00000198198	SZT2	0	8.8	7.8	9.3	31.1	8	10.6	9	7.8	11.6	10.2	10.2	0	0	58.6	0	0	0	101.3	0	0	0	0	0	0	0	1.7	0	0	14.1	0	4.1	0	0	0	0	0	40.3
ENSG00000229372	SZT2-AS1	0	0	0	0	0	0	0	0	0	9.8	0	1.1	0	0	0	0	0	0	0	0	0	0	0	0	0	0	0	0	0	1.3	0	0	0	0	0	0	0	0
ENSG00000178922	HYI	9.5	24.9	14.2	17.3	13	1.5	34.5	25.4	40.1	42.7	33.2	47.6	29.5	0	0	54.6	40.1	3.6	2.2	0	0	0	0	0	1.6	7.6	35.5	0	69.1	27.7	0	59.3	0	0	0	0	0	0
ENSG00000142949	PTPRF	111.1	79	100.1	52.7	127.2	76.7	1709.6	1920.5	1855.3	2256.2	1777.6	1997.2	291.2	531.4	454.4	2.5	655.4	226.4	6.6	12.1	15.7	10.1	1880.4	626.4	952.4	1828	380	464	218.8	1613.8	264.3	1891.9	215.3	122.3	0	128.8	11683.9	322.2
ENSG00000066135	KDM4A	50.8	64.3	27	36.7	7.2	37.2	42.5	20.9	31	73	81.6	57.8	24.3	4.1	67	0	161.5	0	85.9	0	0	0	0	158	0	0	0.9	0	77.7	72.6	0	9.3	0	61.1	134.8	128.8	120.5	40.3
ENSG00000236200	KDM4A-AS1	0	0	0	0	0	0	0	0	0	0	0	0	0	4.1	0	0	0	0	0	0	0	0	0	0	0	3.8	7.8	0	0	4.2	0	0	0	0	0	0	0	0
ENSG00000126091	ST3GAL3	0.7	0	0	6.7	4.3	0.7	10.6	0	6.5	4.4	6.4	19.3	1.7	0	0	1.2	0	0	0	0	0	0	0	0	0	0	0	0	0	16.2	0	17.1	0	0	0	0	0	0
ENSG00000229444	AL451062.1	0	0	0	0	0	0	0	0	0	0	1.3	0	0	0	0	0	0	0	0	0	0	0	0	0	0	0	0	0	0	0	0	0	0	0	0	0	0	0
ENSG00000117407	ARTN	0	0	0	0	0	0	1.3	9	0	1.8	3.8	9.1	0	0	0	0	0	0	0	0	0	0	0	0	0	0	0	0	0	0	0	0	0	0	0	0	0	0
ENSG00000117408	IPO13	6.1	32.2	15.6	11.3	9.4	2.9	21.3	15	20.7	12.5	16.6	31.8	0	0	0	0	4.7	0	0	0	0	0	0	0	0	0	42.4	0	3.6	15.3	8	47.8	0	0	0	0	0	0
ENSG00000132768	DPH2	5.4	21.9	6.4	7.3	8	0.7	47.8	44.9	63.4	28.5	33.2	52.2	3.5	4.1	68.2	0	1.2	82.6	0	0	0	10.1	0	0	61.1	3.8	60.6	0	0	65.9	0	0	0	0	0	0	0	40.3
ENSG00000117410	ATP6V0B	86	112.6	98.6	63.3	117.8	38	160.7	187	221.1	190.4	272.9	150.8	3.5	4.1	203.3	81.8	99	0	0	0	88.2	0	0	108.9	177	3.8	365.3	442.9	114.7	148.5	100.3	251.4	0	61.1	0	0	0	201.4
ENSG00000117411	B4GALT2	11.5	49.7	48.3	31.3	52	30.7	110.3	116.7	138.3	84.5	131.3	82.8	3.5	121.7	0	0	143.8	0	171.8	39.5	3.1	5	0	5.4	143.2	287	51.1	0	86.2	135.1	243.6	117.9	53.8	0	0	0	0	0
ENSG00000159214	CCDC24	0.7	4.4	12.8	2	14.5	0	35.9	71.8	37.5	56.9	62.5	45.4	0	4.1	65.8	0	148.5	0	59.5	0	0	0	0	0	167.3	0	58.9	0	0.7	55.6	0	34.5	0	0	0	64.4	0	0
ENSG00000196517	SLC6A9	0	9.5	2.8	10.7	0	0	203.2	76.3	146.1	124.6	169.6	107.7	0	16.2	0	0	0	0	50.7	0	0	0	0	0	12.9	11.3	0.9	0	0	85.4	0	90.8	0	0	0	0	0	0
ENSG00000230615	AL139220.2	0.7	0	14.9	2	0.7	0	9.3	1.5	10.3	15.1	2.6	15.9	0	0	0	0	22.4	0	0	0	0	0	0	0	0	0	0	0	0	2.1	0	1.1	0	0	0	0	60.2	0
ENSG00000227163	AL139220.1	0	0	0	0	0	0	0	1.5	0	0	0	3.4	0	0	0	0	0	0	0	0	0	0	0	0	0	0	0	0	0	0.6	0	0	0	0	0	0	60.2	0
ENSG00000271647	KRT8P47	0	0	0	0	0	0	0	0	0	0	0	0	0	0	0	0	0	0	0	0	0	0	0	0	0	0	0	0	0	0	9.6	0	0	0	0	0	0	0
ENSG00000239560	RN7SL479P	0	0	0	0	0	0	0	0	0	0	0	0	0	0	0	0	0	0	0	0	0	0	0	0	0	0	0	0	0	0	0	1.5	0	0	0	0	0	0
ENSG00000171872	KLF17	0	0.7	0	0	0	0	0	6	1.3	0	0	0	1.7	0	0	0	0	0	0	0	0	0	0	0	0	0	0	0	0	0	0	0.4	0	0	0	0	0	0
ENSG00000233514	AL356653.1	0	0	0	0	0	0	1.3	0	3.9	0.9	2.6	4.5	0	0	0	0	0	0	0	0	9.4	0	0	43.6	0	0	0	0	0	10.9	0	8.9	0	0	0	0	0	0
ENSG00000178028	DMAP1	0	0	0	0.7	0	0	0	0	0	0	0	0	0	0	0	0	0	0	0	0	3.1	0	0	0	0	0	0	0	0	0	0	0	0	0	0	0	0	0
ENSG00000117419	ERI3	0	0	2.8	0	0	0	1.3	9	5.2	0.9	0	5.7	294.7	0	0	0	0	0	0	0	0	0	0	0	0	0	3.5	5.3	0	8	0	1.9	0	0	0	64.4	0	0
ENSG00000187147	RNF220	71.8	59.2	95.8	69.3	36.9	56.2	79.7	65.8	73.7	74.7	94.4	69.2	1.7	0	0	81.8	91.9	0	242.3	0	22	0	10.9	5.4	273.5	11.3	48.5	0	0.7	82.4	97.1	48.6	0	0	0	0	0	80.5
ENSG00000126106	TMEM53	0	0.7	8.5	0.7	17.3	0	19.9	20.9	12.9	9.8	15.3	6.8	0	4.1	0	0	0	0	0	0	0	0	0	0	0	192.6	0.9	10.5	0	21.6	51	0	0	0	0	0	0	0
ENSG00000198520	C1orf228	0	0	0	0	0	0	0	4.5	0	5.3	0	1.1	0	4.1	0	0	0	115	2.2	0	0	0	0	0	0	0	0	0	0	0	0	0	0	0	0	0	0	0
ENSG00000142945	KIF2C	2	0	6.4	1.3	2.2	0	22.6	55.3	40.1	13.3	35.7	38.6	0	0	0	0	0	0	0	0	0	0	0	0	0	7.6	0	0	0	28.9	0	13.3	0	0	0	0	60.2	0
ENSG00000225721	AL592166.1	0	0	0	0	0	0	0	0	1.3	0	0	0	0	0	0	0	0	0	0	0	0	0	0	0	0	0	0	0	0	0	0	0	0	0	0	0	0	0
ENSG00000142937	RPS8	19.6	27.1	20.6	17.3	23.1	36.5	21.3	12	23.3	16	23	14.7	0	0	28.7	6.2	18.9	0	6.6	3	113.4	5	0	0	6.4	3.8	34.6	168.7	24.9	19.5	19.1	34.5	3499	61.1	0	386.3	0	0
ENSG00000202031	SNORD38A	0	2.9	0	0	0	0	0	0	0	0	0	0	0	0	0	0	0	0	0	0	0	0	0	0	0	0	0	0	0	0	0	0	0	0	0	0	0	0
ENSG00000234093	RPS15AP11	1.4	4.4	5	5.3	5.1	0	10.6	3	5.2	4.4	1.3	7.9	0	0	2.4	5	1.2	0	2.2	0	0	0	0	0	4.8	0	3.5	5.3	7.1	4	6.4	3.7	0	0	0	0	0	40.3
ENSG00000142959	BEST4	0	0	0	0	0	0	0	6	2.6	0	2.6	0	0	0	0	0	0	0	0	0	0	0	0	0	0	0	0	0	0	4	0	0	0	0	0	0	0	0
ENSG00000173846	PLK3	4.7	40.2	36.9	18	22.4	13.9	9.3	3	18.1	6.2	10.2	25	0	4.1	1.2	31	0	0	0	0	0	0	0	0	0	0	0	0	64.8	39.9	0	50.8	0	0	0	0	0	0
ENSG00000188396	TCTEX1D4	10.8	0	0.7	0	0	0	9.3	0	1.3	0	0	0	0	0	0	0	0	0	0	0	0	0	0	0	0	0	0	0	0	0	0	0	0	0	0	0	0	0
ENSG00000222009	BTBD19	31.2	8.8	22	0	0.7	17.5	8	3	2.6	10.7	5.1	0	0	4.1	0	0	0	0	0	731.4	3.1	5	10.9	0	0	3.8	12.1	5.3	3.6	6.3	14.3	1.1	0	0	0	0	0	0
ENSG00000117425	PTCH2	7.5	14.6	19.2	6	18.1	41.6	0	0	0	11.6	10.2	0	81.5	0	0	0	110.8	0	103.5	0	0	0	0	0	0	0	0	0	0	0	0	11.5	0	0	0	64.4	0	0
ENSG00000226499	AL136380.1	124.7	130.1	137.7	112	62.2	85.4	193.9	137.6	98.3	81.9	100.7	165.6	150.8	1371	246.3	1.2	188.6	10.8	4.4	349	0	0	0	528.4	453.7	815.8	129	5.3	106.9	204.1	457	196.9	53.8	61.1	0	0	60.2	40.3
ENSG00000070785	EIF2B3	8.1	15.4	17	27.3	8.7	8	35.9	7.5	44	45.4	17.9	18.1	0	0	0	0	0	0	0	124.4	0	0	0	0	0	3.8	41.5	0	0	23.3	0	26.7	0	0	0	0	0	0
ENSG00000232369	PPIAP35	0	1.5	2.8	0.7	13.7	0.7	0	0	0	0	2.6	0	0	0	0	0	0	0	0	0	0	35.3	0	0	0	0	0	0	0	0	0	0	0	0	269.6	0	0	0
ENSG00000268949	MRPS17P1	8.8	13.9	5	37.3	0	0	43.8	28.4	56.9	7.1	31.9	22.7	0	0	27.5	0	0	0	0	133.5	0	0	0	0	0	37.8	3.5	0	0	21	248.4	14.5	0	0	0	0	0	0
ENSG00000126107	HECTD3	10.2	33.6	18.5	23.3	46.3	19	49.2	62.8	42.7	40	70.1	73.7	0	8.1	39.5	0	90.8	0	0	24.3	0	0	0	0	54.7	158.6	35.5	0	15	81.6	269.1	39.3	0	0	0	0	0	0
ENSG00000126088	UROD	14.2	3.7	22.7	0	5.8	0	0	6	5.2	11.6	19.1	10.2	0	0	184.1	1.2	0	0	0	0	0	0	0	0	0	0	22.5	0	0	8.8	0	53	0	0	0	64.4	0	0
ENSG00000162415	ZSWIM5	0	2.9	0	0	0	0	0	0	0	0.9	1.3	0	0	0	0	0	0	0	79.3	0	0	0	0	0	0	0	0	0	25.7	0	215	0	0	0	0	0	0	0
ENSG00000281912	LINC01144	0	0	0	0.7	0	0	0	0	5.2	0.9	10.2	0	0	0	0	0	0	0	0	0	0	0	0	0	0	0	0	0	0	0	0	0	0	0	0	0	0	0
ENSG00000186603	HPDL	0	0	0.7	0.7	0	0	14.6	4.5	10.3	5.3	10.2	9.1	0	0	0	0	0	0	0	0	0	0	0	0	0	0	0	0	0	0	0	5.9	0	0	0	0	0	0
ENSG00000132781	MUTYH	0	0	0	0	0	0	0	0	1.3	2.7	0	2.3	0	0	0	0	0	0	0	0	0	0	174.9	0	1.6	0	0	0	0	0	0	0.4	0	0	0	0	0	0
ENSG00000132773	TOE1	34.6	14.6	7.1	14	19.5	0.7	45.2	20.9	51.7	53.4	58.7	54.4	0	4.1	1.2	44.6	0	0	0	0	0	0	0	0	0	3.8	0.9	0	33.5	52.9	0	64.1	0	0	0	64.4	0	40.3
ENSG00000070759	TESK2	12.9	18.3	7.8	14.7	5.8	0	29.2	26.9	33.6	15.1	29.3	17	0	0	0	0	0	0	0	0	0	0	0	0	0	0	0	0	0	22.4	0	45.6	0	0	0	0	0	0
ENSG00000236872	PPIAP36	0	0	5	0	0	0	0	1.5	0	0	0	0	0	0	0	0	0	0	0	0	0	5	0	0	0	0	3.5	0	0	0	0	0	0	0	0	0	0	0
ENSG00000280670	CCDC163	0	2.9	0	0.7	0	8.8	1.3	9	0	0	3.8	0	1.7	0	0	121.5	0	0	0	3	0	0	0	0	0	0	0	0	7.1	11.1	0	67.1	0	0	0	0	0	0
ENSG00000132763	MMACHC	1.4	3.7	0	0	0	0	14.6	0	10.3	14.2	16.6	15.9	0	0	0	0	7.1	0	0	0	0	0	0	0	101.4	0	0	0	0	0	0	0	0	0	0	0	0	0
ENSG00000117450	PRDX1	495.9	471.6	455.6	468.8	493.7	342.5	1147.7	1207.1	1304.6	1248.2	1109.4	1258.9	251.3	113.6	365.9	589	304.1	244.3	401	233.7	6.3	10.1	218.7	305	567.9	842.2	831.8	221.5	232.3	803.9	121	812.3	53.8	183.4	134.8	64.4	180.7	402.7
ENSG00000117448	AKR1A1	88.1	122.8	129.2	132.7	116.4	87.6	186	106.2	214.6	218.9	218.1	187.1	8.7	953.2	172.2	184.8	179.2	0	68.3	3	0	202	54.7	0	170.5	147.3	53.7	179.3	81.2	229.3	1.6	95.6	0	61.1	0	64.4	60.2	40.3
ENSG00000132780	NASP	7.5	19	29.1	28.7	4.3	1.5	38.5	25.4	24.6	29.4	47.2	34	29.5	0	0	0	304.1	0	0	0	0	0	0	0	1.6	0	60.6	0	0	74.9	1.6	9.6	0	0	0	0	0	0
ENSG00000159588	CCDC17	0	0	0	0	0	0	0	0	2.6	0	2.6	0	0	0	0	0	0	0	0	0	0	0	0	0	0	0	0	0	0	0	0	0	0	0	0	0	0	0
ENSG00000159592	GPBP1L1	231.7	201.8	179.5	162.7	106.3	123.4	585.8	620.7	499.1	332.7	460.3	475.2	8.7	174.4	196.1	298.8	227.5	7.2	451.6	15.2	37.8	267.6	21.9	103.5	468.2	698.7	202.5	137.1	230.2	456.3	234.1	346.6	0	122.3	0	0	60.2	161.1
ENSG00000225447	RPS15AP10	2.7	0	0	0	0	0	0	9	0	0	2.6	0	0	0	0	0	0	0	0	0	0	0	0	0	0	0	0	0	0	0	0	0.4	0	0	0	0	0	0
ENSG00000159596	TMEM69	3.4	16.8	22	30.7	18.8	21.9	23.9	20.9	18.1	42.7	26.8	30.6	128.3	8.1	50.2	0	0	334.1	0	0	0	0	0	0	0	7.6	25.1	0	15.7	13.8	17.5	45.2	0	0	0	0	0	0
ENSG00000197429	IPP	4.1	7.3	12.1	4.7	0	13.1	21.3	26.9	25.9	23.1	29.3	25	1.7	0	0	1.2	64.8	104.2	130	0	3.1	222.2	0	0	0	3.8	8.7	0	49.9	9.4	0	0.7	0	0	0	64.4	0	0
ENSG00000230896	AL604028.1	5.4	4.4	0	2	0	7.3	15.9	13.5	1.3	6.2	11.5	1.1	0	40.6	0	0	0	0	6.6	0	0	0	0	0	0	0	16.4	0	0	0	0	30.8	0	0	0	0	0	0
ENSG00000236111	AL603882.1	4.1	2.9	8.5	15.3	9.4	11.7	9.3	10.5	14.2	8	3.8	7.9	84.9	4.1	7.2	0	0	0	0	0	0	0	43.7	38.1	24.1	7.6	7.8	0	4.3	19.3	9.6	23	0	0	0	64.4	0	0
ENSG00000086015	MAST2	0	0	4.3	0	0	0	0	0	0	0.9	2.6	3.4	0	0	0	0	0	0	0	0	0	0	0	0	0	0	14.7	110.7	0	6.5	0	0.7	0	0	0	0	0	0
ENSG00000232467	TMA16P2	0	12.4	9.2	6.7	2.9	16.1	17.3	0	3.9	11.6	7.7	9.1	0	0	0	0	0	0	0	0	3.1	0	0	0	0	0	4.3	0	0	13	27.1	0	0	0	0	0	0	0
ENSG00000117461	PIK3R3	4.7	16.1	19.9	1.3	0	0	50.5	74.8	76.3	56.9	70.1	121.4	162.9	8.1	25.1	58.3	0	107.8	0	136.6	0	0	10.9	0	0	0	16.4	0	0.7	92.1	0	40	0	0	0	64.4	0	0
ENSG00000233114	AL358075.3	7.5	0	0	0.7	0	0	5.3	0	1.3	0	0	0	0	0	0	0	0	0	0	0	0	0	0	0	0	0	0	0	0	1.9	0	0	0	0	0	0	0	0
ENSG00000227857	AL358075.2	0	0	0	0	0	0	0	0	1.3	0	0	0	0	0	0	0	0	0	0	0	0	0	0	0	0	0	0	0	0	0	0	0	0	0	0	0	0	0
ENSG00000117472	TSPAN1	4.7	0.7	0	0.7	0	0.7	106.3	91.2	82.7	69.4	79.1	82.8	1.7	4.1	0	0	0	0	0	0	0	0	10.9	0	93.3	0	0.9	0	0	106.4	1.6	127.5	0	61.1	0	0	0	0
ENSG00000085998	POMGNT1	3.4	0.7	9.2	12	0	11.7	9.3	37.4	19.4	12.5	8.9	28.4	0	4.1	0	0	0	0	72.7	0	0	0	0	0	4.8	0	17.3	0	0	18.7	0	47.1	0	0	0	0	0	0
ENSG00000171357	LURAP1	0	0	0	2	0	0	0	0	0	3.6	1.3	0	0	0	0	0	0	0	0	0	0	0	0	0	0	0	0	0	0	5	0	0	0	0	0	0	0	0
ENSG00000085999	RAD54L	0	6.6	0.7	3.3	0	5.1	9.3	0	10.3	5.3	10.2	13.6	0	0	0	0	0	0	0	0	0	0	0	0	0	0	0	0	0	7.8	0	0	0	0	0	0	0	0
ENSG00000132128	LRRC41	20.3	27.1	18.5	21.3	23.1	0	31.9	40.4	45.3	20.5	40.8	10.2	3.5	0	0	1.2	0	0	0	0	0	0	0	0	1.6	86.9	21.6	0	63.4	26.9	0	17.4	0	0	0	0	0	40.3
ENSG00000173660	UQCRH	78.6	144.8	90.1	103.4	186.5	65.7	154.1	185.5	178.4	123.7	133.9	115.7	0	515.2	137.5	102.9	122.6	0	757.9	0	217.3	5	0	5.4	400.6	0	122.9	627.5	156.8	110.8	0	266.9	0	0	0	0	60.2	80.5
ENSG00000117481	NSUN4	23	8.8	3.5	19.3	23.1	40.9	9.3	13.5	20.7	24	38.3	21.5	0	0	35.9	0	0	3.6	83.7	0	37.8	0	0	0	6.4	3.8	30.3	15.8	0	15.5	92.4	25.6	0	61.1	0	0	0	120.8
ENSG00000117480	FAAH	3.4	5.1	0	3.3	1.4	0	35.9	85.3	60.8	28.5	49.7	25	1.7	0	0	0	0	0	0	0	0	0	131.2	0	0	0	32	0	0	41.7	0	0	0	0	0	0	0	0
ENSG00000232022	FAAHP1	0	0	0	0	0	0	0	0	3.9	0	0	0	0	0	0	0	0	0	0	0	0	0	0	0	0	0	0	0	0	0	0	0	0	0	0	0	0	0
ENSG00000162456	KNCN	0	0	0	0	0	0	0	0	0	0	0	1.1	0	0	0	0	0	0	0	0	0	0	0	0	0	0	0	0	0	0	0	0	0	0	0	0	0	0
ENSG00000079277	MKNK1	51.5	53.4	80.9	38	84.6	17.5	10.6	0	7.8	12.5	7.7	9.1	188.9	275.8	23.9	11.2	0	165.3	187.3	0	25.2	5	21.9	49	1.6	3.8	134.2	427.1	0.7	13	0	60.1	0	0	0	0	0	0
ENSG00000142961	MOB3C	25.1	21.2	26.3	20.7	24.6	19	15.9	1.5	5.2	10.7	3.8	2.3	0	8.1	22.7	0	0	0	0	209.4	0	0	10.9	0	17.7	0	11.3	10.5	26.4	6.3	0	17.8	0	0	0	0	0	0
ENSG00000123472	ATPAF1	16.3	38	33.4	28.7	24.6	73	47.8	50.9	34.9	47.2	31.9	19.3	1.7	4.1	169.8	89.3	0	0	0	0	0	333.3	10.9	0	0	7.6	10.4	453.5	0	14.3	0	7	0	0	67.4	0	0	0
ENSG00000233647	NENFP1	0	0	0	0	0	0	0	6	0	0	0	0	0	0	0	0	0	0	0	0	0	0	0	0	0	0	0	0	0	0	0	0	0	0	0	0	0	0
ENSG00000186118	TEX38	0	0	0	0	0	0	0	3	0	0	0	0	0	0	0	0	0	0	0	0	0	0	0	0	0	0	0	0	0	0	0	0	0	0	0	0	0	0
ENSG00000159658	EFCAB14	150.4	91.4	110.7	71.3	54.9	91.3	115.6	118.2	170.7	129	113.5	133.8	1.7	56.8	131.5	121.5	206.3	247.9	218.1	0	207.8	0	43.7	403.1	217.2	3.8	125.5	94.9	69.8	154.2	366.2	92.7	0	0	0	64.4	120.5	80.5
ENSG00000236476	AL593856.1	2.7	1.5	7.1	0.7	4.3	0	4	3	10.3	3.6	6.4	0	1.7	0	0	0	0	0	28.6	0	0	0	0	0	3.2	3.8	0	0	51.3	0	0	0	0	0	0	0	0	0
ENSG00000142973	CYP4B1	0	0	0	0	0	0	12	0	3.9	6.2	15.3	0	0	0	0	0	0	0	0	0	0	0	0	0	0	0	0	0	0	5	0	0	0	0	0	0	0	0
ENSG00000154198	CYP4Z2P	0	0	0	0	0	0	8	1.5	19.4	24	6.4	26.1	0	0	0	0	0	0	0	3	0	0	0	0	0	0	0	0	0	10.9	0	6.3	0	0	0	0	0	0
ENSG00000187048	CYP4A11	0	0	0	0	0	0	0	0	1.3	0	0	0	0	0	0	0	0	0	0	0	0	0	0	0	0	0	0	0	0	0	0	0	0	0	0	0	0	0
ENSG00000186377	CYP4X1	0	11	1.4	0	0	0.7	34.5	16.5	20.7	31.1	11.5	23.8	0	8.1	0	0	0	0	0	0	0	0	0	0	0	0	0.9	0	0	33.6	0	0	0	0	0	0	0	40.3
ENSG00000186160	CYP4Z1	0	0	0	0.7	0	0	102.3	73.3	68.5	67.6	84.2	60.1	0	12.2	0	1.2	0	0	0	0	0	0	0	0	0	0	0	0	0.7	65.5	1.6	63	0	0	0	0	0	0
ENSG00000225506	CYP4A22-AS1	0	0	0	0	0	0	2.7	3	0	0	0	0	0	0	0	0	0	0	0	0	0	0	0	0	0	0	0	0	0	0	0	0	0	0	0	0	0	0
ENSG00000162365	CYP4A22	0	0	0	0.7	0	0	0	0	0	0	0	0	0	0	0	0	0	0	0	0	0	0	0	0	0	0	0	0	0	0	0	0	0	0	0	0	0	0
ENSG00000224805	LINC00853	0	0	0	0	0	0	2.7	0	0	0	0	0	0	0	0	0	0	0	0	0	0	0	0	0	0	0	0	0	0	0	0	0	0	0	0	0	0	0
ENSG00000162366	PDZK1IP1	0	0	0	0	0	0	77	53.8	53	47.2	33.2	22.7	0	4.1	0	0	0	0	0	0	0	0	0	0	234.9	256.8	0	0	0	56.8	1.6	0.4	0	0	0	0	0	0
ENSG00000162367	TAL1	0	4.4	17.7	6.7	0	9.5	0	6	5.2	0	3.8	0	0	0	0	0	0	0	94.7	75.9	0	0	0	0	0	0	0	0	0.7	6.7	0	0	0	0	0	0	0	0
ENSG00000226252	AL135960.1	0	0	0	0	0	0	0	0	0	0	0	0	0	0	0	0	0	0	0	0	0	0	0	0	0	0	0	31.6	0	0	0	0	0	0	0	0	0	0
ENSG00000123473	STIL	0	0	0.7	14	0	0	4	3	5.2	6.2	3.8	17	0	0	0	0	0	0	0	0	0	0	0	0	0	0	0	0	0	0.2	0	0	0	0	0	0	0	0
ENSG00000162368	CMPK1	144.3	67.3	105	101.4	81.7	178.9	135.5	136.1	97	108.5	132.6	125.9	435.1	16.2	14.3	32.2	63.7	79	198.3	6.1	138.6	0	0	0	143.2	264.4	49.3	880.6	59.9	71.1	144.9	26	0	0	0	0	0	40.3
ENSG00000225762	LINC01389	0	0	0	0	0	0	5.3	0	0	0	0	0	0	0	0	0	0	0	0	0	0	0	0	0	0	0	0	0	0	0	0	0	0	0	0	0	0	0
ENSG00000186790	FOXE3	0	5.1	0	0	0	0	0	0	0	0	0	0	0	0	0	0	0	0	0	0	0	0	0	0	0	0	0	0	0	0	0	0	0	0	0	0	0	0
ENSG00000237424	FOXD2-AS1	0	0	1.4	0	0	0	0	0	0	0	3.8	9.1	0	0	4.8	0	0	0	0	0	0	0	0	0	0	0	0	0	4.3	0	0	0	0	0	0	64.4	0	0
ENSG00000186564	FOXD2	0	0.7	0	0	0	0	18.6	4.5	6.5	15.1	20.4	6.8	0	0	0	0	1.2	0	0	0	0	0	0	0	0	0	0	0	0	9.2	0	0	0	0	0	0	0	0
ENSG00000269113	TRABD2B	0	0	0	4	0	11	8	3	2.6	0	1.3	9.1	0	0	0	0	0	0	0	0	0	0	0	0	0	0	0	0	37.1	0	0	0	0	0	0	0	0	0
ENSG00000117834	SLC5A9	0	0	0	0	0	0	0	0	0	0.9	0	0	0	0	0	0	1.2	0	0	0	0	0	0	0	0	0	0	0	0	0	0	0	0	0	0	0	0	0
ENSG00000132122	SPATA6	0	0	0	5.3	0	0	25.2	17.9	14.2	21.4	14	28.4	3.5	0	0	44.6	0	0	0	0	0	0	0	0	0	3.8	0	0	0	38.2	3.2	0	0	0	0	0	60.2	0
ENSG00000223175	RNU4-61P	0	0	0.7	0	0	0	0	0	0	0	0	0	0	0	0	0	0	0	0	0	0	0	0	0	0	0	0	0	0	0	0	0	0	0	0	0	0	0
ENSG00000186094	AGBL4	6.1	0	0	0	2.9	0	0	3	0	0	0	5.7	0	0	0	0	0	0	0	0	0	0	0	0	0	0	0	0	0	0	0	0	0	0	0	0	0	0
ENSG00000162373	BEND5	0.7	0	8.5	0	0	0	4	0	1.3	0	0	2.3	0	0	0	0	0	0	0	0	0	0	0	0	0	0	0	0	69.1	0.2	12.7	0.4	0	0	0	0	0	0
ENSG00000162374	ELAVL4	0	0	0	0	0	0	1.3	0	0	0	2.6	0	0	0	0	0	0	0	0	0	0	0	0	0	0	0	0	0	0	0	0	0	0	0	0	0	0	0
ENSG00000284696	AL596275.2	0	0.7	0	0	0	0	0	0	0	0	0	0	0	0	0	0	0	0	0	0	0	0	0	0	0	0	0	0	0	0	0	0	0	0	0	0	0	0
ENSG00000234080	AL596275.1	0	2.9	4.3	2.7	0	0	0	0	0	0	1.3	0	0	0	0	0	0	0	0	0	0	0	0	0	25.7	0	0	0	83.4	1.3	0	0	0	0	0	0	0	0
ENSG00000225671	FCF1P6	0	6.6	5	0	0	0	2.7	0	0	0	2.6	1.1	0	0	0	0	2.4	0	0	0	0	0	0	0	0	0	0	0	0	0	0	0	0	0	0	0	0	0
ENSG00000185104	FAF1	10.2	16.1	37.6	10.7	34	34.3	73.1	55.3	45.3	47.2	19.1	37.4	1.7	8.1	0	0	0	50.3	0	54.6	0	0	0	0	1.6	11.3	13.8	0	7.1	40.1	0	39.3	0	0	0	0	0	0
ENSG00000237130	MRPS6P2	4.1	2.9	0	4	22.4	5.8	4	0	9.1	8.9	8.9	3.4	0	0	0	0	0	0	0	0	0	0	0	0	0	0	6.1	0	0	0	0	0	0	0	0	0	0	0
ENSG00000123080	CDKN2C	33.9	25.6	28.4	12.7	53.5	24.1	0	10.5	14.2	1.8	20.4	6.8	0	4.1	33.5	0	30.6	251.5	2.2	406.7	185.8	0	0	0	0	0	0.9	5.3	0	21.2	0	0	0	0	0	0	0	0
ENSG00000200262	Y_RNA	0	0	0	0	0	0	0	0	0	0	0	0	0	0	0	0	0	0	0	0	0	0	0	0	0	0	0	0	0	0.2	0	0.4	0	0	0	0	0	0
ENSG00000213478	CFL1P2	0	0	0	0	0	0	2.7	0	0	0	0	0	0	0	0	0	0	0	0	0	0	0	0	0	0	0	0	0	0	0	0	0	0	0	0	0	0	0
ENSG00000203356	LINC01562	0	0	0	0	0	0	0	0	0	0	0	2.3	0	0	0	0	0	0	0	0	0	0	0	0	0	0	0	0	0	0	0	0	0	0	0	0	0	0
ENSG00000123091	RNF11	144.3	124.3	73.8	79.3	127.2	73	127.5	178	153.9	104.1	140.3	128.2	1.7	4.1	172.2	145.1	154.4	636	171.8	594.8	330.7	5	21.9	256	30.6	256.8	199.1	0	0	86.2	71.7	128.3	0	0	0	0	60.2	40.3
ENSG00000233406	AL162430.1	0	0	0	0	0	0	0	0	0	0	0	0	0	0	0	0	0	0	0	0	0	0	0	0	0	0	0	0	20	2.9	0	0.4	0	0	0	0	0	0
ENSG00000085831	TTC39A	0	0.7	5	0.7	0	0	41.2	50.9	40.1	19.6	56.1	76	0	0	0	0	0	0	297.4	0	0	10.1	0	0	20.9	0	0.9	0	14.3	46.6	0	54.5	0	0	0	0	0	40.3
ENSG00000261664	TTC39A-AS1	0	0	0	0	0	0	0	0	2.6	0	2.6	0	0	0	0	0	0	0	0	0	0	0	0	0	0	0	0	0	0	0	0	0	0	0	0	0	0	0
ENSG00000085832	EPS15	161.2	127.2	83.7	106.7	122.9	26.3	45.2	88.2	53	71.2	67.6	40.8	10.4	231.2	108.8	107.9	0	18	15.4	0	840.8	10.1	0	261.5	271.9	71.8	158.4	669.7	34.9	46.6	33.4	70.4	0	0	0	128.8	0	40.3
ENSG00000232027	AL671986.1	0	0	0	0.7	0	0	0	0	0	0	0	0	0	0	0	0	0	0	0	0	0	0	0	0	0	0	0	0	0	2.5	0	1.5	0	0	0	0	0	0
ENSG00000227070	AC104170.1	10.8	0	0	0	2.9	0	0	3	9.1	9.8	3.8	5.7	0	0	0	0	0	0	0	0	0	0	0	0	40.2	0	0	0	0	0	0	0	0	0	0	0	0	0
ENSG00000227742	CALR4P	0	0	0	0	0	0	0	0	1.3	0	1.3	0	0	0	0	0	0	0	0	0	0	0	0	0	0	0	0	0	0	0	0	0	0	0	0	0	0	0
ENSG00000117859	OSBPL9	94.8	41.7	56.1	62	60	86.9	39.9	62.8	51.7	73.8	38.3	85.1	0	158.2	186.5	67	135.6	3.6	0	0	75.6	0	0	0	123.9	3.8	80.5	0	91.9	87.1	3.2	87.9	0	0	0	0	60.2	40.3
ENSG00000078618	NRDC	29.8	50.4	18.5	20	67.2	65	22.6	23.9	11.6	36.5	16.6	30.6	0	0	52.6	0	0	0	220.3	0	0	0	0	0	143.2	555.2	0.9	0	4.3	21.4	35	87.5	0	0	0	0	0	40.3
ENSG00000272175	AL050343.2	0	0	0	0	0	0	0	0	0	0	0	0	0	0	0	0	0	0	0	0	0	0	0	0	0	0	0	0	0	0.2	0	0	0	0	0	0	0	0
ENSG00000169213	RAB3B	0	0	7.1	0	0	0.7	2.7	32.9	6.5	32.9	0	2.3	0	0	0	0	0	0	0	0	0	0	0	0	9.7	0	0	0	0	0	0	41.9	0	0	0	0	0	0
ENSG00000117862	TXNDC12	40	62.1	58.2	45.3	53.5	46	74.4	46.4	47.8	70.3	29.3	46.5	367.5	4.1	0	0	0	125.8	123.4	3	214.1	0	0	0	0	0	45	0	1.4	43	0	24.8	0	0	0	0	0	0
ENSG00000198841	KTI12	7.5	11.7	0	20	17.3	0	9.3	3	3.9	4.4	0	12.5	0	0	0	0	0	0	0	0	0	0	0	0	45	0	0	0	47	5.5	0	11.9	0	0	0	0	0	0
ENSG00000223390	AL445685.1	0	0	0	0	0.7	0	0	0	0	0	0	1.1	0	0	0	0	0	0	0	0	0	0	0	0	0	0	4.3	0	0	0	0	0	0	0	0	0	0	0
ENSG00000134717	BTF3L4	27.8	71.7	36.9	52	39	55.5	63.8	46.4	100.8	32.9	26.8	55.6	88.4	16.2	28.7	248	5.9	75.5	436.2	0	0	0	0	0	0	0	0	0	0	80.6	0	4.1	53.8	61.1	0	0	0	40.3
ENSG00000157077	ZFYVE9	2	6.6	2.1	3.3	2.2	10.2	8	6	3.9	11.6	16.6	21.5	0	0	1.2	0	0	0	2.2	81.9	0	0	0	0	0	0	0	0	26.4	5	0	0	0	61.1	0	0	0	0
ENSG00000228407	AL139156.2	2	5.1	3.5	2	0	0	1.3	0	2.6	2.7	0	2.3	0	0	0	0	0	0	0	45.5	0	0	0	0	0	0	0.9	0	3.6	0	0	0	0	61.1	0	0	0	0
ENSG00000237663	DNAJC19P7	0	0	0	0	0	0	0	0	0	0	0	2.3	0	0	0	0	0	0	0	0	0	0	0	0	0	0	0	0	0	0	0	0	0	0	0	0	0	0
ENSG00000213735	ANAPC10P1	0	0	0	0.7	0	0	0	0	0	0	0	0	0	0	0	0	0	0	0	0	0	0	0	0	0	0	0	0	0	0	0	0	0	0	0	0	0	0
ENSG00000154222	CC2D1B	12.9	6.6	2.1	24.7	0	0.7	10.6	9	9.1	5.3	2.6	11.3	0	0	26.3	3.7	0	0	0	0	0	0	0	0	0	3.8	0	0	71.3	0	0	39.7	0	0	0	0	0	0
ENSG00000224680	PLA2G12AP1	0	0	17	0	0	0	0	0	2.6	2.7	3.8	1.1	0	0	0	0	0	0	0	0	0	0	0	0	0	0	0	0	0	0	0	0	0	0	0	0	0	0
ENSG00000085840	ORC1	0	0	6.4	0	0	0	0	6	0	3.6	12.8	4.5	0	0	0	0	0	0	0	0	0	0	0	0	0	0	0	0	0	0	0	11.5	0	0	0	0	0	0
ENSG00000134748	PRPF38A	4.1	14.6	18.5	1.3	8.7	9.5	10.6	16.5	19.4	11.6	21.7	20.4	0	0	0	231.9	0	251.5	0	248.9	0	1201.7	0	0	90.1	0	62.3	0	0	15.5	0	75.6	0	0	0	0	0	40.3
ENSG00000134744	ZCCHC11	25.7	41.7	31.9	42.7	13.7	67.9	15.9	0	5.2	18.7	15.3	5.7	0	0	59.8	102.9	124.9	0	0	0	163.8	0	21.9	103.5	0	3.8	14.7	0	42.8	8.2	0	0	0	0	0	64.4	0	0
ENSG00000236290	EEF1GP7	0	0	0	0	0	0	0	0	0	0	0	0	0	0	0	0	0	0	11	0	0	0	0	0	0	0	0	0	0	0	0	0	0	0	0	0	0	0
ENSG00000116157	GPX7	0	24.1	27.7	20.7	35.4	38.7	2.7	6	3.9	1.8	6.4	1.1	0	4.1	0	0	0	0	0	0	0	0	0	0	0	7.6	0	0	0	15.3	0	16.7	0	0	0	0	0	0
ENSG00000182183	FAM159A	0	0	0	0.7	0	0	2.7	0	1.3	0	2.6	0	0	0	0	14.9	1.2	0	0	0	0	0	10.9	0	0	0	0	0	0	4	23.9	0	0	0	0	0	0	0
ENSG00000162377	COA7	25.7	15.4	19.2	6.7	5.1	60.6	6.6	28.4	11.6	11.6	23	7.9	0	0	0	0	0	0	33	0	0	0	0	0	0	0	17.3	0	59.1	22	1.6	0.4	0	0	0	0	0	0
ENSG00000233664	NDUFS5P3	26.4	9.5	13.5	26.7	26.7	0	39.9	38.9	10.3	19.6	23	20.4	0	0	0	0	0	0	0	0	0	0	0	0	0	0	41.5	0	0	17.4	218.1	7.8	0	0	0	0	0	40.3
ENSG00000162378	ZYG11B	65	97.2	100.8	98	83.1	83.3	46.5	52.4	45.3	41.8	31.9	39.7	0	4.1	35.9	0	48.3	370.1	0	376.3	144.9	5	21.9	0	38.6	3.8	59.7	363.8	0	36.5	101.9	28.2	0	61.1	0	0	0	120.8
ENSG00000228929	RPS13P2	182.2	246.4	198.7	186.7	268.2	199.4	135.5	82.3	78.9	102.3	67.6	190.5	39.9	4.1	0	316.2	229.9	82.6	381.1	0	0	0	10.9	0	318.5	3.8	84.8	10.5	0	117.1	672	116.4	0	0	67.4	0	3432.9	120.8
ENSG00000203995	ZYG11A	0	0	0	0	0	0	0	0	1.3	0	3.8	0	0	0	0	0	0	0	0	0	0	0	0	0	0	0	0	0	0	0	0	0	0	0	0	0	0	0
ENSG00000121310	ECHDC2	50.8	21.2	17	44	28.2	56.2	31.9	31.4	41.4	64.9	67.6	36.3	0	113.6	287	60.8	214.5	0	26.4	0	330.7	0	0	0	3.2	0	39	0	6.4	41.7	132.2	28.2	0	0	0	0	0	0
ENSG00000230953	AC099677.1	12.9	11	9.9	10	11.6	19.7	2.7	0	10.3	10.7	7.7	13.6	0	0	0	0	1.2	0	0	0	0	0	142.1	0	0	0	0	0	2.1	0	0	0.4	0	0	0	0	0	0
ENSG00000116171	SCP2	153.8	149.9	178.8	106	141	197.9	73.1	178	82.7	185.9	79.1	89.6	117.9	8.1	27.5	153.8	172.1	546.1	0	100.2	0	196.9	10.9	604.6	22.5	3.8	143.7	0	20	123.6	81.2	116.8	0	0	0	0	120.5	0
ENSG00000264834	MIR1273F	0	0	0	0	0	0	0	0	0	0	0	0	0	0	0	0	0	0	0	0	0	5	0	0	0	0	0	0	0	0.2	0	0	0	0	0	0	0	0
ENSG00000265815	MIR1273G	0	0	0	0	0	0	0	0	1.3	0	0	0	0	0	0	0	0	0	0	0	0	0	0	0	0	0	0	0	0	0	0	0	0	0	0	0	0	0
ENSG00000226147	TUBBP10	11.5	11.7	0.7	7.3	0	15.3	8	0	5.2	6.2	14	14.7	0	0	0	0	0	0	0	0	6.3	0	0	0	0	34	0	0	0	22.7	0	8.9	0	0	0	0	0	0
ENSG00000174348	PODN	278.4	187.2	152.6	133.4	197.3	194.3	13.3	0	0	26.7	0	12.5	0	470.5	246.3	621.2	170.9	750.9	143.2	267.1	3.1	706.9	43.7	0	0	7.6	116.9	0	6.4	14.5	135.3	0.7	0	61.1	0	0	0	80.5
ENSG00000227644	HIGD1AP11	0	0	0	0	0	0	0	0	0	0	0	0	0	0	0	0	0	0	0	0	0	0	0	0	0	0	0	0	0	2.7	0	0	0	0	0	0	0	0
ENSG00000162383	SLC1A7	0	0	0	0	0	5.1	0	0	0	0	0	0	0	0	0	0	0	0	0	0	0	0	0	0	0	0	0	0	0	0	0	0	0	0	0	0	0	0
ENSG00000235563	AL445183.2	0	0	5	0	0	0	0	0	0	0	0	0	0	0	0	0	0	0	0	0	0	0	0	0	0	0	0	0	0	0	0	0	0	0	0	0	0	0
ENSG00000157184	CPT2	35.9	49	46.1	50	29.6	70.1	37.2	4.5	25.9	19.6	17.9	31.8	0	0	77.7	0	0	3.6	0	0	0	403.9	0	0	0	0	0	353.3	0	9	0	0	0	0	0	0	0	0
ENSG00000162384	C1orf123	40.6	25.6	46.1	40	70.1	54	14.6	15	7.8	8	5.1	2.3	0	4.1	173.4	0	103.7	150.9	0	3	0	5	0	5.4	115.8	0	129.8	0	0	6.3	0	30.4	0	0	0	0	4577.2	0
ENSG00000259818	AL606760.3	0	0	1.4	0.7	0	0	0	0	0	0.9	1.3	0	0	0	0	0	0	0	0	0	0	0	0	0	0	0	0	0	0	0	0	0	0	0	0	0	0	0
ENSG00000162385	MAGOH	19	22.7	46.1	48.7	53.5	8	25.2	23.9	25.9	53.4	38.3	39.7	78	0	12	16.1	0	0	0	0	0	0	10.9	0	0	3.8	32	0	79.8	18.7	0	27.4	53.8	0	0	0	0	0
ENSG00000226754	AL606760.1	0	0	0	0.7	0	0	0	0	1.3	0	0	0	0	0	0	0	0	0	0	0	0	0	0	0	0	0	0	0	0	1.7	0	0	0	0	0	0	0	0
ENSG00000157193	LRP8	6.1	12.4	7.8	10	0	0	45.2	41.9	53	63.2	31.9	51	0	0	29.9	96.7	0	0	0	0	0	0	0	0	70.8	219.1	10.4	0	2.9	31.7	0	41.5	0	0	0	0	0	40.3
ENSG00000230138	AC119428.2	4.7	0	0	0	0	0	0	0	0	1.8	0	0	0	0	0	0	0	0	0	0	0	0	0	0	0	0	0	0	0	5.9	0	0	0	0	0	0	0	0
ENSG00000174332	GLIS1	0	0	0	0	0	0	6.6	0	0	0	0	0	0	0	0	0	0	0	0	0	0	0	0	5.4	0	0	0	0	0	0	0	0	0	0	0	0	0	0
ENSG00000058804	NDC1	33.2	19	17.7	14.7	3.6	7.3	46.5	22.4	18.1	25.8	26.8	22.7	3.5	0	0	0	0	0	90.3	0	3.1	0	0	0	93.3	0	88.3	0	30.6	65	0	37.8	0	0	0	0	0	0
ENSG00000229687	AL049745.1	0	0	0.7	0	0	0	0	0	1.3	0	0	0	0	0	0	0	0	0	0	0	0	0	0	0	0	0	0	0	0	0	0	0	0	0	0	0	0	0
ENSG00000058799	YIPF1	21	14.6	13.5	32	44.1	54	45.2	58.3	29.7	58.7	29.3	29.5	1.7	8.1	0	86.8	71.9	0	134.4	15.2	0	0	10.9	0	0	0	3.5	0	9.3	53.9	23.9	0	0	0	0	0	0	0
ENSG00000211452	DIO1	0	0	0	0	0	0	0	0	1.3	2.7	0	0	0	0	0	0	0	0	0	0	0	0	0	0	0	0	0	0	0	0	0	0	0	0	0	0	0	0
ENSG00000081870	HSPB11	10.2	5.1	24.8	24.7	0	0	8	0	5.2	2.7	2.6	5.7	0	0	0	1.2	188.6	115	0	0	0	0	0	0	61.1	0	0	0	63.4	0.2	0	51.2	0	0	0	0	0	0
ENSG00000116212	LRRC42	49.5	32.9	22	56.7	5.1	16.1	41.2	28.4	28.4	30.2	39.5	18.1	0	0	0	0	0	0	0	0	226.7	0	0	0	0	0	14.7	0	37.1	23.7	95.5	0	0	0	0	0	0	0
ENSG00000219102	HNRNPA3P12	0	0	0	0.7	0	0	0	0	0	0	0	0	0	0	0	0	0	0	0	0	0	0	0	0	0	0	0	0	0	0	0	0	0	0	0	0	0	0
ENSG00000203985	LDLRAD1	0	0	0	0	0	0	2.7	0	5.2	0	0	4.5	0	0	0	0	0	0	0	0	0	0	0	0	0	0	0	0	0	0	0	0	0	0	0	0	0	0
ENSG00000116209	TMEM59	175.5	222.3	314.4	308.7	347	311.8	430.4	402.4	402.1	453.7	413.2	537.6	175.1	251.5	185.3	364.6	242.8	147.3	72.7	170	840.8	732.1	32.8	201.5	234.9	559	202.5	638	305.7	317.2	297.8	266.2	53.8	61.1	0	128.8	180.7	120.8
ENSG00000116205	TCEANC2	0	21.9	19.9	6.7	13.7	25.6	5.3	9	9.1	4.4	2.6	14.7	0	0	0	0	38.9	0	0	0	0	75.7	0	0	54.7	0	0	0	0	0	0	0	0	61.1	0	0	0	0
ENSG00000225183	AL353898.1	7.5	5.8	13.5	3.3	3.6	0	6.6	17.9	18.1	2.7	3.8	4.5	0	0	0	0	0	0	0	0	0	0	0	0	0	0	0	0	0	9.2	0	0	0	0	0	0	0	0
ENSG00000215883	CYB5RL	0	13.9	0	0	0	0	5.3	10.5	0	5.3	0	2.3	495.8	0	0	0	0	0	44.1	3	0	0	0	0	0	0	0	0	0	0.2	0	0.4	0	0	0	0	0	0
ENSG00000116221	MRPL37	19.6	21.2	23.4	24	14.5	8	18.6	22.4	27.2	11.6	28.1	23.8	0	4.1	0	0	0	0	458.2	0	103.9	10.1	0	0	1.6	0	0	0	31.4	13.6	0	14.8	0	0	0	0	60.2	0
ENSG00000157216	SSBP3	61	31.4	40.5	40.7	44.8	26.3	42.5	46.4	45.3	31.1	34.4	29.5	43.3	0	15.5	111.6	0	0	63.9	0	390.5	0	0	0	61.1	3.8	75.3	0	77.7	35.7	0	4.8	0	61.1	0	64.4	5239.7	0
ENSG00000198711	SSBP3-AS1	0	0	0	0	0	19.7	0	0	0	0	0	0	0	0	0	0	0	0	0	0	0	0	0	0	0	0	0	0	0	0	0	0	0	0	0	0	0	0
ENSG00000237173	AC099796.2	0	0.7	0	23.3	0	0	0	0	0	4.4	0	0	0	0	0	0	0	0	0	0	0	0	0	0	0	0	0	0	0	0.8	0	0	0	0	0	0	0	0
ENSG00000162390	ACOT11	3.4	19	5.7	8	0.7	10.2	4	0	0	8	1.3	3.4	0	0	0	0	0	0	0	0	85	0	0	0	0	0	0	0	0	0.2	0	0	0	0	0	0	0	0
ENSG00000243725	TTC4	0	0	0	0	0	0	0	0	0	3.6	0	0	0	0	0	0	0	0	0	0	0	0	0	0	0	0	0	0	0	8	0	0	0	0	0	0	0	0
ENSG00000162396	PARS2	0	0	10.6	0.7	0	0	2.7	1.5	3.9	4.4	0	5.7	0	0	0	0	0	0	0	0	0	0	0	0	0	0	0	0	0	0	0	0	0	0	0	0	0	0
ENSG00000006555	TTC22	0	0	2.8	0	0	12.4	2.7	0	3.9	9.8	2.6	3.4	0	0	0	0	53	0	0	0	0	0	0	0	0	0	0	0	0	6.1	0	0.4	0	0	0	0	0	0
ENSG00000116133	DHCR24	0	3.7	2.8	3.3	0	0	208.6	119.7	131.9	155.7	146.6	209.8	1.7	0	0	0	0	75.5	0	94.1	0	5	21.9	0	99.7	15.1	0	0	0	151.2	162.4	158.7	0	0	0	0	0	4309.3
ENSG00000143001	TMEM61	0	0	0	0	0	0	8	0	0	1.8	8.9	7.9	0	0	0	0	0	0	0	0	0	0	0	0	0	0	0	0	0.7	0	0	3	0	0	0	0	0	0
ENSG00000169174	PCSK9	0	0	0	0	0	0	5.3	10.5	6.5	4.4	3.8	12.5	0	0	0	0	0	0	0	0	0	0	0	0	0	0	0	0	0	6.9	0	0	0	0	0	0	0	0
ENSG00000162402	USP24	34.6	24.9	16.3	2.7	0.7	47.5	34.5	6	19.4	23.1	31.9	19.3	0	81.1	0	114.1	0	122.2	52.9	0	0	287.8	10.9	0	0	166.2	61.5	0	55.6	12	0	18.2	0	0	0	0	0	0
ENSG00000260971	AC119674.1	0	0	0	4	0	0	0	0	1.3	0	1.3	0	0	0	0	0	0	0	0	0	0	0	0	0	38.6	0	0	0	0	0	0	0	0	0	0	0	0	0
ENSG00000162407	PLPP3	181.6	138.2	126.3	156	67.2	173.8	35.9	6	32.3	44.5	53.6	94.1	0	8.1	105.2	415.4	101.4	682.7	193.9	0	176.4	802.8	32.8	179.8	0	132.2	115.1	5.3	69.1	120.4	565.3	66.4	0	61.1	67.4	0	0	80.5
ENSG00000236776	RPL21P23	10.8	0	0.7	0	0.7	16.1	5.3	6	0	1.8	0	0	0	0	0	0	0	0	0	0	0	0	0	0	0	0	1.7	0	0	9.2	0	0	0	61.1	0	0	0	40.3
ENSG00000225475	AC099789.1	2.7	7.3	0.7	3.3	5.8	8	9.3	9	15.5	16.9	12.8	9.1	8.7	0	19.1	0	1.2	0	0	0	0	20.2	0	16.3	0	0	14.7	0	26.4	6.1	0	0	0	0	0	0	0	0
ENSG00000162409	PRKAA2	0	0	0	4.7	0	0	10.6	35.9	14.2	25.8	10.2	20.4	0	0	0	1.2	0	172.5	0	0	450.3	0	0	0	1.6	0	0	0	0	5.5	0	20.8	0	0	0	0	0	0
ENSG00000187889	FYB2	0	0	0	0	0	0	0	0	0	0	1.3	0	0	0	0	0	0	0	0	0	0	0	0	0	0	0	0	0	0	4	0	0	0	0	0	0	0	0
ENSG00000173406	DAB1	0	4.4	0	0	12.3	0	0	0	0	0	0	0	0	0	0	0	0	0	0	0	0	0	0	0	0	0	0	0	0	0	0	0	0	0	0	0	0	0
ENSG00000236888	RPS20P5	2	4.4	2.1	14	1.4	0	1.3	0	1.3	0.9	2.6	1.1	0	0	4.8	1.2	0	0	0	0	0	0	0	0	0	0	0	0	5	1.5	9.6	8.2	0	0	0	0	0	40.3
ENSG00000162600	OMA1	0	0	2.8	1.3	9.4	10.2	2.7	13.5	24.6	4.4	2.6	2.3	8.7	0	0	0	0	0	0	0	0	5	0	0	54.7	0	63.2	0	0	15.7	0	0	0	0	0	0	0	0
ENSG00000264128	RN7SL713P	0	0	0	0.7	0	0	0	0	0	0	0	0	0	0	0	0	0	0	0	0	0	0	0	0	0	0	0	0	0	0	0	0	0	0	0	0	0	0
ENSG00000184292	TACSTD2	1.4	1.5	5	5.3	17.3	0.7	650.9	583.3	616.7	468	725.6	573.9	0	344.8	0	0	0	0	2.2	0	0	0	1803.9	452.1	32.2	604.3	46.7	5.3	193.8	552.3	1.6	260.3	0	0	0	0	60.2	241.6
ENSG00000185839	AL035411.1	0	0	0	0	0	0	0	1.5	0	0	0	0	0	0	0	0	0	0	0	0	0	0	0	0	0	0	0	0	0	0	0	0	0	0	0	0	0	0
ENSG00000162601	MYSM1	29.8	69.5	44.7	64.7	54.2	32.1	39.9	19.4	42.7	40	38.3	36.3	1.7	0	133.9	47.1	117.9	68.3	0	382.4	0	0	10.9	76.3	1.6	7.6	81.4	237.3	29.9	22.7	0	173.9	0	0	0	128.8	0	40.3
ENSG00000283445	AL136985.3	0	0	0	0	0	0	2.7	0	0	0	5.1	0	0	0	0	0	0	0	0	0	0	0	0	0	0	0	0	0	0	10.9	0	0	0	0	0	0	0	0
ENSG00000177606	JUN	500	474.5	415.9	462.1	404.1	447.7	199.3	221.4	134.5	89	141.5	147.4	171.6	900.5	784.4	453.8	104.9	582.1	449.4	980.3	592	575.6	54.7	0	149.6	26.4	132.4	427.1	128.3	125.2	402.9	151.6	0	244.6	67.4	64.4	0	40.3
ENSG00000232453	AC105277.1	0	11.7	5.7	4.7	10.1	0	1.3	0	0	1.8	0	0	0	0	0	0	0	0	0	0	0	0	0	0	0	0	0	0	0	0	0	0.4	0	0	0	0	0	0
ENSG00000237352	LINC01358	0	5.1	0	0	7.2	0.7	0	0	0	0	0	0	0	0	6	0	0	0	0	0	0	0	0	0	0	0	0	0	0	0	0	0	0	0	0	0	0	0
ENSG00000228121	PHBP3	2	0	0	0	0	0	1.3	0	0	2.7	0	0	0	0	0	0	0	0	0	0	0	0	0	0	0	0	0	0	0	0	0	0	0	0	0	0	0	0
ENSG00000270457	AC093424.1	0	0	0.7	0	0	0	0	0	0	0	0	0	0	0	0	0	0	0	0	0	0	0	0	0	0	0	0	0	0	0	0	0	0	0	0	0	0	0
ENSG00000172456	FGGY	3.4	11	17	0	10.8	0	4	4.5	18.1	5.3	16.6	13.6	0	0	0	138.9	0	0	0	0	0	5	0	0	64.4	0	0	0	0	6.7	0	0	0	0	0	0	0	0
ENSG00000134709	HOOK1	2.7	0.7	2.8	2	0	0	37.2	44.9	49.1	47.2	34.4	47.6	0	4.1	0	0	0	0	2.2	0	0	0	0	0	148	0	0	0	0	33.8	0	56.7	0	0	0	0	0	0
ENSG00000134716	CYP2J2	0	0	0	0	0	0	0	10.5	2.6	16	2.6	10.2	0	0	0	0	0	0	0	0	0	0	0	0	0	0	0	0	0	1.5	0	1.9	0	0	0	0	0	0
ENSG00000226476	LINC01748	0	0	0	0	0	0	0	0	9.1	0	8.9	10.2	0	0	0	0	0	0	0	0	0	0	0	0	0	0	0	0	0	12.4	0	3	53.8	0	0	0	0	0
ENSG00000162599	NFIA	77.2	110.4	147.6	98.7	172	93.5	333.4	360.5	355.6	396.8	297.1	412.8	5.2	1261.5	507	704.3	902.9	513.8	764.5	500.8	440.9	823	43.7	424.9	45	181.3	156.7	369.1	259.4	337.3	54.1	436.7	0	122.3	0	193.2	0	80.5
ENSG00000270742	AC096947.1	0	0	0	0	0	0	0	0	0	0.9	0	0	0	0	0	0	0	0	0	0	0	0	0	0	0	0	0	0	0	0	0	1.1	0	0	0	0	0	0
ENSG00000162604	TM2D1	65.7	92.9	67.4	68.7	60.7	28.5	54.5	68.8	46.5	56.9	49.7	47.6	0	0	0	0	2.4	7.2	0	352	6.3	747.3	21.9	0	72.4	0	101.3	0	7.8	32.5	0	54.5	0	0	808.9	0	0	40.3
ENSG00000271200	AC099791.2	4.1	6.6	0	0	0	0	0	15	0	0	0	0	0	0	0	0	0	0	0	0	0	0	0	0	0	0	7.8	0	0	5.7	0	0	0	0	0	0	0	0
ENSG00000132849	PATJ	10.2	0	0	10.7	23.1	0	62.4	26.9	49.1	41.8	48.5	40.8	0	8.1	0	2.5	0	0	0	0	0	0	0	0	0	0	0	0	9.3	48.7	0	0	0	0	0	0	0	40.3
ENSG00000236646	LAMTOR5P1	0	0	0	0	0	0	0	0	0	0	0	0	0	0	0	0	0	0	0	0	0	0	0	0	0	3.8	0	0	0	6.1	0	0	0	0	0	0	0	0
ENSG00000242860	RN7SL180P	0	0	0	0	0	0	0	0	1.3	0	0	0	0	0	0	0	0	0	2.2	0	0	0	0	0	0	0	0	0	0	0	0	0	0	0	0	0	0	0
ENSG00000240563	L1TD1	8.1	0	0	0	0	0	2.7	0	0	0	0	0	0	0	0	0	0	0	0	0	0	0	0	0	0	0	0	0	0	0	0	0	0	0	0	0	0	0
ENSG00000132854	KANK4	14.2	2.9	0	0	0.7	0	0	0	1.3	1.8	2.6	2.3	0	0	0	0	88.4	0	0	0	0	0	0	0	0	0	0	0	0.7	0.4	0	1.9	0	0	0	0	0	0
ENSG00000162607	USP1	20.3	52.6	41.2	23.3	42.6	35.1	51.8	38.9	53	49.8	53.6	26.1	0	0	0	1.2	91.9	0	0	0	195.2	0	0	0	0	3.8	8.7	52.7	10	18.3	66.9	55.6	0	0	0	0	0	0
ENSG00000116641	DOCK7	12.9	57	20.6	21.3	26	16.8	12	9	9.1	12.5	12.8	0	0	4.1	0	0	1.2	0	0	0	160.6	0	0	0	75.6	0	99.5	0	0	16.8	57.3	0	0	0	0	0	0	0
ENSG00000213703	AL138847.1	0	0	0.7	0	0	0	0	0	0	0.9	1.3	0	1.7	0	0	0	0	21.6	0	0	0	5	0	0	0	0	0	0	0	0	0	0	0	0	0	0	0	0
ENSG00000125703	ATG4C	79.3	43.9	30.5	20	16.6	48.2	12	1.5	1.3	11.6	7.7	12.5	0	0	0	0	0	75.5	0	0	0	0	0	0	0	11.3	0	0	156.8	0.2	0	27.1	0	0	0	0	0	0
ENSG00000224209	LINC00466	0	0	0	0	0	0	1.3	0	0	0	0	0	0	0	0	0	0	0	0	0	0	45.4	0	0	0	0	0	0	0	0	0	0	0	0	0	0	0	0
ENSG00000230798	FOXD3-AS1	0	0	0	0	0	0	5.3	13.5	1.3	0	0	0	0	0	0	0	0	0	0	0	0	0	0	0	0	0	0	0	0	6.3	0	0	0	0	0	0	0	0
ENSG00000236674	AL049636.1	3.4	2.2	0.7	0	0	0	0	0	0	2.7	0	0	0	0	0	0	0	0	0	0	0	0	0	0	0	0	0.9	0	0	0	0	0	0	0	0	0	0	0
ENSG00000088035	ALG6	20.3	0	0.7	5.3	17.3	35.8	31.9	1.5	23.3	32	14	15.9	0	0	0	0	0	43.1	0	9.1	31.5	0	0	0	0	3.8	0	0	63.4	0	105.1	53	0	0	0	0	0	0
ENSG00000142856	ITGB3BP	6.1	21.9	2.8	8.7	51.3	34.3	30.6	0	22	14.2	7.7	21.5	0	8.1	0	3.7	0	0	70.5	0	47.2	0	0	0	218.8	0	6.1	0	0	26.9	4.8	0	0	61.1	0	0	0	0
ENSG00000203965	EFCAB7	0	0	2.1	0	0	5.1	0	4.5	2.6	1.8	2.6	10.2	0	0	0	11.2	0	0	0	0	0	0	0	0	0	0	0	0	0	0	8	0.4	0	0	0	0	0	0
ENSG00000116652	DLEU2L	0	0	10.6	14	0	0	1.3	0	1.3	0.9	0	3.4	0	0	0	0	0	0	0	0	0	0	0	0	0	0	0	0	0	0	0	13	1830.2	0	0	0	0	0
ENSG00000276884	DLEU2_6	0	0	0	0	0	0	0	0	0	0	0	0	0	0	0	0	0	0	0	0	3.1	0	0	0	0	0	0	0	0	0	0	0	0	0	0	0	0	0
ENSG00000079739	PGM1	34.6	38.8	32.6	40.7	73.7	19.7	29.2	23.9	36.2	59.6	44.6	31.8	1.7	16.2	145.9	202.1	41.3	35.9	66.1	0	0	560.5	0	141.6	96.5	0	51.9	0	0	50.3	0	32.3	0	0	0	0	0	0
ENSG00000244256	RN7SL130P	0	0	2.1	0.7	0	0	2.7	0	0	7.1	1.3	0	0	0	0	0	0	0	0	0	0	0	0	0	0	0	0	0	0	0	0	0	0	0	0	0	0	0
ENSG00000185483	ROR1	16.3	19	27.7	40.7	44.8	65	0	1.5	0	8.9	8.9	11.3	17.3	0	0	0	95.5	0	0	0	66.1	0	0	0	0	0	66.7	0	38.5	0	0	0	0	0	0	0	60.2	0
ENSG00000177452	AL161742.1	9.5	26.3	28.4	21.3	44.1	13.9	197.9	184	210.7	174.4	209.1	187.1	8.7	32.5	25.1	2.5	1.2	3.6	41.9	3	50.4	0	43.7	0	135.1	83.1	19.9	10.5	36.3	212.1	90.8	189.4	0	0	0	0	0	0
ENSG00000223949	ROR1-AS1	0	0	0	0	0	0	0	0	0	0	0	0	0	0	0	0	0	0	0	0	0	0	0	0	0	7.6	0	0	0.7	0	0	0	0	0	0	0	0	0
ENSG00000158966	CACHD1	0	0	0	0	10.1	22.6	0	16.5	2.6	4.4	1.3	0	0	0	0	162.4	0	0	0	0	0	0	0	0	0	0	52.8	0	0	19.9	0	0	0	0	0	0	0	0
ENSG00000162437	RAVER2	2.7	8.8	0	5.3	5.1	0	0	4.5	0	0	0	0	0	0	0	0	0	0	0	0	0	0	0	0	0	0	0	0	0	0	0	0	0	0	0	0	0	0
ENSG00000162434	JAK1	155.1	162.3	150.4	151.4	127.9	109.5	69.1	44.9	56.9	48	54.8	82.8	46.8	117.6	264.3	3.7	393.7	0	127.8	72.8	126	575.6	0	234.2	193.1	3.8	167.1	0	30.6	78.2	563.7	107.9	0	61.1	0	0	0	80.5
ENSG00000234784	AL606517.2	0	0.7	0	0	0	1.5	0	0	0	1.8	1.3	0	0	4.1	0	0	0	7.2	0	0	0	0	0	0	0	0	0	0	0	0	0	0	0	0	0	0	0	0
ENSG00000233877	AL606517.1	4.7	0	2.1	0.7	10.8	0	0	0	0	0	0	3.4	0	0	0	0	0	0	0	0	0	0	0	0	0	0	0	0	0	0	0	0	0	0	0	0	0	0
ENSG00000226891	LINC01359	0.7	0	0	2	0	0	0	0	0	0	0	0	0	0	0	0	0	0	0	0	0	0	0	0	0	0	0	0	0	0	0	0	0	0	0	0	0	0
ENSG00000185031	SLC2A3P2	0	0	5	0	0	0	0	0	0	0	0	0	0	0	0	0	0	0	0	0	0	0	0	0	0	0	0	0	0	0	0	0	0	0	0	0	0	0
ENSG00000231485	AL357078.1	0	0	1.4	2	0	7.3	2.7	0	0	0	0	0	0	0	0	0	0	0	0	0	0	0	0	0	0	0	0	0	0	0	0	41.2	0	0	0	0	0	0
ENSG00000235804	AL357078.2	10.2	20.5	9.2	18.7	5.8	13.1	30.6	10.5	14.2	21.4	23	13.6	0	8.1	0	0	0	0	28.6	0	0	0	0	0	3.2	0	21.6	0	2.9	31	15.9	56.7	0	0	0	0	0	40.3
ENSG00000234496	MRPS21P1	0	0	0	4	0	0	2.7	0	0	0	0	0	0	0	0	0	0	0	0	0	0	0	0	0	0	0	11.3	0	0	0	0	0	0	0	0	0	0	0
ENSG00000162433	AK4	14.2	11.7	19.2	4	0	0	0	25.4	2.6	29.4	0	2.3	0	543.5	194.9	0	0	0	0	0	0	0	0	0	0	11.3	0	0	0	3.6	0	0	0	0	0	0	0	0
ENSG00000231622	RPS29P7	0	0	1.4	0	0	0.7	0	15	0	0	0	0	0	0	0	0	0	0	0	0	0	0	0	0	0	0	0	0	0	0	0	0	0	0	0	0	0	0
ENSG00000116675	DNAJC6	6.1	8	2.1	4	0	1.5	2.7	3	7.8	5.3	7.7	18.1	0	0	0	0	0	0	0	0	0	0	0	0	0	0	0	0	0	18.9	0	10	0	0	0	0	0	0
ENSG00000234144	COX6CP13	0	0.7	0	0	0	0	0	0	0	0	0	0	0	0	0	0	0	0	0	0	0	0	0	0	0	0	0	0	0	0	0	0	0	0	0	0	0	0
ENSG00000213625	LEPROT	113.1	236.9	141.2	130	141	179.7	140.8	73.3	109.9	158.4	76.5	104.3	372.7	8.1	573.9	451.3	304.1	370.1	442.8	6.1	0	323.2	10.9	5.4	131.9	249.3	283	0	129.7	115	415.6	111.2	0	122.3	0	0	0	40.3
ENSG00000116678	LEPR	18.3	10.2	13.5	8	8	10.2	1.3	0	2.6	3.6	1.3	4.5	0	4.1	31.1	529.5	95.5	154.5	77.1	370.3	548	545.3	43.7	5.4	0	336.1	22.5	0	106.9	8.8	191.1	31.9	0	0	0	0	0	40.3
ENSG00000237852	AC119800.1	0	0	0	0	0	0	0	0	0	0	0	0	0	0	0	0	0	0	0	54.6	0	0	10.9	0	0	0	0	0	0	0	0	0	0	0	0	0	0	0
ENSG00000184588	PDE4B	0.7	12.4	2.8	14.7	18.1	0	9.3	23.9	12.9	20.5	10.2	26.1	0	0	93.3	0	0	0	0	0	0	252.5	0	0	0	7.6	50.2	0	49.9	20.8	0	0	0	0	67.4	0	0	1490.1
ENSG00000118473	SGIP1	11.5	12.4	1.4	11.3	6.5	0	8	0	0	3.6	0	10.2	0	44.6	0	0	0	0	0	0	0	0	0	0	0	0	0	0	0	3.4	0	0	0	0	0	0	0	0
ENSG00000152760	TCTEX1D1	0	0	0	6	5.1	0	0	0	0	0	0	0	0	0	0	0	0	0	0	0	0	0	0	0	0	0	0	0	0	0	0	0	0	0	0	0	0	0
ENSG00000152763	WDR78	0	0	0	1.3	0	0	0	26.9	1.3	17.8	7.7	15.9	0	0	0	0	0	0	0	0	0	0	0	0	0	0	0	290	0	8.6	0	0	0	0	0	0	0	0
ENSG00000198160	MIER1	94.2	120.6	99.4	64	28.2	32.1	46.5	38.9	19.4	32	28.1	65.8	3.5	0	0	0	145	0	149.8	145.7	0	0	0	0	0	3.8	17.3	0	68.4	62.9	49.4	54.1	0	0	67.4	0	0	40.3
ENSG00000116704	SLC35D1	15.6	20.5	7.8	9.3	3.6	11.7	19.9	19.4	19.4	24	14	18.1	0	0	159	6.2	0	0	0	0	0	0	0	5.4	0	0	0	0	0	0	0	46.3	0	0	0	0	0	0
ENSG00000252433	SNORA31	0	0	0	0	0	0	0	0	9.1	0	0	0	0	0	0	0	0	0	0	0	0	0	0	0	0	0	0	0	0	0	0	0	0	0	0	0	0	0
ENSG00000275678	AL133320.1	0	0	0	0	0	2.9	0	0	0	0	1.3	0	0	0	0	0	0	0	0	0	0	0	0	0	0	0	0	0	0	0	0	0	0	0	0	0	0	0
ENSG00000162594	IL23R	0	0	0	0	0	1.5	0	0	0	0	0	0	0	0	0	0	0	0	0	0	0	30.3	0	0	0	0	0	0	0	0	0	0	0	0	0	0	0	0
ENSG00000228523	AL389925.1	0	0	3.5	0	0	6.6	6.6	0	0	1.8	2.6	0	0	0	0	0	0	0	0	0	0	0	0	0	0	0	0	0	0	13.2	0	0.4	0	61.1	0	0	0	0
ENSG00000081985	IL12RB2	0	0	0	0	0	0	0	0	0	0	0	0	0	0	7.2	0	0	0	0	0	0	0	0	0	0	0	0	0	0	0	0	0	0	0	0	0	0	0
ENSG00000142864	SERBP1	112.5	198.9	161.8	146.7	98.3	125.6	197.9	137.6	155.1	130.8	184.9	137.2	516.6	8.1	38.3	73.2	91.9	140.1	101.3	9.1	532.2	0	0	103.5	85.3	207.7	320.3	21.1	130.4	85.4	157.6	178.7	53.8	0	0	0	0	40.3
ENSG00000116717	GADD45A	16.3	24.9	31.9	56.7	47	63.5	12	58.3	19.4	27.6	21.7	13.6	0	0	44.2	33.5	51.9	64.7	50.7	0	0	0	0	0	1.6	3.8	143.7	0	89.8	41.3	6.4	14.5	2853	0	0	0	0	40.3
ENSG00000172380	GNG12	51.5	24.9	37.6	38.7	96.9	9.5	42.5	26.9	42.7	32	39.5	36.3	1.7	0	178.2	117.8	160.3	89.8	343.7	15.2	0	5	10.9	337.7	3.2	0	92.6	5.3	56.3	82	0	93.1	0	0	0	0	0	40.3
ENSG00000238778	RNU7-80P	0	0	1.4	0	0	0	0	0	0	0	0	0	0	0	0	0	0	0	0	0	0	0	0	0	0	0	0	0	0	0	0	0	0	0	0	0	0	0
ENSG00000232284	GNG12-AS1	0	0	0	0	5.8	0	0	0	0	0	0	1.1	0	0	0	0	0	0	0	0	0	0	0	0	0	0	0	0	0	0	0	0	0	0	0	0	0	0
ENSG00000235055	AL157407.1	0	0	0	2	0	4.4	0	0	0	0	0	0	0	0	0	0	0	0	0	0	0	0	0	0	0	0	0	0	0	0	0	0	0	0	0	0	0	0
ENSG00000162595	DIRAS3	0	0	0	4	0	0	4	13.5	0	11.6	3.8	4.5	1.7	0	0	0	0	0	0	0	0	0	0	0	64.4	0	0	0	0	0	11.1	0	0	0	0	0	0	0
ENSG00000116729	WLS	19	5.1	9.9	13.3	29.6	10.2	4	0	9.1	0	0	6.8	0	0	0	16.1	0	0	0	9.1	0	0	0	0	0	3.8	0	353.3	55.6	7.8	0	9.6	0	0	0	0	0	0
ENSG00000229133	RPS7P4	28.5	7.3	10.6	12	8	24.8	13.3	6	5.2	6.2	1.3	9.1	27.7	4.1	0	1.2	77.8	0	0	0	0	0	1224.5	0	0	3.8	0.9	0	0	34.6	0	3	0	0	0	193.2	0	0
ENSG00000237622	ELOCP18	4.7	5.8	0	0.7	13.7	0	6.6	7.5	2.6	3.6	6.4	9.1	0	0	0	0	27.1	0	0	0	0	0	0	0	0	0	0	0	0	12.6	0	45.6	0	0	0	0	0	0
ENSG00000229440	AL139413.1	0	0	0	0	0	0	0	0	0	0	1.3	0	0	0	0	0	0	0	0	0	0	0	0	0	0	0	0	0	0	0	0	0	0	0	0	0	0	0
ENSG00000024526	DEPDC1	8.1	0.7	0	0	0	0	2.7	0	3.9	4.4	14	12.5	0	0	0	0	0	0	0	0	0	0	0	0	0	0	0	0	0	1.7	0	0	0	0	0	0	0	0
ENSG00000033122	LRRC7	0	0	0	0	0	0	6.6	3	9.1	18.7	5.1	2.3	0	0	0	1.2	0	0	0	0	0	0	0	0	0	0	0	0	0	5.5	0	0	0	0	0	0	0	0
ENSG00000229359	PIN1P1	4.7	2.9	2.8	8.7	21	18.3	4	10.5	9.1	5.3	10.2	7.9	0	0	0	1.2	0	0	0	0	144.9	0	0	0	17.7	0	0	0	0	13.6	0	0.7	0	0	0	0	0	0
ENSG00000066557	LRRC40	35.2	26.3	58.2	36	19.5	7.3	10.6	34.4	20.7	14.2	29.3	28.4	121.3	0	0	0	244	301.8	0	0	0	0	0	0	3.2	3.8	84	0	76.2	23.1	0	18.5	0	61.1	0	0	0	120.8
ENSG00000244389	RN7SL242P	0	0	0	0	0	0	0	0	0	0	2.6	6.8	0	0	0	0	0	0	0	0	0	0	0	0	0	0	0	0	0	0	0	0	0	0	0	0	0	0
ENSG00000116754	SRSF11	225.6	271.3	350.6	254.7	310.8	315.5	301.5	303.6	303.8	226.9	376.2	350.5	239.2	811.3	230.8	151.3	286.4	50.3	473.7	133.5	296	434.2	196.8	163.4	403.8	11.3	437.1	0	269.3	359.6	135.3	329.6	107.7	122.3	674.1	128.8	60.2	201.4
ENSG00000118454	ANKRD13C	26.4	19.7	7.8	12	18.8	63.5	23.9	17.9	23.3	15.1	21.7	22.7	0	0	0	0	0	0	0	0	0	0	0	0	77.2	3.8	0.9	506.2	101.2	10.1	0	0.4	0	0	0	64.4	0	40.3
ENSG00000116761	CTH	0	0	0	0	0	0	0	0	0	0	1.3	3.4	0	0	0	0	0	0	0	0	0	0	0	0	0	0	0	0	0	0	0	0	0	0	0	0	0	0
ENSG00000278636	Metazoa_SRP	0	0	0	0	0	0.7	0	0	0	0	0	0	0	0	0	0	0	0	0	0	0	0	0	0	0	0	0	0	0	0	0	0	0	0	0	0	0	0
ENSG00000233020	AL354872.1	0	0	4.3	0	0	0	0	0	6.5	0	1.3	2.3	0	0	0	0	0	0	0	0	0	0	0	0	0	0	0	0	0	0	0	0	0	0	0	0	0	0
ENSG00000237033	CASP3P1	0	0	0	0	0.7	0	0	0	5.2	0	0	0	0	0	0	0	0	0	0	0	0	0	0	0	0	0	0	0	0	0	0	0	0	0	0	0	0	0
ENSG00000226208	AL513285.1	0	0	0	0	0	0	0	0	2.6	0	0	0	0	0	0	0	0	0	0	0	0	0	0	0	0	0	0	0	0	0	0	0	0	0	0	0	0	0
ENSG00000050628	PTGER3	17.6	24.1	18.5	29.3	50.6	14.6	9.3	4.5	0	0	2.6	0	0	0	2.4	0	221.6	0	0	0	0	0	0	0	0	0	103.9	5.3	0	0	0	0	0	0	0	0	0	40.3
ENSG00000235782	AL031429.1	0	0	0	14	0	26.3	0	0	0	0	0	0	0	0	0	0	0	0	0	0	0	0	0	0	0	0	0	0	0	0	0	0	0	0	0	0	0	0
ENSG00000269933	AL031429.2	0	1.5	0	2.7	0	0	0	0	0	0	0	0	0	0	0	0	0	0	0	0	0	0	0	0	0	0	0	0	0	0	0	0	0	0	0	0	0	0
ENSG00000132485	ZRANB2	149	104.6	141.9	158	126.5	154.8	102.3	91.2	131.9	166.4	121.1	131.6	187.2	12.2	197.3	259.2	209.8	0	74.9	0	63	207	32.8	0	312.1	11.3	144.6	31.6	34.9	168.9	281.8	145.3	53.8	0	0	64.4	60.2	80.5
ENSG00000229956	ZRANB2-AS2	2.7	0	5	0	0	0	1.3	6	1.3	1.8	0	0	0	0	0	0	0	0	0	0	0	0	0	0	0	0	0	0	0	0	0	0	0	0	0	0	0	0
ENSG00000172260	NEGR1	47.4	83.3	70.3	33.3	34	61.3	0	1.5	5.2	8.9	1.3	19.3	50.3	0	12	86.8	102.6	3.6	0	3	0	0	0	0	0	0	0	0	0.7	17	0	0	0	61.1	0	0	0	0
ENSG00000233994	GDI2P2	0	0	0.7	0	0	0	0	0	0	0	0	0	0	0	0	0	0	0	0	0	0	0	0	0	0	0	0	0	0	0	0	0	0	0	0	0	0	0
ENSG00000227207	RPL31P12	425.5	408.7	564.9	523.4	491.5	628.8	322.8	345.5	298.7	345.2	311.1	266.5	130	470.5	422.1	308.8	516.3	3.6	515.5	154.8	59.8	383.7	21.9	0	719.1	1091.5	710.6	290	620.6	253.2	864.6	203.5	0	61.1	606.7	0	0	201.4
ENSG00000225087	AL583808.1	0	0	0	0	0	0	0	0	2.6	0	0	0	0	0	0	0	0	0	0	0	0	0	0	0	0	0	0	0	0	0	0	0	0	0	0	0	0	0
ENSG00000162620	LRRIQ3	0	2.2	0	0	0	0	0	0	0	0	1.3	3.4	393.5	0	0	0	2.4	0	0	0	0	0	0	0	0	0	0	0	0	0	0	0	0	0	0	0	0	0
ENSG00000254685	FPGT	11.5	11.7	11.4	5.3	14.5	5.8	9.3	19.4	22	1.8	3.8	9.1	0	0	0	0	0	0	0	0	0	0	0	0	151.2	0	0	0	60.6	0	4.8	32.6	0	61.1	0	0	0	0
ENSG00000259030	FPGT-TNNI3K	0	4.4	5	2	0	0	0	0	1.3	0	0	0	0	0	7.2	11.2	0	0	0	0	0	0	0	0	0	0	0	0	0	0	0	0	0	0	0	0	0	0
ENSG00000178965	ERICH3	2.7	0	0	0.7	0	0	0	0	0	2.7	0	0	0	0	0	0	0	0	0	0	0	0	0	0	0	0	0	0	0	0	0	0	0	0	0	0	0	0
ENSG00000116791	CRYZ	27.8	34.4	9.9	12.7	6.5	19.7	35.9	56.8	47.8	36.5	30.6	22.7	0	0	0	0	4.7	0	0	0	0	0	0	119.8	1.6	60.4	4.3	0	67	2.3	0	0.4	0	0	0	0	60.2	0
ENSG00000162623	TYW3	26.4	22.7	27.7	13.3	27.5	8	41.2	23.9	18.1	32.9	19.1	5.7	0	4.1	0	53.3	0	0	0	0	185.8	0	21.9	0	0	0	59.7	0	29.2	30.2	65.3	16.3	0	0	0	0	0	0
ENSG00000229943	AC133865.1	0	0	0	0	0	0	0	10.5	0	0	0	0	0	0	0	0	0	0	0	0	0	0	0	0	0	0	0	0	0	0	0	0	0	0	0	0	0	0
ENSG00000261213	AC099786.3	0	0	0	0	0	0	0	0	0	0	1.3	4.5	0	0	0	0	0	0	0	0	0	0	0	0	0	0	0	0	0	0	0	0	0	0	0	0	0	0
ENSG00000162624	LHX8	0	0	0	0.7	0	0	79.7	137.6	121.5	60.5	132.6	99.8	0	4.1	0	0	0	0	0	0	0	0	0	174.3	0	0	0	0	0	56.2	0	77.1	0	61.1	0	0	0	0
ENSG00000224149	AC099786.2	0	0	0	0	0	0	0	0	0	0	2.6	0	0	0	0	0	0	0	0	0	0	0	0	0	0	0	0	0	0	0	0	0	0	0	0	0	0	0
ENSG00000137968	SLC44A5	0	0	0	0	0	0	0	3	1.3	1.8	0	5.7	0	0	0	0	0	0	0	0	0	0	0	0	0	0	0	0	0	0	0	0	0	0	0	0	0	0
ENSG00000213579	AL096829.1	0	8.8	0	0	8	0	0	0	0	0.9	0	0	154.3	0	0	0	1.2	68.3	0	409.7	0	0	21.9	0	0	0	1.7	0	7.8	4.6	0	0	0	61.1	0	0	0	0
ENSG00000117054	ACADM	55.6	63.6	52.5	67.3	78.8	55.5	43.8	62.8	32.3	54.3	34.4	37.4	74.5	4.1	70.5	23.6	38.9	0	0	0	148	0	0	0	3.2	7.6	124.6	0	121.1	29.6	55.7	125.3	53.8	0	0	0	0	0
ENSG00000137955	RABGGTB	42	33.6	27	25.3	22.4	34.3	29.2	25.4	50.4	46.3	34.4	49.9	0	0	0	0	0	0	61.7	0	0	0	0	0	130.3	15.1	90	5.3	72	8.6	183.1	0.7	0	0	0	450.7	0	0
ENSG00000184005	ST6GALNAC3	0	1.5	0	0	0	0	0	0	0	0	1.3	0	0	0	0	0	0	0	0	0	0	0	0	0	0	0	0	0	0	0	0	0	0	0	0	0	0	0
ENSG00000117069	ST6GALNAC5	0	11	4.3	0	0	0	0	7.5	3.9	14.2	16.6	2.3	0	0	0	0	0	0	0	0	0	0	0	0	0	0	0	0	0	0	0	0	0	0	0	0	0	0
ENSG00000142892	PIGK	31.8	46.1	46.8	24	21.7	32.9	53.1	20.9	25.9	27.6	19.1	55.6	0	0	31.1	69.4	0	61.1	110.2	91	0	0	10.9	0	154.4	7.6	9.5	0	37.1	23.5	1.6	0.7	0	0	0	0	60.2	0
ENSG00000226084	AC113935.1	0	0	0	0.7	4.3	0	0	0	0	0	0	0	0	0	0	0	0	0	0	0	0	0	0	0	0	0	0	0	1.4	0.2	0	0	0	0	0	0	0	0
ENSG00000228187	AC093433.1	13.5	11.7	2.1	0	0	0	0	0	0	2.7	0	0	0	0	0	0	0	0	0	0	0	0	0	0	0	0	0	0	0	0	0	0	0	0	0	0	0	0
ENSG00000154027	AK5	0	10.2	0	0	0	0	0	0	0	0	0	6.8	0	0	0	0	17.7	0	0	0	0	0	0	0	0	0	0	0	15.7	0	0	0.4	0	0	0	0	0	0
ENSG00000036549	ZZZ3	94.8	68.7	69.5	110	73	111.7	53.1	25.4	50.4	56.9	38.3	45.4	0	0	32.3	58.3	120.2	165.3	0	0	3.1	111.1	10.9	0	1.6	3.8	51.1	0	177.4	19.9	79.6	11.1	0	61.1	0	0	0	0
ENSG00000251785	RNA5SP20	0	0	0	0	0	0	0	0	0	0	3.8	0	0	0	0	0	0	0	0	0	0	0	0	0	0	0	0	0	0	0	0	0	0	0	0	0	0	0
ENSG00000077254	USP33	43.4	62.1	38.3	36	23.1	41.6	29.2	3	46.5	24.9	44.6	22.7	0	348.8	40.7	244.3	53	168.9	63.9	139.6	0	0	32.8	168.9	0	7.6	64.9	5.3	165.3	27.5	0	30.4	0	61.1	0	0	0	40.3
ENSG00000180488	MIGA1	29.8	3.7	18.5	30.7	29.6	19	58.4	65.8	91.8	33.8	59.9	79.4	1.7	20.3	16.7	47.1	62.5	0	0	6.1	494.4	0	0	0	0	7.6	35.5	0	12.8	86.6	0	4.4	0	0	0	0	60.2	40.3
ENSG00000219201	AC138392.1	0	0	1.4	0	2.2	9.5	0	0	0	3.6	1.3	2.3	0	0	0	0	0	0	0	0	0	0	0	0	0	0	0	0	0	0	0	0	0	0	0	0	0	0
ENSG00000235613	NSRP1P1	41.3	87.7	100.1	92.7	122.2	102.2	159.4	166	209.5	169	258.9	246.1	76.3	28.4	65.8	161.2	123.8	506.6	0	3	3.1	0	1946	310.5	66	0	226.8	0	107.6	199.7	93.9	146.8	0	0	67.4	0	0	120.8
ENSG00000235927	NEXN-AS1	0	0	2.1	0	0	0	0	0	0	4.4	0	0	0	0	0	0	0	0	0	0	0	0	0	0	0	0	0	0	0	0	0	0	0	0	0	0	0	0
ENSG00000162614	NEXN	20.3	20.5	29.1	24.7	15.9	66.5	33.2	13.5	33.6	14.2	6.4	15.9	188.9	4.1	205.7	17.4	9.4	0	70.5	0	0	550.4	10.9	0	0	7.6	0.9	0	69.1	17.6	0	89.3	0	0	0	0	0	40.3
ENSG00000162613	FUBP1	92.1	108.9	150.4	144	57.1	126.3	114.2	56.8	112.5	118.3	114.8	88.5	0	85.2	0	0	142.6	0	0	0	3.1	247.4	262.4	0	70.8	7.6	134.2	5.3	142.5	105.7	0	127.9	0	0	0	0	0	40.3
ENSG00000162616	DNAJB4	5.4	50.4	12.8	5.3	0.7	21.2	5.3	16.5	6.5	7.1	2.6	7.9	0	4.1	143.5	0	241.6	0	0	0	0	0	0	0	0	0	0	0	0	4.4	0	0	0	0	0	64.4	0	40.3
ENSG00000137960	GIPC2	17.6	0.7	5	2.7	8.7	0	0	0	0	0	0	0	0	4.1	0	6.2	147.3	0	163	0	0	0	0	0	0	0	0.9	0	0	0	0	0	0	0	0	0	0	40.3
ENSG00000273338	AC103591.3	2.7	19.7	2.1	4	27.5	0.7	8	15	14.2	4.4	0	7.9	57.2	0	0	0	0	0	0	0	0	0	10.9	10.9	138.4	0	90.9	0	7.1	13.8	0	0	0	0	0	0	0	40.3
ENSG00000213561	AC103591.2	0	0	0	0	2.2	0	0	0	2.6	2.7	0	0	0	0	0	0	0	0	0	0	0	0	0	0	0	0	0	0	0	0	0	0	0	0	0	0	0	0
ENSG00000213560	AC103591.1	0	0	0.7	3.3	0	0	0	4.5	0	0	0	11.3	0	0	0	0	0	0	0	0	0	0	0	0	0	0	0	0	0	6.5	0	0	0	0	0	0	0	0
ENSG00000202263	RNA5SP22	0	0	0	0.7	0	0	0	0	0	0	0	0	0	0	0	0	0	0	0	0	0	0	0	0	0	0	0	0	0	0	0	0	0	0	0	0	0	0
ENSG00000237413	MGC27382	0.7	2.9	0	0	0	1.5	0	0	0	0	0	3.4	0	0	0	0	0	0	0	0	0	0	0	0	0	0	0	0	14.3	1	0	0	0	0	0	0	0	0
ENSG00000122420	PTGFR	35.2	43.9	22	26	26	31.4	0	0	0	0	0	0	1.7	4.1	12	52.1	58.9	0	0	0	0	252.5	0	98	0	0	0	0	0	12.6	0	0	0	0	0	0	0	0
ENSG00000137959	IFI44L	112.5	125.8	152.6	164	68.7	88.4	115.6	91.2	85.3	124.6	57.4	112.3	329.3	219	120.8	277.8	191	107.8	116.8	458.3	56.7	5	10.9	0	69.2	0	118.6	0	1.4	62.5	4.8	118.6	53.8	0	0	0	0	80.5
ENSG00000137965	IFI44	105	138.2	129.2	185.4	84.6	163.6	139.5	86.8	186.2	146.8	86.7	64.6	147.3	8.1	352.7	28.5	90.8	0	193.9	452.2	264.5	5	21.9	130.7	268.7	90.6	45.9	537.9	192.4	52.7	41.4	64.1	53.8	0	0	0	0	0
ENSG00000238015	AC104837.2	0	0	0.7	0	0	1.5	0	3	1.3	0	2.6	5.7	0	0	1.2	0	2.4	0	0	0	9.4	0	0	0	0	3.8	2.6	0	0	5	4.8	3	0	0	0	0	0	0
ENSG00000235400	AC104837.1	0.7	2.2	3.5	8	0.7	3.7	0	1.5	3.9	3.6	3.8	4.5	0	0	0	48.4	0	0	0	0	0	0	0	0	54.7	41.5	26	0	0	4.8	0	3.7	0	0	0	0	0	0
ENSG00000162618	ADGRL4	31.8	60	65.3	38.7	81.7	46.7	4	0	11.6	9.8	10.2	23.8	3.5	385.4	194.9	71.9	136.7	377.3	288.6	0	135.4	0	21.9	996.8	0	3.8	152.3	137.1	0.7	39.9	0	40	0	61.1	0	0	0	40.3
ENSG00000232676	ADH5P2	0	0	0	0	0	0	0	0	2.6	0	0	0	0	0	0	0	0	0	0	0	0	0	0	0	0	0	0	0	0	0	0	0	0	0	0	0	0	0
ENSG00000235756	AC098657.1	0	0	0	0	1.4	0	0	0	0	0	0	0	0	0	0	0	0	0	0	0	0	0	0	0	0	0	0	0	0	0.2	0	0	0	0	0	0	0	0
ENSG00000225598	AL606519.1	0	0	0	0	0	0	0	0	0	4.4	0	0	0	0	0	0	0	0	0	0	0	0	0	0	0	0	0	0	0	0	0	0	0	0	0	0	0	0
ENSG00000234184	LINC01781	0	0	3.5	0.7	0	0	0	0	1.3	4.4	0	0	1.7	0	0	0	0	0	0	0	0	0	0	196.1	0	0	0	0	0	0	0	0	0	0	0	0	0	0
ENSG00000235089	AL357632.1	53.5	127.2	73.1	90	96.9	68.6	132.8	155.6	148.7	143.2	114.8	145.2	5.2	8.1	87.3	105.4	53	158.1	127.8	0	85	0	21.9	98	148	203.9	62.3	0	152.5	192.8	0	154.2	53.8	0	0	0	0	2054
ENSG00000117114	ADGRL2	12.2	16.8	5	11.3	37.6	29.9	5.3	7.5	11.6	3.6	3.8	15.9	117.9	0	52.6	1.2	0	0	191.7	0	0	0	0	0	0	3.8	0	0	27.8	0	0	0	0	0	0	0	0	0
ENSG00000234683	AL138799.3	2	0	7.1	1.3	0.7	2.2	0	6	0	0	1.3	0	39.9	0	1.2	0	0	3.6	0	3	0	0	0	0	3.2	3.8	0	58	0.7	0.6	0	2.2	0	0	0	0	0	0
ENSG00000215875	ST13P20	0	0	0	0	0	0	0	0	0	0	1.3	7.9	0	0	0	1.2	0	0	0	6.1	0	5	0	0	0	0	0.9	0	0	0.2	0	0	0	0	0	0	0	0
ENSG00000236268	LINC01361	0	0	0	0.7	0	0	2.7	0	0	0	0	0	0	0	0	0	0	0	0	0	0	0	0	0	0	0	0	0	0	0	0	6.7	0	0	0	0	0	0
ENSG00000233008	LINC01725	0	0	0	0.7	0	0	0	0	0	0	0	0	0	0	0	0	0	0	0	0	0	0	0	0	0	0	0	0	0	0	0	0	0	0	0	0	0	0
ENSG00000137941	TTLL7	0	0	3.5	4.7	22.4	0	6.6	38.9	11.6	11.6	23	11.3	0	0	0	9.9	0	0	0	3	0	0	0	0	1.6	128.4	0	0	0	25.4	0	0	0	0	0	0	0	0
ENSG00000271576	AL359504.2	0.7	4.4	0	2	0	0	0	0	0	0	3.8	5.7	0	0	4.8	182.3	0	0	0	0	0	0	10.9	0	0	0	0	0	0	0	0	0	0	0	0	0	0	0
ENSG00000142875	PRKACB	76.6	45.3	56.8	77.3	49.2	84	34.5	32.9	41.4	49.8	35.7	20.4	0	166.3	0	117.8	15.3	0	136.6	370.3	239.3	0	10.9	0	234.9	11.3	149.7	416.6	0.7	28.9	6.4	0.4	0	0	0	0	0	0
ENSG00000213540	AL359504.1	0	0	0	0	18.8	0	0	0	0	0	0	1.1	0	0	0	0	0	0	0	0	0	0	0	0	0	0	0	0	0	0	0	0	0	0	0	0	0	0
ENSG00000199959	SNORA2	0	0	1.4	0	0	0	1.3	16.5	0	0	0	0	0	0	0	0	0	0	0	0	0	0	0	0	0	0	0	0	0	0	0	0	0	0	0	0	0	0
ENSG00000203943	SAMD13	0	0	0	0	0	0	0	0	0	6.2	0	1.1	0	0	0	0	0	0	0	0	0	0	0	0	0	0	0	0	0	0	0	0.7	0	0	0	0	0	0
ENSG00000240520	UOX	0	0	0	13.3	0	0	0	9	0	6.2	0	4.5	0	0	0	0	0	0	0	0	0	0	0	0	0	0	0	0	0	0	0	0.4	0	0	0	0	0	0
ENSG00000137976	DNASE2B	5.4	15.4	14.2	17.3	12.3	0	0	0	0	0	0	0	0	0	0	0	0	0	0	0	0	0	0	0	0	0	39	0	0	13.6	0	41.9	0	61.1	0	0	0	80.5
ENSG00000117133	RPF1	24.4	10.2	34.8	15.3	43.4	60.6	38.5	52.4	36.2	47.2	33.2	43.1	1.7	8.1	0	0	50.7	0	0	0	0	5	0	5.4	82.1	3.8	88.3	0	0	43.8	68.5	28.5	3283.6	61.1	0	0	0	40.3
ENSG00000174021	GNG5	27.1	24.1	27	37.3	52	34.3	27.9	32.9	36.2	25.8	19.1	28.4	0	109.5	0	49.6	0	0	0	0	0	5	0	114.4	146.4	192.6	37.2	0	0	31.3	74.8	14.1	0	0	0	0	0	0
ENSG00000122432	SPATA1	0	0.7	0	3.3	0	16.1	0	0	5.2	0.9	1.3	0	0	4.1	0	0	0	0	0	273.1	0	0	10.9	70.8	0	0	0	0	0	0	0	0	0	0	0	0	0	0
ENSG00000117151	CTBS	56.9	73.8	17	50.7	34	78.1	14.6	9	15.5	37.4	2.6	10.2	0	0	282.2	22.3	0	3.6	55.1	0	0	0	0	0	88.5	3.8	0	0	36.3	10.7	0	37.4	107.7	0	0	64.4	0	40.3
ENSG00000117155	SSX2IP	23.7	4.4	19.9	0	0.7	5.1	17.3	22.4	31	14.2	15.3	10.2	0	0	0	0	0	0	0	0	0	0	0	0	168.9	90.6	0	0	0	19.1	0	0	0	0	0	0	0	0
ENSG00000171517	LPAR3	0	0	3.5	4	0	0	1.3	9	9.1	2.7	5.1	13.6	0	0	0	0	0	0	0	0	0	0	0	0	0	0	0	0	0	2.3	0	33.4	0	61.1	0	0	0	0
ENSG00000153898	MCOLN2	21.7	30	31.2	24	23.9	27	5.3	19.4	0	20.5	1.3	12.5	0	0	0	0	0	0	0	0	0	0	0	0	24.1	0	6.9	0	0	14.7	55.7	0	0	0	0	0	0	0
ENSG00000162643	WDR63	0	0.7	0	0	0	0	0	0	0	0	0	0	0	0	0	0	0	0	0	0	34.6	0	0	0	0	0	0	0	0	0	0	0	0	0	0	0	0	0
ENSG00000055732	MCOLN3	45.4	43.9	15.6	19.3	10.1	10.2	10.6	16.5	0	0	1.3	5.7	0	0	0	0	0	0	0	0	0	999.8	0	0	212.4	0	0	0	0	0.2	28.7	33.4	0	0	0	0	0	0
ENSG00000280099	AL603750.1	0	0.7	0	0	0	0	9.3	29.9	19.4	11.6	7.7	28.4	0	4.1	0	0	0	0	0	0	0	0	0	0	0	0	0	0	0	48	0	57.5	0	0	0	0	0	0
ENSG00000097096	SYDE2	0	0	2.8	0	0	0	0	7.5	20.7	15.1	10.2	10.2	0	0	0	0	0	0	0	0	0	0	0	0	22.5	0	0	0	0	15.1	0	23	0	0	0	0	0	0
ENSG00000162642	C1orf52	42.7	38.8	38.3	20	0.7	20.4	9.3	44.9	14.2	17.8	16.6	1.1	3.5	4.1	53.8	0	46	3.6	0	0	0	0	0	76.3	0	26.4	1.7	0	1.4	22.9	70.1	41.5	0	0	0	0	0	0
ENSG00000142867	BCL10	20.3	48.3	23.4	16.7	18.8	34.3	18.6	16.5	36.2	8.9	19.1	18.1	26	0	46.6	0	0	86.2	35.2	0	0	0	0	5.4	0	11.3	46.7	0	0.7	24.5	0	0.4	0	0	0	0	0	40.3
ENSG00000223653	AL078459.1	0.7	0	0	0.7	1.4	0	4	0	0	2.7	1.3	0	0	0	0	0	0	0	0	0	0	0	0	0	0	0	0	0	0	0	0	4.8	0	0	0	0	0	0
ENSG00000153904	DDAH1	2.7	3.7	1.4	12.7	0	0	23.9	20.9	55.6	45.4	37	74.9	1.7	8.1	0	0	0	0	0	0	0	0	0	0	17.7	253	0	0	17.1	52.2	0	73.8	0	0	67.4	0	0	0
ENSG00000282057	AC092807.3	0	0	2.1	1.3	8.7	0	0	0	1.3	0.9	2.6	0	0	0	0	0	0	0	2.2	0	0	0	0	0	0	0	0	5.3	0	0	117.8	0	0	0	0	0	0	0
ENSG00000272691	AC092807.2	0	0	6.4	0	0	0	0	3	5.2	3.6	0	0	1.7	0	0	0	0	0	0	0	0	0	0	5.4	0	0	0	0	35.6	0	0	0	0	0	0	0	0	0
ENSG00000142871	CYR61	1384.8	1810.3	1364.7	1476.3	1596	1771	171.4	151.1	112.5	211.7	59.9	170.1	2208.4	2462.2	936.2	810.9	1103.3	301.8	2553.4	512.9	346.4	1757.1	32.8	457.6	209.1	26.4	323.7	421.8	397.6	216.9	757.9	133.8	53.8	366.9	0	64.4	120.5	281.9
ENSG00000199934	SNORD81	21	19	19.2	16.7	10.1	39.4	39.9	28.4	29.7	9.8	30.6	21.5	0	0	29.9	5	0	0	15.4	36.4	0	0	10.9	27.2	14.5	0	20.8	0	9.3	2.5	105.1	3	0	0	0	0	0	40.3
ENSG00000117174	ZNHIT6	20.3	38	21.3	35.3	57.1	11	63.8	65.8	37.5	33.8	35.7	51	41.6	4.1	46.6	0	221.6	0	0	0	0	0	0	87.2	0	313.5	2.6	0	11.4	55.6	108.3	36	0	0	0	0	60.2	0
ENSG00000171502	COL24A1	11.5	5.1	4.3	6.7	1.4	0	0	0	5.2	2.7	0	0	0	0	0	0	0	0	0	0	0	0	0	0	0	3.8	0	0	96.9	0	0	0.4	0	0	0	0	0	40.3
ENSG00000201620	RNA5SP51	0.7	0	0	0	0	0	0	0	0	0	0	0	0	0	0	0	0	0	0	0	0	0	0	0	0	0	0	0	0	0	0	0	0	0	0	0	0	0
ENSG00000122417	ODF2L	6.8	10.2	5	17.3	18.1	35.8	21.3	29.9	55.6	22.2	12.8	35.2	0	0	0	142.6	0	402.4	0	188.2	0	0	10.9	0	64.4	0	0.9	0	104	11.5	0	0.4	0	0	0	0	0	0
ENSG00000137975	CLCA2	4.7	2.2	0.7	4.7	8.7	0	58.4	161.5	85.3	256.2	103.3	175.8	3.5	4.1	0	0	0	0	0	0	0	0	0	0	8	0	2.6	0	12.1	105.3	0	31.5	0	0	0	0	0	40.3
ENSG00000153923	CLCA3P	0	0	0	0	0	0	0	0	0	0	0	0	0	0	0	0	0	0	0	0	0	0	0	0	0	0	0	0	0	0.6	0	0	0	0	0	0	0	0
ENSG00000261737	AL049597.2	0	17.5	5	0	0	5.8	0	0	6.5	0.9	5.1	0	0	0	61	0	0	0	0	0	3.1	0	0	0	0	0	15.6	0	0	5.5	0	0	0	0	0	0	0	0
ENSG00000097033	SH3GLB1	163.3	80.4	69.5	33.3	54.2	48.2	93	22.4	49.1	60.5	51	52.2	0	85.2	233.2	124	331.2	0	2.2	282.2	3.1	0	21.9	294.1	0	3.8	113.4	432.4	37.8	56.8	6.4	80.1	53.8	0	0	64.4	0	40.3
ENSG00000230721	AL049597.1	7.5	5.1	6.4	8	2.9	7.3	4	1.5	3.9	5.3	3.8	2.3	0	12.2	1.2	5	25.9	3.6	6.6	6.1	0	5	10.9	5.4	0	18.9	8.7	0	11.4	5.2	4.8	5.6	0	0	0	0	0	40.3
ENSG00000183291	SELENOF	175.5	182.8	200.8	135.4	190.1	175.3	160.7	80.8	184.9	197.5	187.5	166.7	154.3	292.1	220	238.1	234.6	517.4	517.7	33.4	85	15.1	21.9	190.7	3.2	158.6	81.4	126.6	42.8	151.7	280.2	88.2	107.7	0	67.4	128.8	0	40.3
ENSG00000153936	HS2ST1	52.8	62.9	53.9	50.7	101.9	44.5	27.9	52.4	34.9	15.1	44.6	53.3	187.2	255.5	1.2	341	0	488.6	0	42.5	182.7	35.3	21.9	0	6.4	3.8	26	0	5.7	37.1	0	9.6	0	0	0	0	0	0
ENSG00000235251	AC093155.2	0	0	0	0	0	0	6.6	6	0	0	1.3	0	0	0	0	0	0	0	0	0	0	0	0	0	0	0	0	0	0	0	0	0	0	0	0	0	0	0
ENSG00000267272	LINC01140	0	0	6.4	0	0	0	0	0	0	0	0	0	0	0	0	0	0	0	147.6	0	0	0	0	0	0	0	0	0	0	0	0	0	0	0	0	0	0	0
ENSG00000143013	LMO4	262.9	244.9	193	176.7	297.8	325.7	139.5	127.1	120.2	184.2	178.5	164.5	91.9	69	135.1	228.2	346.6	786.9	257.8	133.5	119.7	146.4	10.9	228.8	175.4	30.2	187.8	174	153.2	115	8	261	0	61.1	4988.2	0	60.2	80.5
ENSG00000065243	PKN2	10.2	40.9	87.3	46.7	15.9	51.9	53.1	16.5	38.8	45.4	28.1	34	1.7	12.2	0	0	168.6	0	0	0	0	0	0	54.5	41.8	0	53.7	0	154.6	35.7	4.8	86.4	0	0	0	0	0	40.3
ENSG00000241975	ELOCP19	4.1	0	0.7	0	0	0	0	0	0	0	0	0	0	0	0	0	0	0	0	0	0	0	0	0	0	0	0	0	0	0	0	0	0	0	0	0	0	0
ENSG00000137947	GTF2B	7.5	30.7	9.9	14	17.3	17.5	23.9	23.9	7.8	31.1	11.5	26.1	0	4.1	273.8	1.2	0	0	0	0	0	0	0	0	0	0	91.8	0	0	25	0	0.4	0	0	0	0	0	0
ENSG00000137944	KYAT3	9.5	4.4	20.6	17.3	0	13.1	12	17.9	12.9	1.8	16.6	19.3	0	4.1	0	0	0	0	2.2	0	0	0	0	0	0	0	0.9	0	0	5.7	0	0	0	0	0	0	0	0
ENSG00000213516	RBMXL1	12.2	46.8	55.4	48	41.9	19	59.8	55.3	24.6	32.9	35.7	49.9	0	0	12	36	20	0	96.9	88	3.1	0	251.5	0	99.7	3.8	97.8	0	0	94.8	1.6	69	0	61.1	0	0	3914.7	0
ENSG00000117226	GBP3	23	62.9	27	28.7	15.2	19.7	50.5	40.4	33.6	58.7	28.1	61.2	1.7	0	1.2	0	0	0	77.1	0	0	0	0	310.5	57.9	0	24.2	0	0	14.3	100.3	91.2	0	0	0	0	0	0
ENSG00000117228	GBP1	56.9	64.3	85.9	86.7	101.2	106.6	82.4	74.8	58.2	169	61.2	57.8	0	44.6	124.4	2.5	0	323.4	0	0	6.3	0	0	0	94.9	3.8	182.6	0	0	58.9	146.5	83	0	61.1	0	0	0	40.3
ENSG00000234518	PTGES3P1	0	5.1	24.8	16.7	0	0	4	12	28.4	8.9	37	0	0	0	0	129	0	0	0	0	0	0	0	0	0	0	0	0	0	4	0	15.6	0	0	0	0	0	0
ENSG00000162645	GBP2	49.5	122.1	62.5	52	105.5	57.7	99.6	182.5	112.5	223.3	137.7	132.7	0	125.7	59.8	124	9.4	3.6	147.6	0	63	5	1366.6	0	255.8	3.8	120.3	0	54.9	100.7	143.3	129.8	107.7	0	0	0	0	0
ENSG00000162654	GBP4	16.3	36.6	31.9	23.3	12.3	8.8	21.3	50.9	10.3	89.9	2.6	19.3	0	0	0	22.3	73.1	0	0	0	0	0	0	5.4	0	0	54.5	0	0	1.5	11.1	30	0	0	0	0	0	0
ENSG00000154451	GBP5	8.8	30	22	21.3	18.8	28.5	0	10.5	1.3	8	7.7	3.4	1.7	4.1	0	0	0	3.6	0	0	0	1535	0	0	1.6	0	77.9	0	3.6	13.8	0	30.4	0	0	0	0	0	120.8
ENSG00000183347	GBP6	0	0	0	0	0	0	0	0	0	0	2.6	4.5	0	0	0	0	0	0	0	0	0	0	0	0	0	0	0	0	0	0	0	0	0	0	0	0	0	0
ENSG00000225492	GBP1P1	54.9	57.8	48.3	34.7	28.2	33.6	35.9	20.9	19.4	69.4	39.5	40.8	0	12.2	31.1	74.4	0	0	0	0	0	0	0	0	32.2	0	78.8	0	0	35.9	0	0	0	61.1	0	0	0	0
ENSG00000197147	LRRC8B	0.7	13.9	18.5	9.3	28.9	5.1	31.9	19.4	15.5	23.1	11.5	20.4	195.9	4.1	37.1	9.9	0	0	0	0	0	0	65.6	0	8	0	0	0	0.7	24.3	0	0	0	0	0	0	0	0
ENSG00000230735	AC093423.2	0	0	0	0	0	0	1.3	0	0	0	0	1.1	0	0	0	0	0	0	0	0	0	0	0	0	0	0	0	0	0	0.8	0	0	0	0	0	0	0	0
ENSG00000171488	LRRC8C	31.2	15.4	39	29.3	39	62.1	1.3	1.5	7.8	2.7	0	9.1	0	0	2.4	37.2	47.2	212	306.2	0	0	0	0	0	1.6	0	39	0	0.7	7.8	0	3	0	0	0	0	0	0
ENSG00000231613	AC099568.1	0	0	0	0	0	0	0	0	2.6	0	0	0	0	113.6	0	0	0	0	0	0	0	0	0	0	0	0	0	0	0	0	0	0	0	0	0	0	0	0
ENSG00000272931	AC099568.2	4.7	11	0	0	0	0	0	0	2.6	0.9	0	2.3	0	0	0	0	0	0	0	0	0	0	0	0	0	0	0	0	0	0	0	0	0	0	0	0	0	0
ENSG00000171492	LRRC8D	49.5	28.5	17	40	23.1	32.1	12	15	28.4	18.7	15.3	37.4	0	4.1	10.8	57	0	265.9	0	0	56.7	0	10.9	0	1.6	3.8	36.4	0	29.9	15.9	0	27.1	0	0	0	0	0	0
ENSG00000228175	GEMIN8P4	0	0	0	2	0	0	0	0	2.6	0	0	0	0	0	0	0	0	0	0	0	0	0	0	0	0	0	0	0	0	0	0	0	0	0	0	0	0	0
ENSG00000162664	ZNF326	13.5	31.4	13.5	26.7	5.8	21.9	23.9	25.4	22	17.8	26.8	30.6	3.5	64.9	94.5	0	25.9	0	0	0	0	0	0	179.8	66	0	5.2	0	0	8	74.8	83.4	0	0	0	0	0	0
ENSG00000199666	SNORD3G	0	0	0	0	0	0	0	0	0	2.7	0	1.1	0	0	14.3	0	0	0	0	0	0	0	0	0	0	0	0	0	0	0	0	0	0	0	0	0	0	0
ENSG00000233593	AL590094.1	32.5	0	0	0.7	0	0	0	0	1.3	6.2	1.3	0	0	0	0	0	0	0	0	0	0	0	10.9	0	0	0	0	0	0	0	0	0.4	0	0	0	0	0	0
ENSG00000122482	ZNF644	42	16.8	37.6	71.3	51.3	19.7	66.4	50.9	53	72.1	84.2	78.3	1.7	4.1	136.3	0	46	122.2	0	494.7	0	0	153.1	0	74	196.4	69.2	5.3	59.9	81.6	173.6	90.8	0	61.1	67.4	0	0	40.3
ENSG00000215873	FEN1P1	0	0	0	0	0	0	0	0	0	0	0	0	0	0	0	0	0	0	0	0	0	0	0	0	0	0	0	0	0	0	9.6	0	0	0	0	0	0	0
ENSG00000097046	CDC7	14.9	0	0	0	15.9	21.2	4	3	10.3	9.8	10.2	0	0	0	0	0	0	0	0	0	0	0	0	0	0	0	73.6	0	0	17	0	0	0	0	0	0	0	0
ENSG00000203914	HSP90B3P	34.6	51.2	41.9	36	19.5	16.8	81	70.3	84	62.3	114.8	130.4	5.2	170.4	0	8.7	3.5	129.3	0	6.1	3.1	0	0	0	43.4	0	96.9	0	32.1	34.8	1.6	53.4	0	0	0	0	0	80.5
ENSG00000069702	TGFBR3	17.6	17.5	36.2	18	26	43.8	4	0	3.9	5.3	0	0	0	559.8	72.9	225.7	2.4	190.4	418.6	685.9	0	5	10.9	0	4.8	0	39.8	0	98.3	1	1.6	0	0	0	0	0	0	40.3
ENSG00000137948	BRDT	0	0	0	0	0	0	0	0	0	0	0	0	0	0	0	0	0	0	0	0	0	0	0	0	0	0	0	0	0	0	0	0.4	0	0	0	0	0	0
ENSG00000172031	EPHX4	0	0	0	0	0	0	0	0	0	0.9	0	0	0	0	0	0	0	0	0	0	0	0	0	0	0	0	0	0	0	0	0	0	0	0	0	0	0	0
ENSG00000230667	SETSIP	0.7	4.4	8.5	9.3	0	10.2	6.6	1.5	12.9	8	7.7	4.5	0	0	57.4	0	0	0	0	0	15.7	0	0	0	9.7	0	0	0	0	9.2	52.5	0	0	0	0	0	0	0
ENSG00000284413	BTBD8	0	0	0	5.3	9.4	0	0	0	0	0	0	0	0	0	0	0	0	0	0	0	0	0	0	0	0	0	0	0	0	0	0	0	0	0	0	0	0	0
ENSG00000233401	PRKAR1AP1	0	0	0	0	0	0	1.3	0	0	0	0	0	0	0	0	0	0	0	0	0	0	0	0	0	0	0	0	0	0	0	0	0	0	0	0	0	0	0
ENSG00000273487	AC104836.2	0	0.7	0	2	0	0	0	20.9	0	3.6	0	0	0	0	0	0	0	0	0	0	0	0	0	0	0	0	0	0	0	0	0	0	0	0	0	0	0	0
ENSG00000233125	ACTBP12	1.4	0	0	0	0	0	0	0	0	0	0	0	0	0	0	0	0	0	0	0	0	0	0	0	0	0	0	0	0	0.2	0	0	0	0	0	0	0	0
ENSG00000174842	GLMN	21.7	28.5	14.2	4.7	19.5	2.9	21.3	4.5	20.7	21.4	21.7	12.5	0	0	0	0	0	0	0	0	0	0	0	0	0	0	0.9	0	0	26	0	0	0	0	0	0	0	0
ENSG00000122484	RPAP2	0	21.9	29.8	35.3	13.7	24.1	33.2	17.9	15.5	35.6	29.3	17	1.7	8.1	0	0	0	3.6	41.9	0	18.9	5	0	0	0	3.8	10.4	110.7	16.4	27.7	0	1.1	0	0	0	0	0	40.3
ENSG00000162676	GFI1	6.8	27.1	9.9	11.3	41.2	0	1.3	0	0	0	0	0	0	0	0	0	0	0	0	0	0	0	0	0	0	0	0	5.3	0	6.7	460.2	0	0	0	0	0	0	0
ENSG00000067208	EVI5	32.5	53.4	23.4	18	2.2	23.4	30.6	22.4	18.1	27.6	11.5	14.7	0	0	300.1	122.8	28.3	467.1	0	0	31.5	0	0	0	0	3.8	16.4	0	41.3	17.2	0	0	0	0	0	128.8	0	40.3
ENSG00000229992	HMGB3P9	0	0	0	2.7	0	0	0	0	0	0	0	0	0	0	0	0	0	0	0	0	0	0	0	0	0	0	0	0	0	0	0	0	0	0	0	0	0	0
ENSG00000225505	AC104332.1	0	0	0	0	0	0	0	0	1.3	0	0	0	0	0	0	0	0	0	0	0	0	0	0	0	0	0	0	0	0	0	0	0	0	0	0	0	0	0
ENSG00000122406	RPL5	15.6	38.8	43.3	52	22.4	80.3	47.8	34.4	27.2	46.3	45.9	30.6	1.7	0	20.3	32.2	24.8	0	132.2	0	3.1	35.3	87.5	0	29	7.6	32.9	10.5	36.3	45.1	4.8	43	53.8	0	0	0	0	241.6
ENSG00000154511	FAM69A	0	0	20.6	2	0	0	0	0	0	0.9	2.6	0	0	0	0	0	0	0	0	0	0	0	0	0	0	0	0	0	0	0	0	0	0	0	0	0	0	0
ENSG00000207022	SNORA51	0	0.7	0	0	0	0	0	0	0	0	0	0	0	0	0	0	0	0	0	0	0	0	0	0	0	0	0	0	0	0	0	0	0	0	0	0	0	0
ENSG00000229052	AL449283.1	0	0	0	0.7	0	0	0	0	0	4.4	0	0	0	0	0	0	0	0	0	0	0	0	0	0	0	0	0	0	0	0	0	0	0	0	0	0	0	0
ENSG00000143033	MTF2	15.6	60	42.6	58.7	34	31.4	39.9	23.9	54.3	47.2	48.5	55.6	3.5	8.1	0	37.2	228.7	0	299.6	0	0	5	0	0	0	0	31.2	0	34.9	52.7	0	20.8	53.8	0	0	0	0	0
ENSG00000117500	TMED5	168	113.3	97.9	115.4	121.4	97.9	67.7	152.6	104.7	119.2	107.1	104.3	0	162.3	104	162.4	82.5	46.7	2.2	488.6	151.2	277.7	32.8	239.7	308.9	287	170.5	263.7	142.5	120.4	280.2	68.2	53.8	0	0	0	60.2	0
ENSG00000122483	CCDC18	0	0.7	0.7	26.7	3.6	0	0	0	0	0	5.1	11.3	0	0	0	0	0	0	0	0	0	0	0	0	94.9	0	77	0	18.5	0	0	0	0	0	0	0	0	0
ENSG00000237003	AC126124.2	0	0	0	0	0	0	0	0	0	0.9	0	0	0	0	0	0	0	0	0	0	0	0	0	0	0	0	0	0	0	0	0	0	0	0	0	0	0	0
ENSG00000223745	CCDC18-AS1	46.1	92.9	99.4	78.7	60	66.5	38.5	40.4	29.7	62.3	26.8	40.8	15.6	0	90.9	121.5	108.4	3.6	24.2	330.8	0	0	0	103.5	173.8	0	39.8	10.5	77	33.6	187.9	13.3	0	61.1	0	0	0	40.3
ENSG00000229567	AL139421.1	0.7	0.7	0	0	0.7	0.7	0	0	0	0	1.3	0	0	0	1.2	0	0	0	2.2	0	3.1	0	0	0	0	0	0.9	0	2.1	0	0	0	0	0	0	0	0	40.3
ENSG00000117505	DR1	67.7	83.3	85.9	81.3	90.4	64.3	43.8	107.7	78.9	75.6	57.4	69.2	3.5	142	6	100.4	0	0	28.6	3	0	5	21.9	59.9	0	7.6	52.8	0	106.2	90.2	0	94.2	0	122.3	0	0	0	0
ENSG00000137942	FNBP1L	26.4	17.5	32.6	28.7	46.3	16.1	45.2	97.2	113.8	106.8	147.9	125.9	0	438.1	0	1.2	0	3.6	260	200.3	6.3	141.4	0	0	66	15.1	0.9	0	99	125	0	176.5	0	61.1	0	64.4	60.2	40.3
ENSG00000137936	BCAR3	16.9	8	14.2	56.7	32.5	14.6	18.6	22.4	20.7	15.1	15.3	20.4	0	308.3	0	0	0	0	0	0	0	0	0	0	9.7	3.8	32	0	0	3.1	1.6	0	0	0	0	0	60.2	0
ENSG00000260464	AL049796.1	0	0	0	0	0	15.3	0	0	0	0	0	0	0	0	0	0	0	0	0	0	0	0	0	0	0	0	0	0	0.7	0	0	0	0	0	0	0	0	0
ENSG00000067334	DNTTIP2	8.8	5.1	36.9	61.3	13	10.2	37.2	16.5	42.7	20.5	39.5	49.9	0	4.1	0	69.4	0	0	0	12.1	0	156.5	0	0	0	3.8	43.3	0	0	34.4	0	0.4	0	0	0	0	0	0
ENSG00000023909	GCLM	19.6	38.8	7.1	71.3	41.9	25.6	37.2	58.3	36.2	49.8	63.8	44.2	0	0	111.2	117.8	0	0	33	0	0	0	21.9	0	0	0	52.8	0	0.7	16.6	106.7	38.2	0	0	0	0	0	40.3
ENSG00000198691	ABCA4	0	0.7	0	0	0	0	1.3	0	15.5	0	14	4.5	0	0	0	0	0	0	0	0	0	0	0	0	0	0	0	0	0	31.3	0	23	0	0	0	0	0	0
ENSG00000137962	ARHGAP29	13.5	21.9	32.6	9.3	42.6	13.9	134.2	166	134.5	122.8	182.3	133.8	124.8	109.5	327.6	39.7	62.5	420.4	11	106.2	3.1	5	0	196.1	252.6	203.9	131.6	0	49.9	193.2	199	271.7	0	61.1	0	0	0	80.5
ENSG00000264963	RN7SL440P	3.4	8	0	10	0	0	4	9	0	2.7	1.3	1.1	0	0	0	0	0	0	0	0	0	0	0	0	0	0	13.8	0	0.7	7.1	0	6.3	0	0	0	0	903.4	0
ENSG00000117528	ABCD3	24.4	12.4	9.2	17.3	36.9	0	118.2	131.6	95.7	82.7	94.4	59	0	4.1	0	19.8	84.9	86.2	0	0	743.2	0	10.9	0	98.1	166.2	0	200.4	74.1	83.9	0	121.2	0	0	67.4	0	0	0
ENSG00000117525	F3	198.5	270.5	193.7	228	156.1	228.6	89	79.3	54.3	97.9	80.3	90.7	998.4	8.1	65.8	0	87.2	226.4	429.6	136.6	0	5	0	141.6	54.7	177.5	52.8	400.8	27.8	80.8	20.7	54.1	0	0	0	0	0	0
ENSG00000223675	AC093117.1	0	0	0	0	1.4	0	0	0	0	0	0	1.1	0	0	0	0	0	0	0	0	0	0	0	0	0	0	0	0	0	0	0	0	0	0	0	0	0	0
ENSG00000224081	SLC44A3-AS1	2.7	2.9	1.4	0	0	8.8	4	4.5	12.9	5.3	3.8	17	0	0	0	0	0	0	0	0	0	0	0	0	0	0	5.2	0	0	3.6	0	0	0	0	0	0	0	0
ENSG00000143036	SLC44A3	2.7	2.9	0	0	0	0	6.6	0	3.9	2.7	8.9	13.6	0	0	0	0	0	0	0	0	0	0	0	0	0	3.8	0	0	0	0	0	0	0	0	0	0	0	0
ENSG00000117519	CNN3	157.9	141.1	189.5	116.7	203.8	131.5	216.5	249.8	226.3	183.3	173.4	224.6	395.2	16.2	314.5	405.5	173.3	0	1147.8	0	743.2	10.1	32.8	0	283.2	94.4	159.3	152.9	232.3	216.5	176.7	88.6	0	0	0	0	0	40.3
ENSG00000235501	AC105942.1	0.7	0	0	0	0	0	1.3	13.5	0	0.9	0	5.7	0	0	0	52.1	0	0	0	0	0	0	0	0	0	0	0	0	0	0	25.5	3	0	0	0	0	0	0
ENSG00000172339	ALG14	24.4	7.3	21.3	12	21.7	5.8	26.6	61.3	28.4	8.9	42.1	34	1.7	0	40.7	43.4	0	100.6	0	0	0	0	0	0	51.5	0	0	0	156.1	18	0	65.2	0	0	0	0	0	0
ENSG00000152078	TMEM56	8.1	5.8	2.1	2	13	16.1	12	35.9	28.4	21.4	14	20.4	0	0	0	0	91.9	0	0	0	0	0	0	0	234.9	3.8	0	0	0	19.9	1.6	0.4	0	0	0	0	0	0
ENSG00000225923	AC092393.1	0	0	0	0	0	0	0	0	0	0.9	0	0	0	0	0	0	0	0	0	0	0	0	0	0	0	0	0	0	0	0	0	0	0	0	0	0	0	0
ENSG00000228502	EEF1A1P11	3.4	1.5	2.1	2.7	2.2	0	1.3	1.5	1.3	2.7	1.3	2.3	3.5	0	0	1.2	11.8	28.7	8.8	0	0	0	0	0	1.6	0	11.3	0	0.7	0	0	3.3	107.7	0	0	0	0	0
ENSG00000234226	NDUFS5P2	25.7	4.4	13.5	20	3.6	57	25.2	7.5	56.9	1.8	14	25	0	0	0	0	0	0	0	0	0	0	0	0	0	0	0	606.4	0	3.8	0	34.5	0	0	0	0	0	0
ENSG00000137970	RPL7P9	147	167.4	177.4	238.7	224.1	290.7	217.9	216.9	253.4	211.7	249.9	280.1	166.4	142	108.8	122.8	208.6	230	138.8	170	85	10.1	10.9	250.6	445.6	339.9	225.1	10.5	165.3	340.7	208.6	136.8	53.8	244.6	0	0	240.9	161.1
ENSG00000117569	PTBP2	37.9	5.1	1.4	8.7	6.5	8	4	19.4	14.2	21.4	12.8	13.6	0	0	2.4	0	0	0	83.7	0	0	5	0	0	75.6	3.8	32.9	5.3	0	5.7	132.2	42.3	0	0	0	0	0	0
ENSG00000188641	DPYD	28.5	75.3	53.2	98	50.6	93.5	12	13.5	23.3	24.9	11.5	9.1	0	0	0	5	0	301.8	0	94.1	0	0	10.9	190.7	30.6	302.1	0.9	0	15	34.2	0	0	0	0	67.4	0	0	0
ENSG00000228057	SEC63P1	58.3	81.2	67.4	45.3	118.5	53.3	67.7	74.8	122.8	146.8	167	118	0	178.5	143.5	133.9	145	0	295.2	0	0	212.1	10.9	0	25.7	3.8	64.1	358.6	0	107.2	92.4	52.6	0	0	0	0	60.2	40.3
ENSG00000226128	RPL26P9	0.7	1.5	0	0.7	2.2	2.2	0	0	0	0.9	0	1.1	0	0	2.4	0	0	0	0	0	0	0	0	0	0	0	0	0	0	0	0	0	0	0	0	0	0	0
ENSG00000225206	MIR137HG	0	0	0	0	0	0	0	0	0	0	0	0	0	0	0	0	0	0	0	0	0	0	0	0	0	0	3.5	0	0	0	0	0	0	0	0	0	0	0
ENSG00000162627	SNX7	54.2	40.9	19.9	24.7	25.3	46	30.6	3	11.6	17.8	6.4	9.1	0	0	0	0	0	0	121.2	103.2	0	0	0	163.4	0	3.8	0.9	0	0	15.3	0	0	0	0	0	0	0	0
ENSG00000117598	PLPPR5	0	0.7	0	0	0	0	0	0	0	3.6	0	0	0	0	0	0	0	79	0	0	0	0	0	0	0	0	0	0	0	3.4	0	19.6	0	0	0	0	0	0
ENSG00000227034	AL445433.1	40	11	31.2	22	55.7	59.2	26.6	34.4	32.3	7.1	23	22.7	57.2	4.1	0	9.9	21.2	43.1	297.4	0	0	0	0	0	46.7	0	34.6	31.6	37.8	26	25.5	27.4	0	0	0	0	0	40.3
ENSG00000117600	PLPPR4	26.4	5.8	0	6.7	11.6	0	5.3	0	9.1	1.8	0	11.3	0	0	0	1.2	1.2	0	0	0	0	0	0	0	0	0	0	0	0	0	0	0	0	0	0	0	0	0
ENSG00000224445	LINC01708	0	0	0	0	0	0	0	0	0	0	0	0	0	0	0	0	0	0	0	0	0	0	0	0	0	0	0	0	0	0	1.6	0	0	0	0	0	0	0
ENSG00000099260	PALMD	35.2	13.2	32.6	28.7	112.8	76.7	39.9	62.8	44	31.1	34.4	40.8	454.2	4.1	260.7	0	11.8	118.6	0	0	3.1	0	0	49	1.6	0	82.2	131.8	19.2	36.9	124.2	96	0	0	0	0	0	40.3
ENSG00000223656	HMGB3P10	0	0	0	0	0	0	0	1.5	0	0	0	0	0	0	0	0	0	0	0	0	0	0	0	0	0	0	0	0	0	0	0	0	0	0	0	0	0	0
ENSG00000156869	FRRS1	0	0	0	0	0	0	0	0	0	0	1.3	0	0	0	0	0	0	0	0	0	0	0	0	0	0	0	0	0	0	0	0	0	0	0	0	0	0	0
ENSG00000201491	RNU4-75P	0	0	0	0	0	0	0	0	0	0	0	0	0	0	0	0	0	0	0	0	0	0	0	0	0	0	0	0	0	0	0	0.7	0	0	0	0	0	0
ENSG00000202254	Y_RNA	0	0	0	0	0	0	0	0	0	0	1.3	0	0	0	0	0	0	0	0	0	0	0	0	0	0	0	0	0	0	0	0	0	0	0	0	0	0	0
ENSG00000162688	AGL	24.4	36.6	34.8	28.7	25.3	46	21.3	53.8	27.2	19.6	31.9	22.7	180.3	0	0	0	80.2	319.8	141	3	0	10.1	10.9	0	48.3	3.8	11.3	0	1.4	21.8	186.3	0	0	0	0	0	60.2	0
ENSG00000117620	SLC35A3	35.9	20.5	33.4	27.3	120	33.6	154.1	88.2	121.5	131.7	141.5	82.8	3.5	0	3.6	24.8	136.7	0	0	0	0	0	0	5.4	159.3	7.6	45.9	158.2	27.8	91.7	8	26	0	61.1	67.4	0	0	0
ENSG00000283761	AC118553.2	0	0	1.4	0	0	0	0	0	1.3	0	0	0	0	0	0	0	0	0	0	0	0	0	0	0	0	0	0	0	0	0	0	0	0	0	0	0	0	0
ENSG00000156876	SASS6	0	4.4	6.4	16	0	13.9	9.3	28.4	18.1	4.4	21.7	12.5	0	0	0	0	0	0	0	0	0	0	0	0	0	313.5	0	0	19.2	82.7	0	0	0	0	0	0	0	40.3
ENSG00000122435	TRMT13	26.4	16.1	14.2	16	64.3	27	18.6	10.5	10.3	27.6	12.8	5.7	0	0	212.8	0	0	0	0	0	0	0	0	0	0	11.3	32.9	5.3	119.7	20.6	0	24.1	0	2629.3	0	0	0	0
ENSG00000122477	LRRC39	9.5	2.2	5	13.3	0	4.4	0	0	0	0	0	0	1.7	0	0	0	0	0	0	0	0	0	0	0	0	0	28.6	0	0	0	0	0	0	0	0	0	0	0
ENSG00000137992	DBT	37.3	21.2	26.3	31.3	15.2	59.2	25.2	20.9	46.5	25.8	24.2	28.4	0	4.1	0	1.2	0	0	2.2	0	0	0	0	0	0	0	55.4	10.5	0	8.4	272.3	30.4	0	0	0	0	0	0
ENSG00000225169	BRI3P1	0	0	3.5	3.3	0	0	0	0	0	0	0	0	0	0	0	0	0	0	0	0	0	0	0	0	0	0	0	0	0	0	0	0	0	0	0	0	0	0
ENSG00000230287	AL445928.1	0	0	0	0	0	0	0	0	0	0	0	0	0	0	0	0	0	0	0	0	0	0	0	0	0	0	0	0	0	0.2	0	0	0	0	0	0	0	0
ENSG00000224616	RTCA-AS1	0	0	0	0	0	0	8	0	0	6.2	3.8	0	0	0	0	0	205.1	0	0	0	0	0	0	0	0	0	0	0	0	0	0	0	0	0	0	0	0	0
ENSG00000137996	RTCA	14.9	27.8	27.7	60	70.8	33.6	54.5	50.9	68.5	53.4	67.6	32.9	0	12.2	72.9	65.7	0	0	0	0	0	0	0	223.3	22.5	7.6	84	0	0	118.5	31.8	112.3	0	0	0	0	0	40.3
ENSG00000079335	CDC14A	8.1	8.8	0	15.3	0.7	0	8	19.4	0	9.8	1.3	2.3	0	0	0	0	0	0	0	0	0	0	0	0	1.6	0	0	0	0	3.4	0	9.6	0	0	0	0	0	0
ENSG00000234332	BCAS2P2	0	0	0	0	0	2.2	0	0	0	0	0	0	0	0	0	0	0	0	0	0	0	0	0	0	0	0	0	0	0	0	0	0	0	0	0	0	0	0
ENSG00000181656	GPR88	0.7	0	9.2	0	0	2.2	0	0	0	0	0	0	0	0	0	0	0	0	0	0	0	0	0	0	0	0	0	0	0	0	0	0	0	0	0	0	0	0
ENSG00000162692	VCAM1	48.8	66.5	37.6	92	117.8	51.1	5.3	17.9	3.9	18.7	5.1	6.8	0	0	0	164.9	0	104.2	123.4	0	0	0	10.9	310.5	151.2	0	164.5	100.2	228.7	18.7	186.3	6.3	0	61.1	0	0	0	0
ENSG00000162694	EXTL2	32.5	9.5	19.2	26.7	31.1	0	21.3	17.9	11.6	24.9	30.6	11.3	0	0	240.3	0	130.8	521	44.1	0	0	0	0	0	80.4	0	11.3	0	0	26.2	51	0.4	0	0	0	0	0	40.3
ENSG00000273204	AC104506.1	0	3.7	0	0	0	0	2.7	3	0	0	2.6	6.8	0	0	0	0	0	0	0	0	0	0	0	0	0	0	0	0	0.7	3.1	0	0	0	0	0	0	0	0
ENSG00000162695	SLC30A7	62.3	89.9	96.5	68	77.3	95.7	118.2	130.1	122.8	105	109.7	99.8	190.7	8.1	15.5	228.2	46	0	0	109.3	0	0	0	0	120.7	0	39.8	179.3	41.3	111.4	41.4	101.6	0	0	0	0	0	0
ENSG00000117543	DPH5	11.5	11.7	12.1	16	14.5	15.3	15.9	25.4	10.3	9.8	44.6	20.4	159.5	0	100.4	67	0	14.4	0	0	0	0	10.9	0	45	7.6	67.5	0	0.7	19.9	0	11.1	0	0	0	2253.7	0	0
ENSG00000233184	AC093157.1	0	2.2	0	9.3	0	19	1.3	6	2.6	13.3	1.3	3.4	0	0	0	0	0	0	0	0	0	0	0	0	0	0	0	0	0	6.5	0	0	0	0	0	0	0	40.3
ENSG00000252765	SCARNA16	0	0	0	0	0	0	0	0	0	0	1.3	0	0	0	0	0	0	0	0	0	0	0	0	0	0	0	0	0	0	0	0	0	0	0	0	0	0	0
ENSG00000170989	S1PR1	19.6	21.9	15.6	9.3	17.3	84	0	6	1.3	0	2.6	2.3	0	12.2	120.8	111.6	35.4	143.7	57.3	315.6	0	227.2	10.9	103.5	181.8	0	161.9	0	0	20.6	100.3	40.4	0	0	0	64.4	0	40.3
ENSG00000260940	AL109741.3	0	0	0	0	0.7	0	0	0	0	0	0	1.1	0	0	0	0	0	0	0	0	195.2	0	0	0	0	0	0	0	0	0	0	0	0	0	0	0	0	0
ENSG00000228399	AL109741.2	2	11	14.2	24.7	8.7	2.9	12	16.5	5.2	2.7	2.6	7.9	1.7	0	52.6	36	8.3	0	33	18.2	0	0	10.9	0	8	0	9.5	0	47	12.6	1.6	8.9	0	0	0	0	0	0
ENSG00000183298	RPSAP19	0.7	6.6	7.1	13.3	4.3	1.5	1.3	0	6.5	3.6	3.8	30.6	0	0	0	34.7	0	3.6	41.9	0	0	0	0	0	0	0	0.9	0	0	7.1	0	4.1	0	0	337	0	0	0
ENSG00000118733	OLFM3	0	0	0	0	0	0	0	0	0	1.8	0	0	0	0	0	0	0	0	0	0	0	0	0	0	0	0	0	0	0	0	0	0	0	0	0	0	0	0
ENSG00000060718	COL11A1	74.5	51.9	66.7	66	28.9	67.9	83.7	16.5	24.6	48.9	12.8	44.2	0	0	0	0	67.2	0	0	0	0	0	0	0	0	3.8	0	0	0.7	17.6	111.5	48.9	53.8	0	0	0	0	0
ENSG00000224613	AC095032.1	0	0	0	0	0	0	0	0	0	0	0	0	0	0	0	0	1.2	0	0	0	0	0	0	0	0	0	0	0	0	0	0	0	0	0	0	0	0	0
ENSG00000185946	RNPC3	18.3	31.4	23.4	29.3	9.4	34.3	17.3	26.9	23.3	20.5	54.8	13.6	3.5	0	129.1	153.8	0	82.6	0	3	242.5	0	0	0	3.2	3.8	122	147.6	57.7	33.8	4.8	60.4	0	0	0	0	0	0
ENSG00000240038	AMY2B	1.4	0.7	8.5	4.7	5.8	2.2	0	12	2.6	3.6	2.6	1.1	0	0	2.4	0	0	3.6	0	3	3.1	0	0	0	0	7.6	1.7	0	2.9	1.3	0	1.1	0	0	0	0	0	0
ENSG00000174876	AMY1B	0	0	0	0	0	0	0	0	0	0	0	0	0	0	0	0	0	0	0	0	0	0	0	0	0	0	0	0	0	0	0	0.4	0	0	0	0	0	0
ENSG00000187733	AMY1C	0	0	0	0	0	0	0	1.5	0	0	0	0	0	0	0	0	0	0	0	0	0	0	0	0	0	0	0	0	0	0	0	0	0	0	0	0	0	0
ENSG00000215869	AC092506.1	0	0	3.5	0	0	0	0	0	0	0	1.3	0	0	0	0	0	0	0	0	0	0	0	0	0	0	0	0	0	0	4.2	0	0	0	0	0	0	0	0
ENSG00000228347	FTLP17	229	223.7	195.9	178.7	112.8	151.9	5.3	3	3.9	3.6	1.3	2.3	169.9	44.6	43	65.7	90.8	7.2	108	88	182.7	25.2	0	0	0	0	49.3	0	25.7	5.5	0	15.6	53.8	61.1	67.4	0	0	40.3
ENSG00000230768	LINC01676	0	0	0	0	0	0	0	0	0	0	2.6	0	0	0	0	0	0	0	0	0	0	0	0	0	0	0	0	0	0	0	0	0	0	0	0	0	0	0
ENSG00000227850	SEPT2P1	0	0	0	0	0	0	0	0	0	0	1.3	0	0	0	0	0	0	0	0	0	0	0	0	0	0	0	0	0	0	0	0	0	0	0	0	0	0	0
ENSG00000237897	AL512844.2	10.2	23.4	26.3	17.3	46.3	11	41.2	16.5	22	17.8	40.8	18.1	0	0	56.2	0	60.1	0	0	0	0	0	0	0	0	0	78.8	0	25.7	52.2	55.7	36	0	0	0	0	0	0
ENSG00000232952	AL512844.1	0	12.4	6.4	10	1.4	9.5	5.3	19.4	3.9	5.3	10.2	10.2	0	0	0	0	0	0	0	0	0	0	0	0	0	0	0	342.8	0	3.6	0	0.4	0	0	0	0	0	0
ENSG00000233449	MTATP6P14	0	0	0	0	0	0	0	0	0	0	0	0	0	0	0	0	0	0	0	0	0	0	0	0	0	0	0	0	0	0.2	0	0	0	0	0	0	0	0
ENSG00000232551	MTCO1P14	0	0.7	0.7	0	0	0	0	0	1.3	0	0	2.3	0	0	0	0	0	0	0	0	0	0	0	0	0	0	0	0	0	1.5	0	0	0	0	0	0	0	0
ENSG00000198890	PRMT6	39.3	13.9	5.7	11.3	10.8	27.8	9.3	29.9	25.9	16.9	26.8	18.1	0	0	0	32.2	0	0	0	0	0	0	0	0	0	0	0	0	0	0	0	0.4	0	0	0	0	0	0
ENSG00000224550	AC114491.1	7.5	17.5	41.2	32	12.3	15.3	35.9	10.5	24.6	43.6	11.5	20.4	0	413.7	1.2	0	236.9	783.3	0	0	3.1	10.1	0	0	493.9	0	14.7	0	0	27.5	1.6	0	0	0	0	0	60.2	0
[truncated: 26,415 more rows]

## Sheet: rlog
Ensembl ID	gene name	macrophage_bulk_1	macrophage_bulk_2	macrophage_bulk_3	macrophage_bulk_4	macrophage_bulk_5	macrophage_bulk_6	DCIS_bulk_1	DCIS_bulk_2	DCIS_bulk_3	DCIS_bulk_4	DCIS_bulk_5	DCIS_bulk_6	macrophage_single_1	macrophage_single_2	macrophage_single_3	macrophage_single_4	macrophage_single_5	macrophage_single_6	macrophage_single_7	macrophage_single_8	macrophage_single_9	macrophage_single_10	DCIS_single_1	DCIS_single_2	DCIS_single_3	DCIS_single_4	DCIS_single_5	DCIS_single_6	DCIS_single_7	DCIS_single_8	DCIS_single_9	DCIS_single_10	control_1	control_2	control_3	control_4	control_5	control_6
[truncated: 27,686 more rows]

[truncated: 6 more sheets: bulk comparison, single comparison, amp comparison, site comparison, single vs. bulk, DCIS vs. macrophage]
